# Supplementary material for: New quinoxaline-based VEGFR-2 inhibitors: design, synthesis, and antiproliferative evaluation with in silico docking, ADMET, toxicity, and DFT studies
Source: Royal Society of Chemistry journal article supplement (doi:10.1039/d1ra05925d), 2021-01-01
Supplement: d1ra05925d1.pdf [file d1ra05925d1.pdf]

## New quinoxaline-based VEGFR-2 inhibitors: design, synthesis, and antiproliferative evaluation with in silico docking, ADMET, toxicity, and DFT studies

Mohammed M. Alanazi<sup>a</sup>, Hazem Elkady<sup>b\*</sup>, Nawaf A. Alsaif<sup>a</sup>, Ahmad J. Obaidullah<sup>a</sup>, Hamad M. Alkahtani<sup>a</sup>, Manal M. Alanazi<sup>a</sup>, Madhawi A. Alharbi<sup>a</sup>, Ibrahim H. Eissa<sup>b\*</sup>, Mohammed A. Dahab<sup>b\*</sup>.

<sup>a</sup>Department of Pharmaceutical Chemistry, College of Pharmacy, King Saud University, P.O. Box 2457, Riyadh 11541, Saudi Arabia.

<sup>b</sup>Pharmaceutical Medicinal Chemistry & Drug Design Department, Faculty of Pharmacy (Boys), Al-Azhar University, Cairo11884, Egypt

### \* Corresponding authors:

#### Mohammed A. Dahab

Pharmaceutical Medicinal Chemistry & Drug Design Department, Faculty of Pharmacy (Boys), Al-Azhar University, Cairo11884, Egypt

[mohammeddahab@azhar.edu.eg](mailto:mohammeddahab@azhar.edu.eg)

#### Ibrahim H. Eissa

Pharmaceutical Medicinal Chemistry & Drug Design Department, Faculty of Pharmacy (Boys), Al-Azhar University, Cairo11884, Egypt

[ibrahimeissa@azhar.edu.eg](mailto:ibrahimeissa@azhar.edu.eg)

#### Hazem Elkady

Pharmaceutical Medicinal Chemistry & Drug Design Department, Faculty of Pharmacy (Boys), Al-Azhar University, Cairo11884, Egypt

[Hazemelkady@azhar.edu.eg](mailto:Hazemelkady@azhar.edu.eg)

### Content

|          |                                                                                                                          |
|----------|--------------------------------------------------------------------------------------------------------------------------|
| <b>1</b> | <b>Chemical structures of the target compounds</b>                                                                       |
| <b>2</b> | <b><i>In silico</i> studies</b>                                                                                          |
| <b>3</b> | <b>Experimental section</b><br><b>1. Chemistry</b><br><b>2. Biological testing</b><br><b>3. <i>In silico</i> studies</b> |
| <b>4</b> | <b>Spectral analyses</b>                                                                                                 |
| <b>5</b> | <b>References</b>                                                                                                        |

Chemical structures of the target compounds 15a-d, 16, 17a-d, and 18

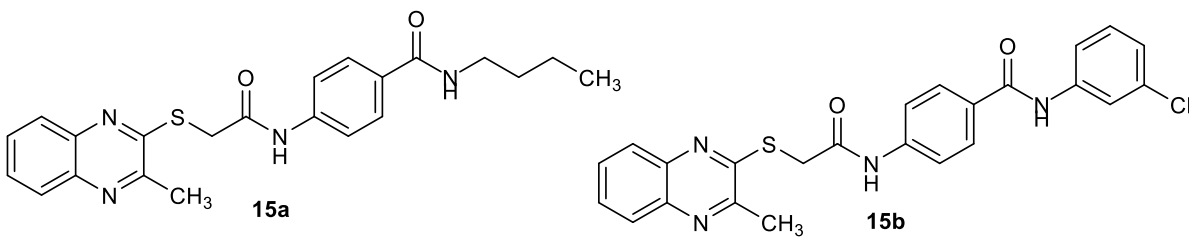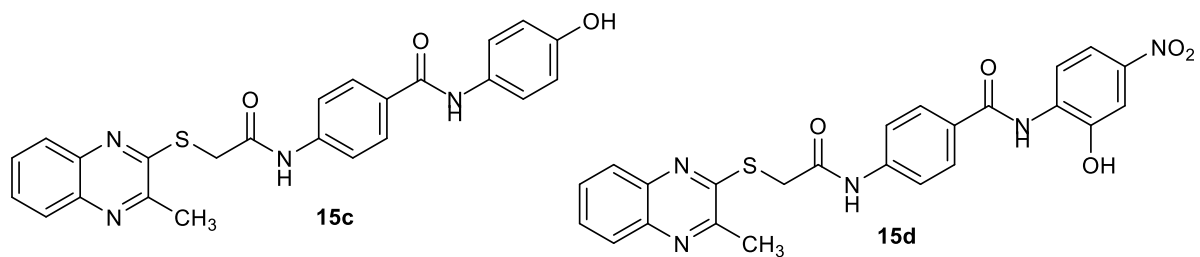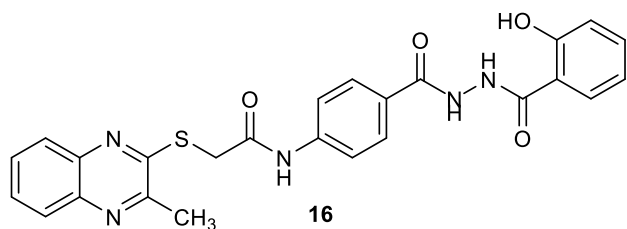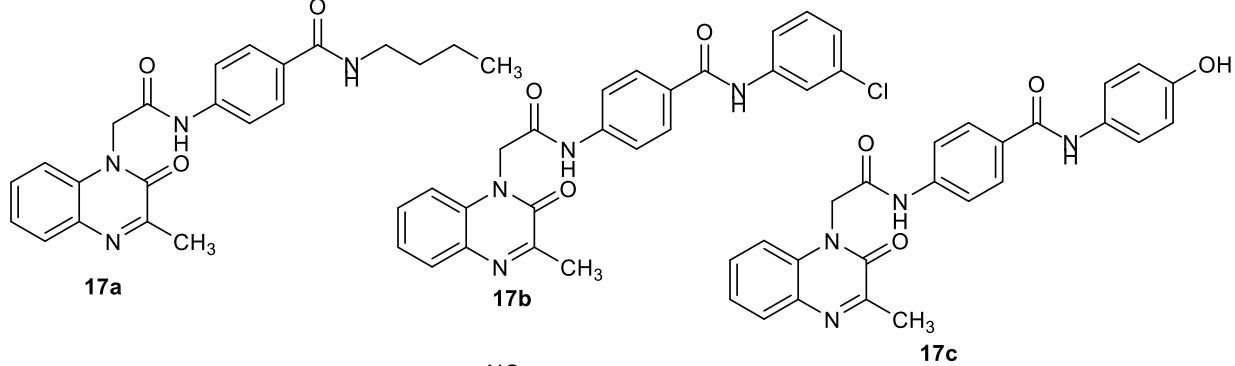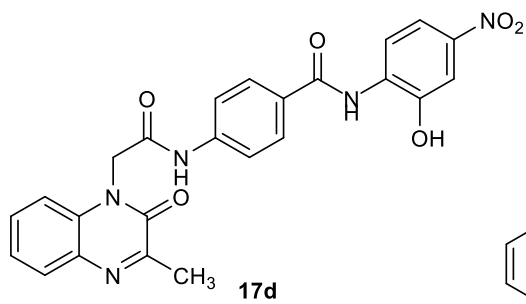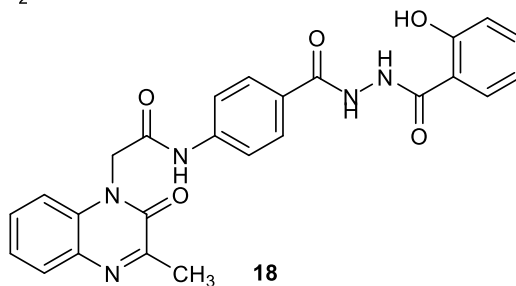

## In silico studies

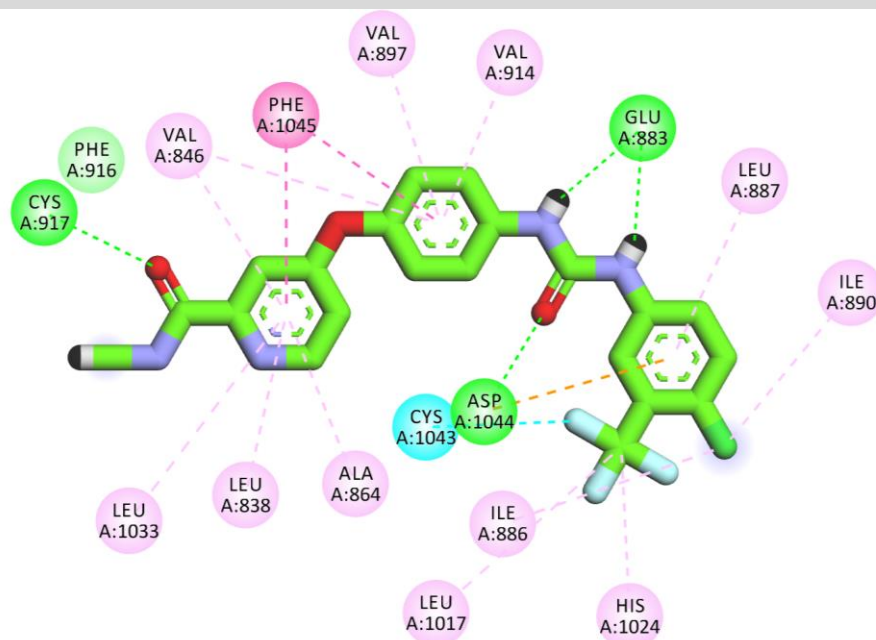

**Fig. 1:** Interaction of sorafenib with the essential amino acids inside VEGFR-2 active site (**2D**)

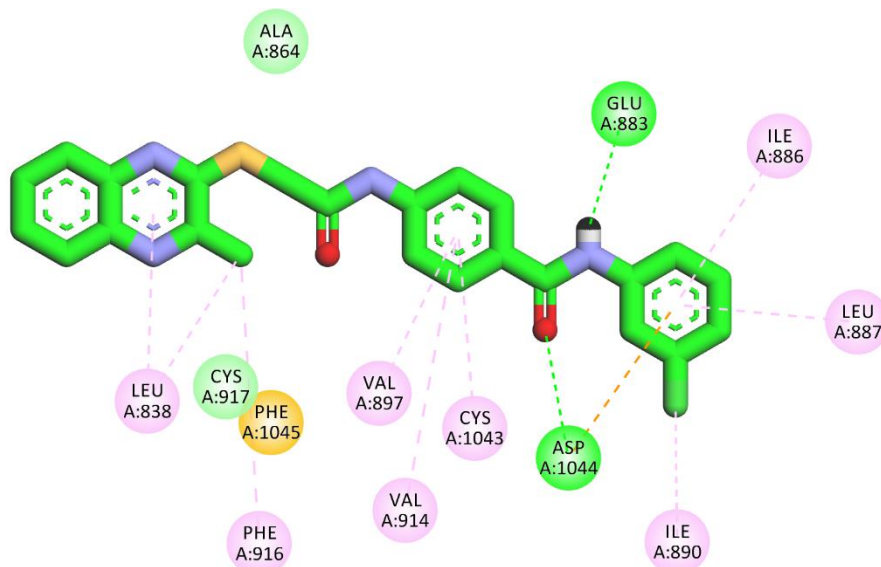

**Fig. 2:** Mapping surface of **15b**. Green dashed lines = hydrogen bonds, Orange lines = hydrophobic interactions (**2D**)

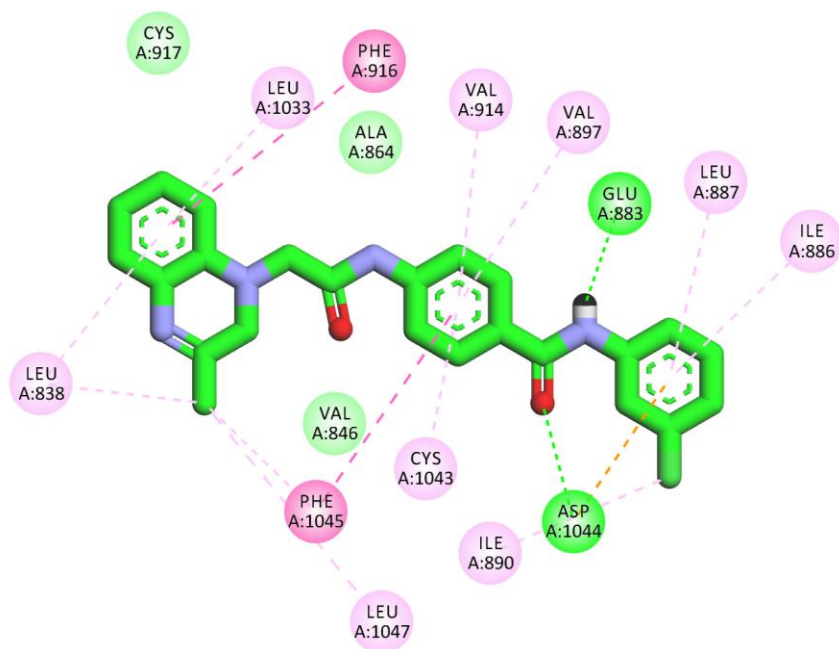

**Fig. 3:** Mapping surface of **17b**. Green dashed lines = hydrogen bonds, orange lines = hydrophobic interactions (**2D**).

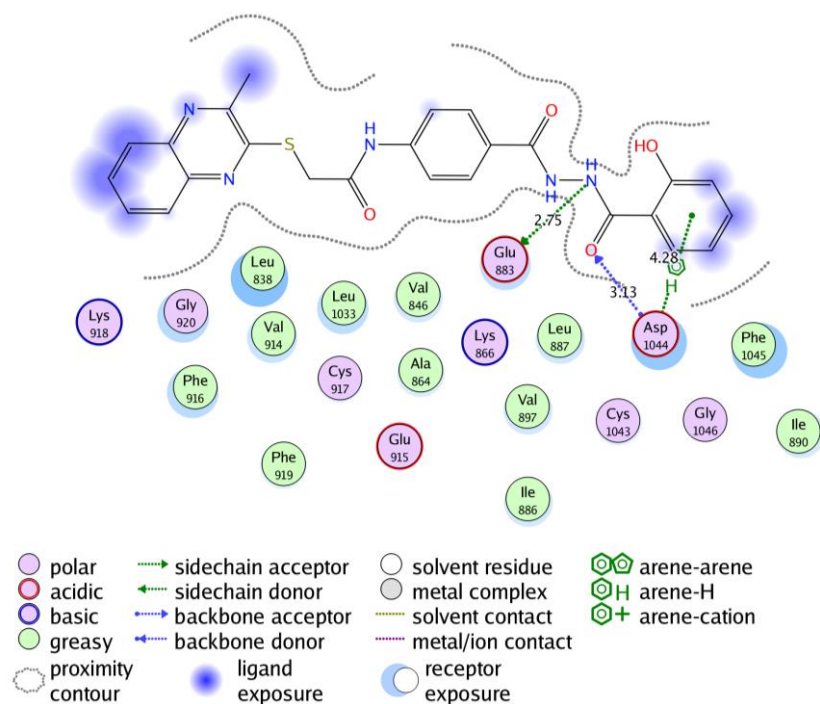

**Fig. 4:** The predicted binding pattern of compound 16 with the active site of VEGFR-2 (**2D**).

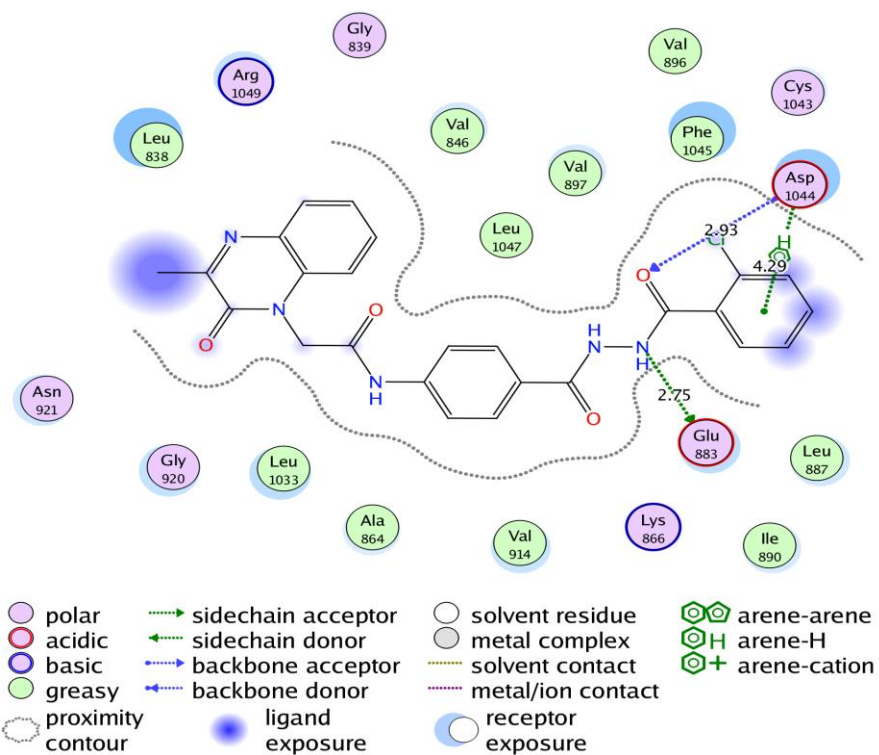

**Fig. 5:** The predicted binding pattern of compound 18 with the active site of VEGFR-2 (2D).

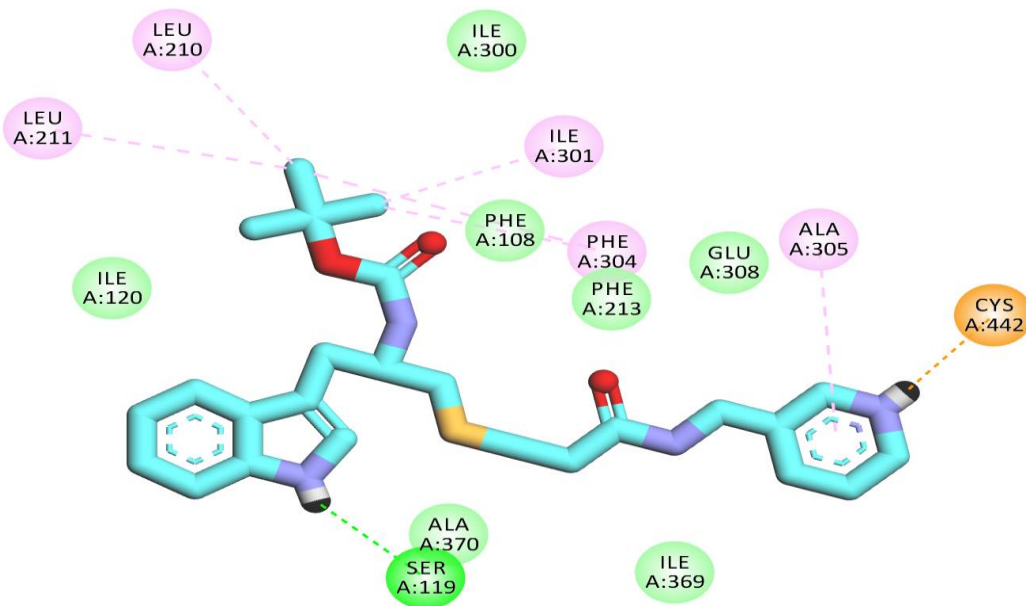

**Fig. 6.** 2D Structure of co-crystallized ligand (PKT) docked into active pocket of cytochrome P450.

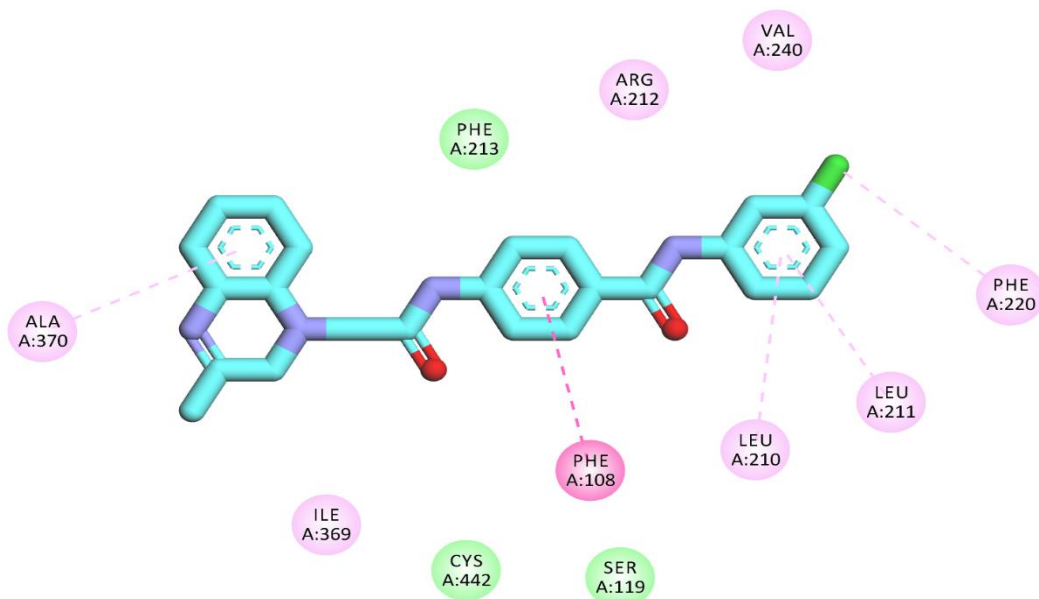

**Fig. 7.** 2D Structure of compound 17b docked into active pocket of cytochrome P450.

### *In silico* ADMET studies

Blood brain barrier(BBB) penetration, intestinal absorption, aqueous solubility, CYP2D6 binding, and plasma protein binding properties of the synthesized compounds were calculated using Discovery studio 4.0. The BBB penetration levels of the tested compounds were in the low and very low range except compounds **15a** which was showed medium level of BBB penetration. Depending on these results, it may be concluded that there are no CNS side effects associated with these compounds. The tested compounds showed low or good levels of aqueous solubility. In addition, compounds **15a**, **15b**, **15c**, **17a**, **17b**, and **17c** showed good levels of intestinal absorption. For cytochrome P450 2D6 (CYP2D6) inhibition, all compounds were predicted as non-inhibitors. Finally, all compounds were expected to bind plasma protein less than 90% except **15b** and **17b** (Table 1 & Fig. 8)

**Table 1.** ADMET parameters for the synthesized compounds.

| Comp.      | BBB level <sup>a</sup> | Solubility level <sup>b</sup> | Absorption level <sup>c</sup> | CYP2D6 prediction <sup>d</sup> | PPB prediction <sup>e</sup> |
|------------|------------------------|-------------------------------|-------------------------------|--------------------------------|-----------------------------|
| <b>15a</b> | ++                     | ++                            | 0                             | F                              | Less than 90%               |
| <b>15b</b> | ++++                   | ++                            | 0                             | F                              | More than 90%               |
| <b>15c</b> | ++++                   | ++                            | 0                             | F                              | Less than 90%               |
| <b>15d</b> | ++++                   | ++                            | ++                            | F                              | Less than 90%               |
| <b>16</b>  | ++++                   | ++                            | ++                            | F                              | Less than 90%               |

|                  |      |     |     |   |               |
|------------------|------|-----|-----|---|---------------|
| <b>17a</b>       | +++  | +++ | 0   | F | Less than 90% |
| <b>17b</b>       | +++  | ++  | 0   | F | More than 90% |
| <b>17c</b>       | ++++ | +++ | 0   | F | Less than 90% |
| <b>17d</b>       | ++++ | +++ | +++ | F | Less than 90% |
| <b>18</b>        | ++++ | +++ | ++  | F | Less than 90% |
| <b>Sorafenib</b> | ++++ | +   | 0   | F | More than 90% |

<sup>a</sup> BBB level, blood brain barrier level, 0 = very high, + = high, ++ = medium, +++ = low, ++++ = very low.

<sup>b</sup> Solubility level, + = very low, ++ = low, +++ = good, ++++ = optimal.

<sup>c</sup> Absorption level, 0 = good, + = moderate, ++ = poor, +++ = very poor.

<sup>d</sup> CYP2D6, cytochrome P2D6, T = inhibitor, F = non inhibitor.

<sup>e</sup> PBB, plasma protein binding (less than 90% or more than 90%)

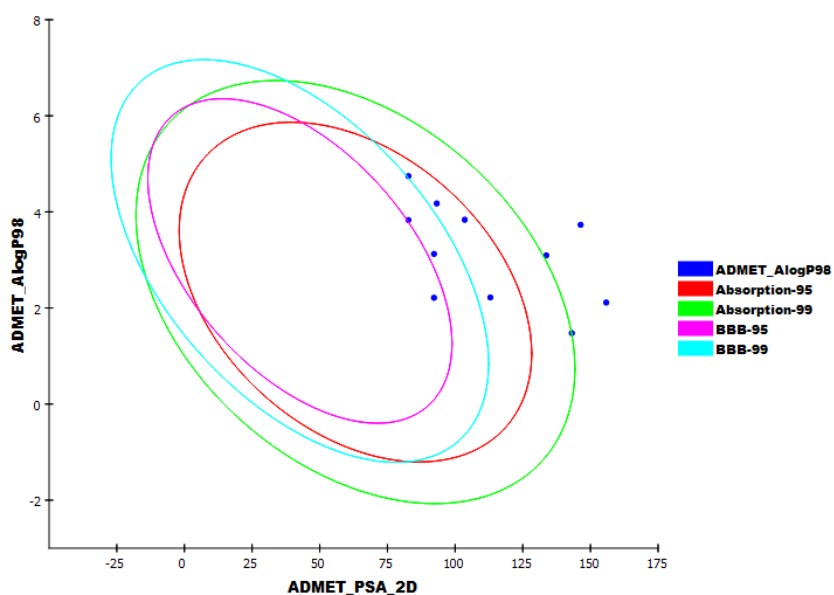

**Fig. 8:** The expected ADMET study

### ***In silico* toxicity studies**

Toxicity profile of the synthesized compounds was predicted according to the built-in models of Discovery studio 4.0 software <sup>1, 2</sup>. Seven toxicity parameters were calculated and summarized in **Table 2**.

At first, the carcinogenic potency TD<sub>50</sub> values (from 9.366 to 142.906 mg/kg body weight/day) of the tested compounds were higher than that of the reference molecule; sorafenib (TD<sub>50</sub> = 19.236 mg/kg body weight/day), except compounds **15d** and **16**. In addition, the maximum

tolerated dose values (from 0.096 to 0.333 g/kg body weight) of all compounds were higher than sorafenib (0.089 g/kg body weight). Furthermore, the tested compounds showed oral LD<sub>50</sub> values ranging from 4.703 to 12.496 mg/kg body weight/day which were higher than that of sorafenib (0.823 mg/kg body weight/day). For rat chronic lowest observed adverse effect level (LOAEL), the tested molecules showed higher values (from 0.072 to 0.583 g/kg body weight) than sorafenib (0.005 g/kg body weight). Moreover, the tested compound was predicted to be mild irritant against eyes and non-irritant against skin. For aerobic biodegradability model, all compounds were anticipated to be non-degradable except compound **17a**.

**Table 2:** Toxicity profile of the synthesized compounds

| Comp.            | Carcinogenic Potency TD <sub>50</sub> (Mouse) <sup>a</sup> | Rat Maximum Tolerated Dose (Feed) <sup>b</sup> | Rat Oral LD <sub>50</sub> <sup>b</sup> | Rat Chronic LOAEL <sup>b</sup> | Ocular Irritancy | Skin Irritancy | Aerobic Biodegradability |
|------------------|------------------------------------------------------------|------------------------------------------------|----------------------------------------|--------------------------------|------------------|----------------|--------------------------|
| <b>15a</b>       | 40.565                                                     | 0.132                                          | 12.496                                 | 0.583                          | Mild             | Non-Irritant   | Non-Degradable           |
| <b>15b</b>       | 9.366                                                      | 0.123                                          | 4.969                                  | 0.114                          | Mild             | Non-Irritant   | Non-Degradable           |
| <b>15c</b>       | 17.665                                                     | 0.333                                          | 5.932                                  | 0.181                          | Mild             | Non-Irritant   | Non-Degradable           |
| <b>15d</b>       | 31.468                                                     | 0.244                                          | 6.811                                  | 0.091                          | Mild             | Non-Irritant   | Non-Degradable           |
| <b>16</b>        | 16.061                                                     | 0.364                                          | 4.703                                  | 0.382                          | Mild             | Non-Irritant   | Non-Degradable           |
| <b>17a</b>       | 142.906                                                    | 0.097                                          | 18.136                                 | 0.334                          | Mild             | Non-Irritant   | Degradable               |
| <b>17b</b>       | 33.153                                                     | 0.096                                          | 7.450                                  | 0.072                          | Mild             | Non-Irritant   | Non-Degradable           |
| <b>17c</b>       | 62.436                                                     | 0.259                                          | 7.868                                  | 0.132                          | Mild             | Non-Irritant   | Non-Degradable           |
| <b>17d</b>       | 111.609                                                    | 0.191                                          | 5.470                                  | 0.103                          | Mild             | Non-Irritant   | Non-Degradable           |
| <b>18</b>        | 56.955                                                     | 0.284                                          | 5.956                                  | 0.271                          | Mild             | Non-Irritant   | Non-Degradable           |
| <b>Sorafenib</b> | 19.236                                                     | 0.089                                          | 0.823                                  | 0.005                          | Mild             | Non-Irritant   | Non-Degradable           |

<sup>a</sup> Unit: mg/kg body weight/day

<sup>b</sup> Unit: g/kg body weight



## Physico-chemical properties

The A logP values express the degree of lipophilicity of the chemical compound, where the LogD values express the degree of lipophilicity of the chemical compound taking into account the ionization states of the molecule <sup>3</sup>. An increase in these values indicates an increase in the lipophilic character of the tested compound. It is worthwhile to note that the A log P and LogD values for most compounds in acceptable range for oral and intestinal absorption (1.44–4.74) <sup>4</sup>.

In addition, the molecular polar surface area (MPSA) is another key property linked to drug bioavailability; the passively absorbed molecules with MPSA >140 have low oral bioavailability <sup>5</sup>. All examined compounds showed acceptable values of MPSA less than 140 except compounds **15d**, **15**, **17d** and **18**. Moreover, molecular volume (M.V) descriptor determines transport characteristics of molecules, such as intestinal absorption <sup>6</sup>. The drug diffusivity is inversely proportional to the molecular volume. Molecules with lower MV have higher diffusivity <sup>7</sup>. It was observed that the tested compounds exhibited low molecular volume values (from 315.21 to 353.63) when compared with sorafenib (MV = 323.1).

Finally, Lipinski rule of five was applied for the synthesized compounds. It was found that all the compounds have molecular weight less than 500, hydrogen bond acceptor groups less than 10 except compounds **17d** and **18**, and hydrogen bond donor group less than 5. this indicates that most of the synthesized compounds are likely to be orally bioavailable (**Table 3**).

**Table 3:** Physico-chemical properties of the synthesized compounds and sorafenib.

| Comp.      | ALog P <sup>a</sup> | Log D <sup>b</sup> | MPSA <sup>c</sup> | MSA <sup>d</sup> | MV <sup>e</sup> | HBA <sup>f</sup> | HBD <sup>g</sup> | M. WT <sup>h</sup> |
|------------|---------------------|--------------------|-------------------|------------------|-----------------|------------------|------------------|--------------------|
| <b>15a</b> | 3.83                | 3.83               | 109.28            | 426.2            | 330.3           | 6                | 2                | 408.517            |
| <b>15b</b> | 4.74                | 4.74               | 109.28            | 444.39           | 339.56          | 6                | 2                | 462.951            |
| <b>15c</b> | 3.83                | 3.24               | 129.51            | 434.98           | 336.82          | 7                | 3                | 444.506            |
| <b>15d</b> | 3.73                | 3.48               | 175.33            | 472.83           | 353.28          | 10               | 3                | 489.503            |
| <b>16</b>  | 3.09                | 3.05               | 158.61            | 471.6            | 362.2           | 9                | 4                | 487.53             |
| <b>17a</b> | 2.21                | 2.21               | 90.87             | 412.18           | 315.21          | 7                | 2                | 392.451            |
| <b>17b</b> | 3.12                | 3.12               | 90.87             | 430.37           | 328.25          | 7                | 2                | 446.886            |
| <b>17c</b> | 2.21                | 1.62               | 111.1             | 420.96           | 325.5           | 8                | 3                | 428.44             |
| <b>17d</b> | 2.11                | 1.86               | 156.91            | 458.8            | 342.99          | 11               | 3                | 473.438            |
| <b>18</b>  | 1.47                | 1.44               | 140.19            | 457.57           | 353.63          | 10               | 4                | 471.465            |

|                  |      |      |       |       |       |   |   |         |
|------------------|------|------|-------|-------|-------|---|---|---------|
| <b>Sorafenib</b> | 4.17 | 4.17 | 92.35 | 434.9 | 323.1 | 7 | 3 | 464.825 |
|------------------|------|------|-------|-------|-------|---|---|---------|

<sup>a</sup> Log of the octanol-water partition coefficient

<sup>b</sup> The octanol-water partition coefficient calculated taking into account the ionization states of the molecule

<sup>c</sup> Molecular surface area: Calculates the total surface area for each molecule using a 2D approximation.

<sup>d</sup> Molecular polar surface area: calculates the polar surface area for each molecule using a 2D approximation.

<sup>e</sup> Molecular volume: calculates the 3D volume for each molecule using the current 3D coordinates.

<sup>f</sup> Hydrogen bond donor atoms

<sup>g</sup> Hydrogen bond acceptor atoms

<sup>h</sup> Molecular weight

---

### DFT studies

Discovery studio software was used to carry out density functional theory (DFT) calculations. Different molecular and atomic properties were calculated including **i**) total energy of the molecules, **ii**) binding energy which describes the interaction energy between all the atoms in the molecule, **iii**) the energy of the highest occupied molecular orbital (HOMO), **iv**) the energy of the lowest unoccupied molecular orbital (LUMO), gap energy which describes the energy difference between LUMO and HOMO, **v**) the magnitude of the dipole moment ( $\mu$ ).

The results (**Table 4**) revealed that the total energies of the tested compounds and sorafenib have negative values which are favorable for spontaneous binding and interaction. In addition, compounds **15b**, **15d**, **16**, **17b**, **17c**, **17d**, and **18** have dipole moment values very close to that of sorafenib. The improved dipole moment can enhance hydrogen bond and non-bonded interactions in drug receptor complexes which keep an important role to increase binding affinity. Elevated dipole moment indicated the increased binding affinity with target enzyme during VEGFR-2 inhibitory activities.

### Molecular orbital analysis

According to the frontier molecular orbital theory, the energies of HOMO and LUMO play an important role in chemical reactivity <sup>8</sup>. It was evident that compounds **15a**, **15b**, **17a**, **17b**, **17c**, and **18** have gap energy values very close to that of sorafenib. **Fig. 9** showed the spatial distribution of molecular orbitals for sorafenib and the most promising members (**15b** and **17b**).

**Table 4.** Thermodynamic parameters of the synthesized compounds and sorafenib.

| Name             | Total Energy (kcal/mol) | Binding Energy (kcal/mol) | HOMO Energy (kcal/mol) | LUMO Energy (kcal/mol) | Gap Energy | $\mu$ |
|------------------|-------------------------|---------------------------|------------------------|------------------------|------------|-------|
| <b>15a</b>       | -1608.474               | -10.462                   | -0.200                 | -0.107                 | 0.093      | 0.530 |
| <b>15b</b>       | -2139.791               | -10.576                   | -0.200                 | -0.107                 | 0.093      | 2.365 |
| <b>15c</b>       | -1756.361               | -10.806                   | -0.183                 | -0.106                 | 0.077      | 1.220 |
| <b>15d</b>       | -1959.422               | -11.164                   | -0.205                 | -0.132                 | 0.074      | 4.484 |
| <b>16</b>        | -1923.712               | -11.558                   | -0.199                 | -0.122                 | 0.077      | 2.095 |
| <b>17a</b>       | -1286.345               | -10.666                   | -0.190                 | -0.094                 | 0.097      | 1.734 |
| <b>17b</b>       | -1817.724               | -10.717                   | -0.201                 | -0.103                 | 0.098      | 3.061 |
| <b>17c</b>       | -1434.226               | -11.008                   | -0.175                 | -0.093                 | 0.082      | 2.298 |
| <b>17d</b>       | -1637.285               | -11.367                   | -0.196                 | -0.124                 | 0.072      | 4.801 |
| <b>18</b>        | -1601.579               | -11.769                   | -0.192                 | -0.095                 | 0.097      | 2.520 |
| <b>Sorafenib</b> | -2000.377               | -9.866                    | -0.200                 | -0.091                 | 0.109      | 3.088 |

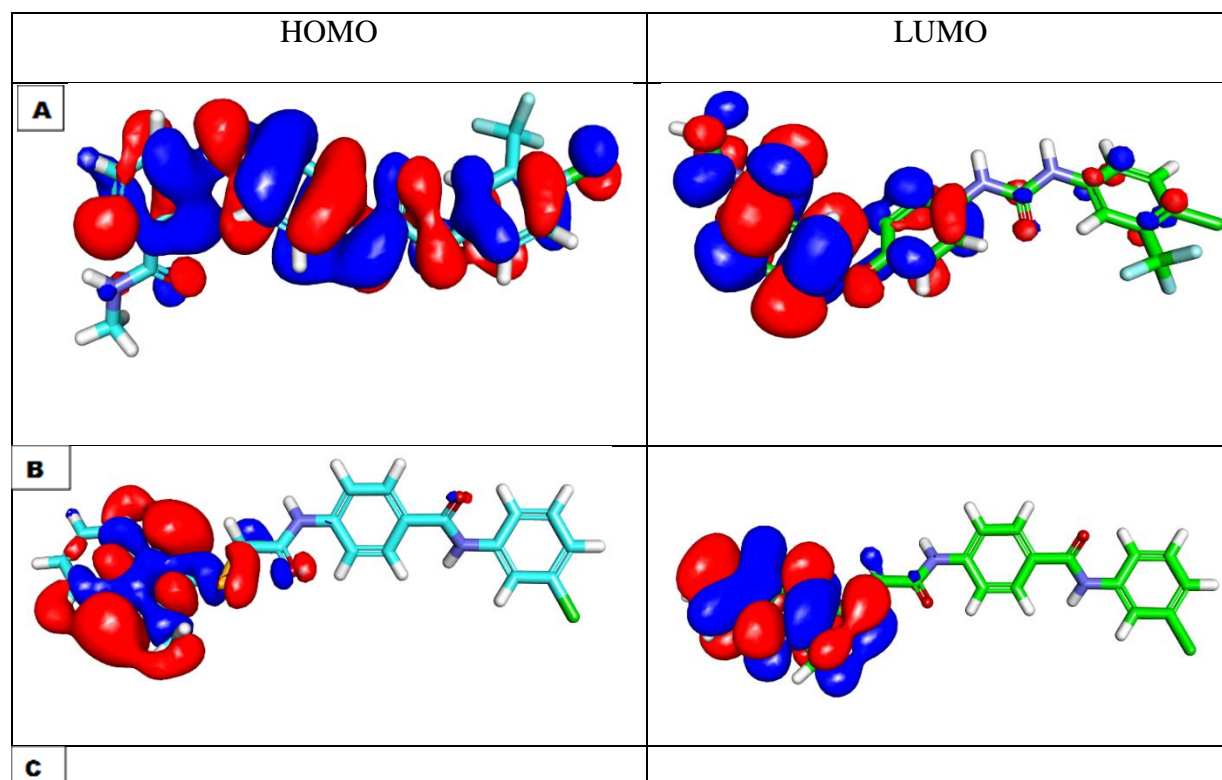

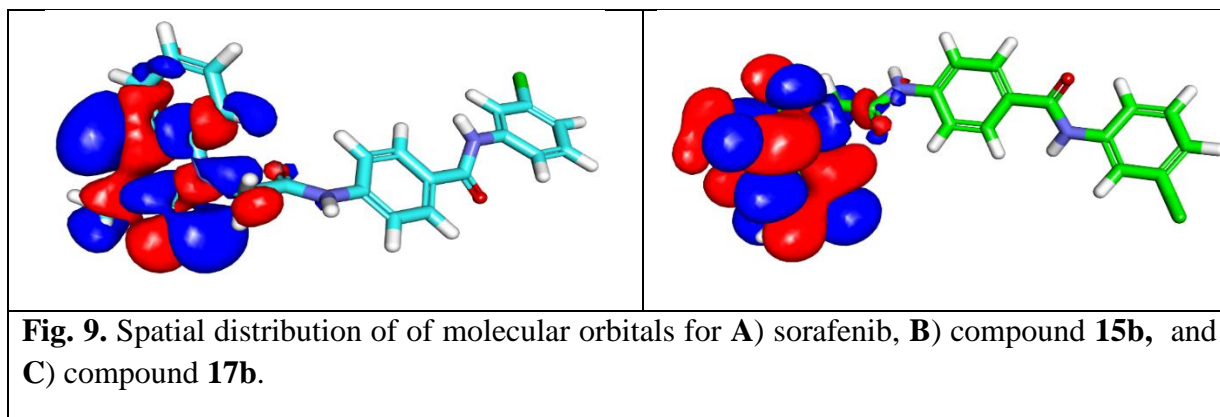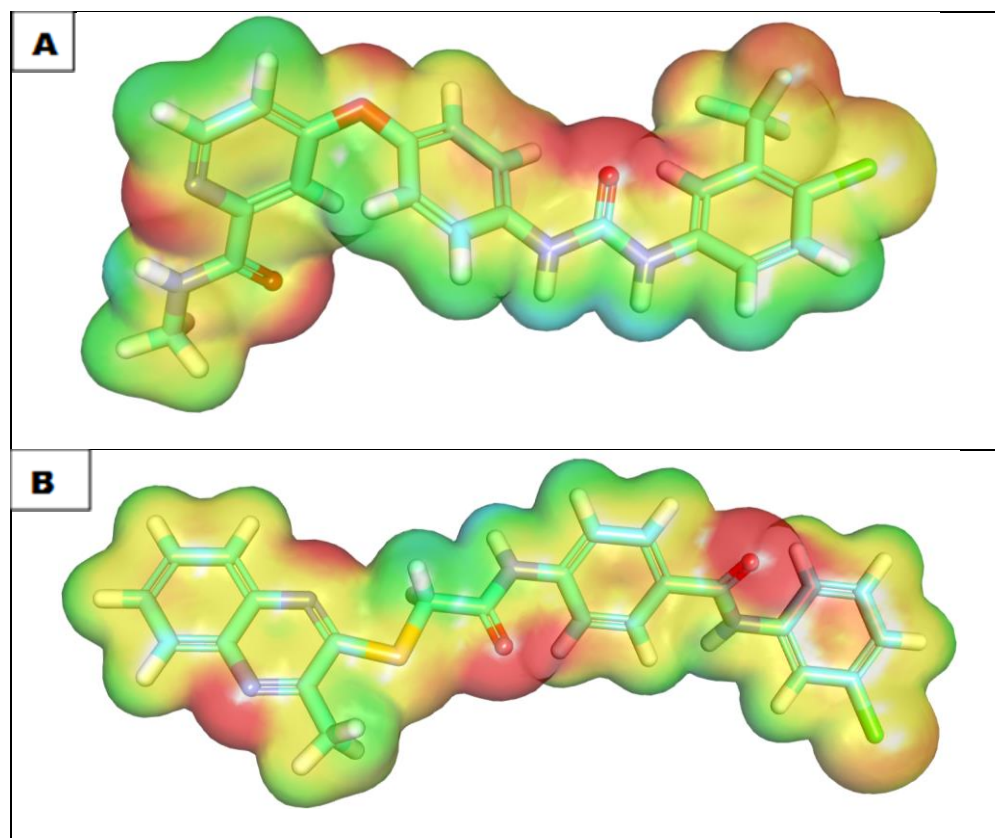

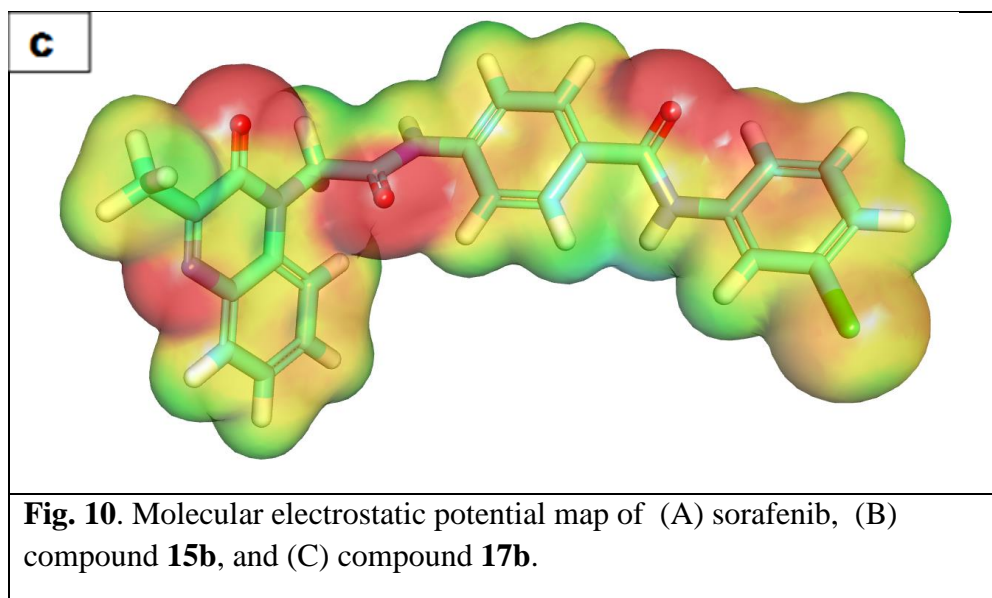

## Experimental section

### 1. Chemistry

All solvents and reagents were commercially available and used without further purification. Reactions progression were monitored by TLC sheets coated with UV fluorescent silica gel (Kieselgel 0.25mm, 60 F254, Merck Germany) and were visualized using UV lamp. The melting points were determined using a Gallen lamp melting point apparatus. Elemental analyses were accomplished using a CHN analyzer. The infrared spectra were recorded on FT/IR-6600typeA spectrophotometer.  $^1\text{H}$  NMR spectra were recorded at 400 and 700 MHz, while  $^{13}\text{C}$  NMR spectra were run at 100 and 176 MHz, on a Bruker Avance NEO-600 equipped with a 1.7 mm TCI CryoProbe. Chemical shifts were expressed in  $\delta$  (ppm) with reference to TMS and coupling constant (J) in Hertz using DMSO- $d_6$  and  $\text{CDCl}_3$ - $d_6$  as solvents. The mass spectra were recorded on an Agilent 6410 triple-quadrupole mass spectrometer equipped with an ESI source.

### 2. Biological testing

#### *In vitro* anti-proliferative activity

Anti-proliferative activity screening of the newly synthesized compounds was carried out against two human cancer cell lines namely, breast cancer (MCF-7) and Hepatocellular carcinoma (HepG-2). The cell lines were obtained from ATCC (American Type Culture Collection) via the Holding company for biological products and vaccines (VACSERA) (Cairo, Egypt). The anti-cancer activity was measured quantitatively using MTT assay protocol. Cell lines were cultured in

RPMI-1640 medium with 10% fetal bovine serum. Antibiotics added were 100 units/ml penicillin and 100 µg/ml streptomycin at 37°C in a 5% CO<sub>2</sub> incubator. The cell lines were seeded in a 96-well plate at a density of 1.0 x 10<sup>4</sup> cells / well at 37 °C for 48 h under 5% CO<sub>2</sub>. After incubation, the cells were treated with different concentration of synthesized compounds and incubated for 24 h. After 24 h of drug treatment, 20 µl of MTT solution at 5mg/ml was added and incubated for 4 h. Dimethyl sulfoxide (DMSO) in volume of 100 µl was added into each well to dissolve the purple formazan formed. The colorimetric assay was measured and recorded at absorbance of 570 nm using a plate reader (EXL 800, USA). The relative cell viability in percentage was calculated as (A<sub>570</sub> of treated samples/A<sub>570</sub> of untreated sample) X 100. Results for IC<sub>50</sub> values of the active compounds were summarized in **Table 1**.

---

#### ***In vitro* VEGFR-2 kinase assay**

Inhibitory activity of the newly synthesized compounds against VEGFR-2 was evaluated using Human VEGFR-2 ELISA kit (Enzyme-Linked Immunosorbent Assay). A specific antibody for VEGFR-2 was seeded on a 96-well plate and 100 µL of the standard solution or the tested compound was added, all were incubated at room temperature for 2.5 hours. Then washed, 100 µL of the prepared biotin antibody was added, then incubated at room temperature for additional 1 hour. Washed, 100 µL of streptavidin solution was added then incubated for 45 min. at room temperature. Washed again, 100 µL of TMB Substrate reagent was added and incubated for 30 min. at room temperature. 50 µL of the stop solution was added, then read at 450 nm immediately. The standard curve was drawn, concentrations on the X-axis and the absorbance on the Y-axis.

---

#### **Cell cycle analysis**

HepG-2 cells were seeded and incubated for 24 h in six-well plates each one contains 2 x 10<sup>5</sup> cells per well. Fetal bovine serum (FBS, 10%) was added, after that cells were incubated at 37°C and 5% CO<sub>2</sub>. The medium was replaced with (DMSO 1% v/v) containing the 2.5 µM of compound **17b**, then incubated for 48 h, washed with cold phosphate buffered saline (PBS), fixed with 70% ethanol, rinsed with PBS then stained with the DNA fluorochrome PI, kept for 15 min at 37°C. Then samples were analyzed with a FACS Caliber flow cytometer.

---

#### **Annexin V-FITC apoptosis assay**

Annexin V-FITC/PI apoptosis detection kit was used for this investigation, **HepG-2** cells were stained with Annexin V fluorescein isothiocyanate (FITC) and counterstained with propidium iodide (PI). 2 x 10<sup>5</sup> of HepG-2 cells were incubated with compound **17b** for 48 h, trypsinized,

washed with phosphate-buffered saline (PBS), stained for 15 min at 37°C in the dark. Then, analyzed with FACS Caliber flow cytometer.

### Induction of apoptosis

In this test HepG-2 cells were treated with compound **17b** (2.3 μM) and analyzed for apoptosis using flowcytometry technique <sup>9</sup>. The obtained results showed that compound **17b** induced early apoptosis (35.80%) by more than 4-fold over the control (8.22%) **Table 3** and **Fig. 4**.

**Table 3:** Effect of compound **17b** on stages of the cell death (HepG-2).

| Sample             | Viable <sup>a</sup><br>(Left Bottom) | Apoptosis <sup>a</sup>  |                     | Necrosis <sup>a</sup><br>(Left Top) |
|--------------------|--------------------------------------|-------------------------|---------------------|-------------------------------------|
|                    |                                      | Early<br>(Right Bottom) | Late<br>(Right Top) |                                     |
| HepG-2             | 91.44 ± 2.55                         | 8.22 ± 0.61             | 0.26 ± 0.04         | 0.11 ± 0.03                         |
| <b>17b /HepG-2</b> | 63.45 ± 3.18                         | 35.80 ± 3.18**          | 0.52 ± 0.09         | 0.20 ± 0.04                         |

<sup>a</sup> Three independent experiments were applied for each value. \*\*p < 0.01.

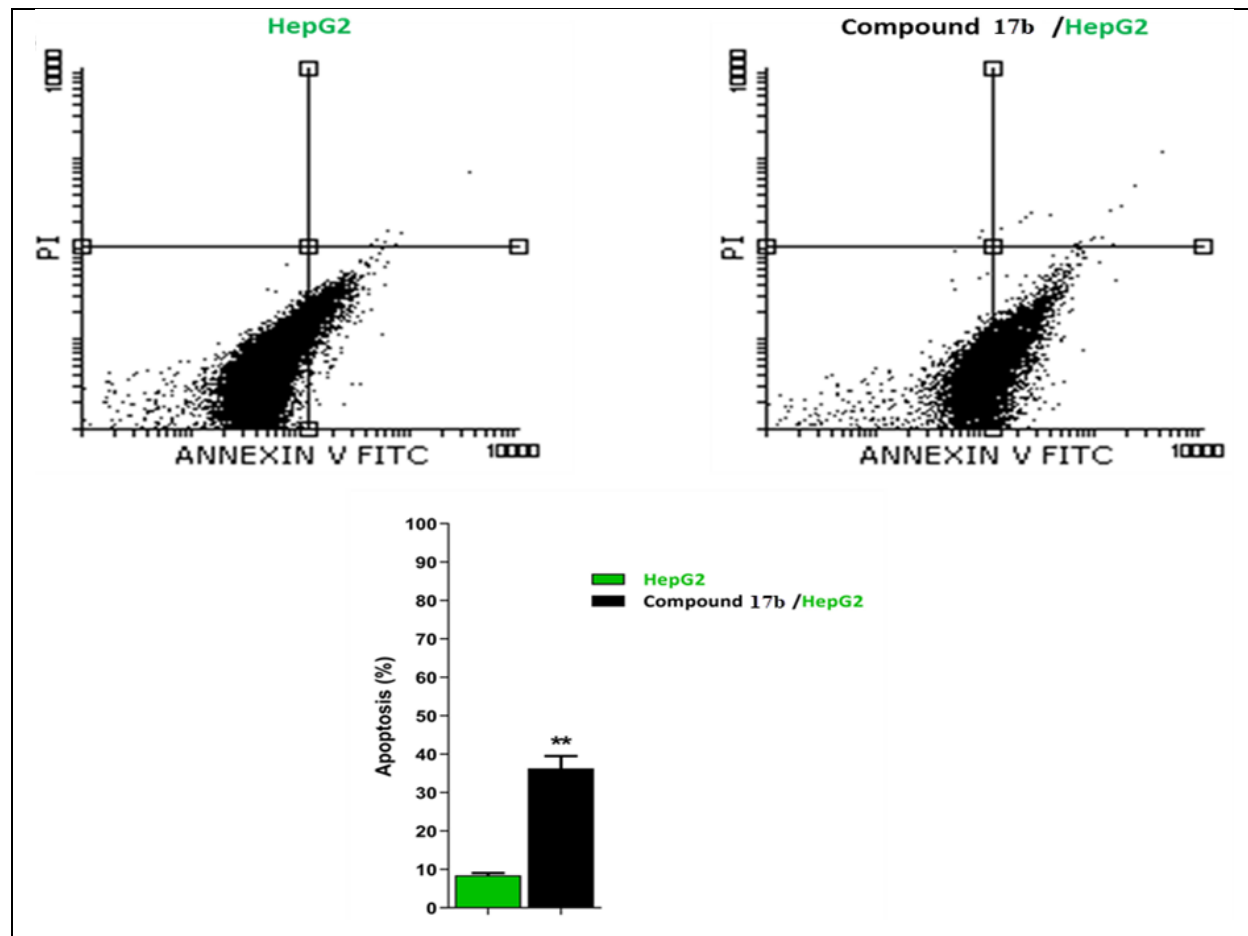

**Fig. 11:** Apoptosis analysis in HepG-2 cells after the treatment with compound **17b**, \*\*p < 0.01.

---

### **Caspase-3, and -9 determination**

The percentage of caspase-3 activation was determined using the Caspase- Invitrogen Caspase-3 ELISA Kit (KHO1091) following the manufacturer's instructions.

---

### **Bax determination (real-time PCR).**

The effect of compound **17b** on *BAX* expressions was determined at concentrations of 6.71, 8.68, 46.43, 4.55, and 3.43  $\mu\text{g/mL}$ , respectively after 48 h of treatment on HepG-2 cells, using real-time PCR. The expression level of *BAX* was determined using a SYBR Green qRT-PCR kit (Bioneer, Daejeon, Korea) according to the manufacturer's protocol. PCR reactions were performed using specific primers for *BAX*. *BAX* forward primer: 5'-GCCCTTTTGCTTCAGGGTTT-3'; *BAX* Reverse primer: 5' TCCAATGTCCAGCCCATGAT-3'. The reactions were carried out in triplicate using an Eco Real-Time PCR system (San Diego, CA, USA).

## **3. *In silico* studies**

### **Molecular docking procedures**

Molecular Operating Environment MOE, package version 2014.09 software was used for computational analysis. The crystal structure of VEGFR-2 was downloaded from the Protein Data Bank, <http://www.rcsb.org/pdb> (PDB ID: 2OH4, resolution: 2.05 Å). The crystal structures were imported into MOE, the structure preparation wizard of MOE was used to correct all the issues in protein structures. The water molecules were removed from downloaded protein then subjected to 3D protonation and energy minimization up to 0.01 gradient. Protein was subjected to energy minimization by applying MMFF94 force field, the binding site of the protein was defined and prepared for docking. The final optimized structures were saved in the working directory. Sorafenib and the designed compounds 2D structures were sketched using ChemBioDraw Ultra 14.0 and saved in MDL Molfile format. Next, the Molfile was opened, 3D structures were protonated, and energy minimized by applying MMFF94 force field then prepared for docking by optimizing the parameters, using ASE as score function. A maximum of 10 conformers was considered for each molecule in the docking analysis. After that, the docking scores (S) of the best-fitted conformation of each of the docked molecules with the amino acids at the VEGFR-2 binding pocket were recorded. The obtained compound–receptor complexes were then used to study the predicted ligand-receptor attachments at the target sites and their binding energies.



The same procedure was carried out for the docking studies of the most active compound 17b against cytochrome P450 (PDB ID: 4D7D).

---

#### **ADMET studies**

ADMET descriptors (absorption, distribution, metabolism, excretion and toxicity) of the compounds were determined using Discovery studio 4.0. At first, the CHARMM force field was applied then the tested compounds were prepared and minimized according to the preparation of small molecule protocol. Then ADMET descriptors protocol was applied to carry out these studies.

---

#### **Toxicity studies**

The toxicity parameters of the synthesized compounds were calculated using Discovery studio 4.0. Sorafenib was used as a reference drug. At first, the CHARMM force field was applied then the compounds were prepared and minimized according to the preparation of small molecule protocol. Then different parameters were calculated from toxicity prediction (extensible) protocol.

---

#### **DFT studies:**

The DFT parameters (total energy, binding energy, HOMO, LUMO, gap energy, dipole moment, and electrostatic potential) were calculated using Discovery studio software. the tested compounds were prepared using prepare ligand protocol. Then, the prepared compounds were subjected to DFT calculation protocol using the default option.

15a

drNawaf-F-158.10.fid  
PROTON DMSO {C:\Bruker\TOPSPIN} abari 1

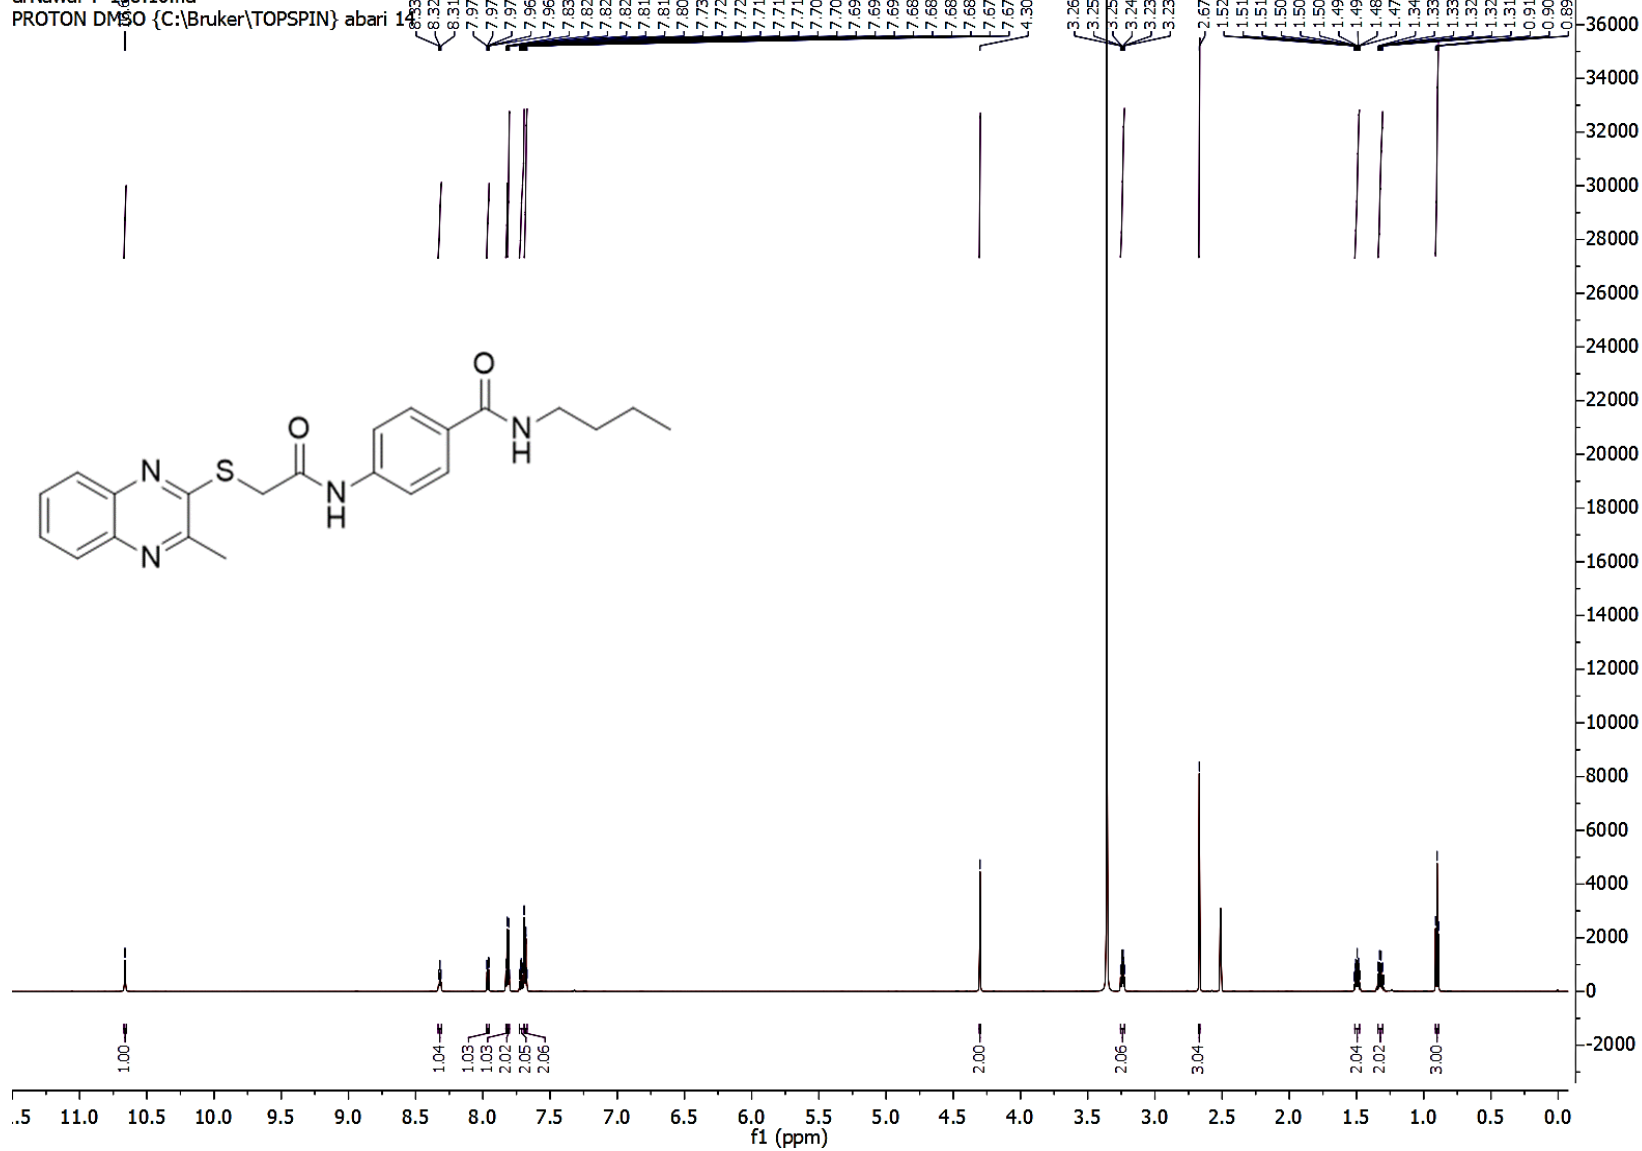

15a

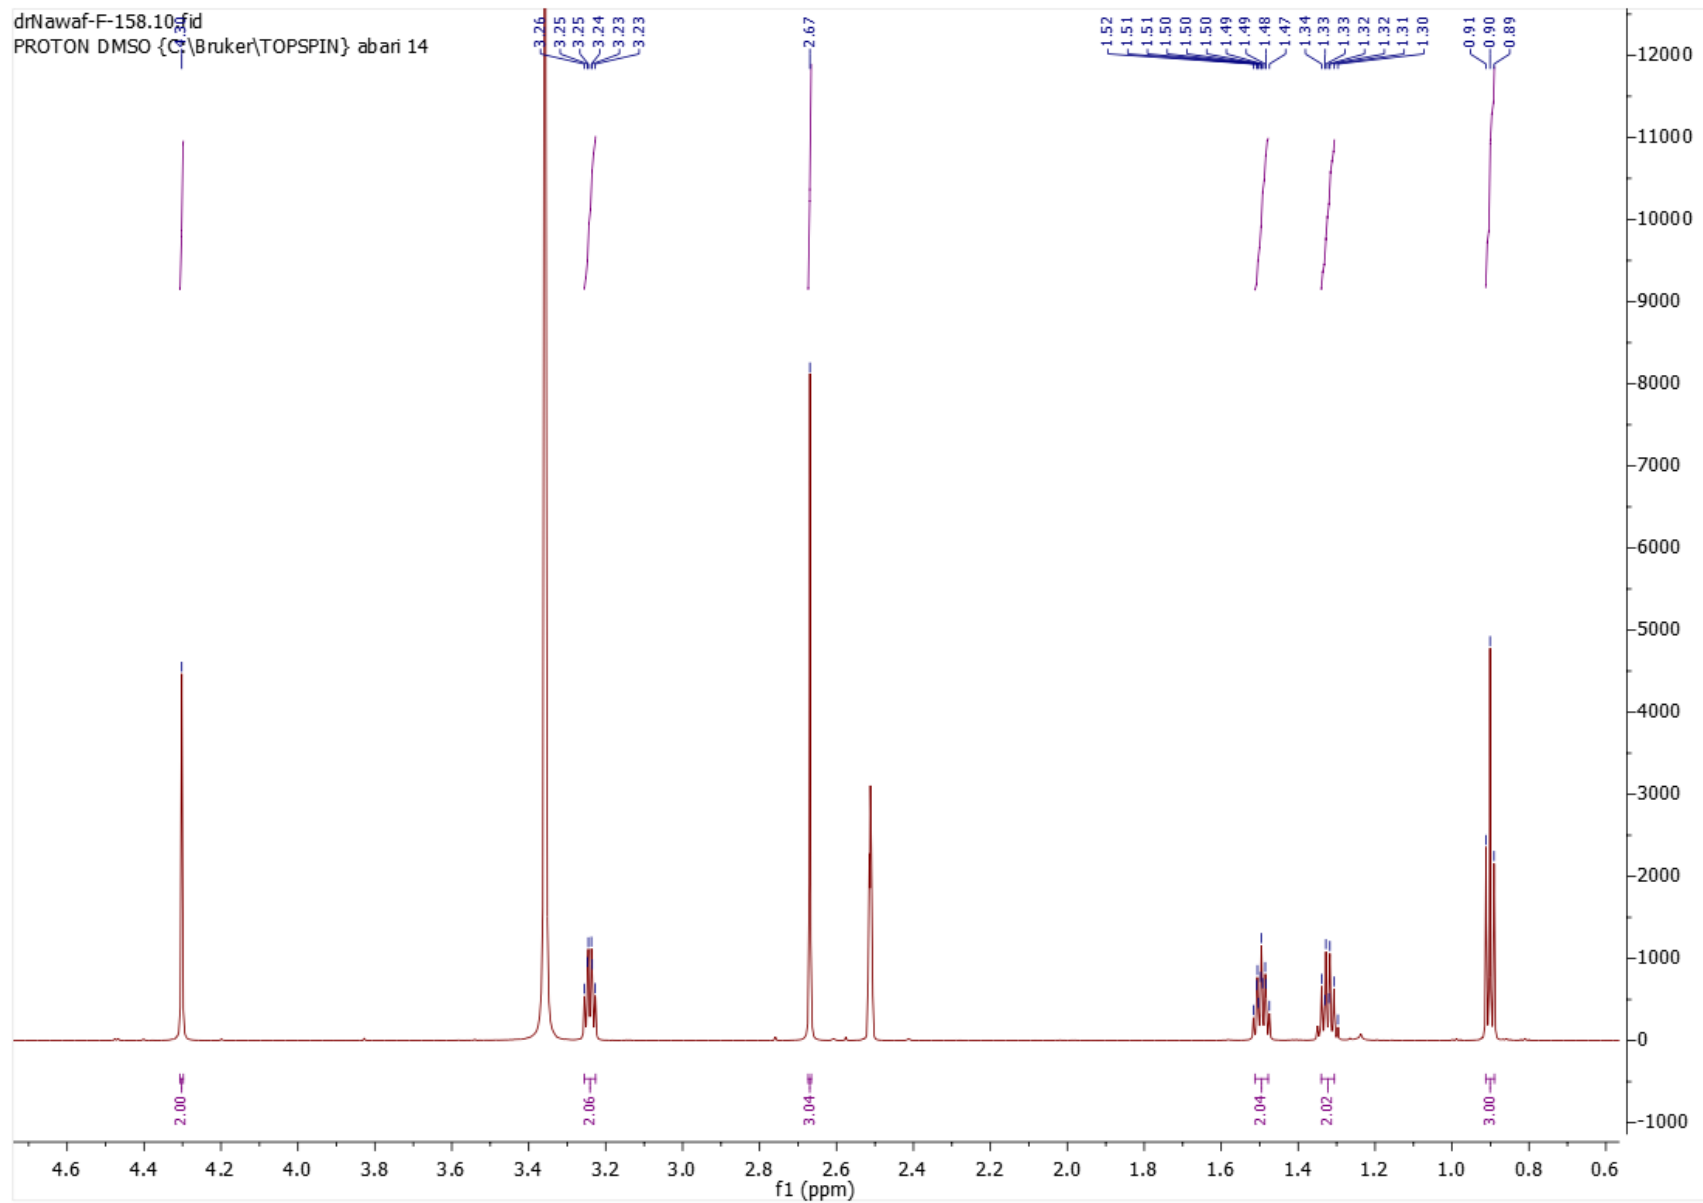

15a

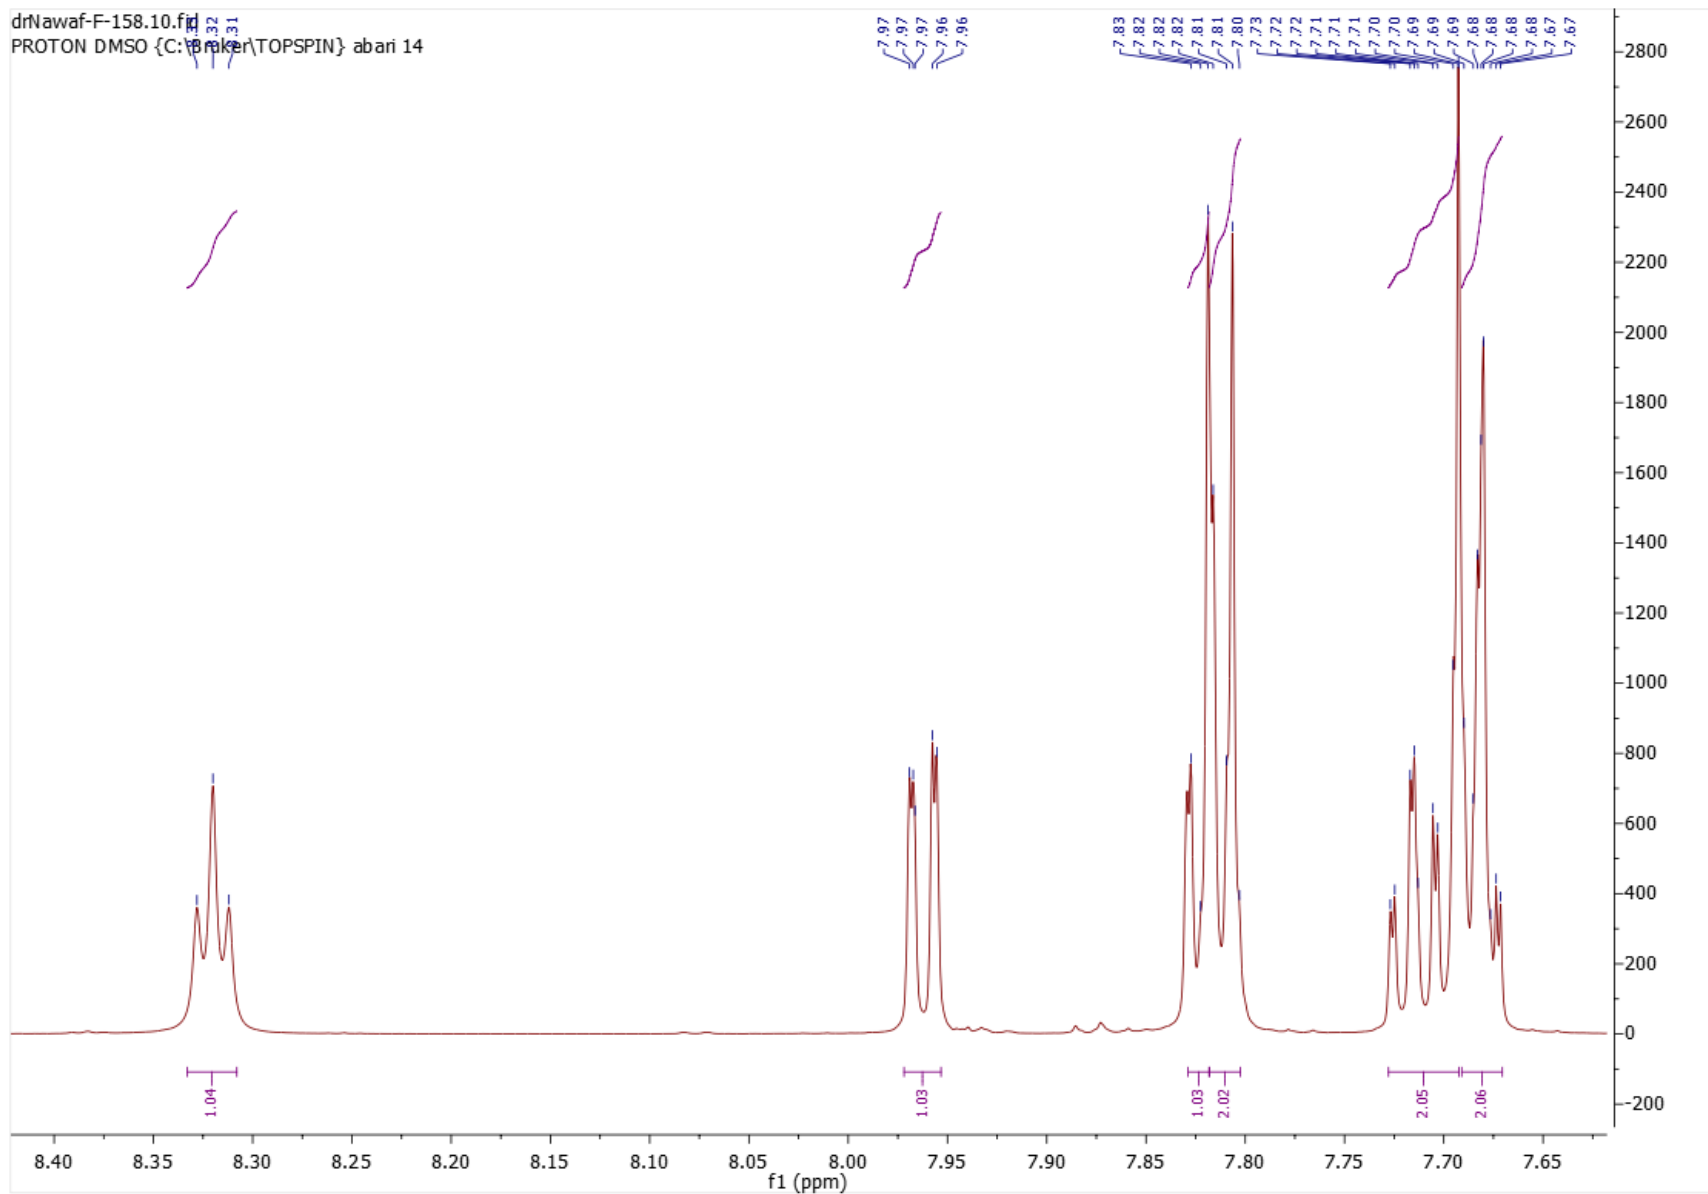

15a

drNawaf-F-158.11.fid  
C13CPD DMSO {C:\Bruker\TOPSPIN} abari 14

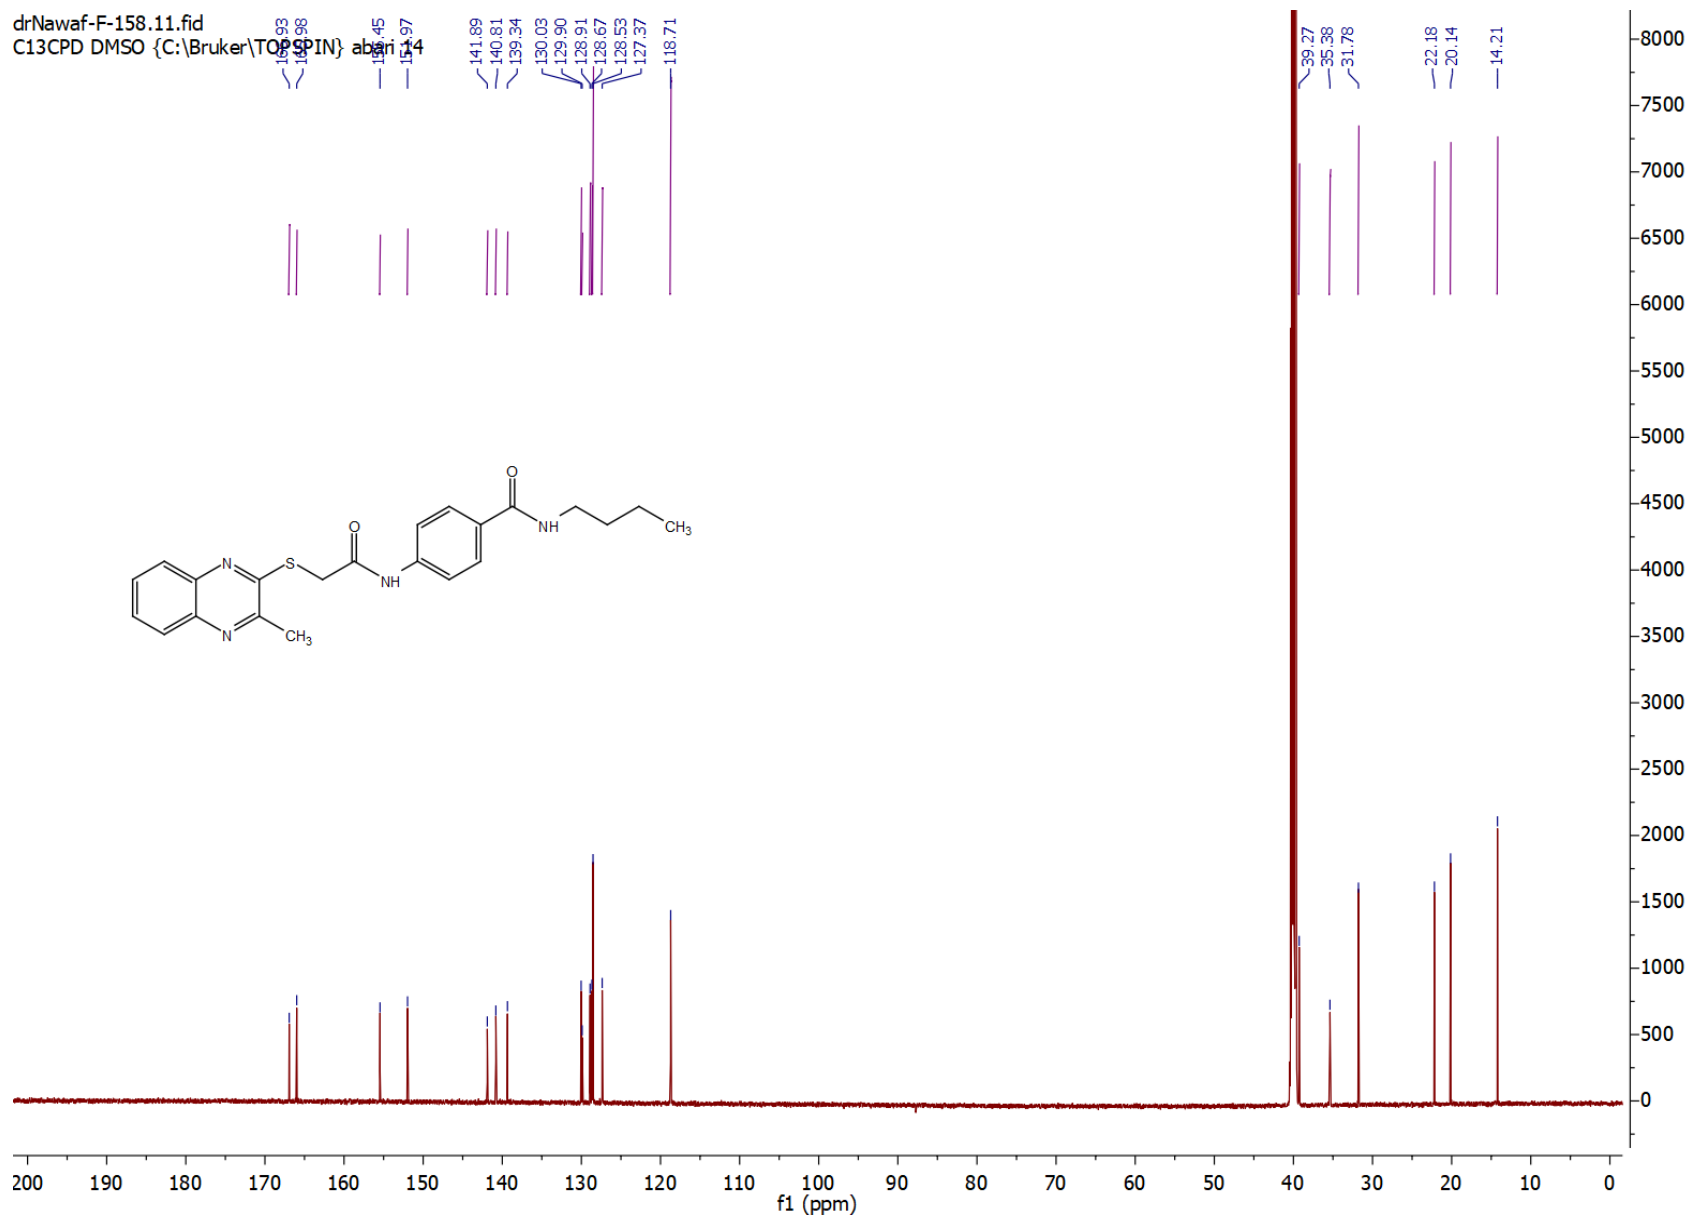

15a

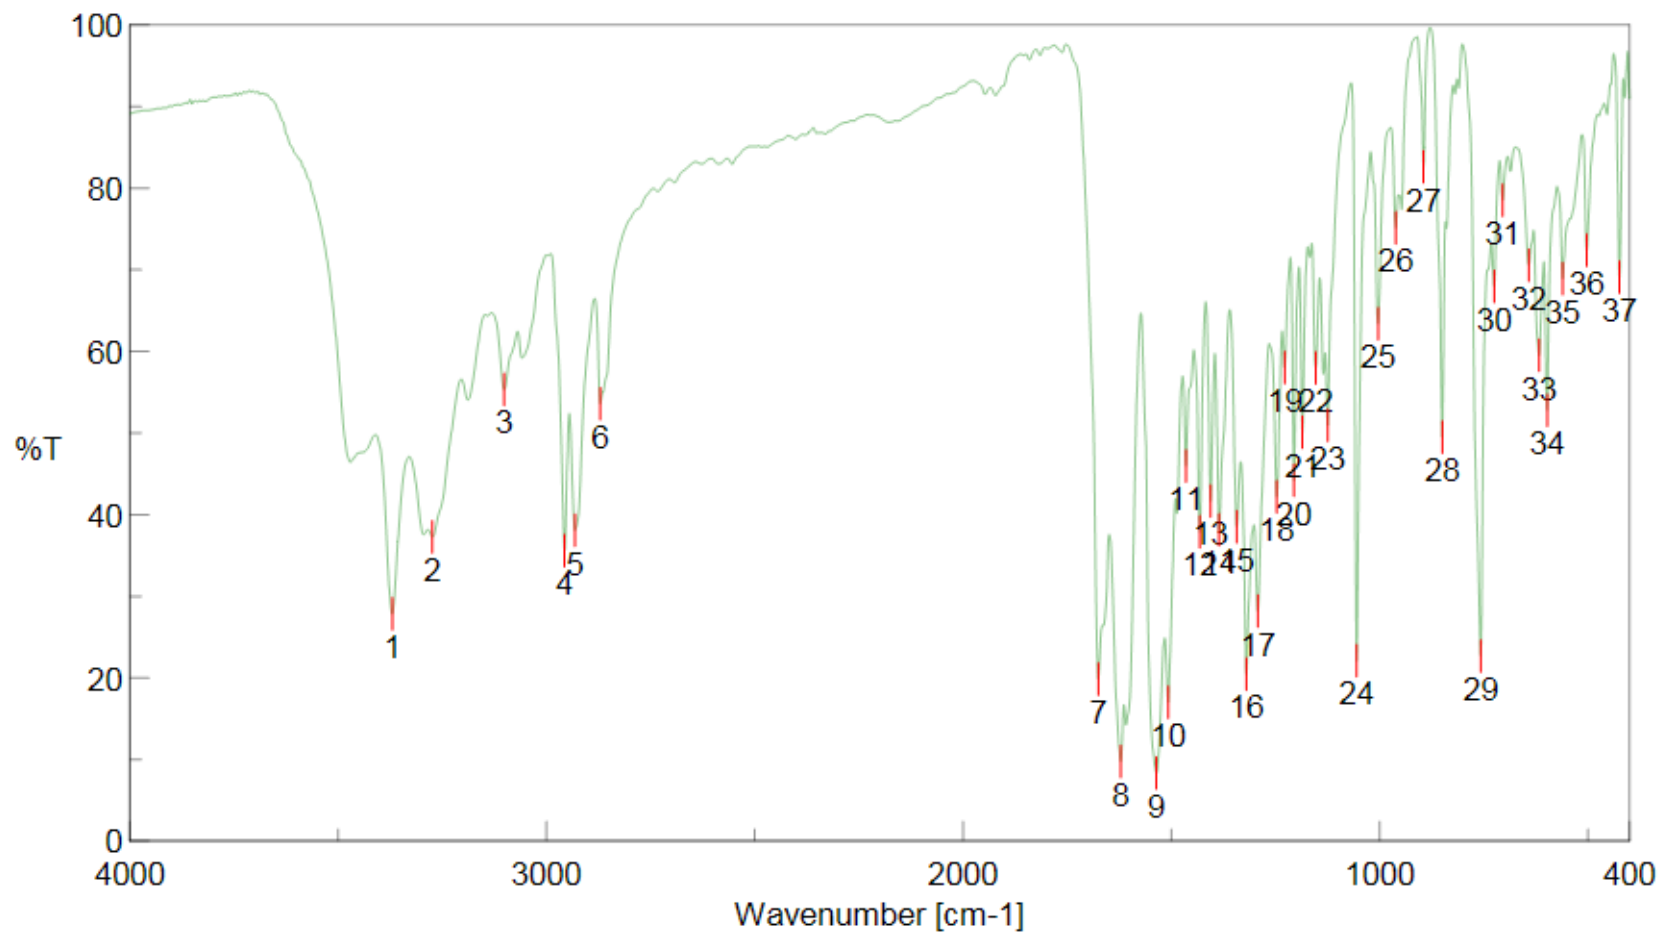

15a

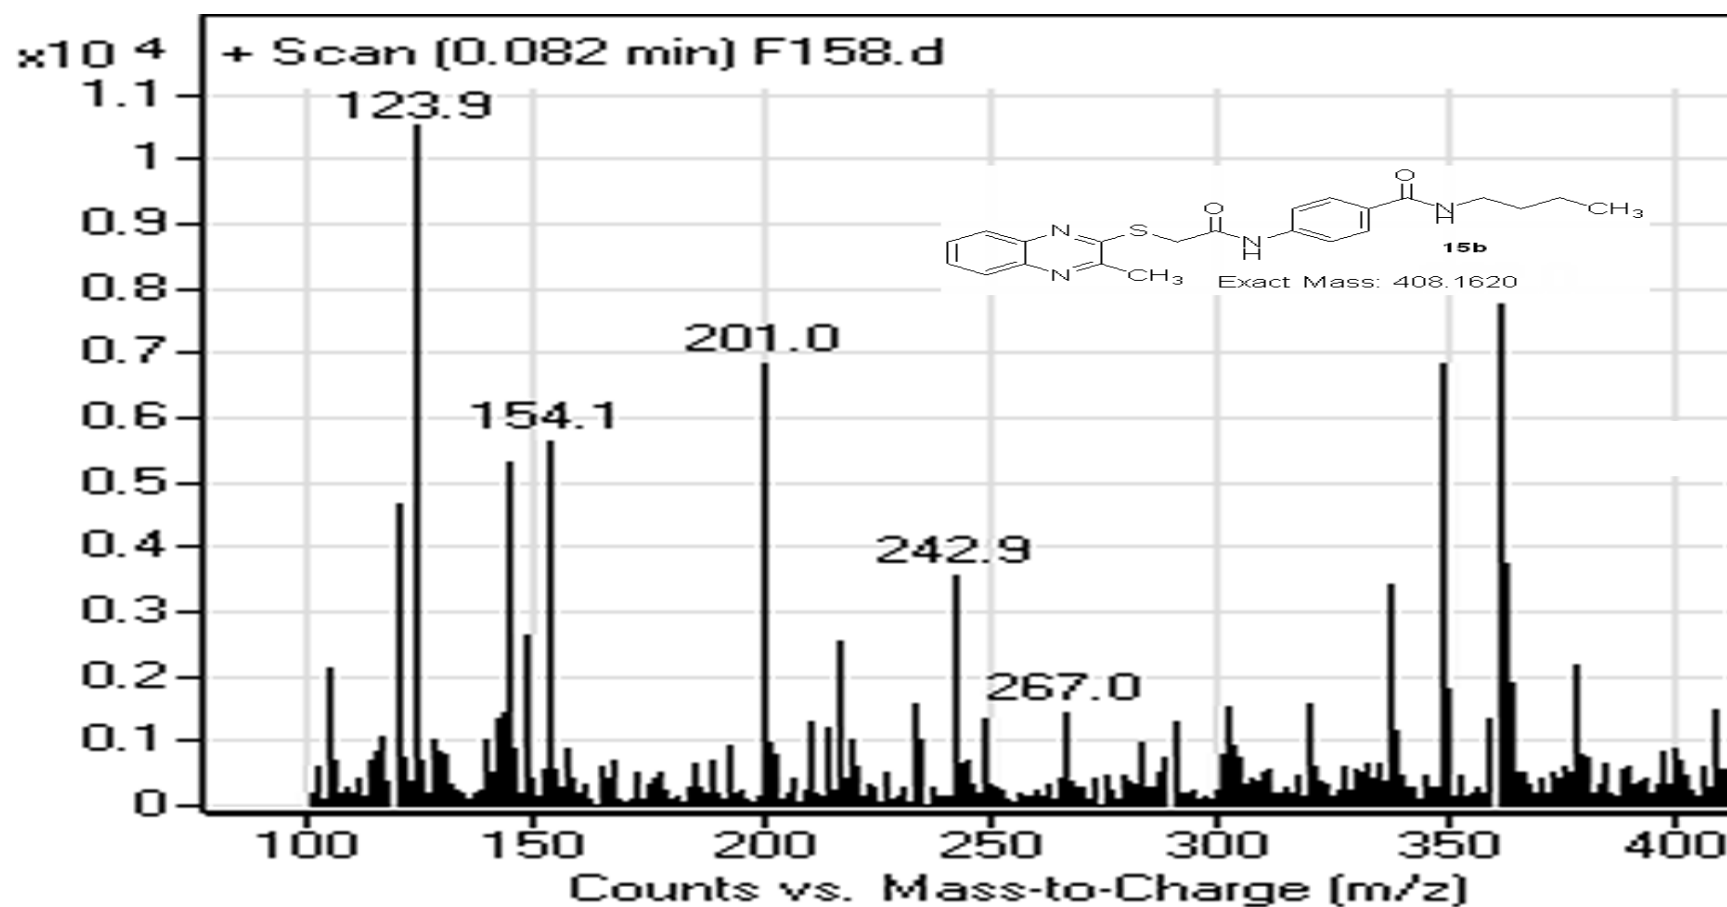

15b

drNawaf-F-154.10.fid  
PROTON DMSO (C. Bruker) TOPSPIN 4.5

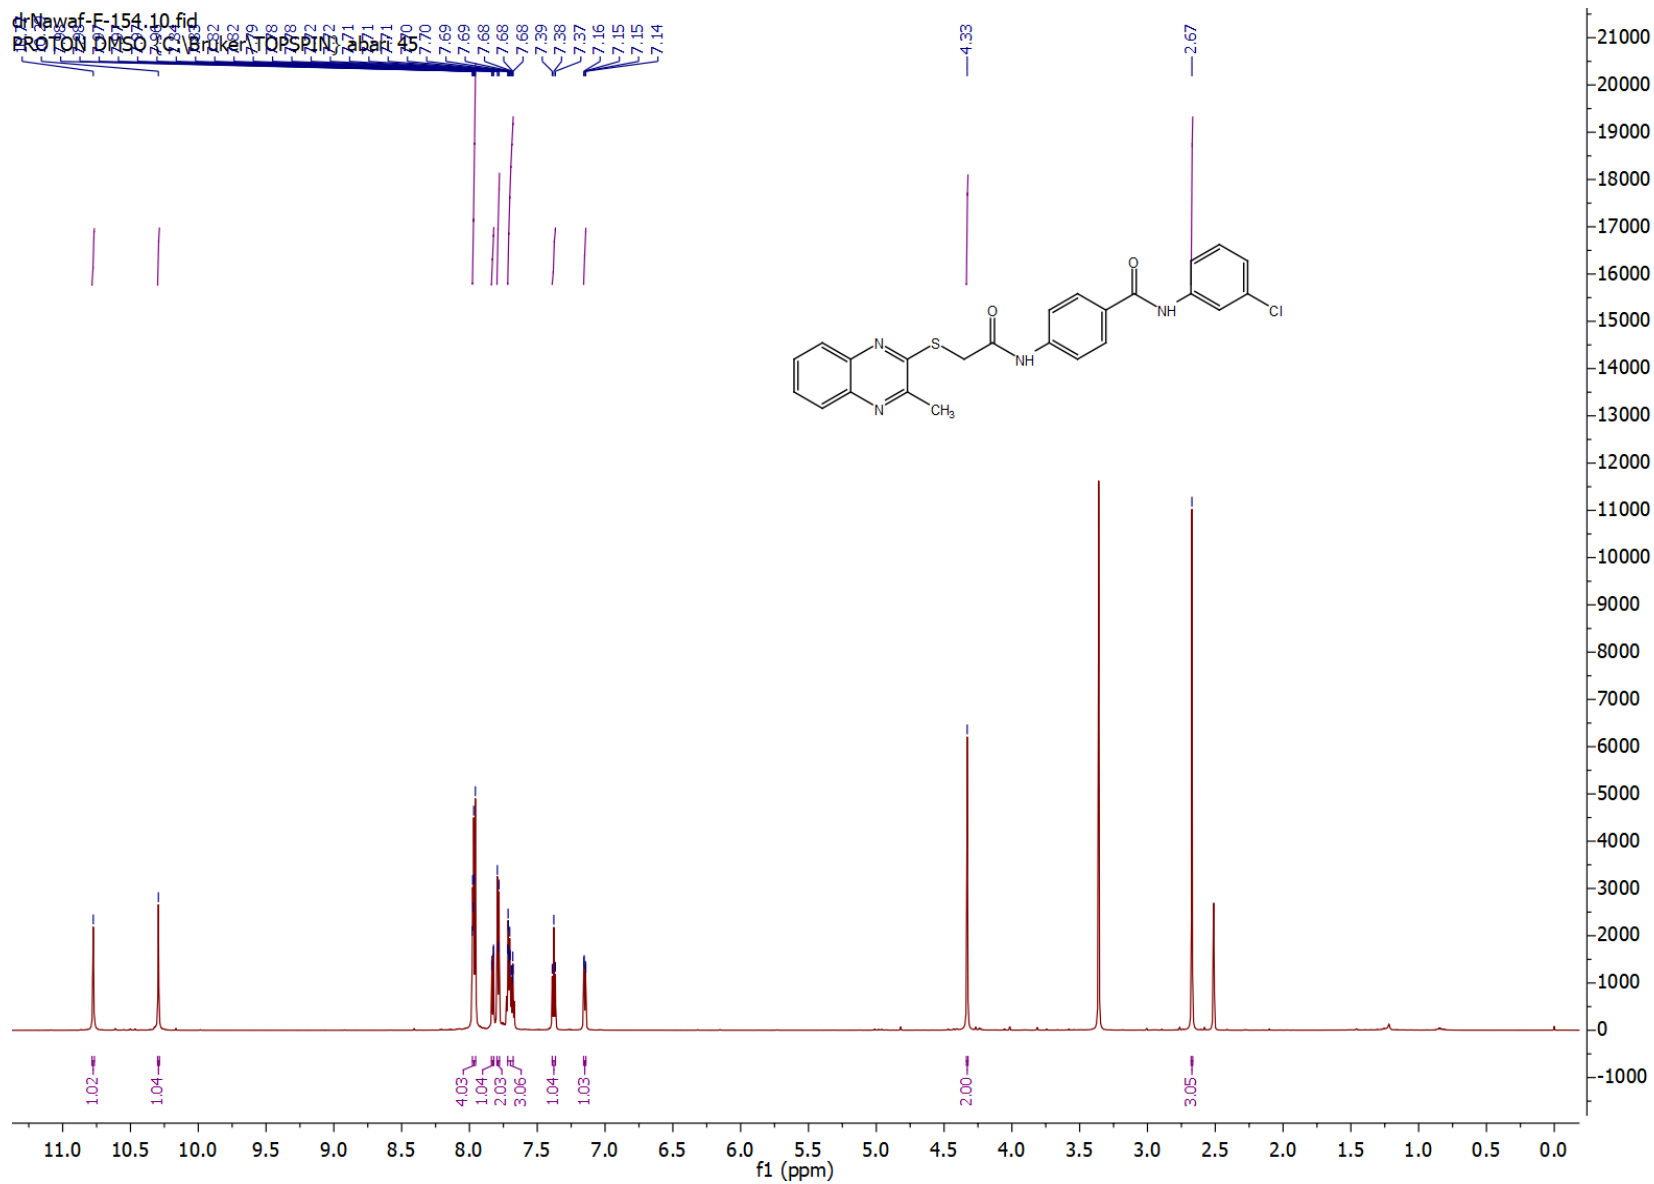



15b

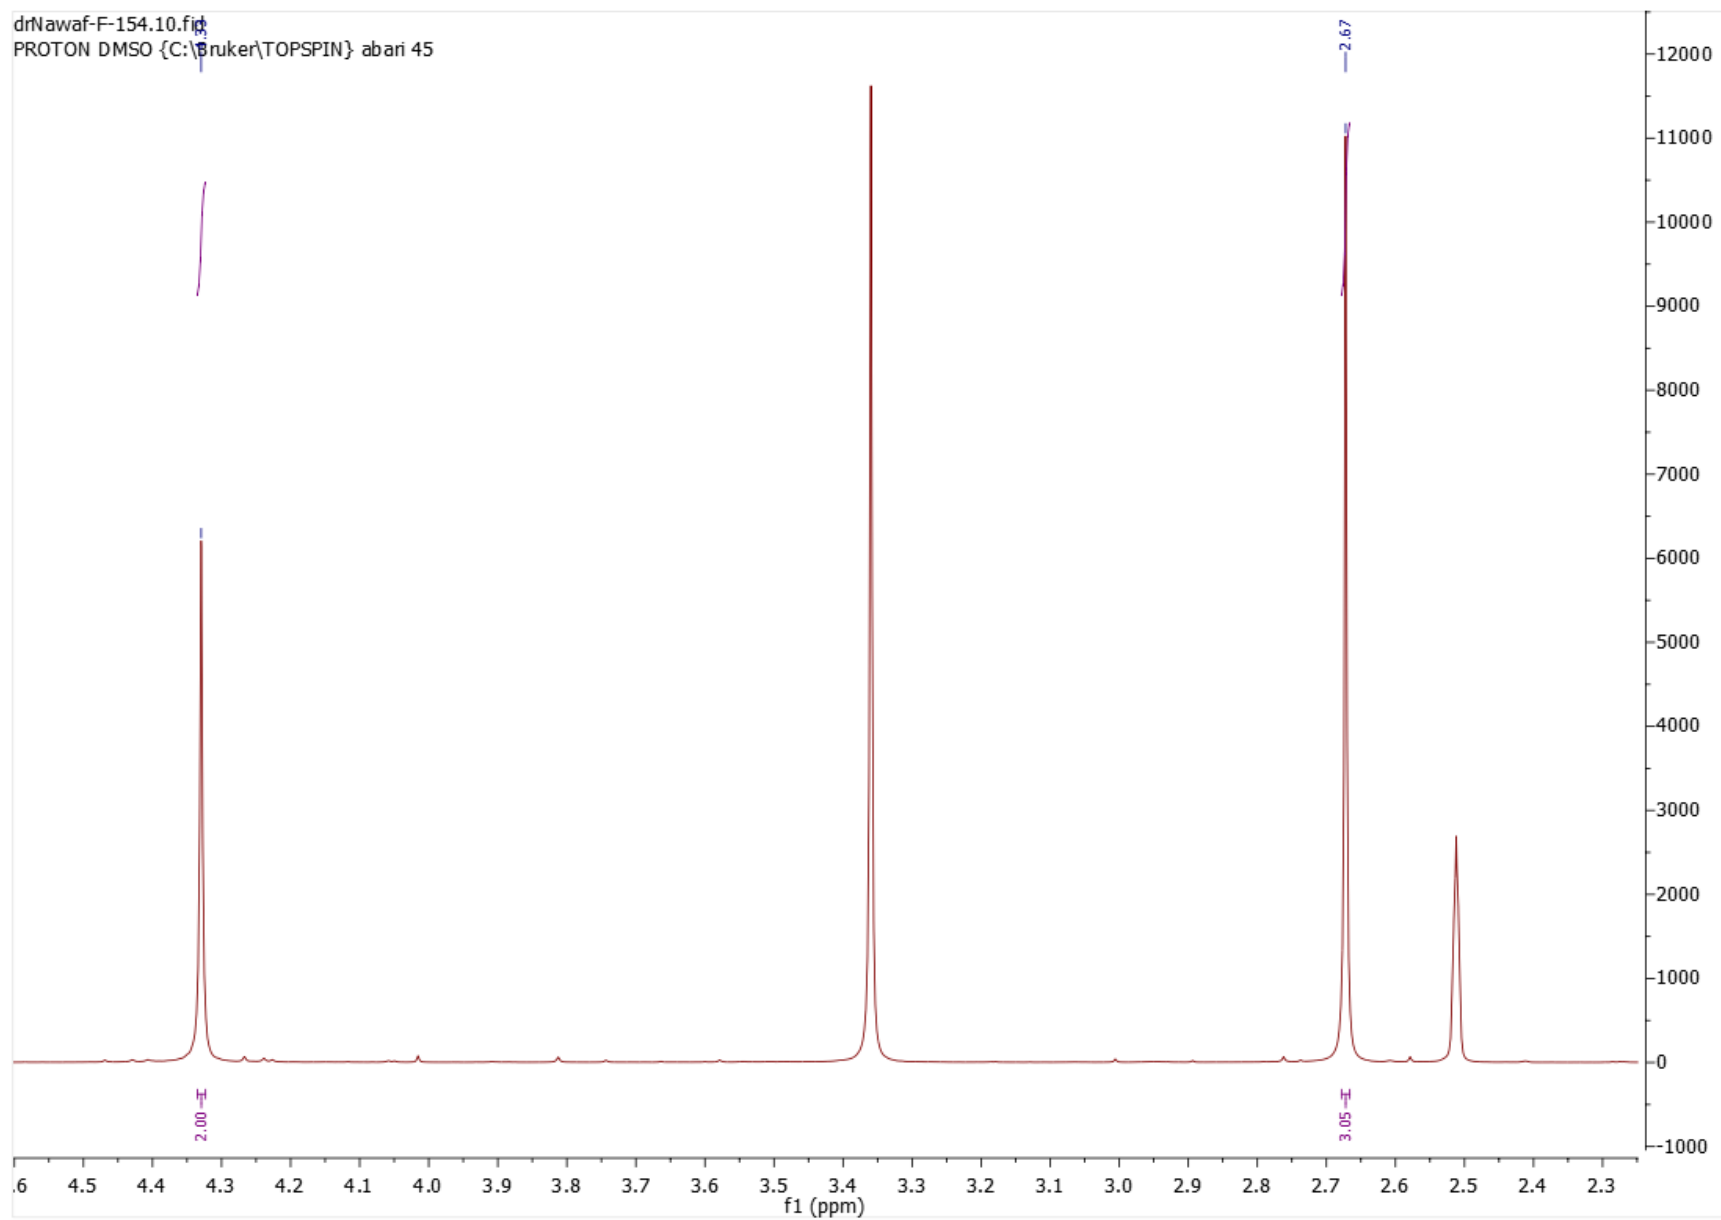

15b

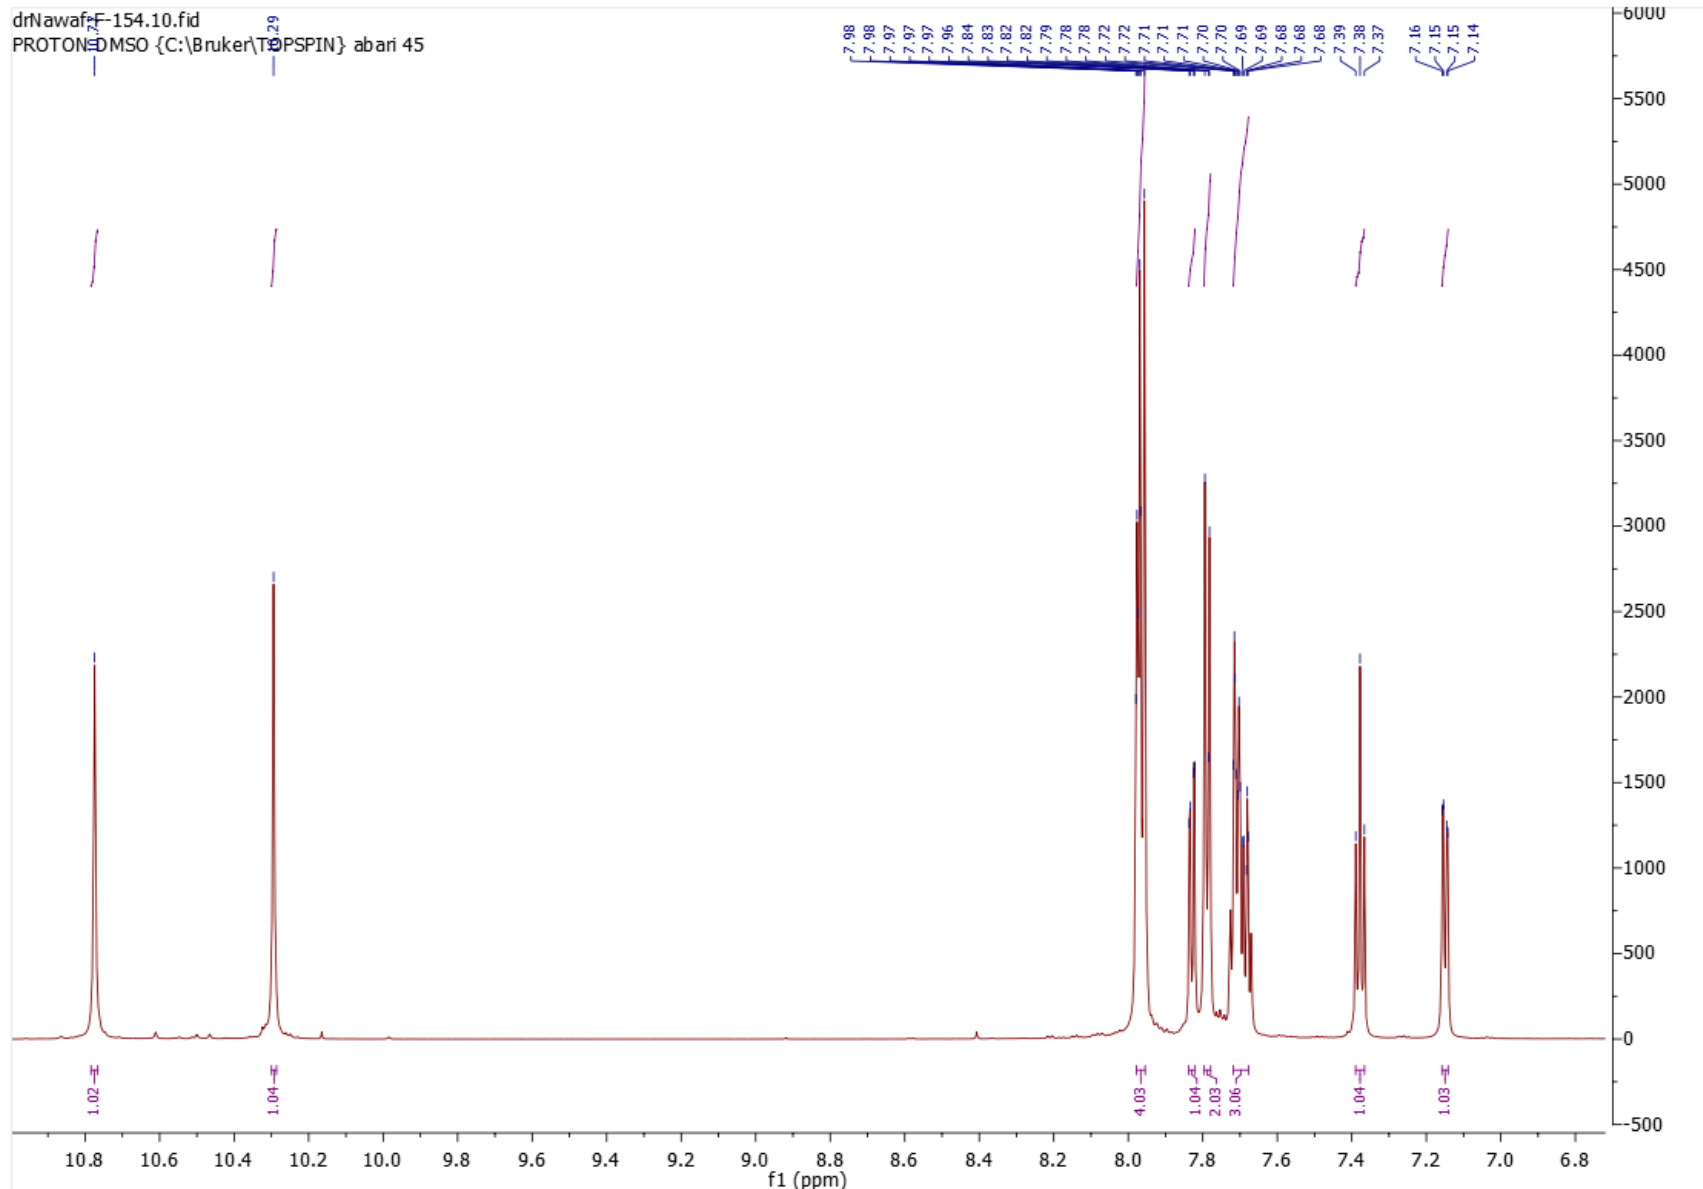

15b

drNawaf-F-154.11.fid  
C13CPD DMSO {C:\Bruker\TOPSPIN} aqart.45

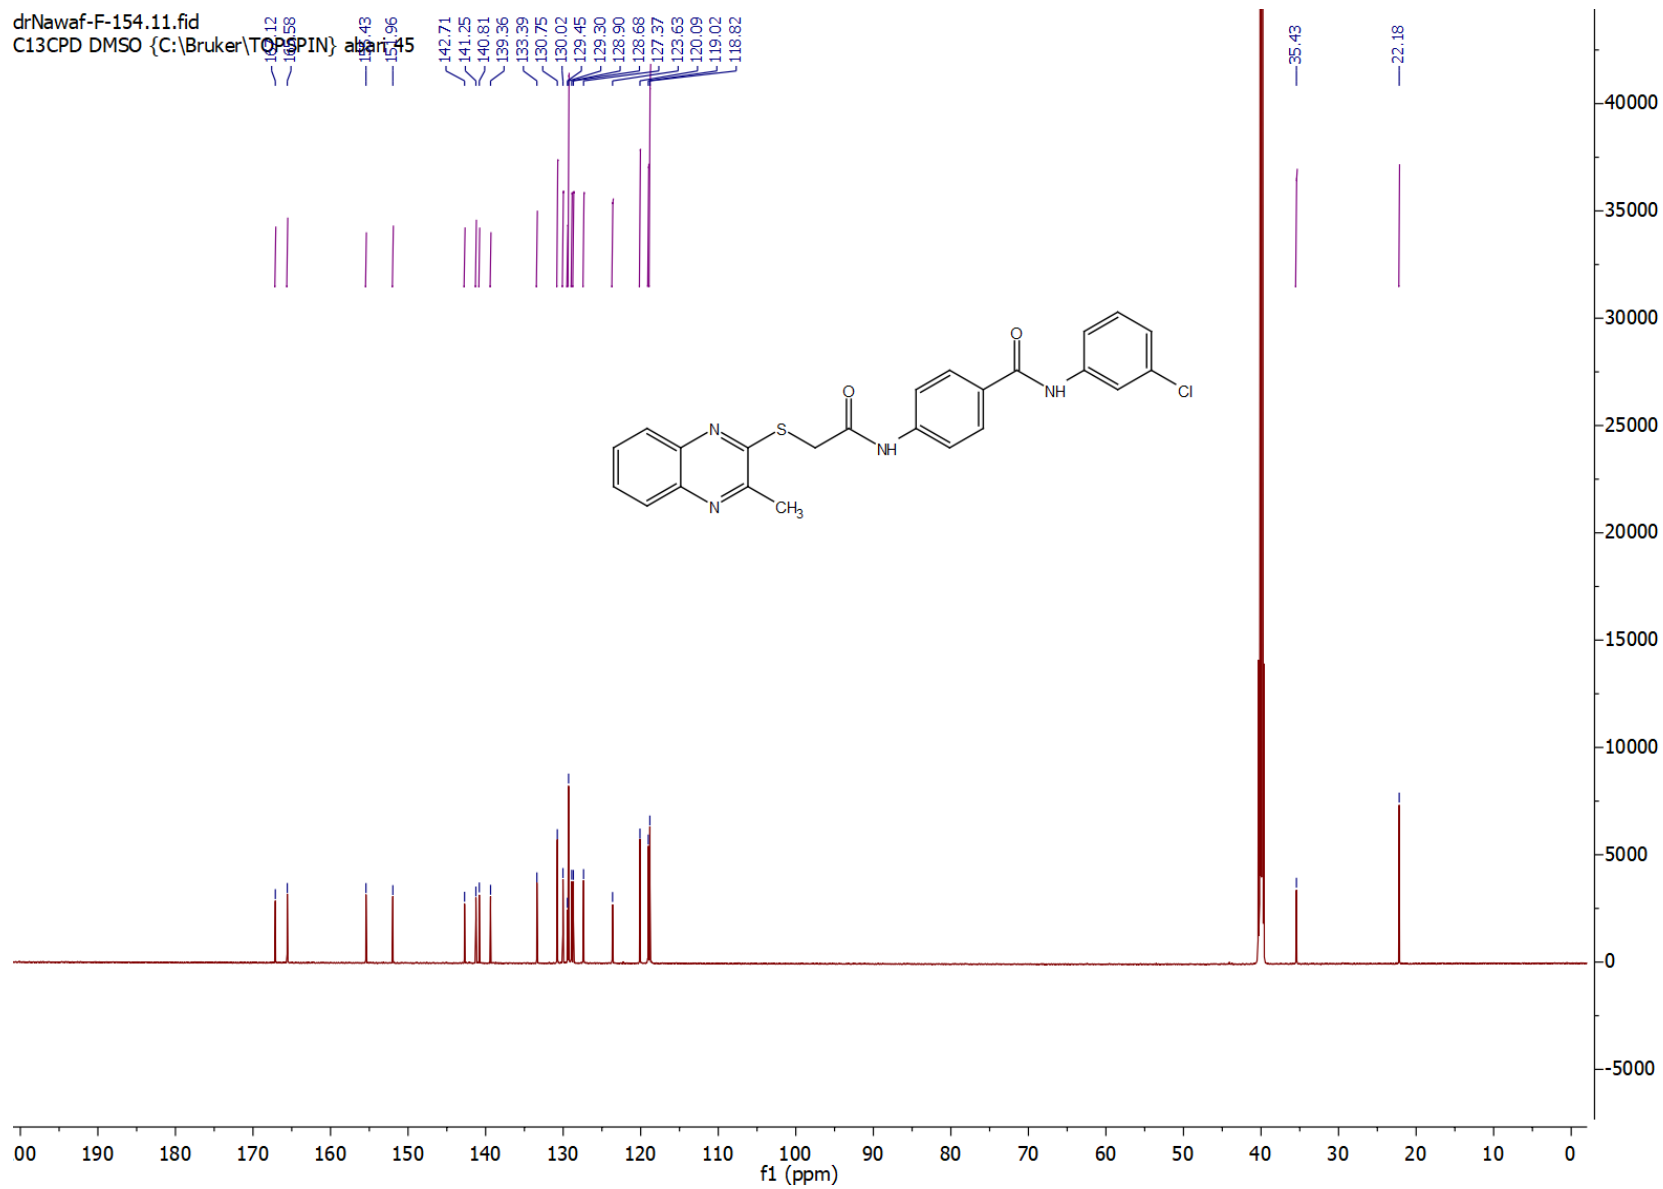

15b

### Peak Find - Memory-147

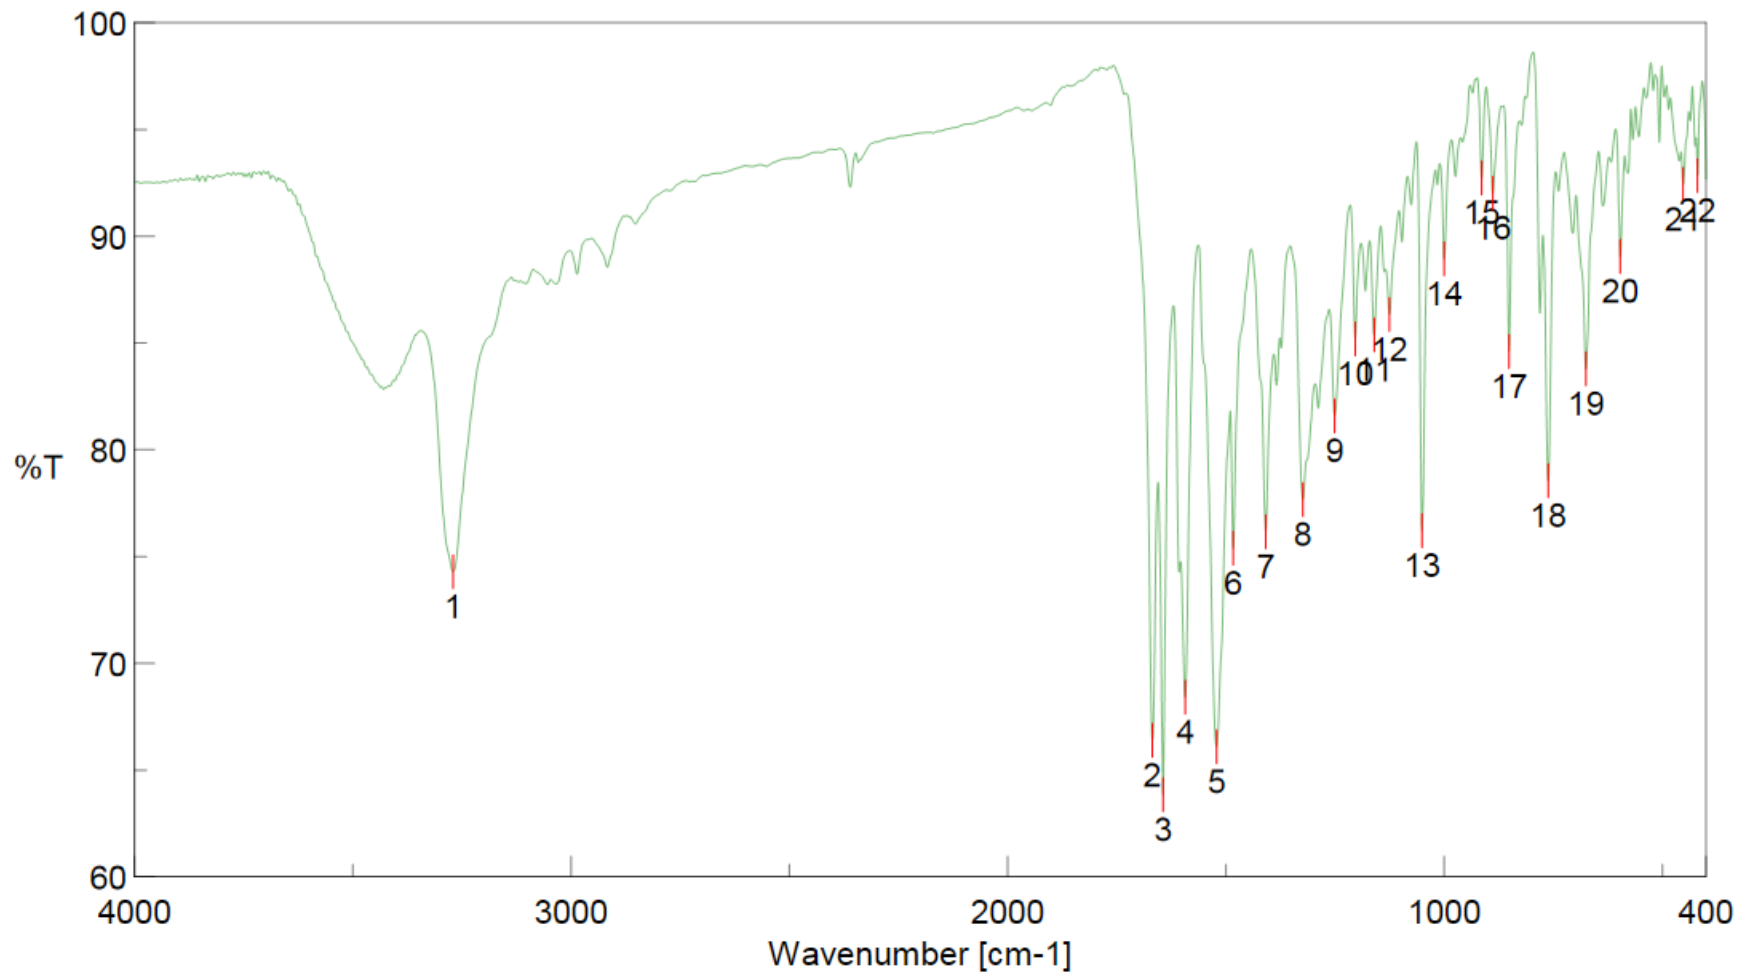

15b

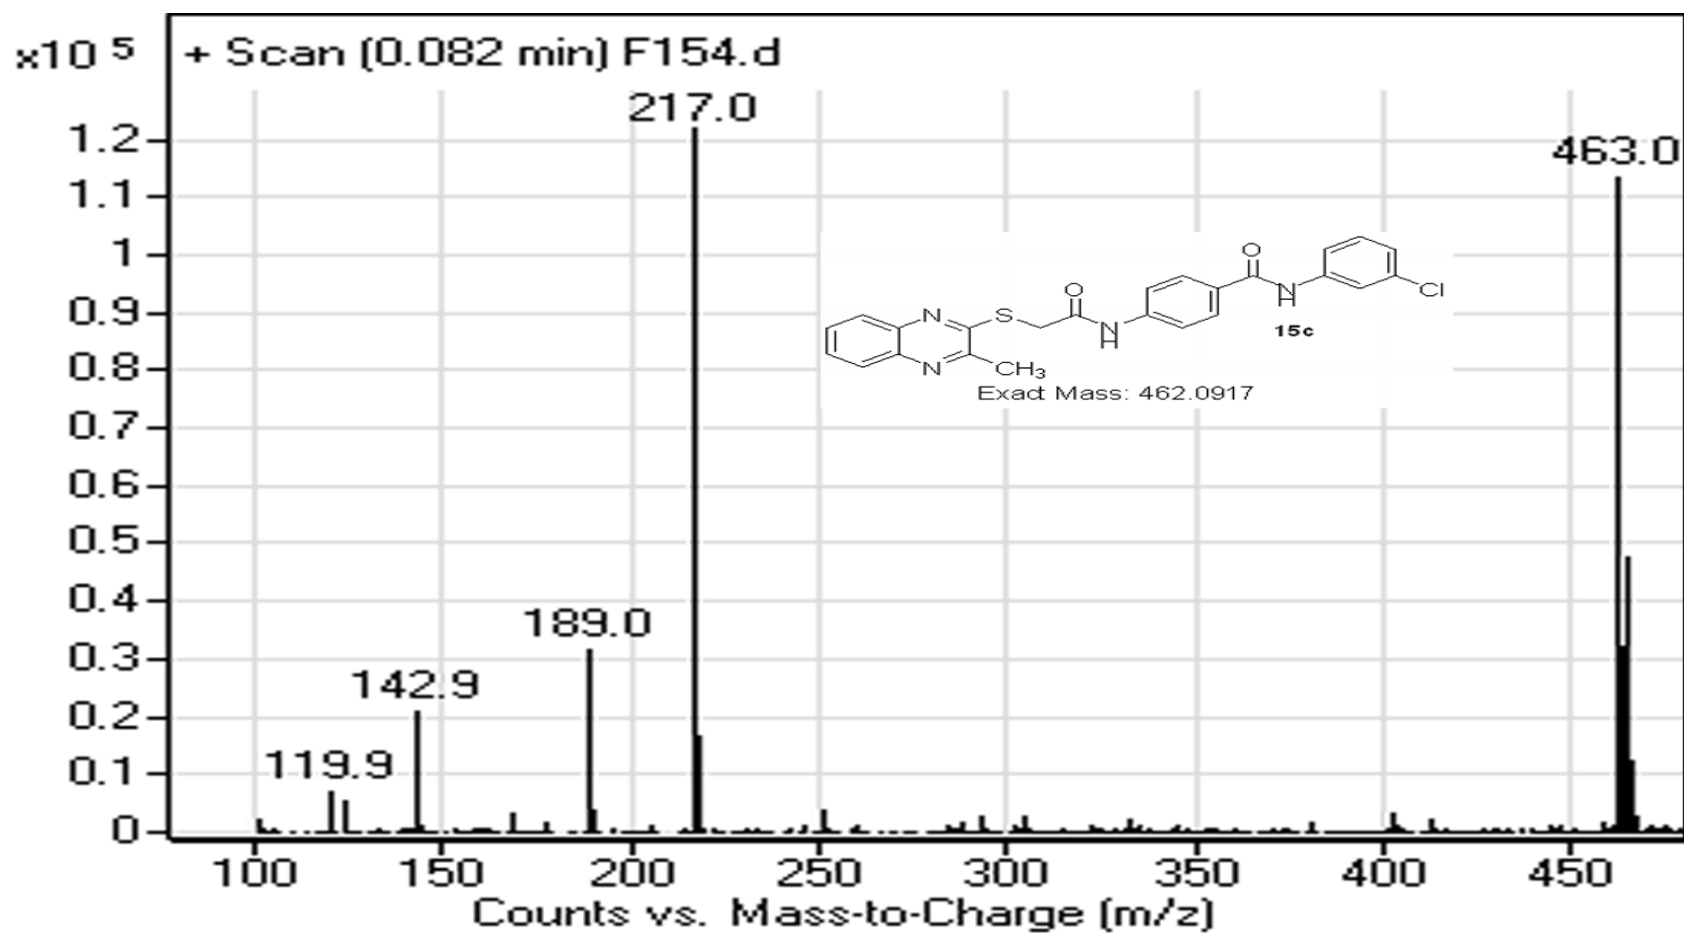

15c

drNawaf-F-179\_10.fid  
 PROTON DMSO-d6, Bruker TOPSPIN 4.1

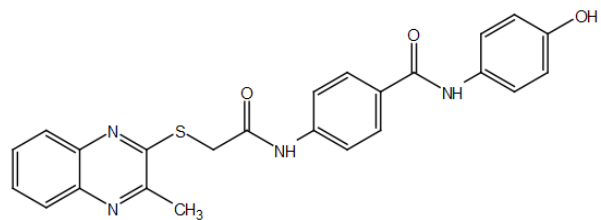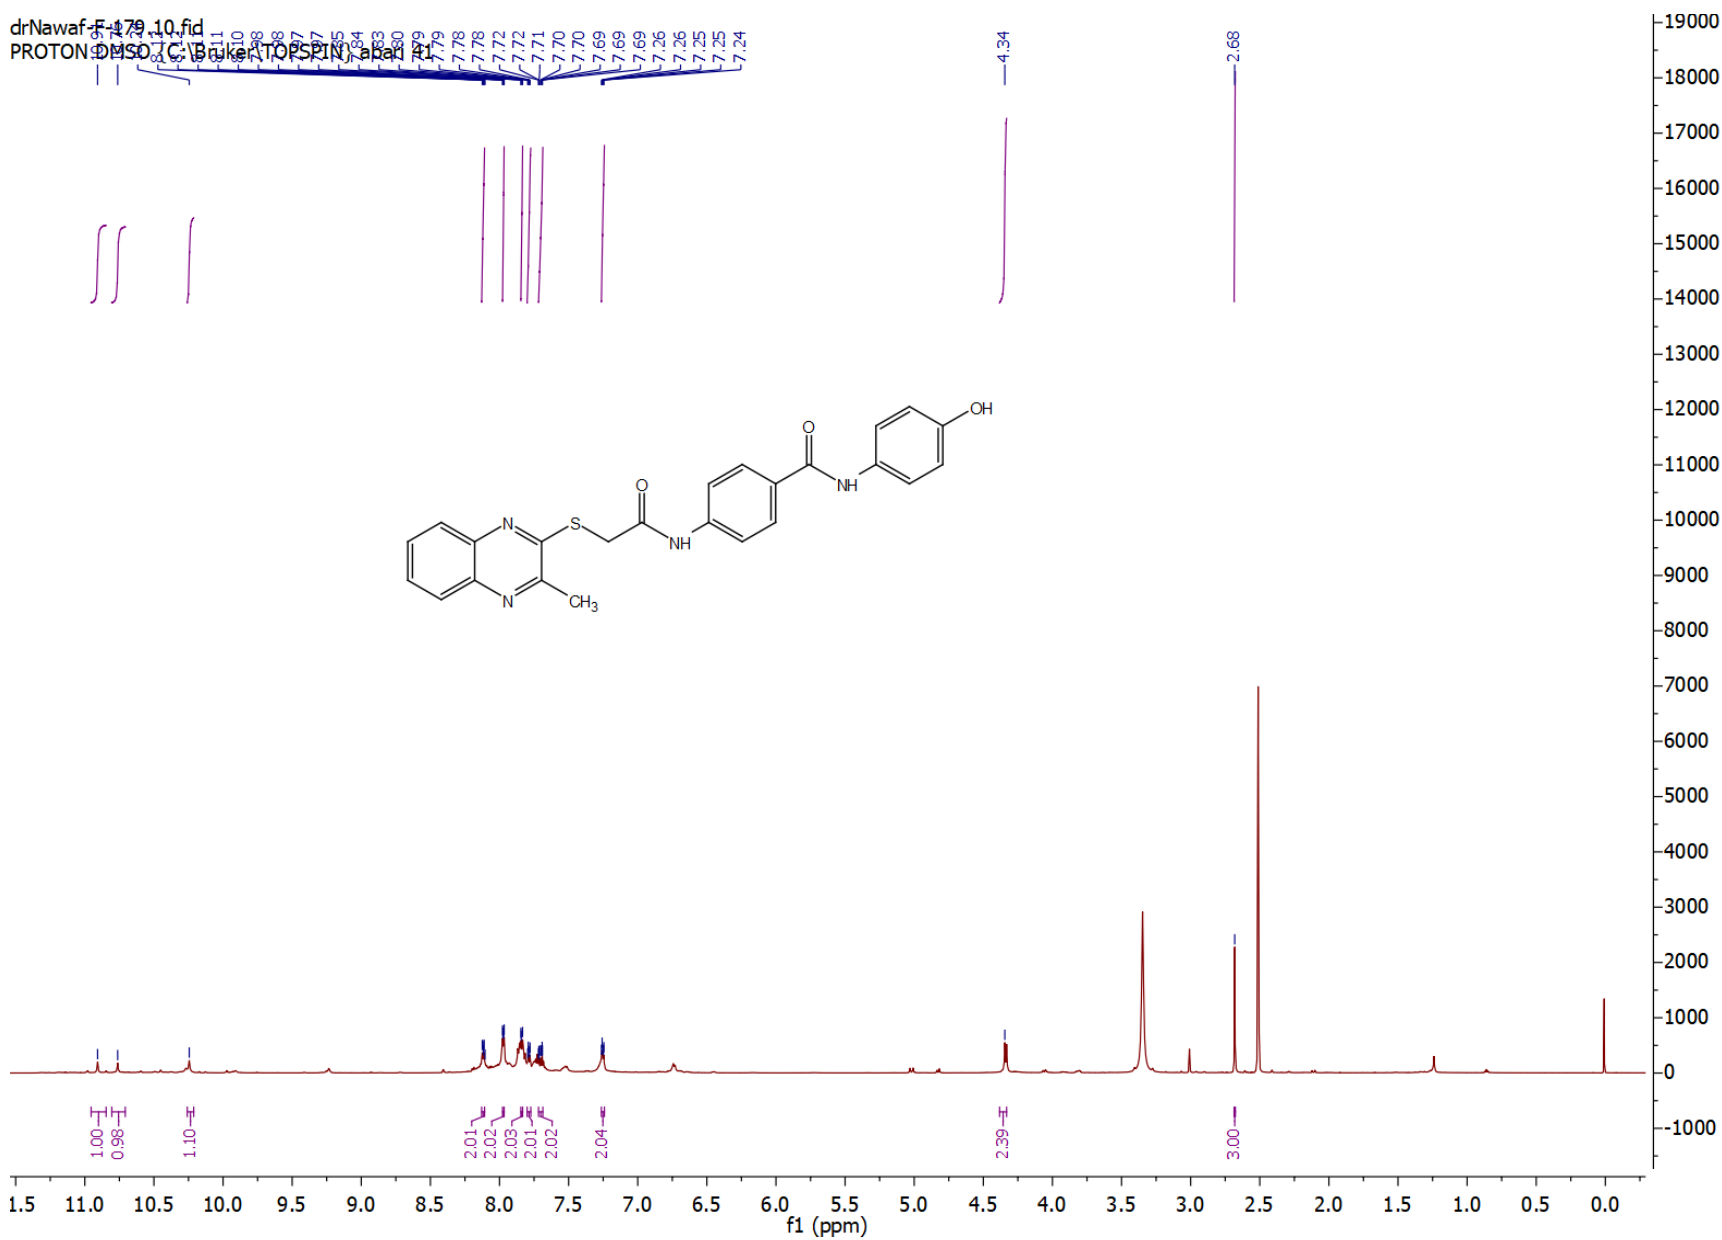

15c

drNawaf-F-179.11.fid  
C13CPD DMSO {C:\Bruker\TOPSPIN} abar 41.5

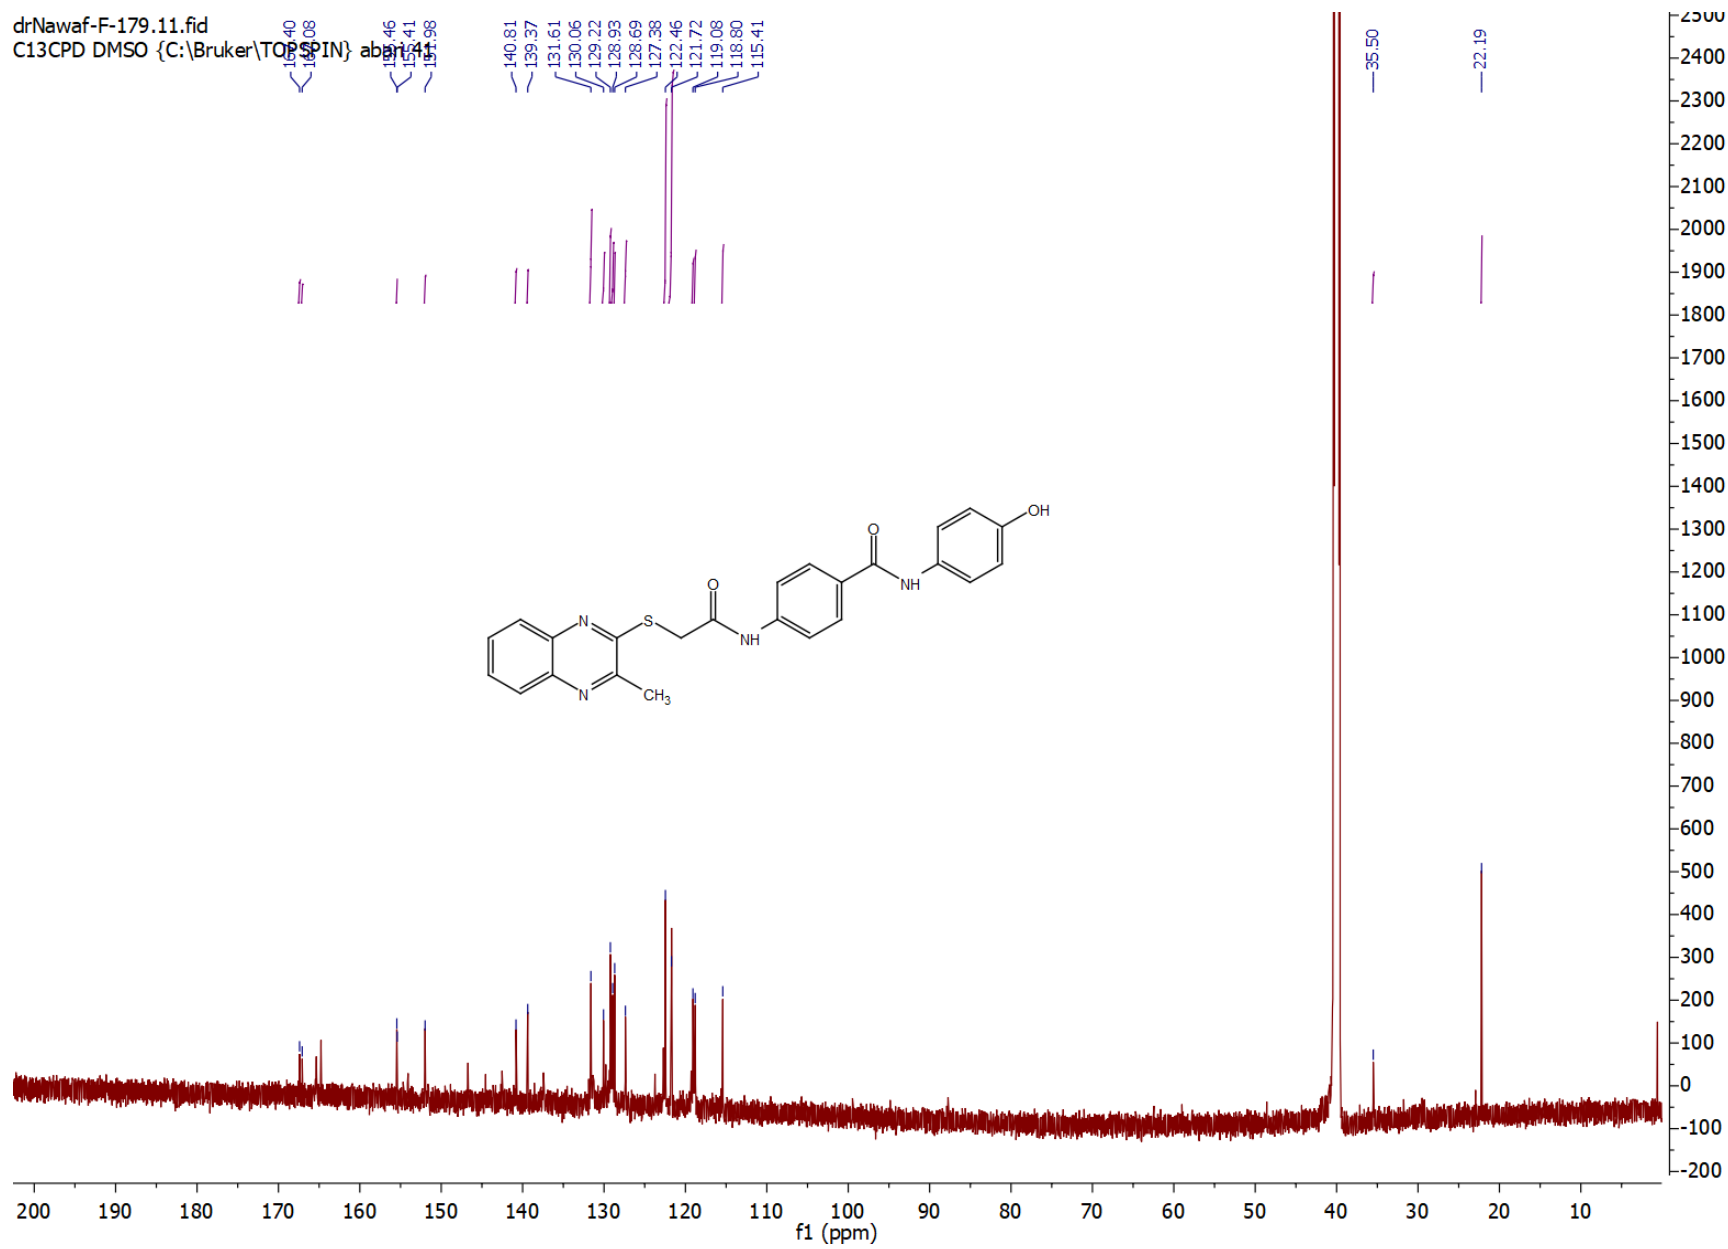

15c

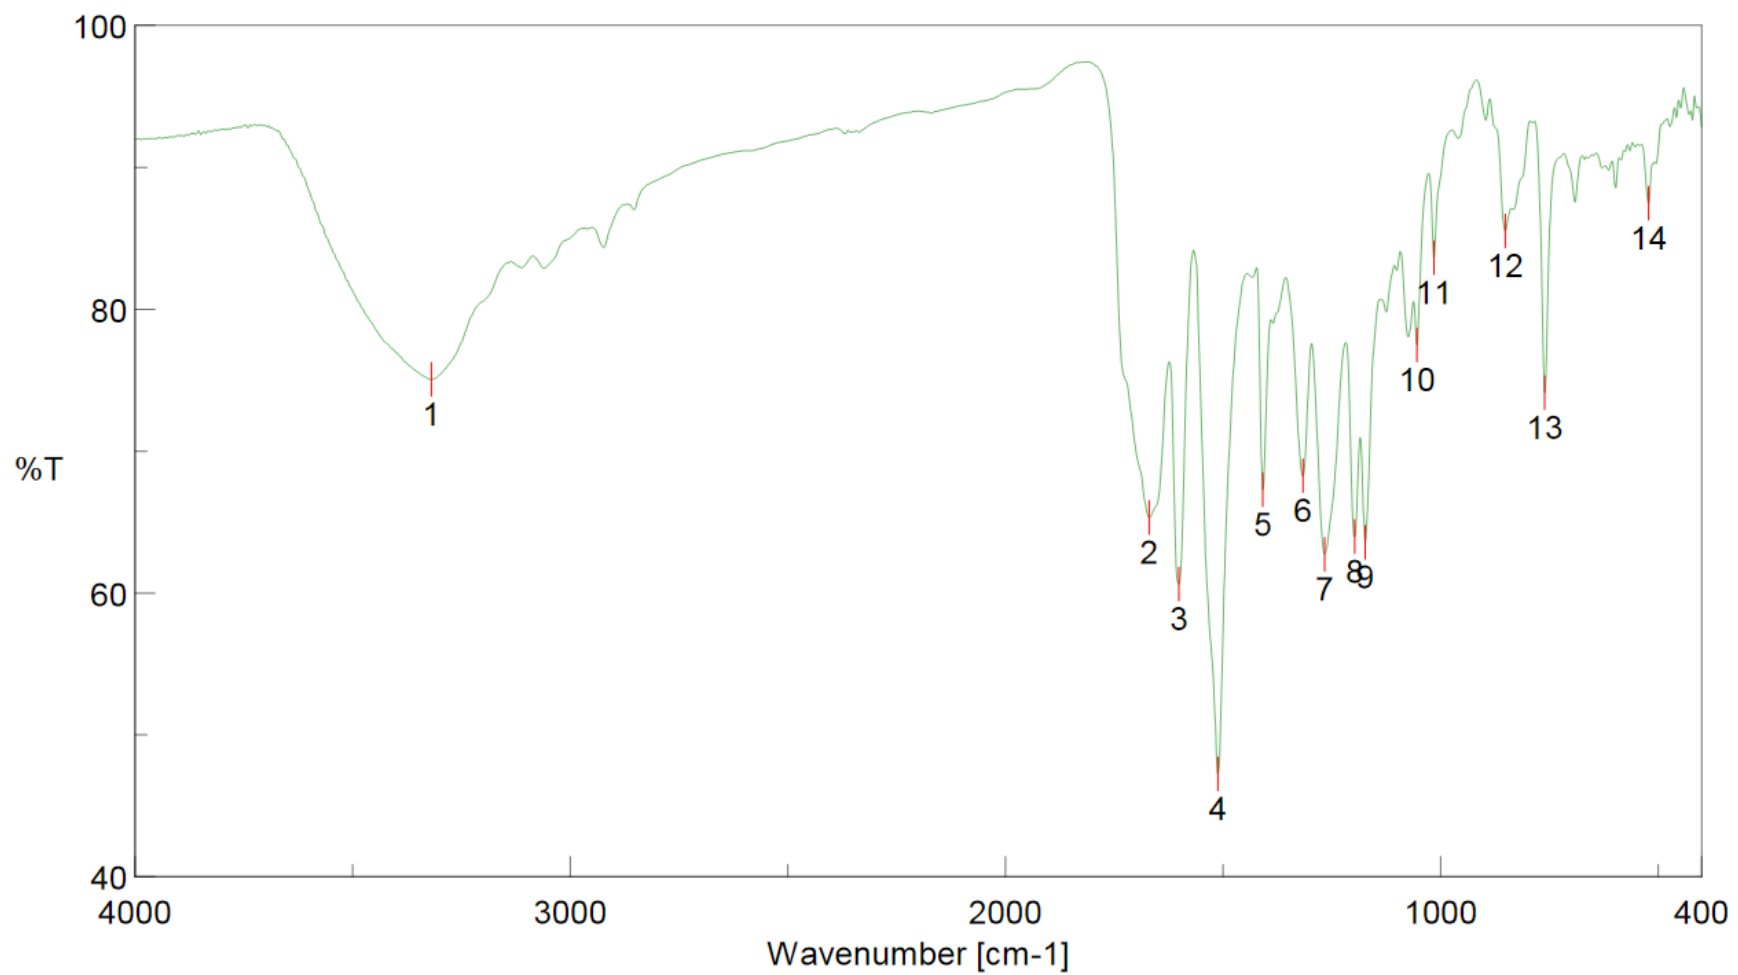



15c

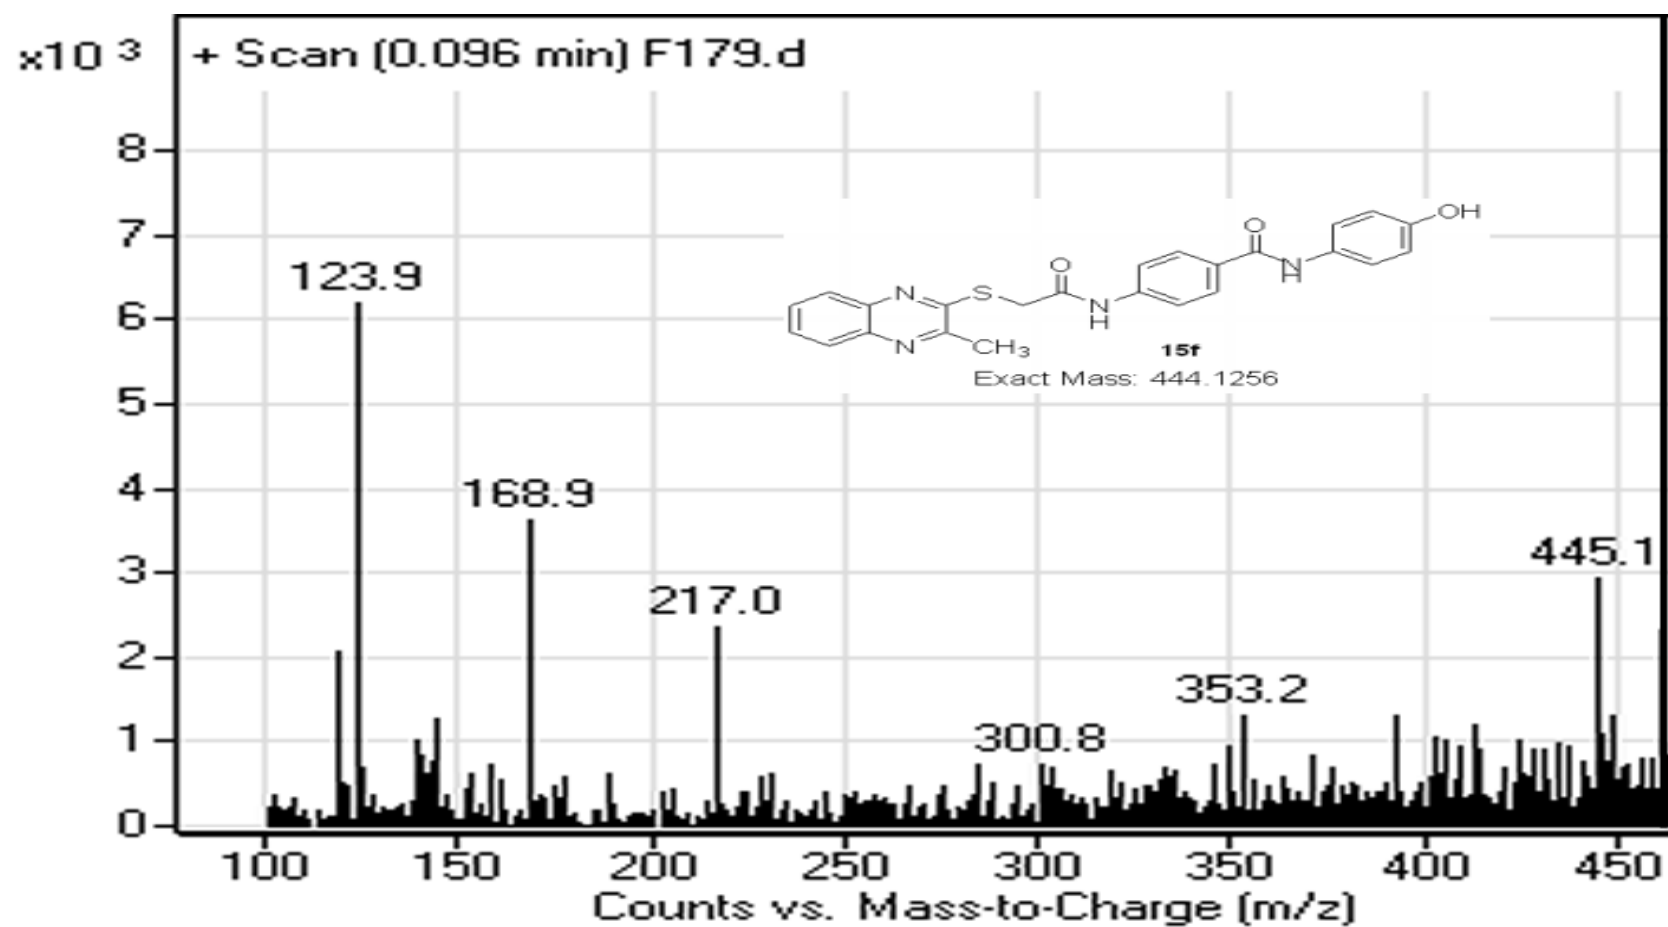

15d

drNavaf-F-171.10.fid  
PROTON DMSO (C:\Bruker\TOPSPIN) aban 26

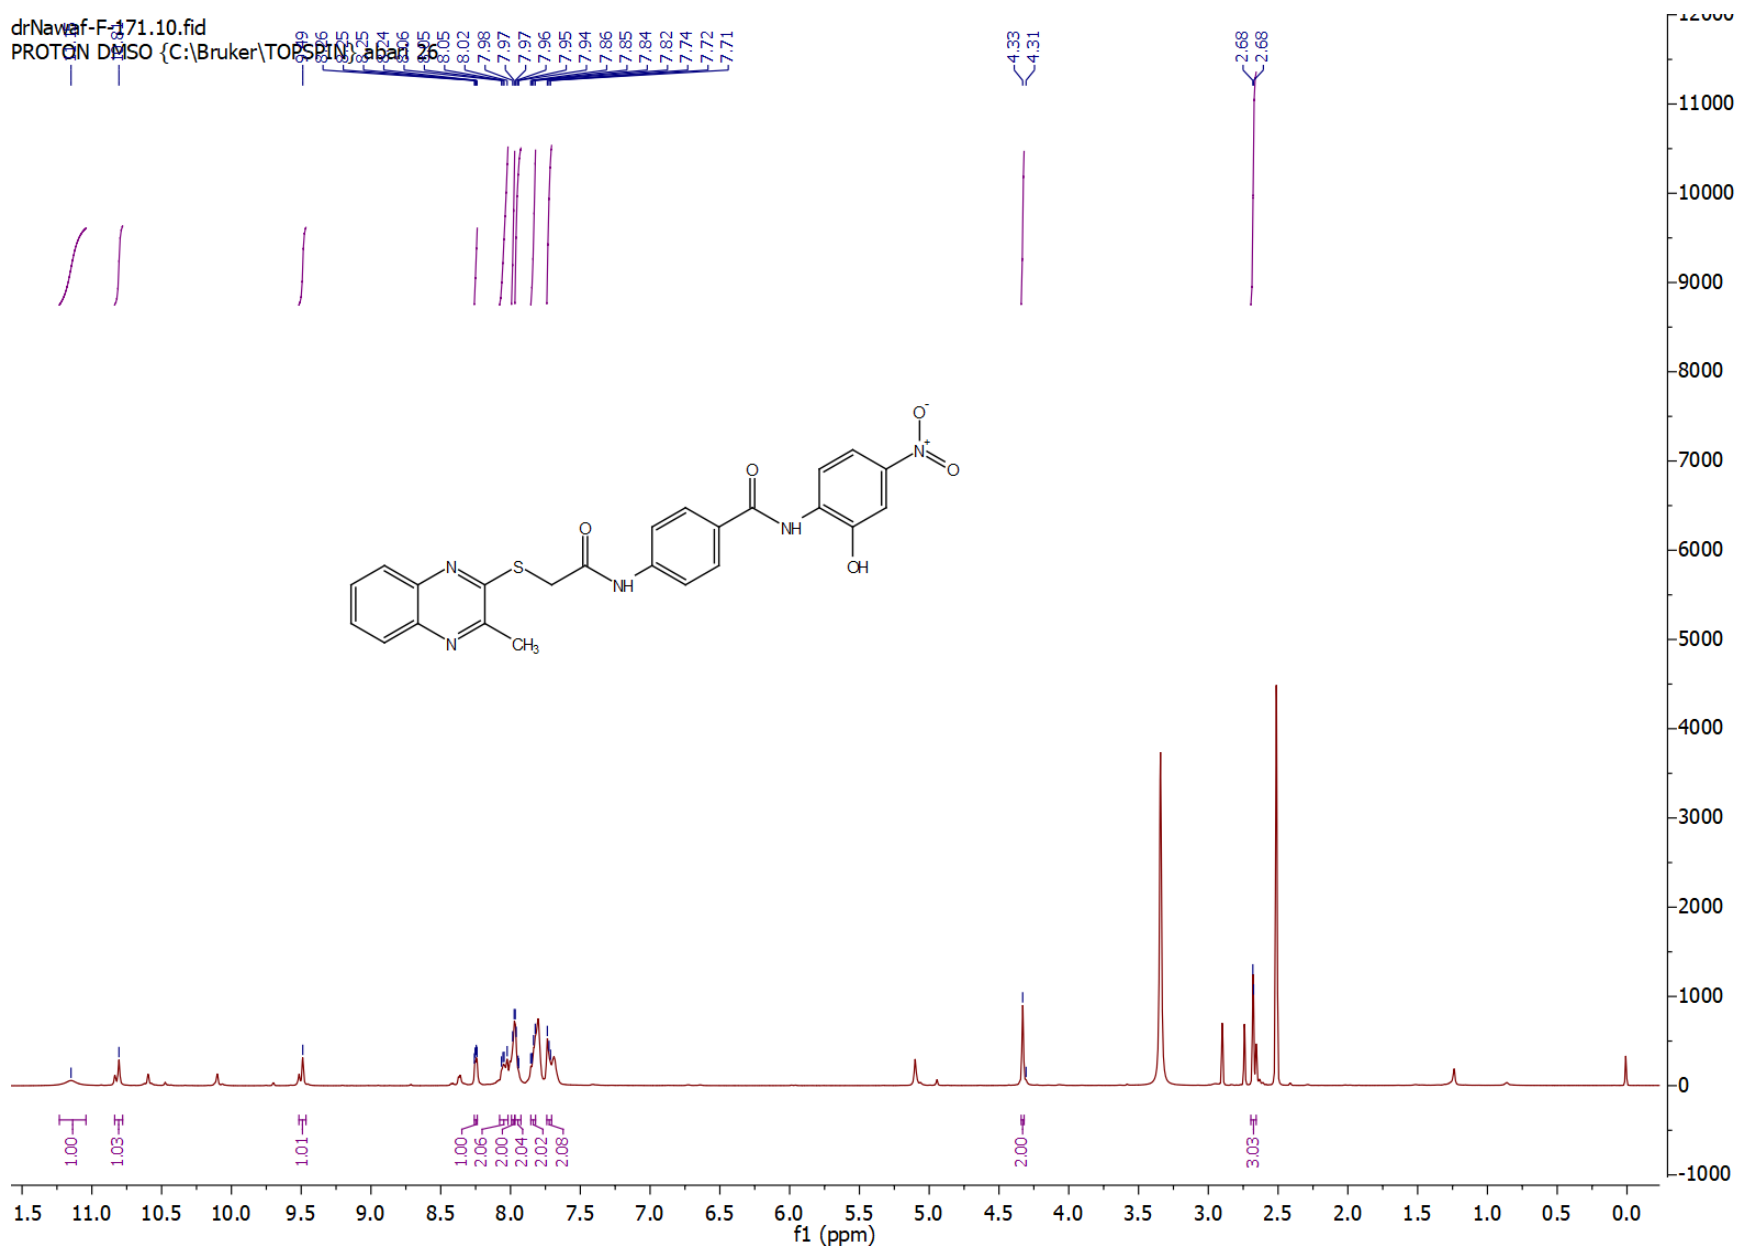

15d

drNawaf-F-171.11.fid  
C13CPD DMSO {C:\Bruker\TOPSPIN}

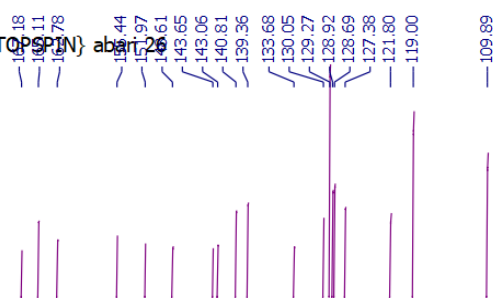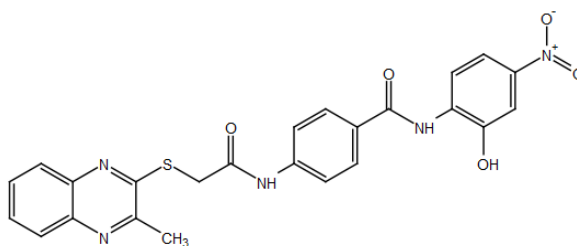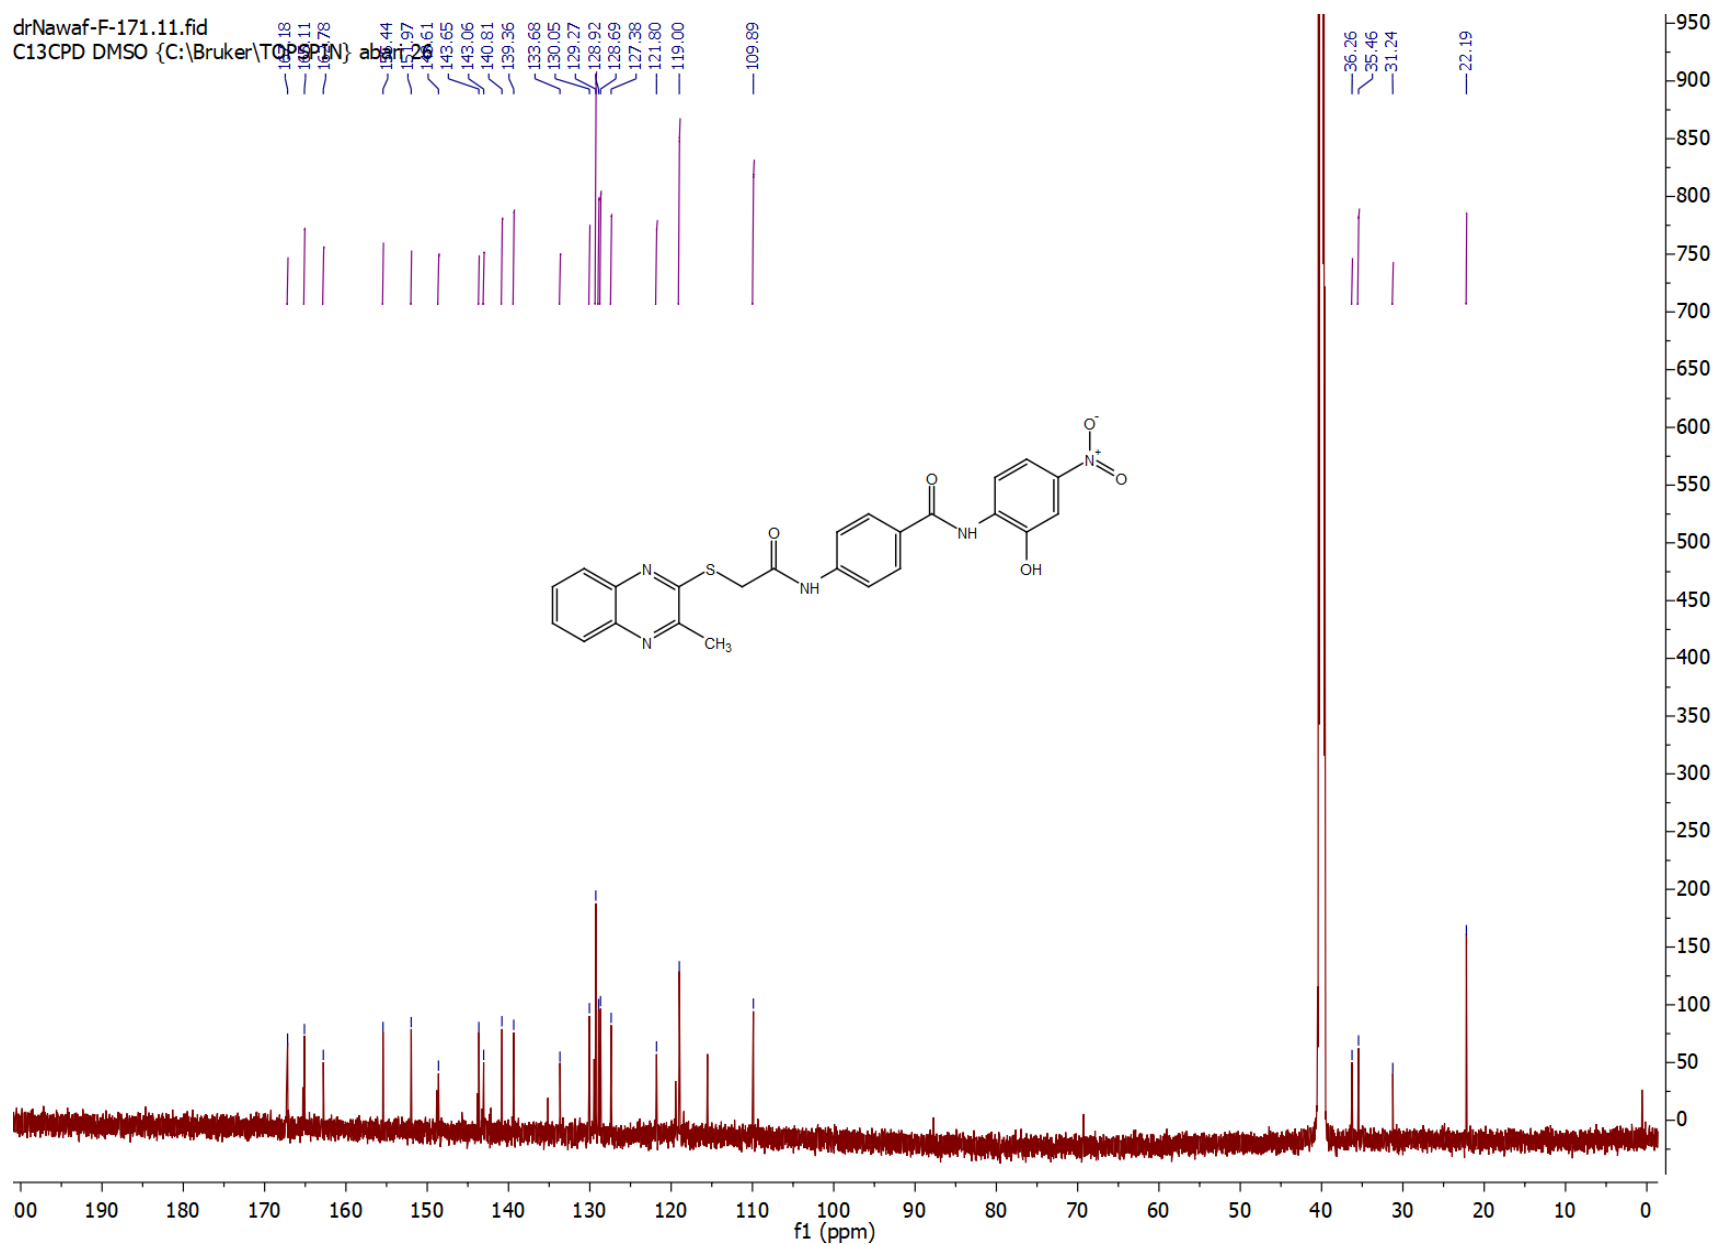

15d

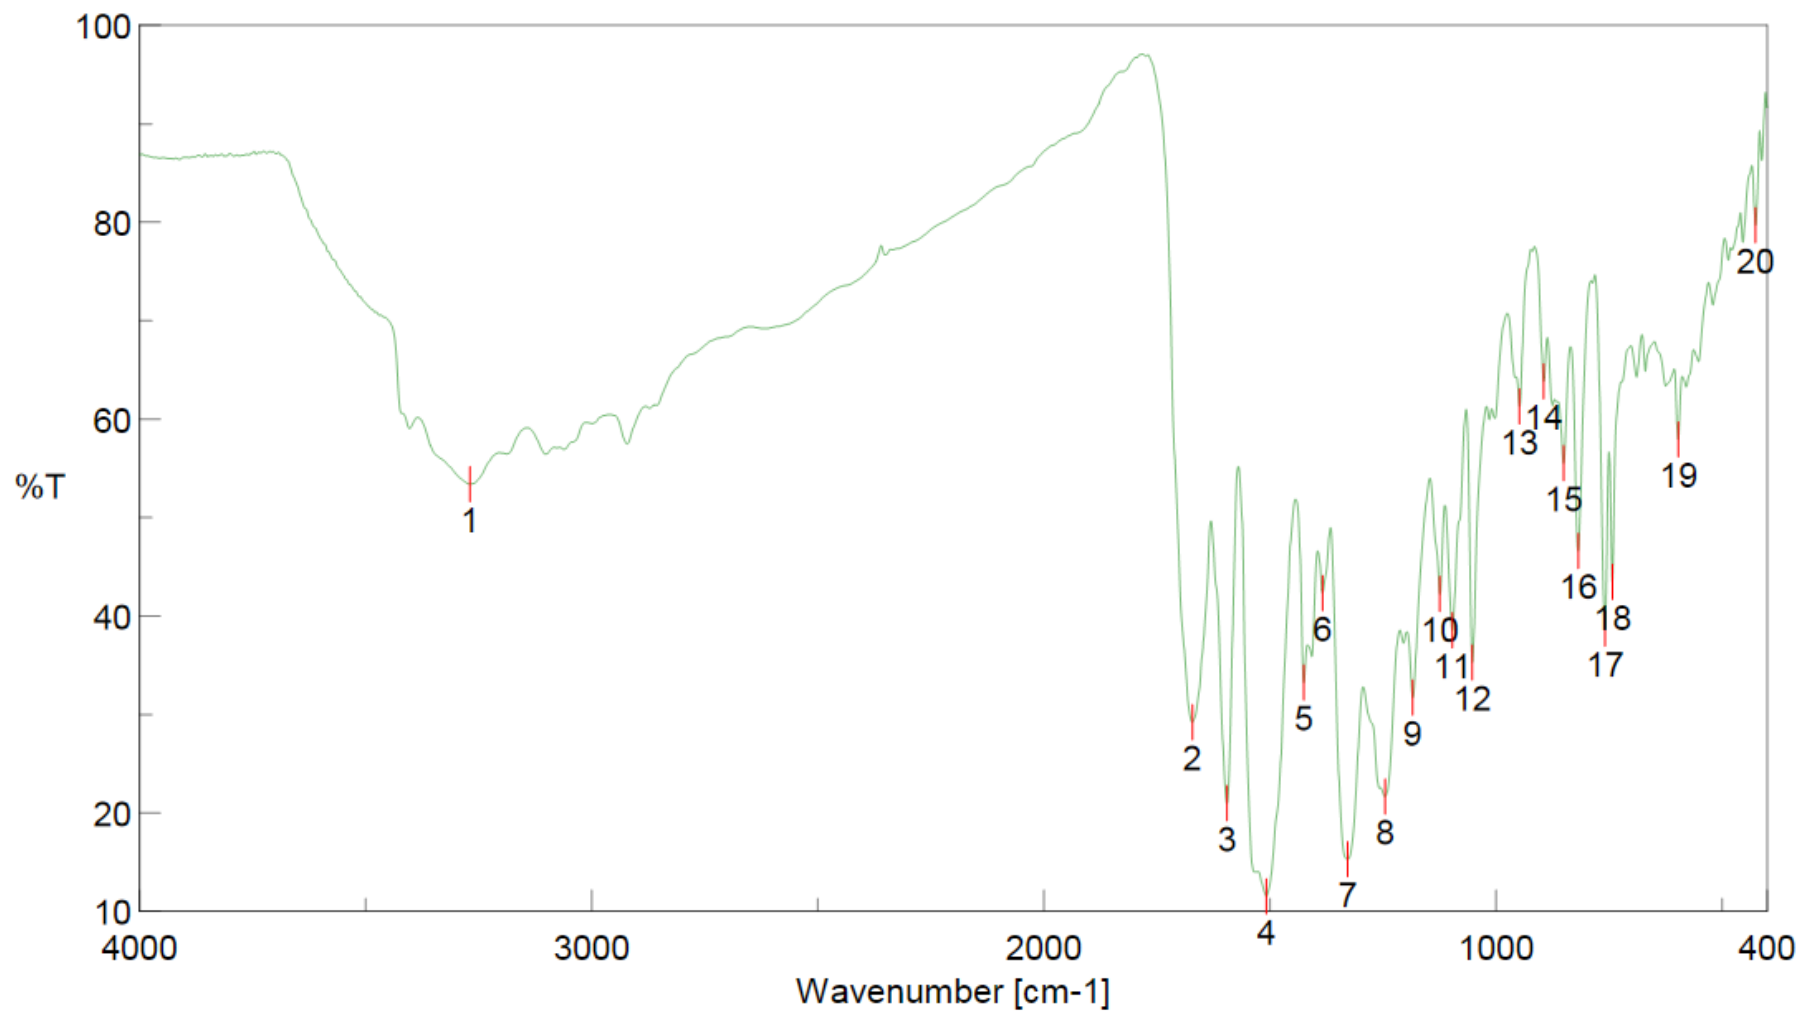

15d

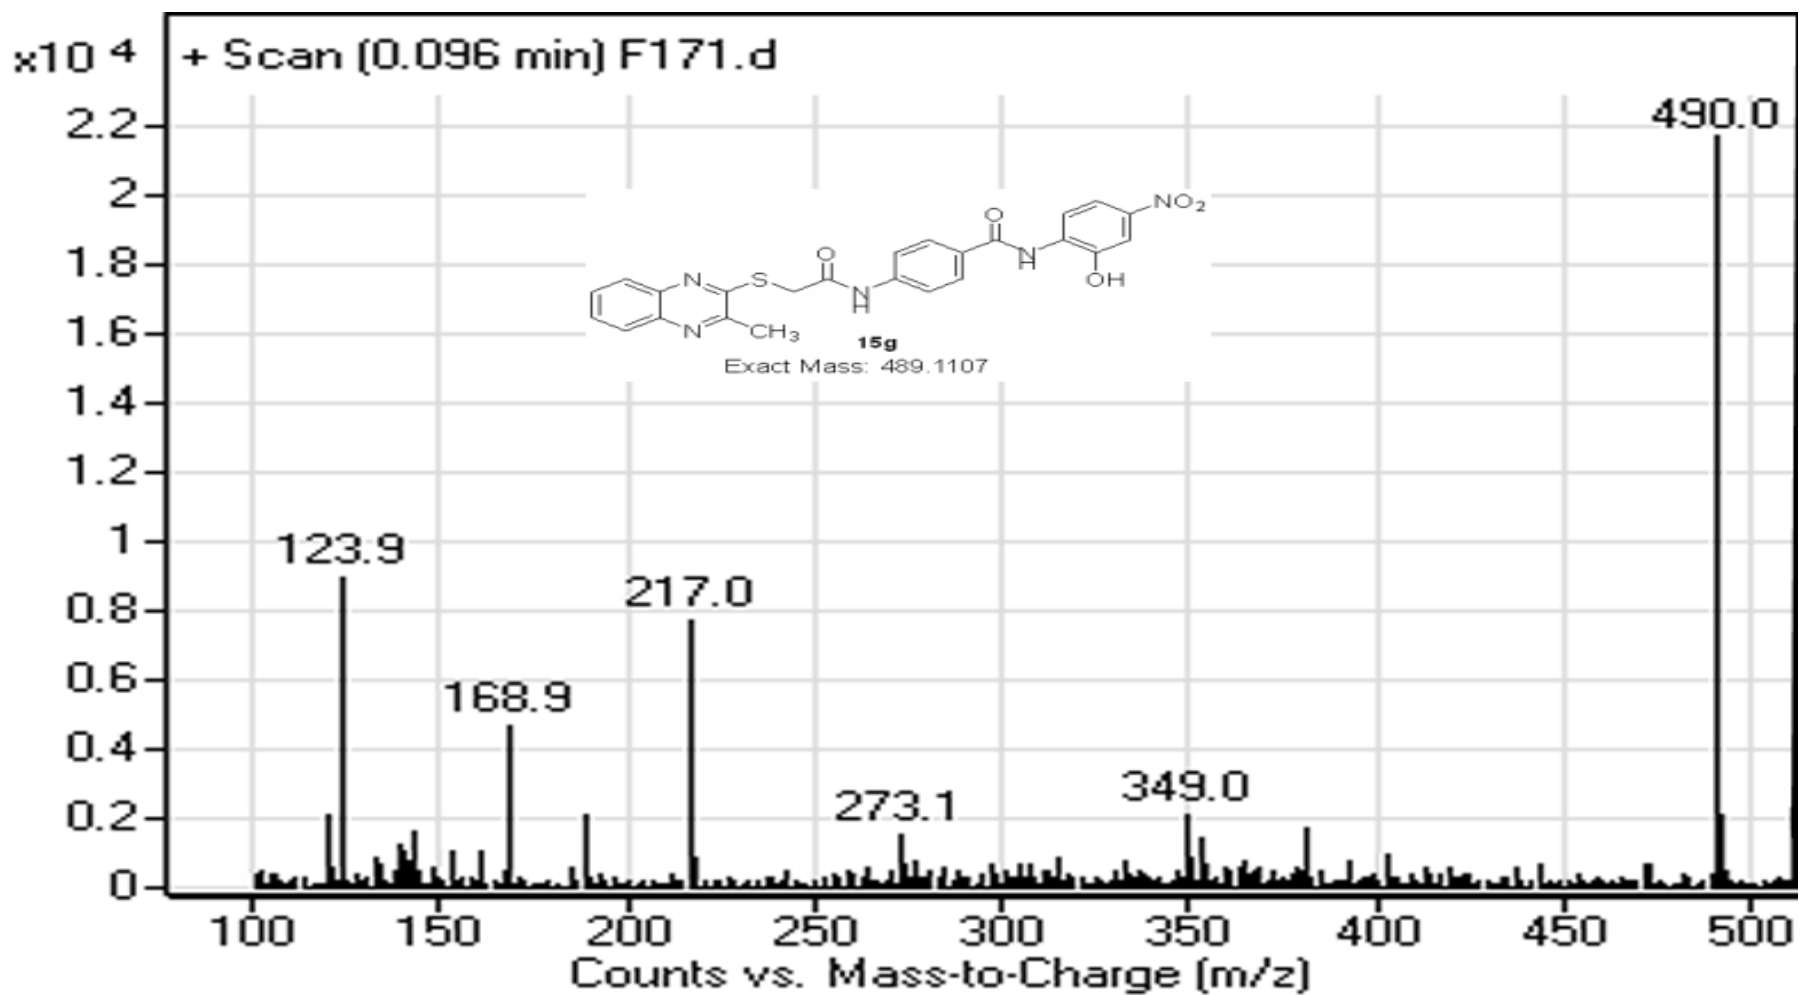

16

drNawaf-F-185.10.fid  
PROTON DMSO (C:\Baker\TOPSPIN) abari 15

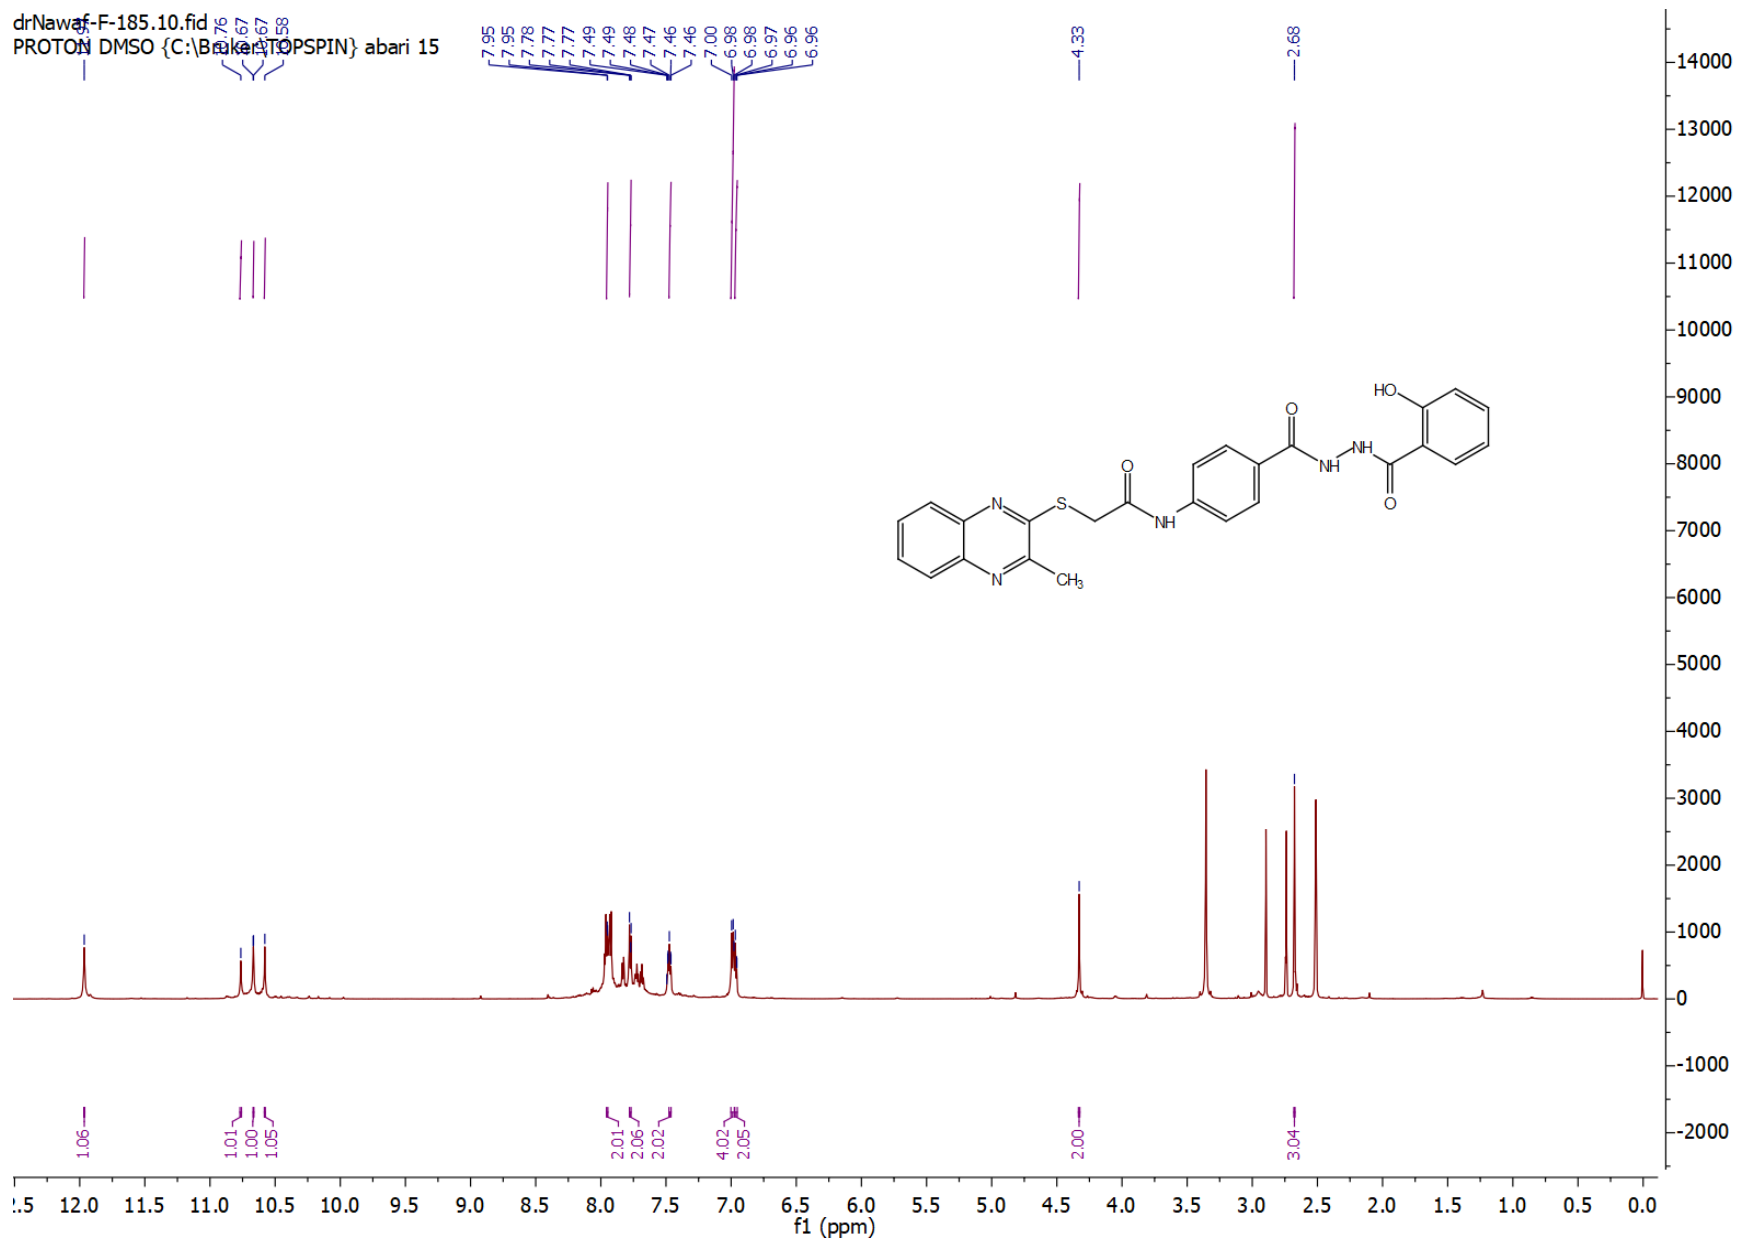

16

drNawaf-F-185.11.fid  
C13CPD DMSO {C:\Bruker\TOPSPIN\data\15

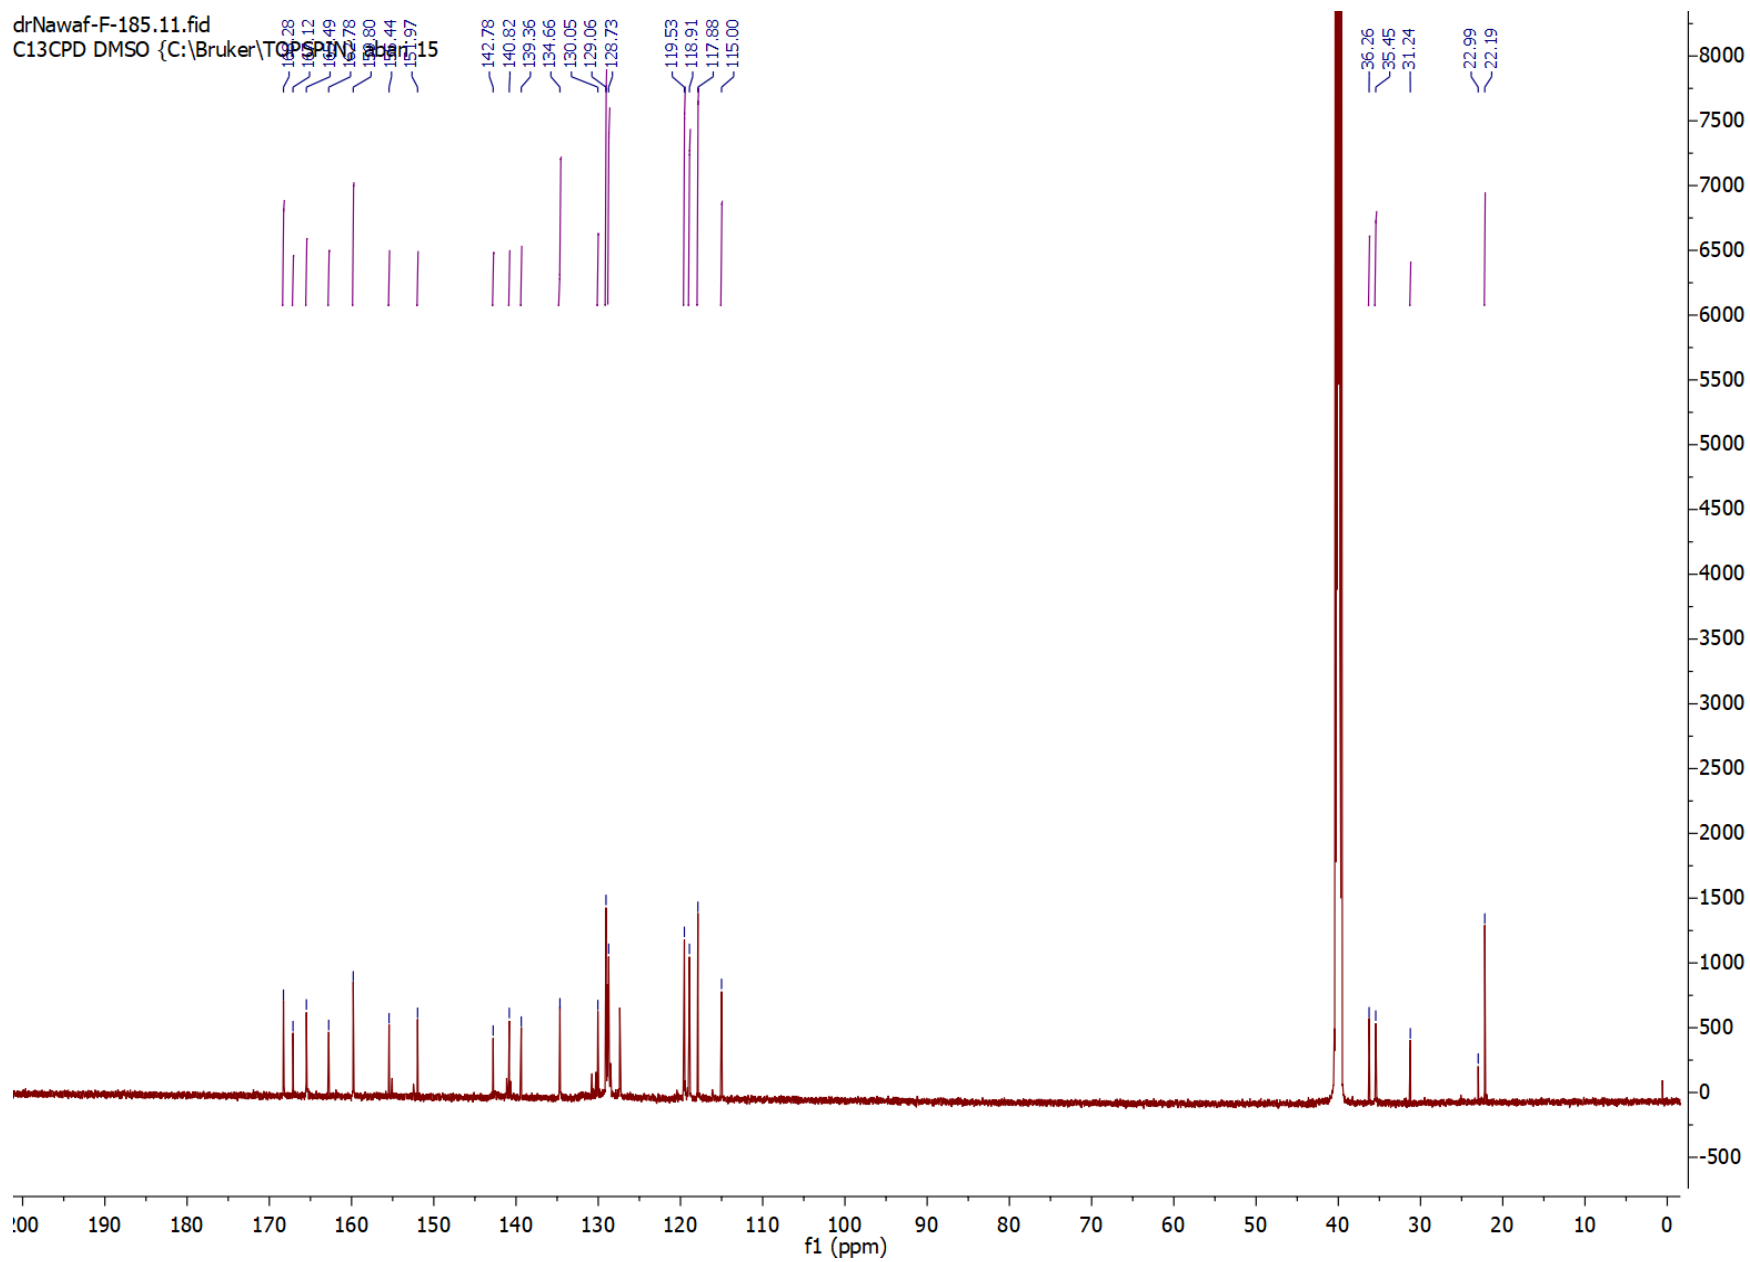

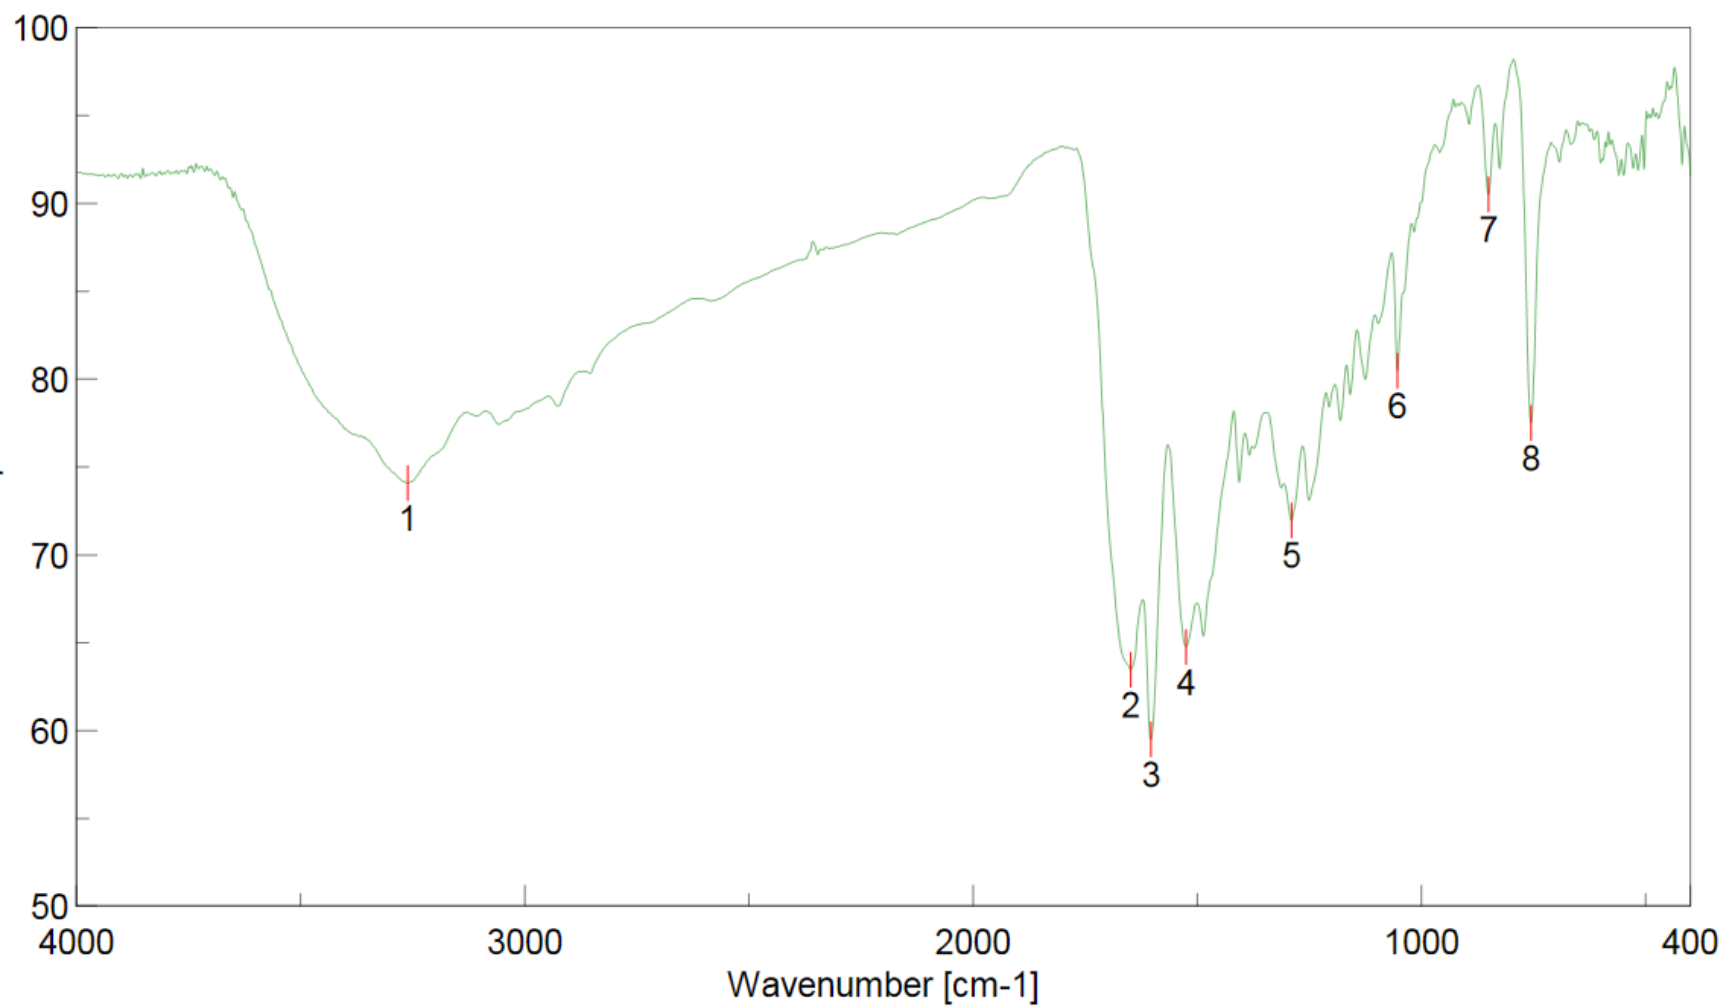



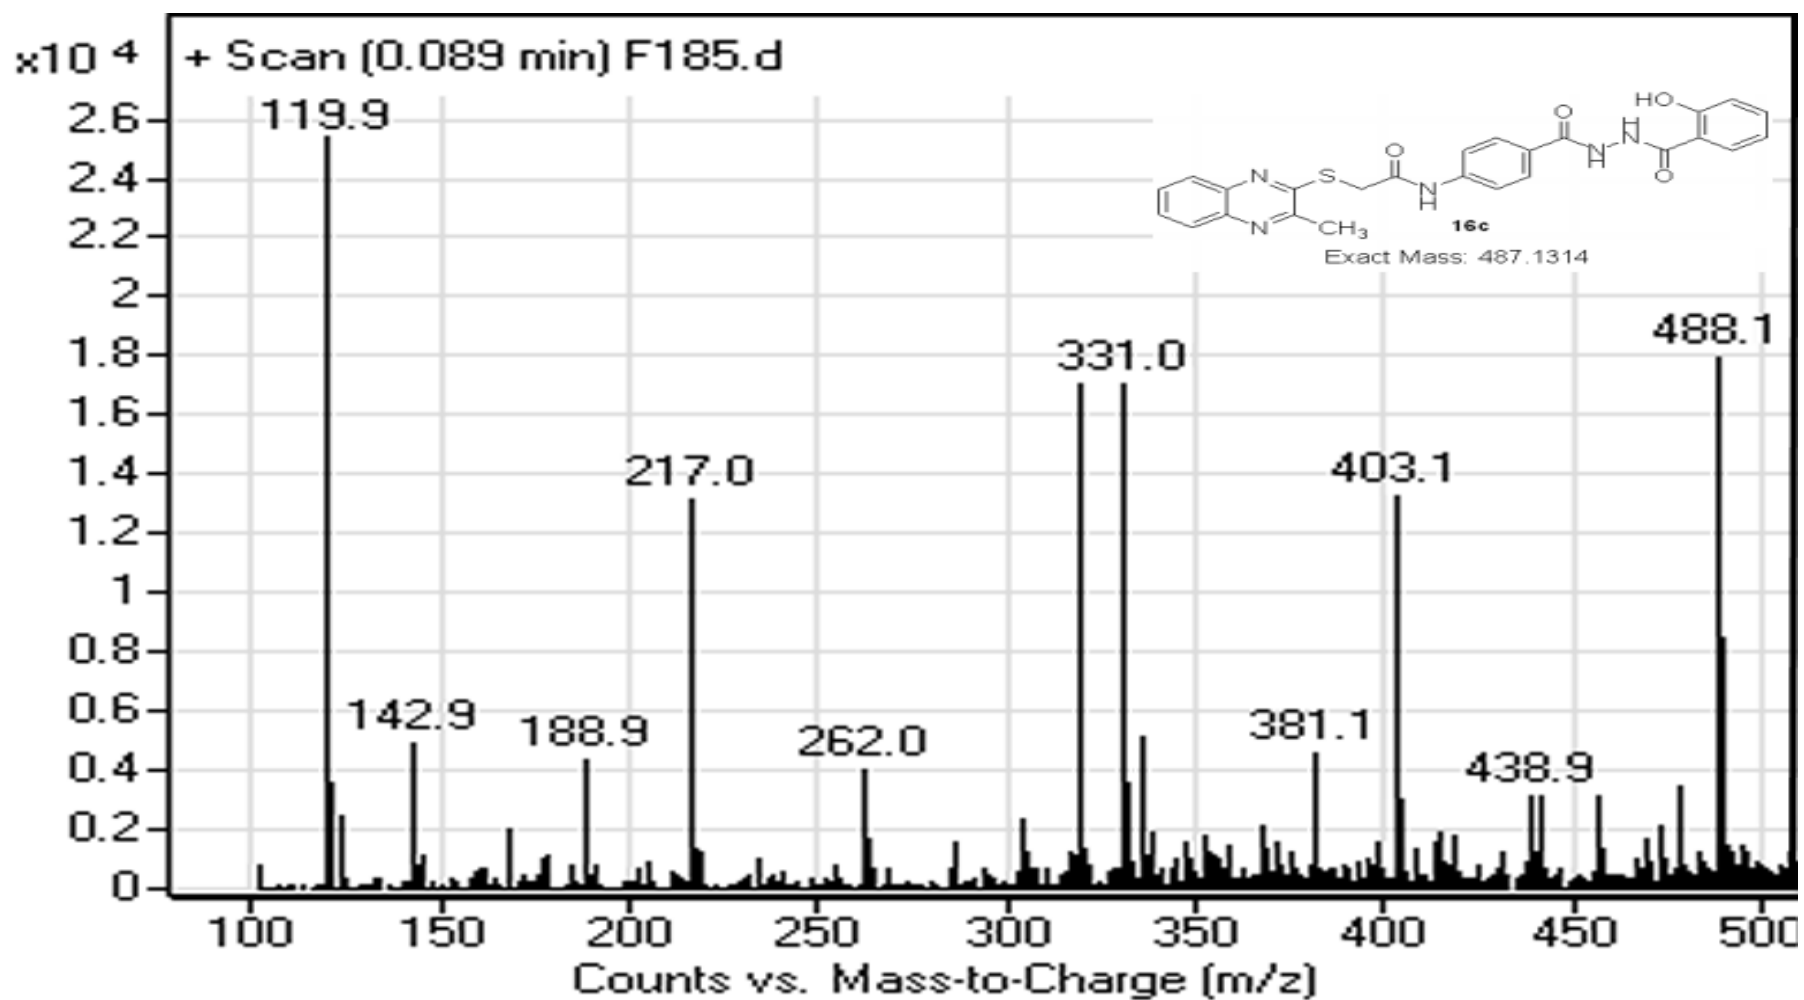

17a

drNawaf-F121.10.fid  
PROTON DIMSO (C:\Bruker\TOPSPIN) abari 36

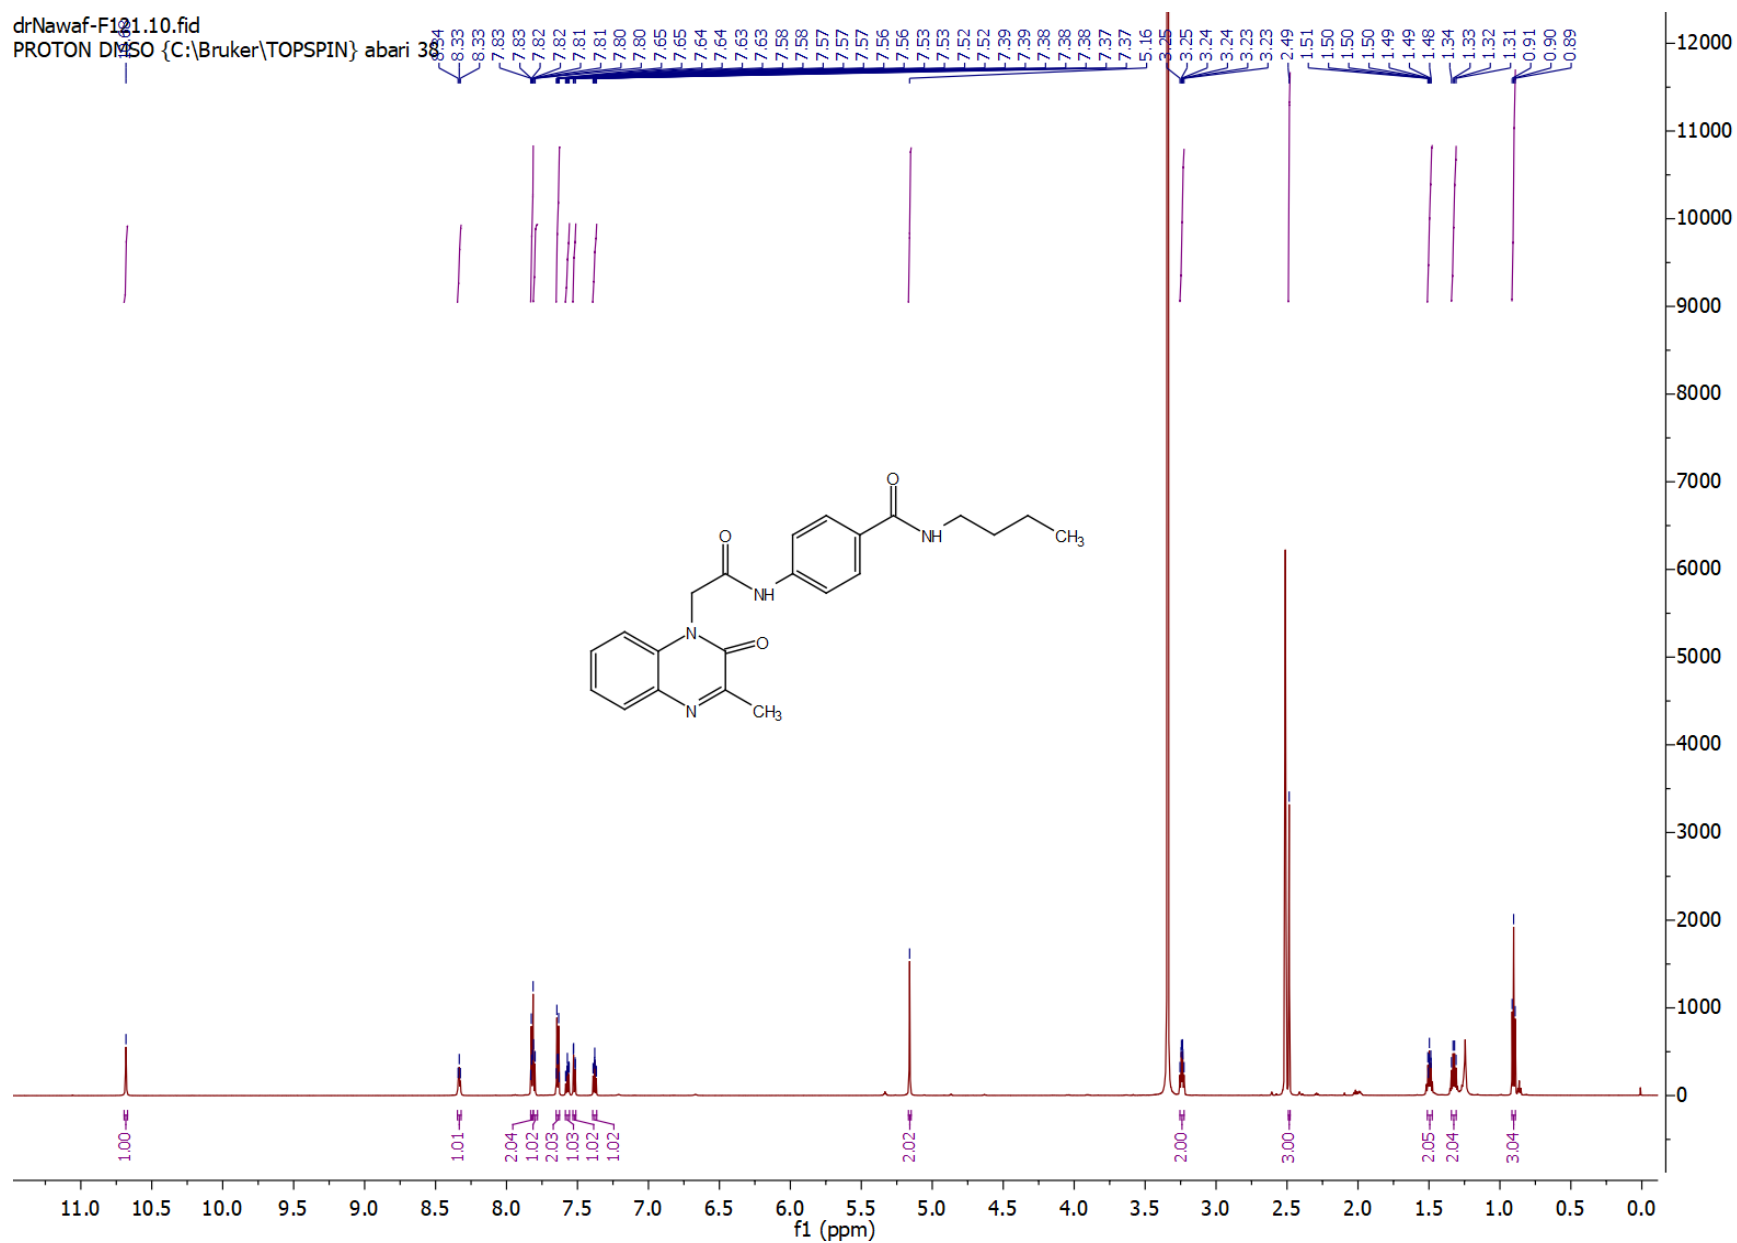

17a

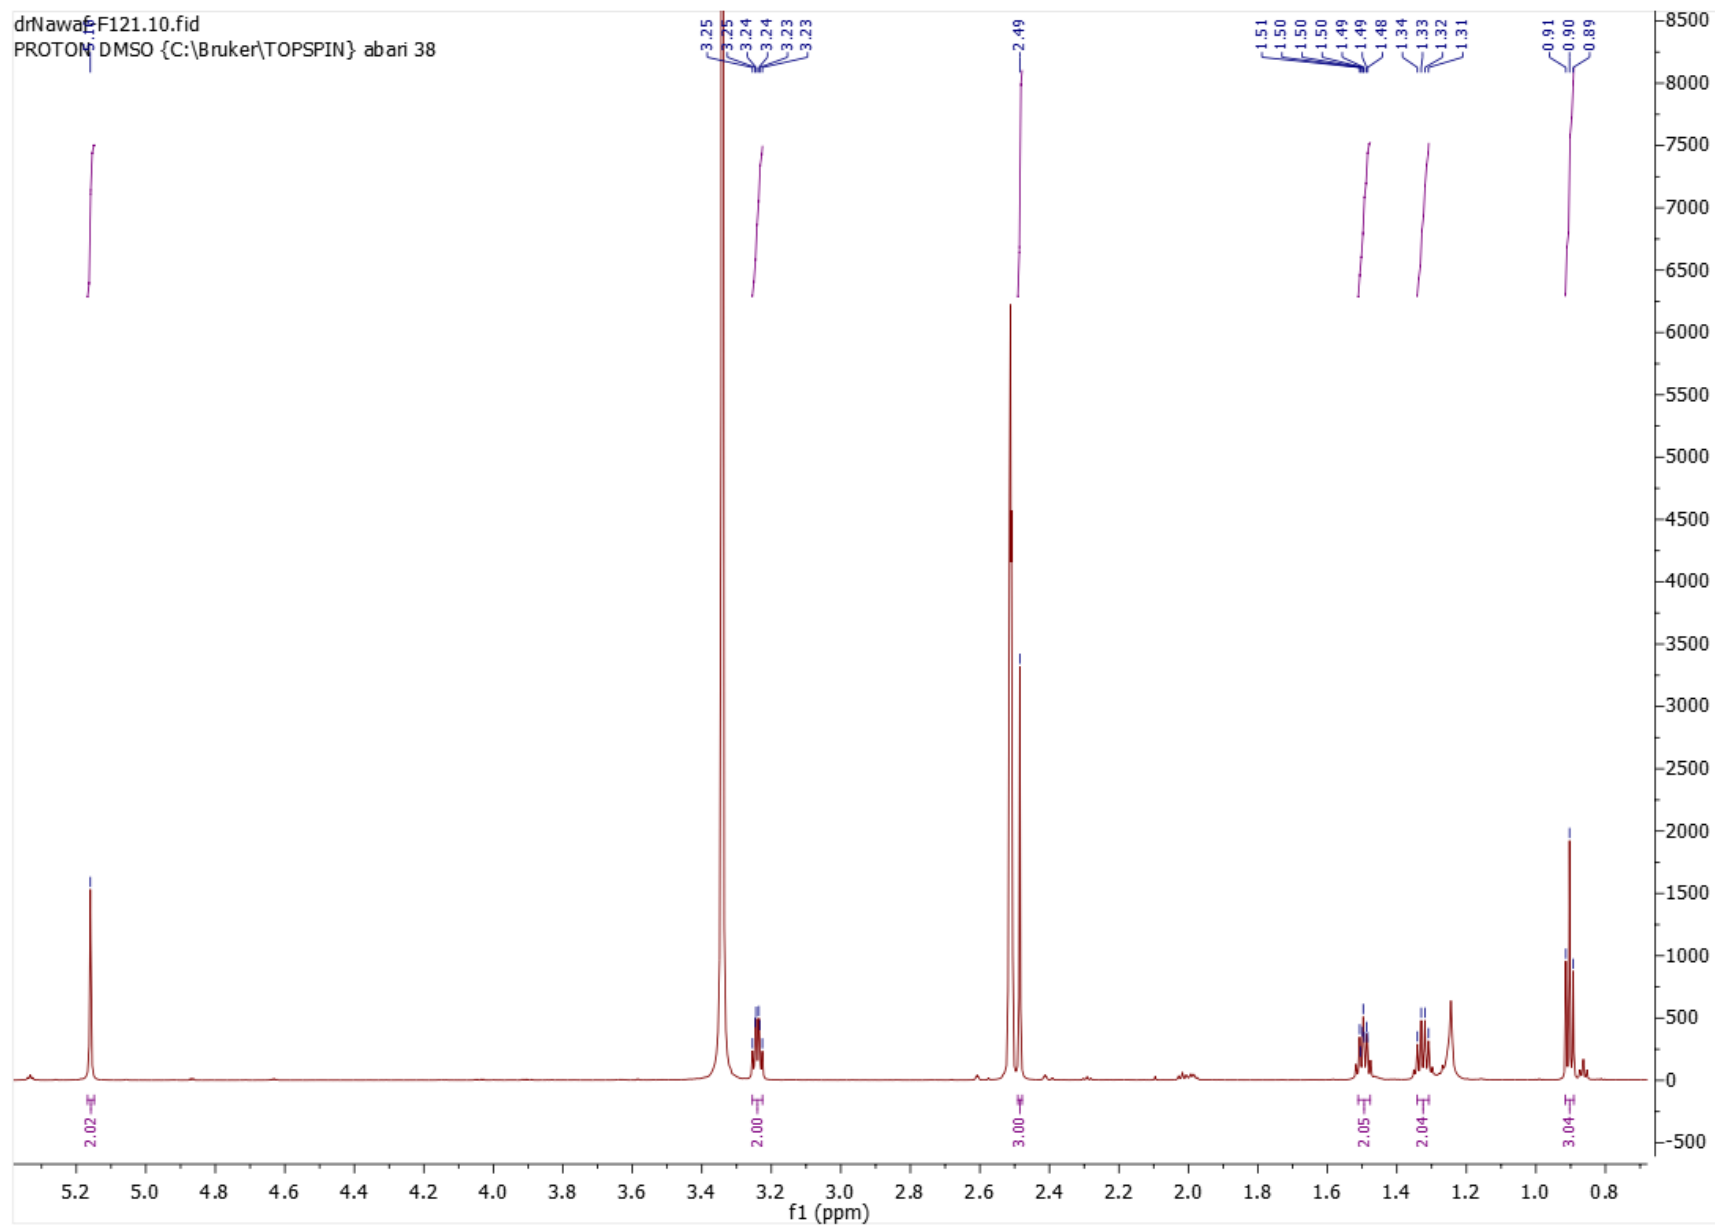

17a

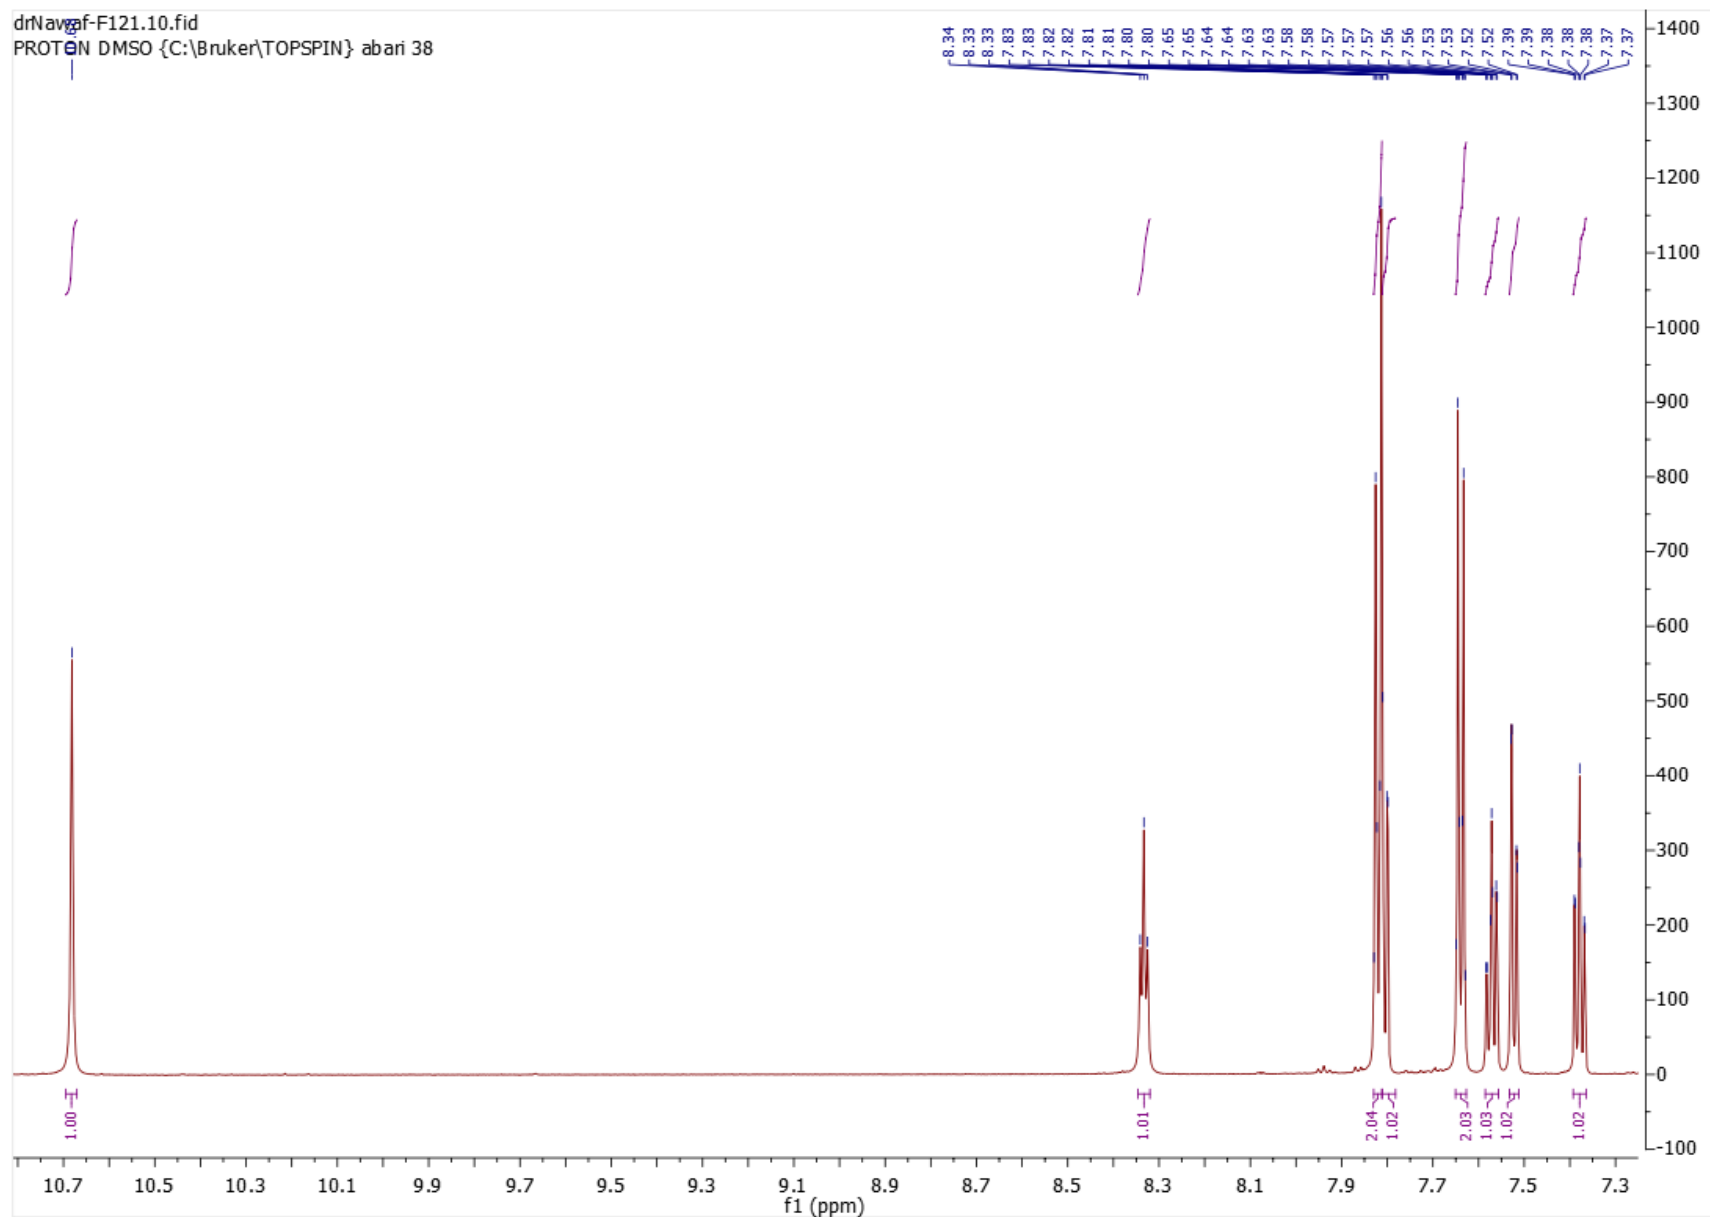

17a

drNawaf-F-121-R.10.fid  
C13CPD DMSO (C:\Bruker\TOPSPIN) Lab 2

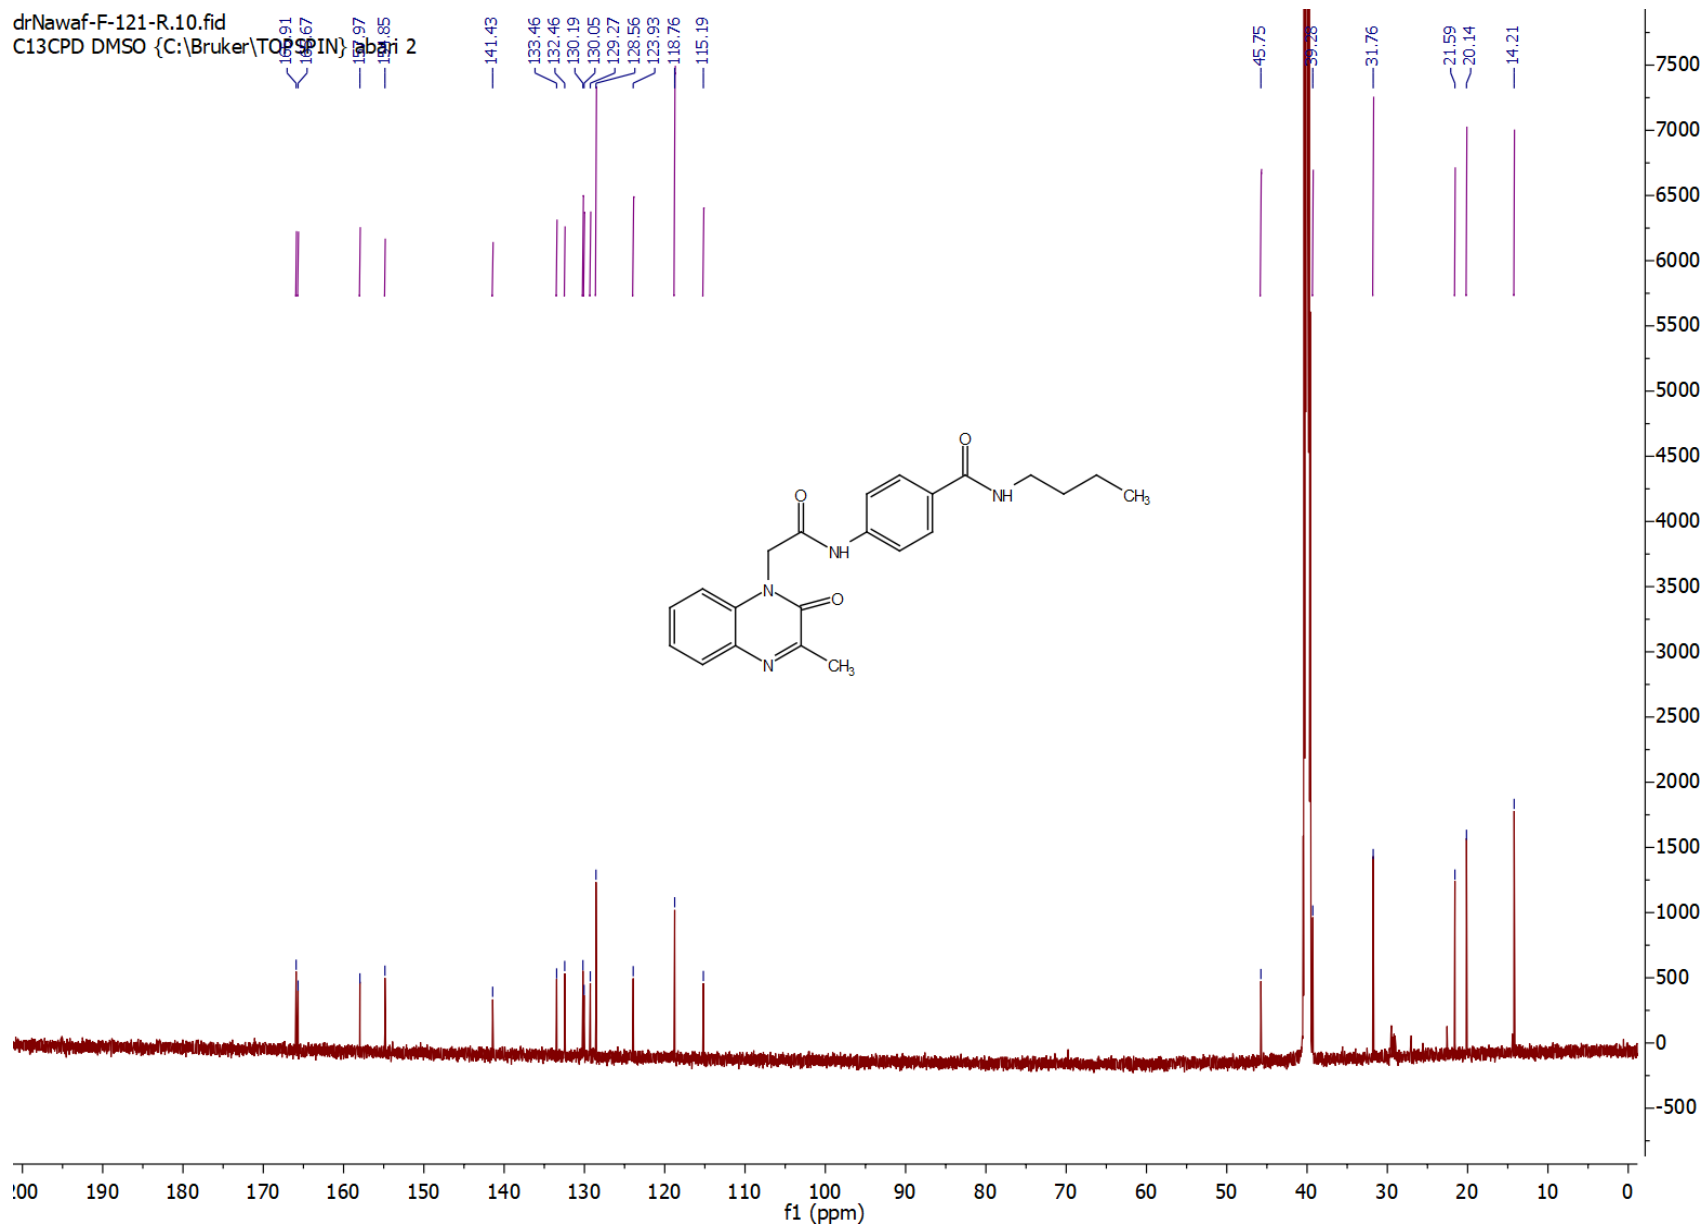

17a

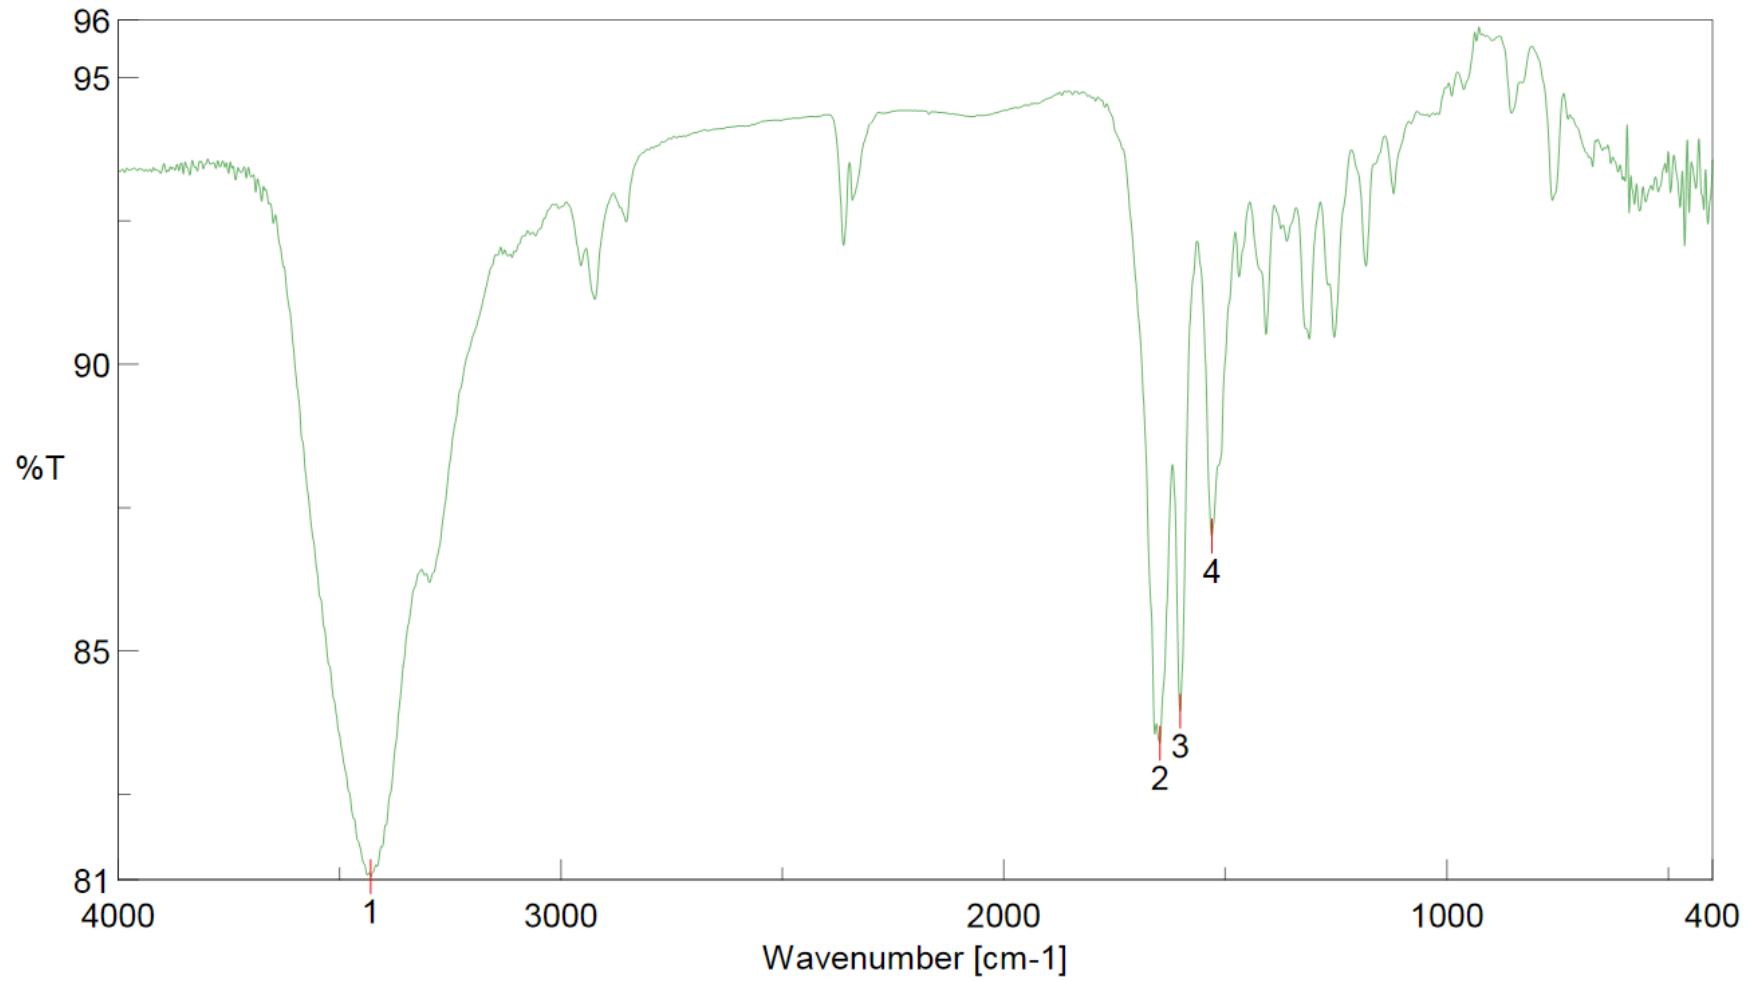

17a

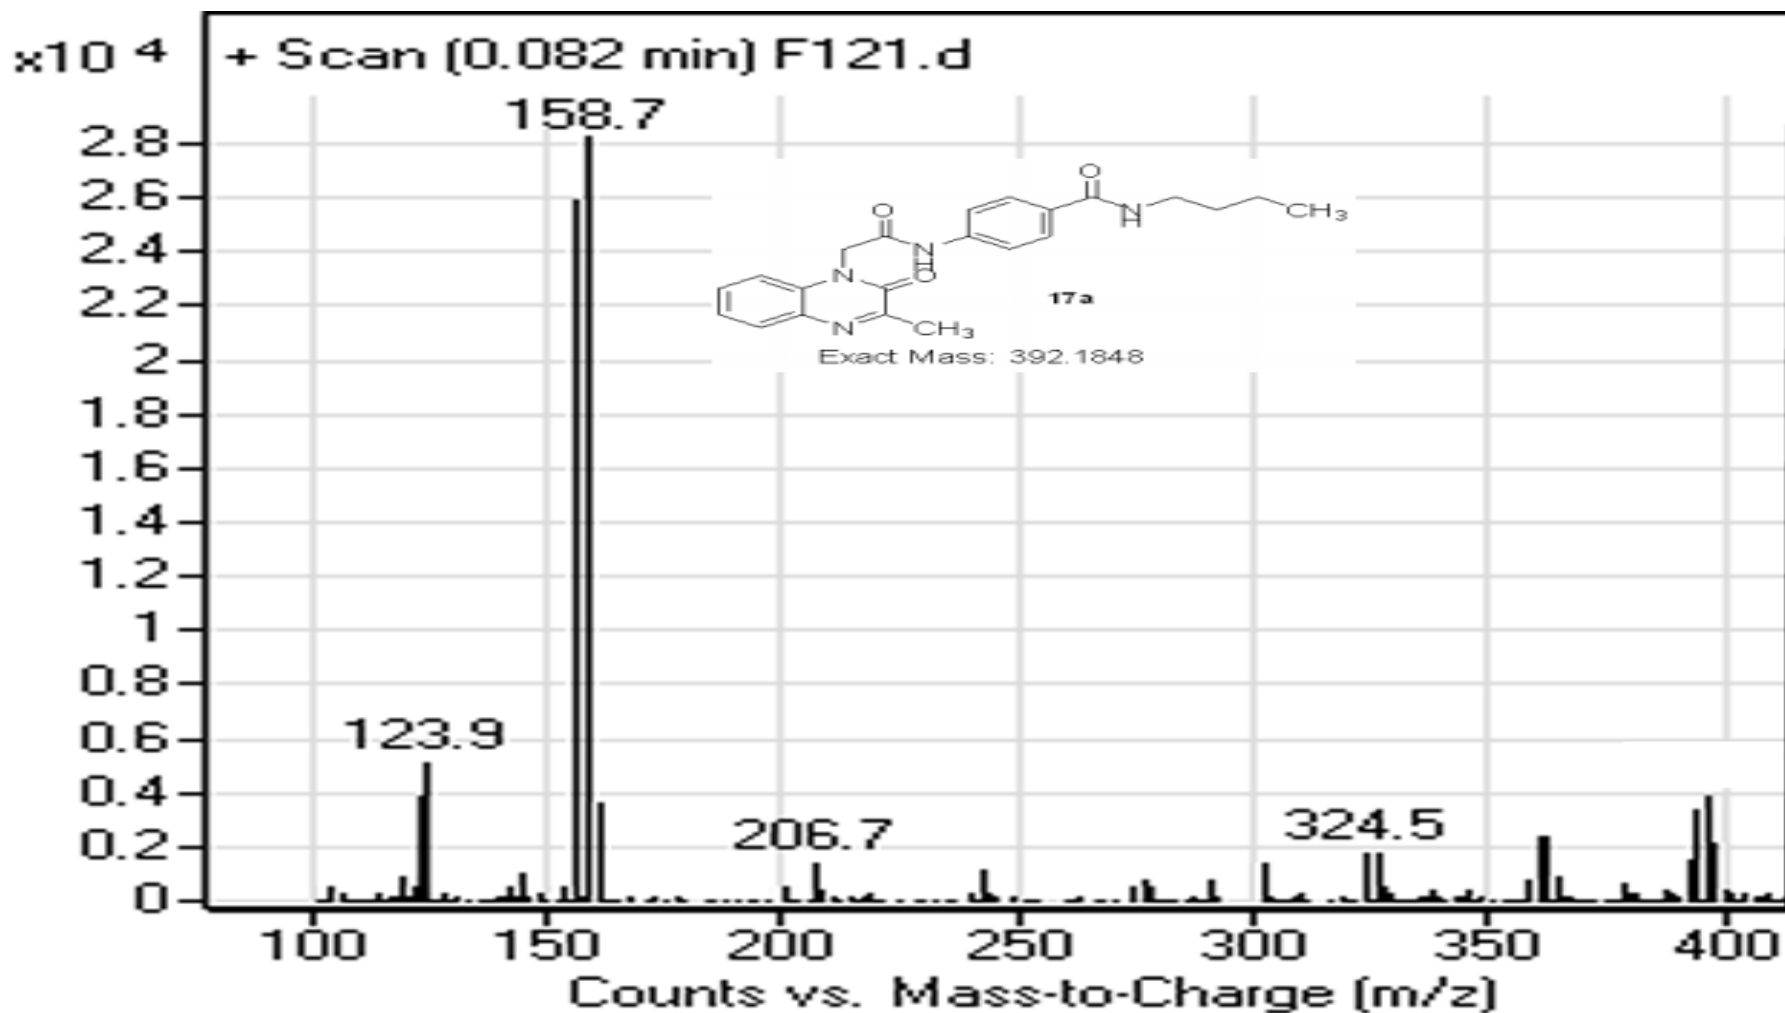

17b

drNawaf-F-17.13.fid  
PROTON DMSO (CaBruker) TOPSPIN - aban 39

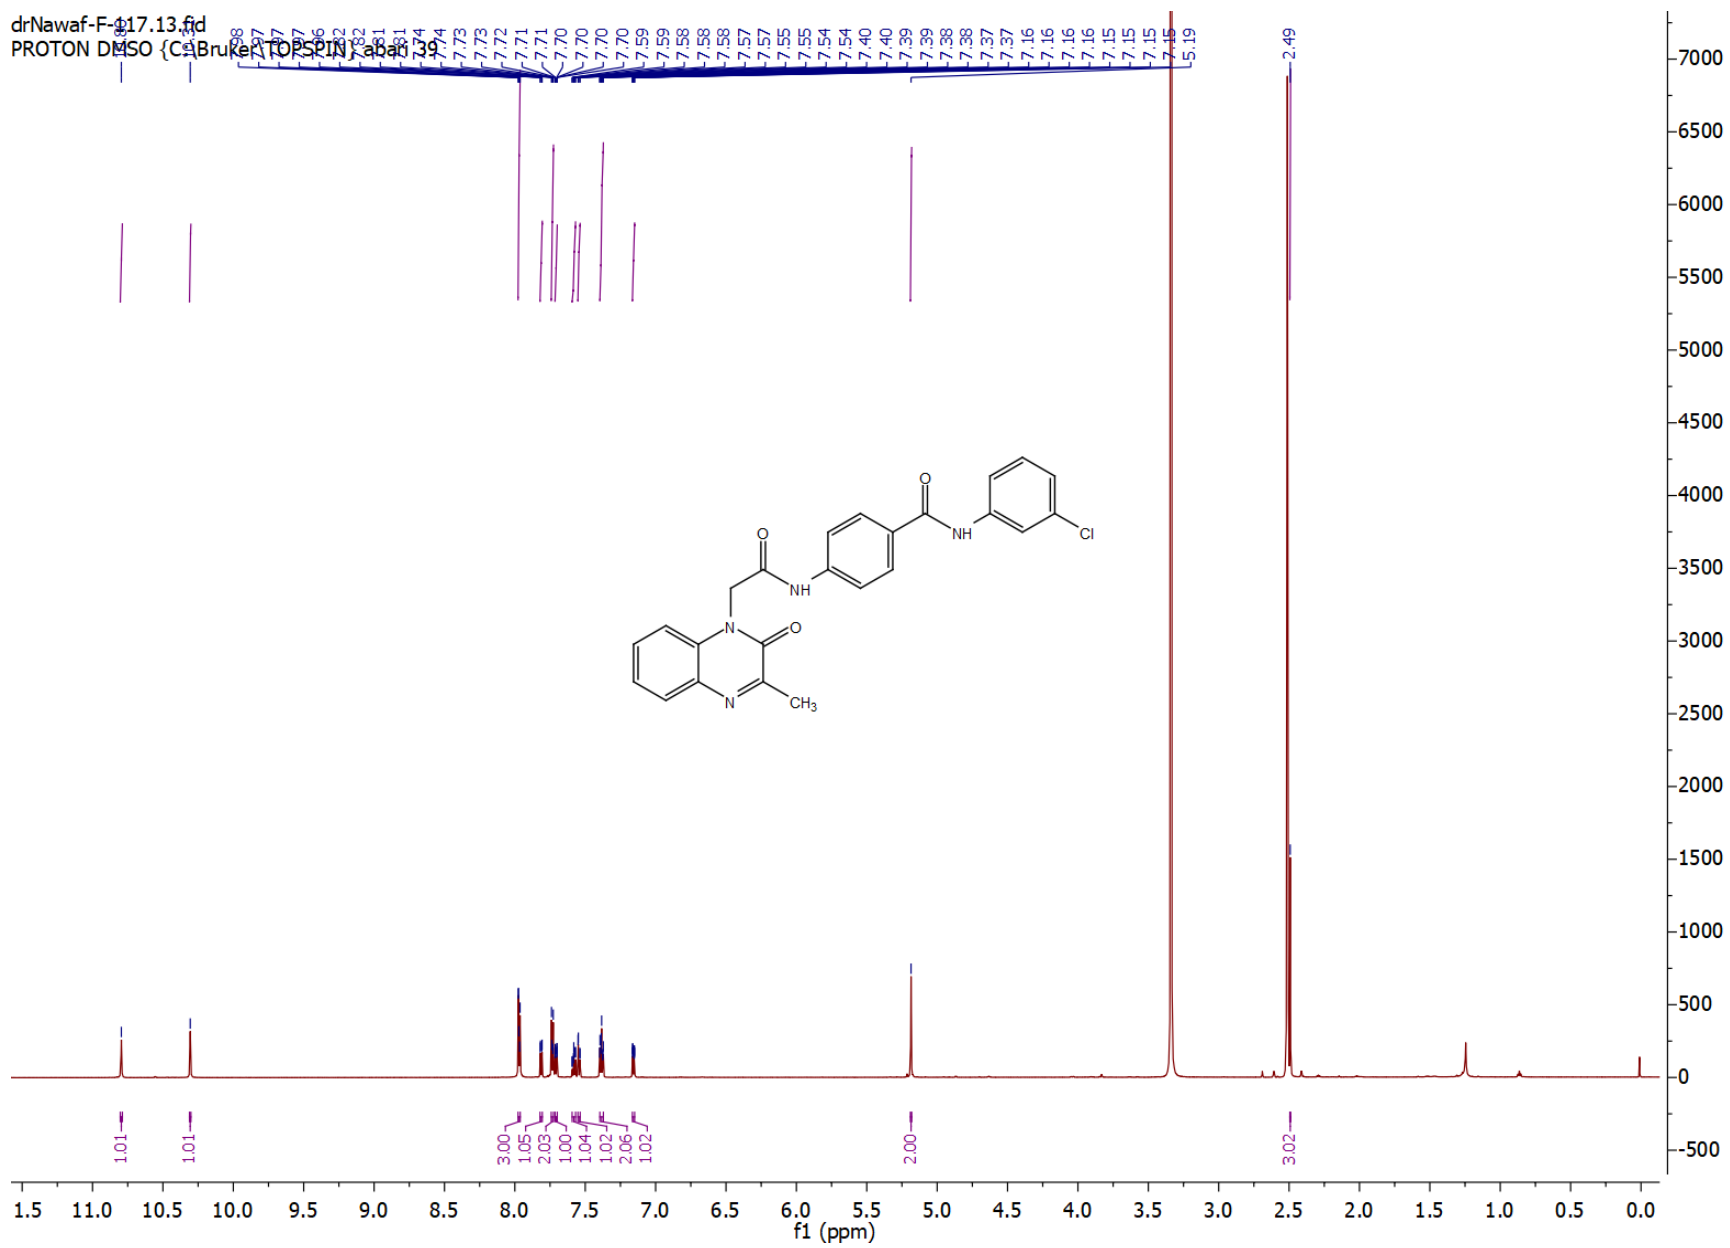



17b

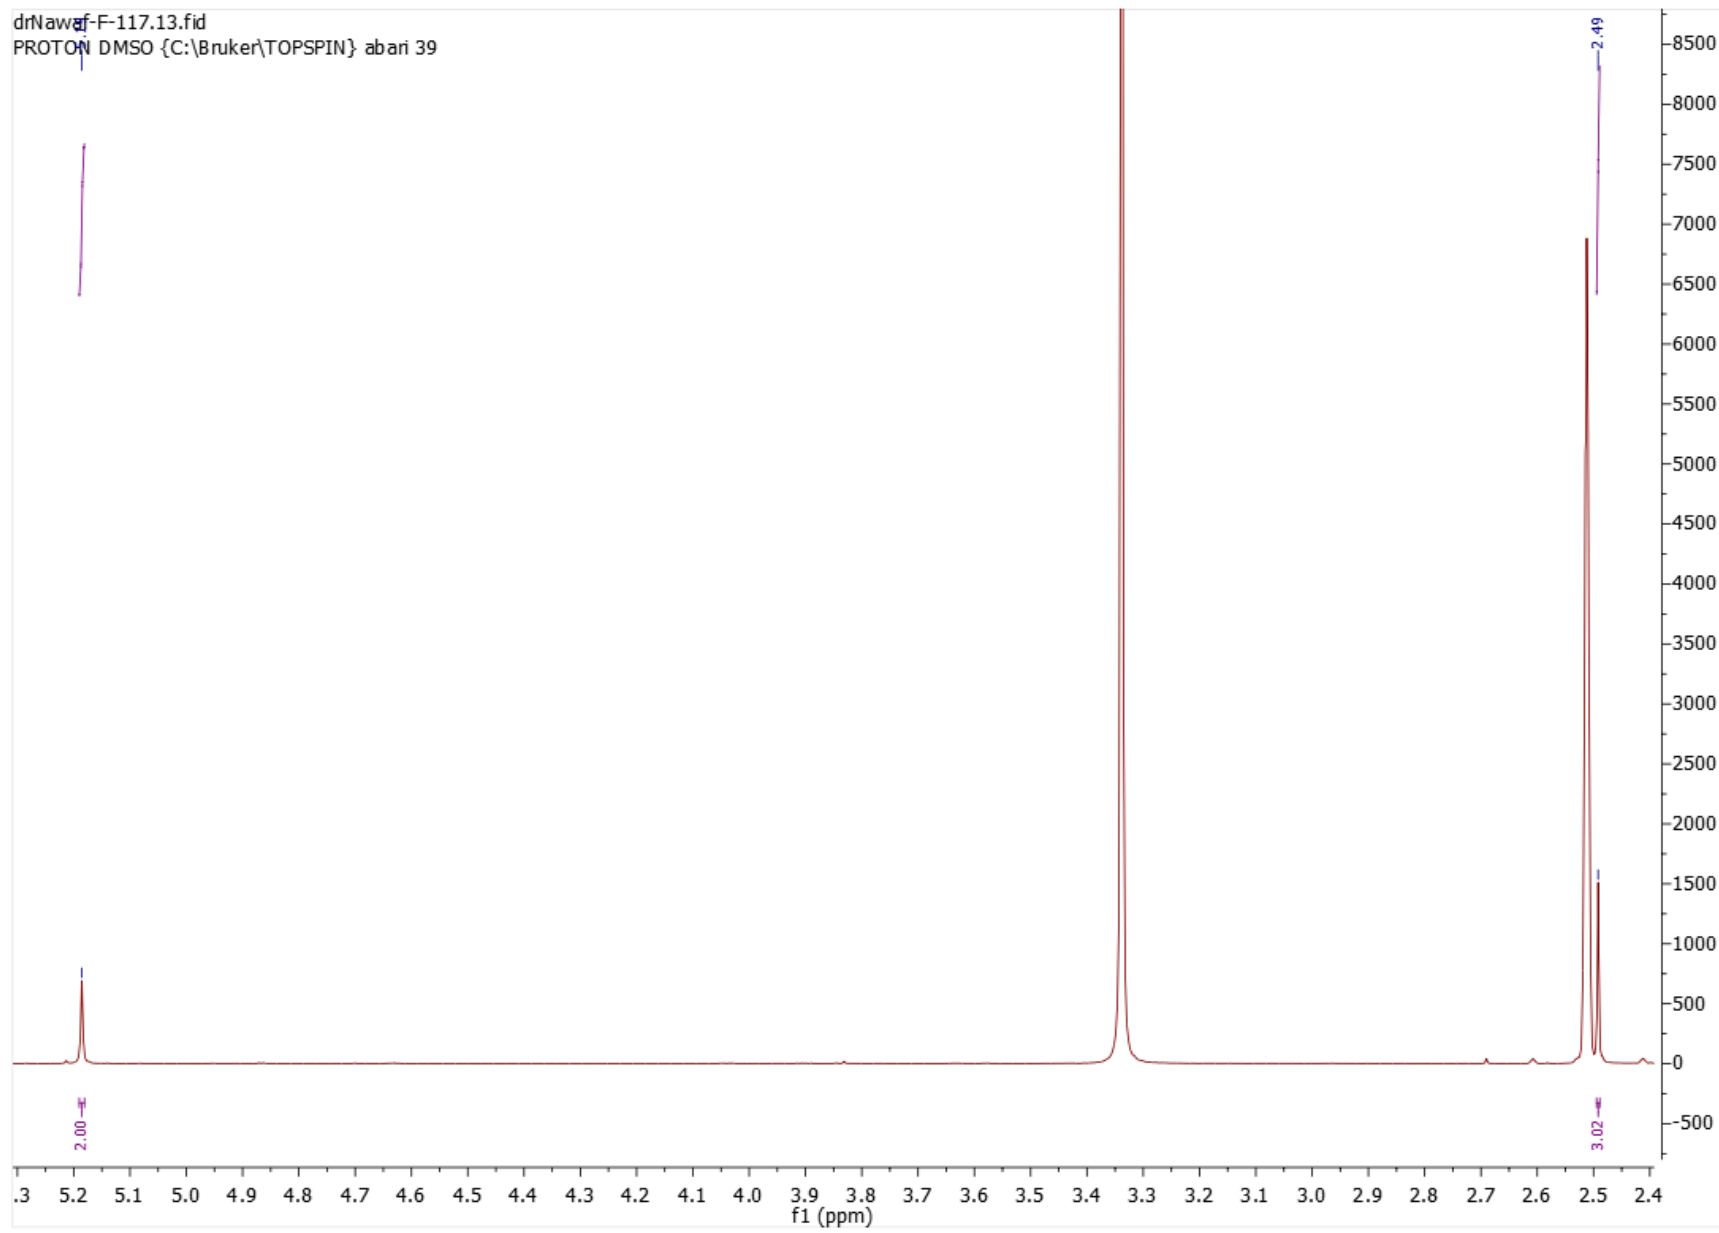

17b

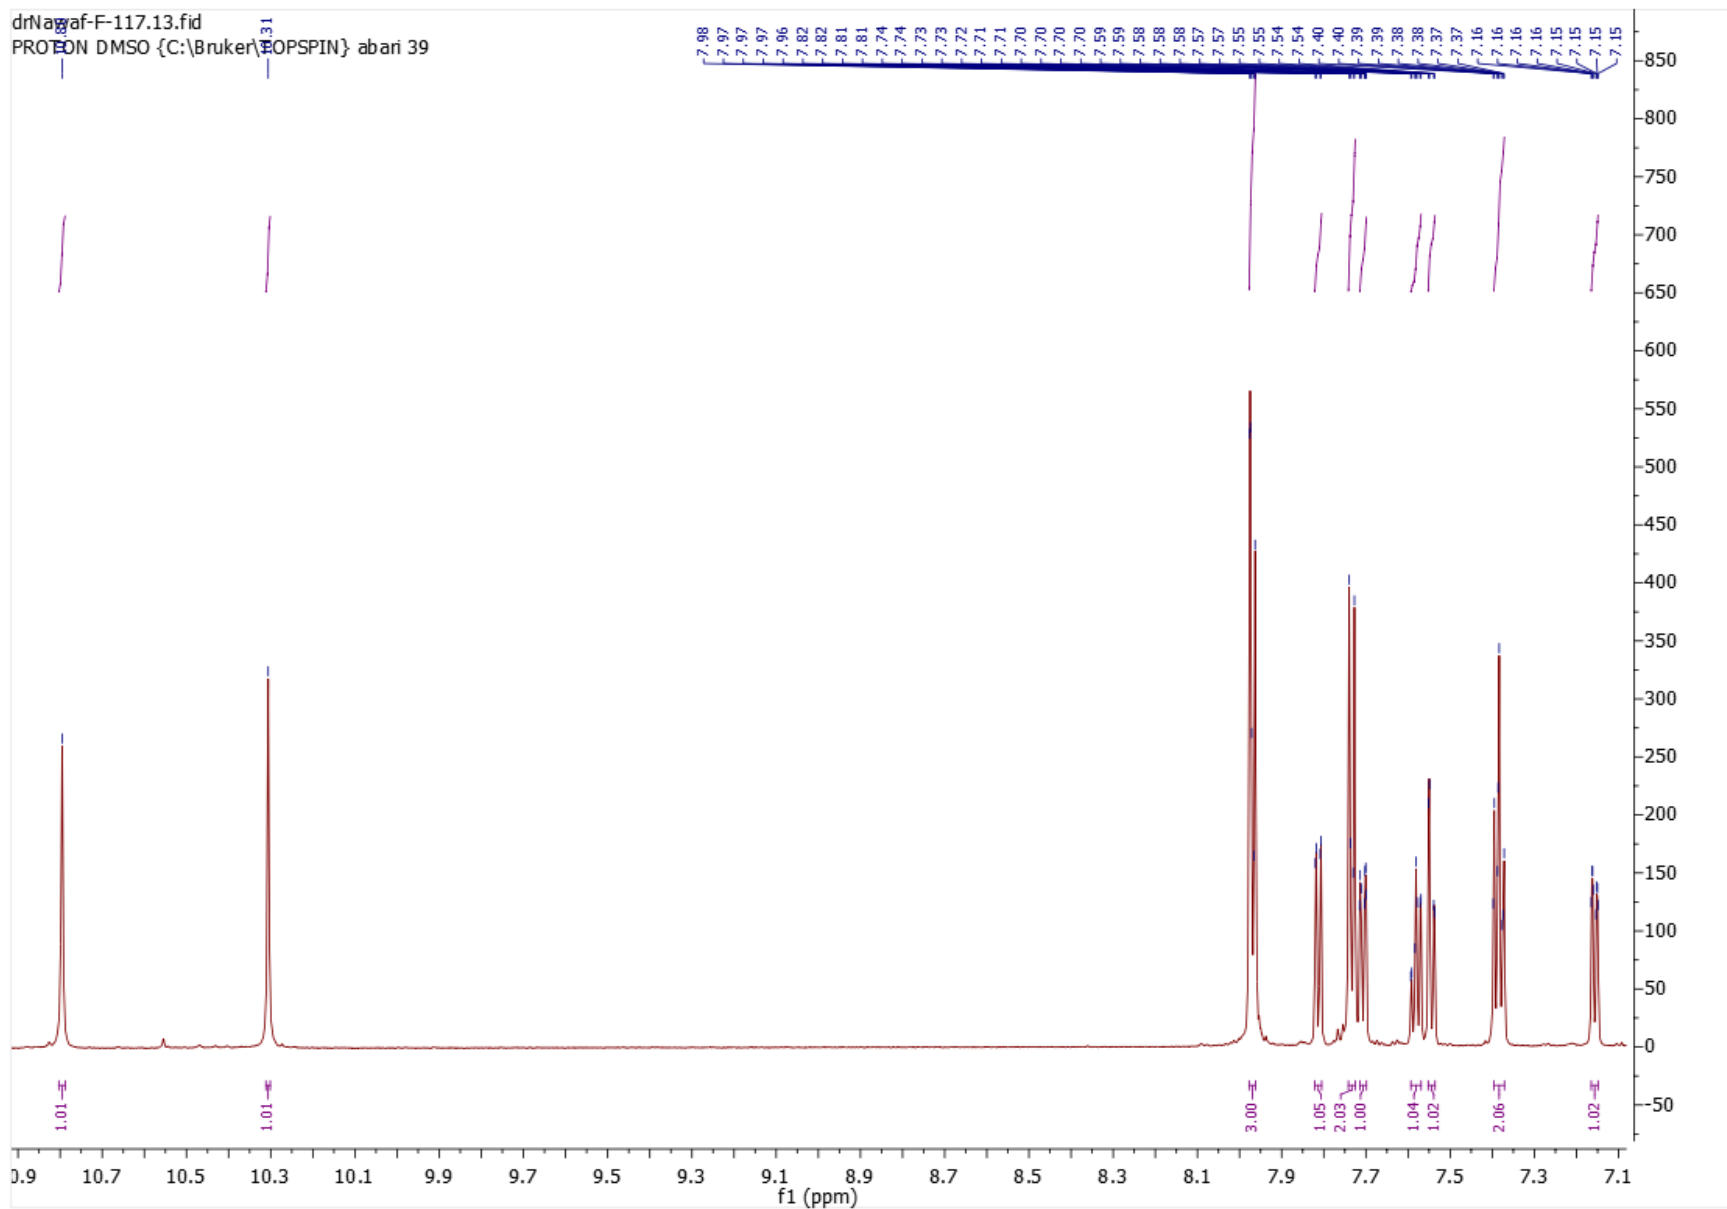

17b

drNawaf-F117.11.fid  
C13CPD DMSO {C:\Bruker\TOPSPIN\lab\17b\}

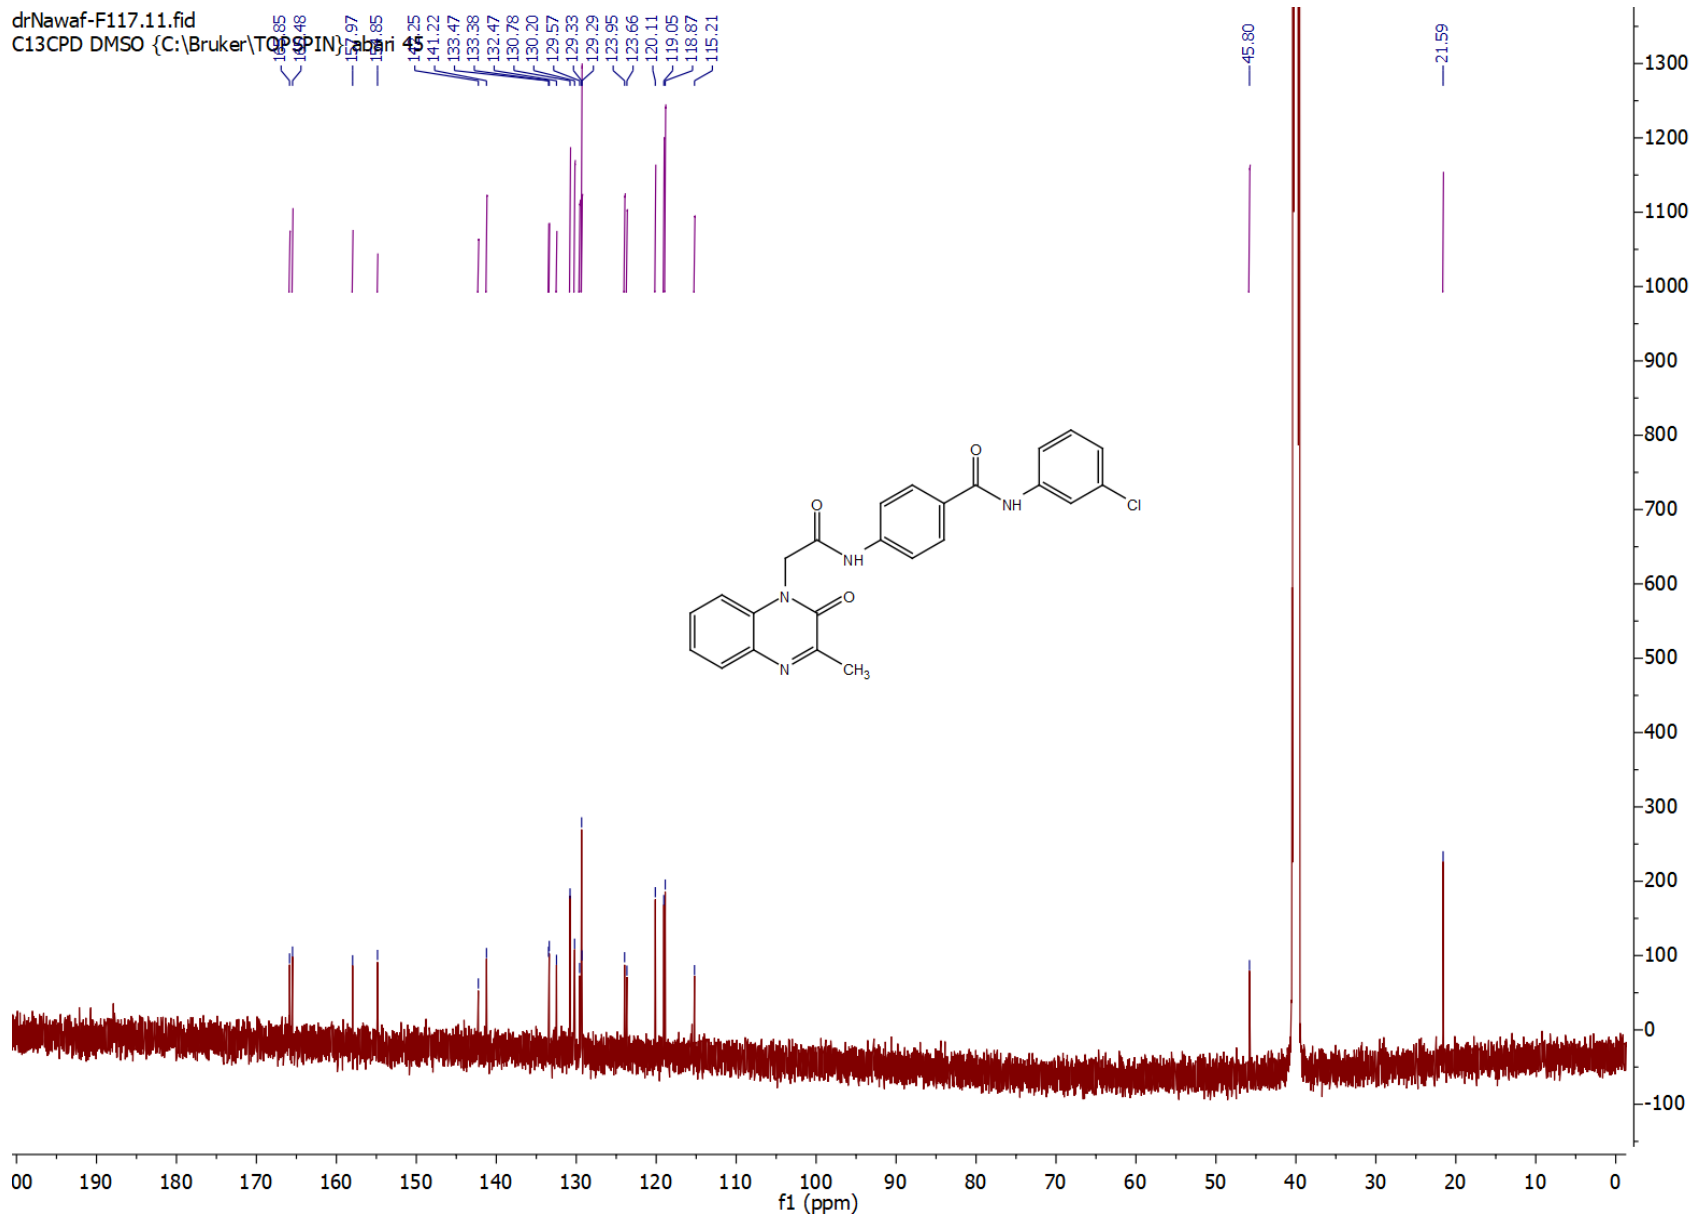

17b

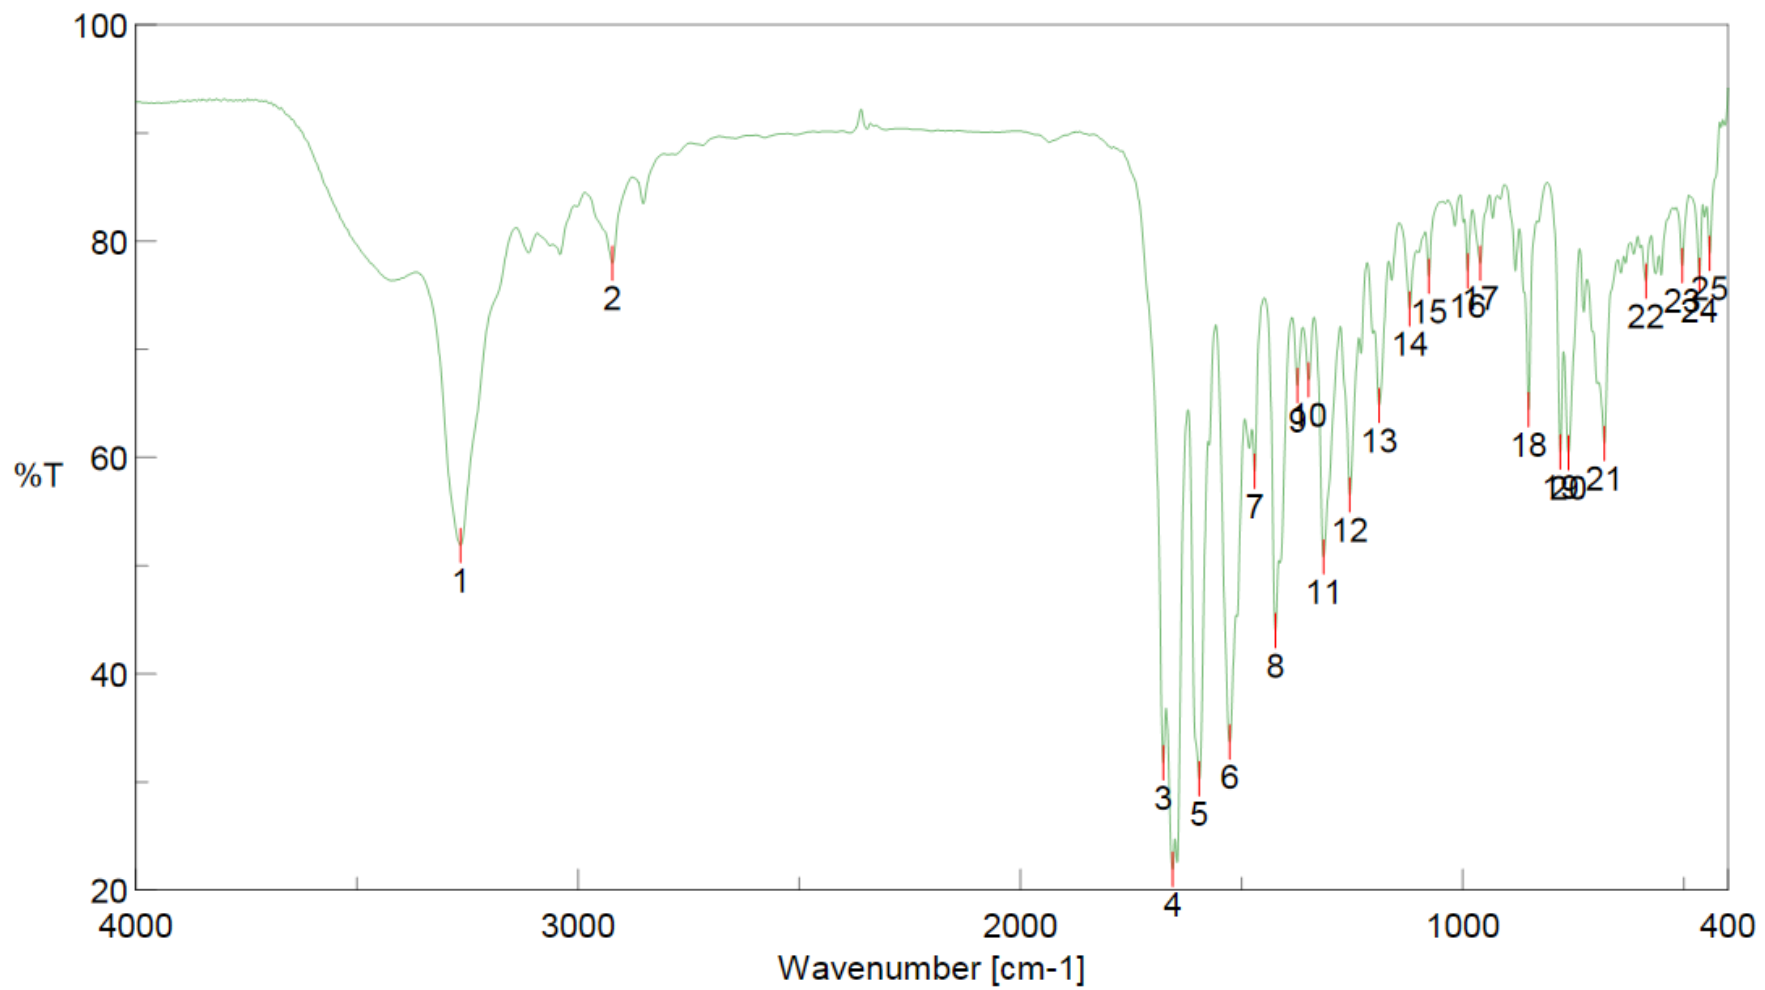

17b

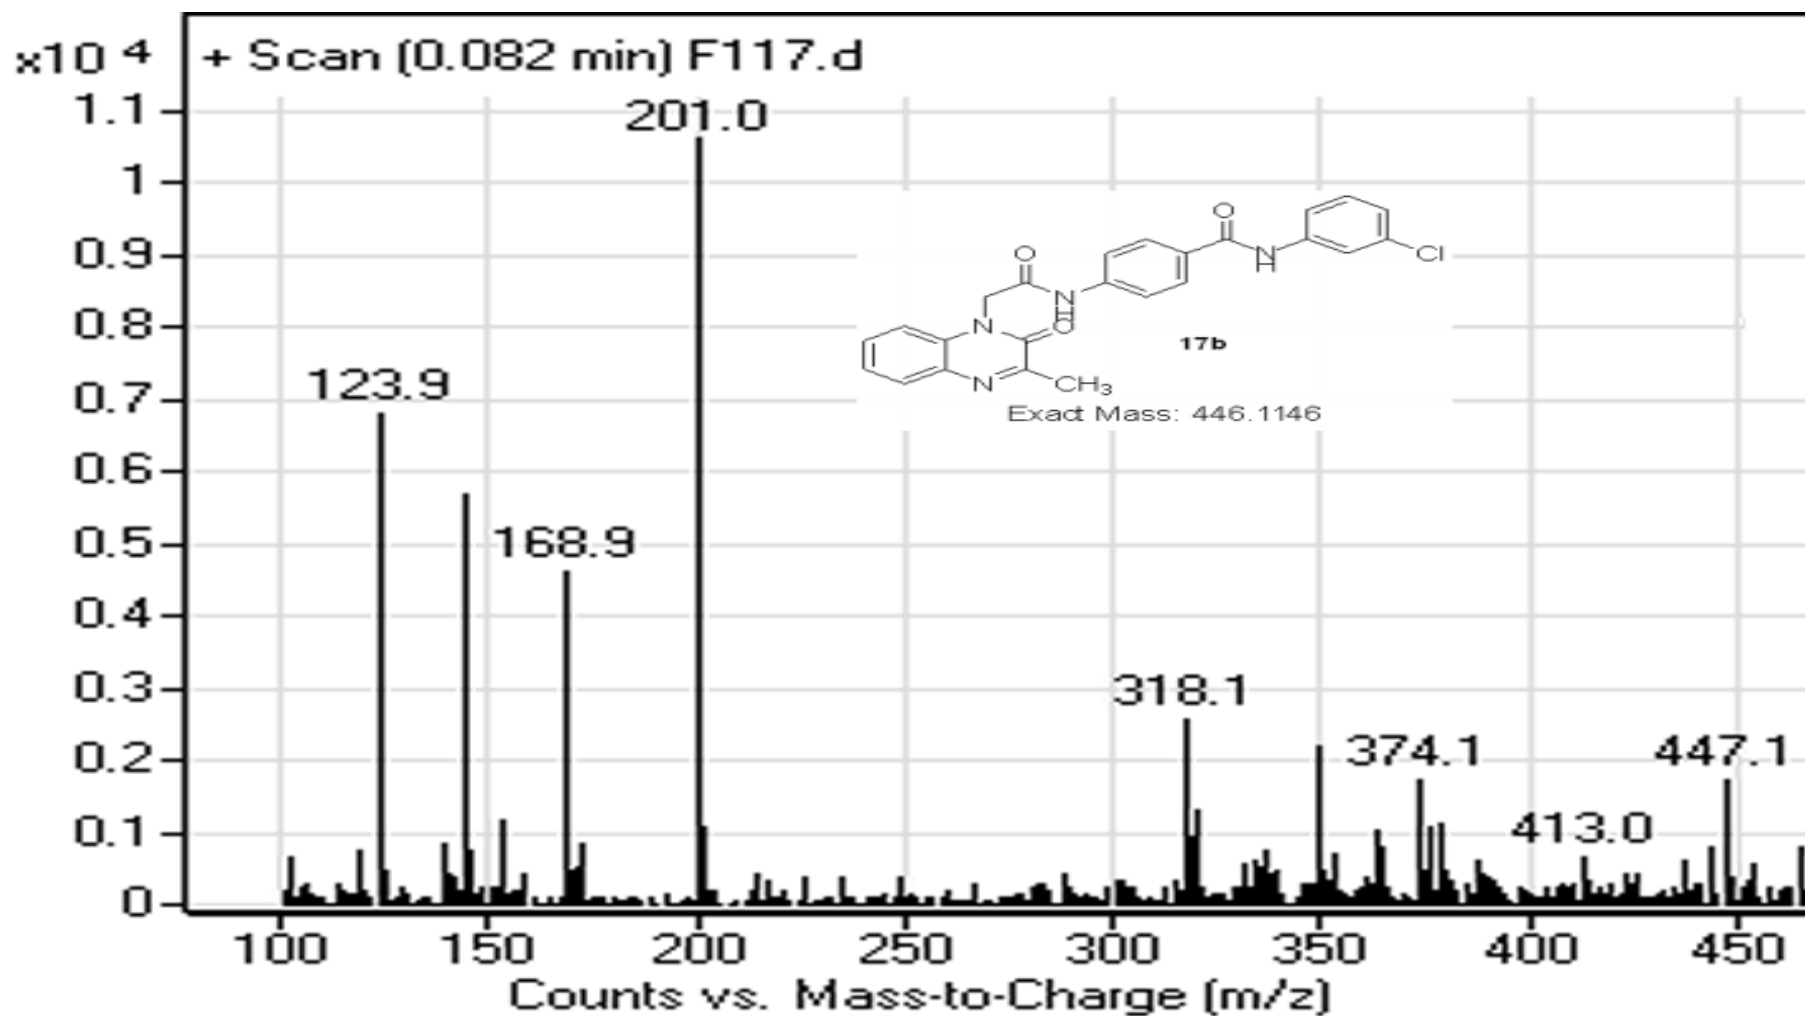

17c

drNawaf-F-142.10.fid  
PROTON DMSO (C:\Bruker\TOPSPIN) abar 20

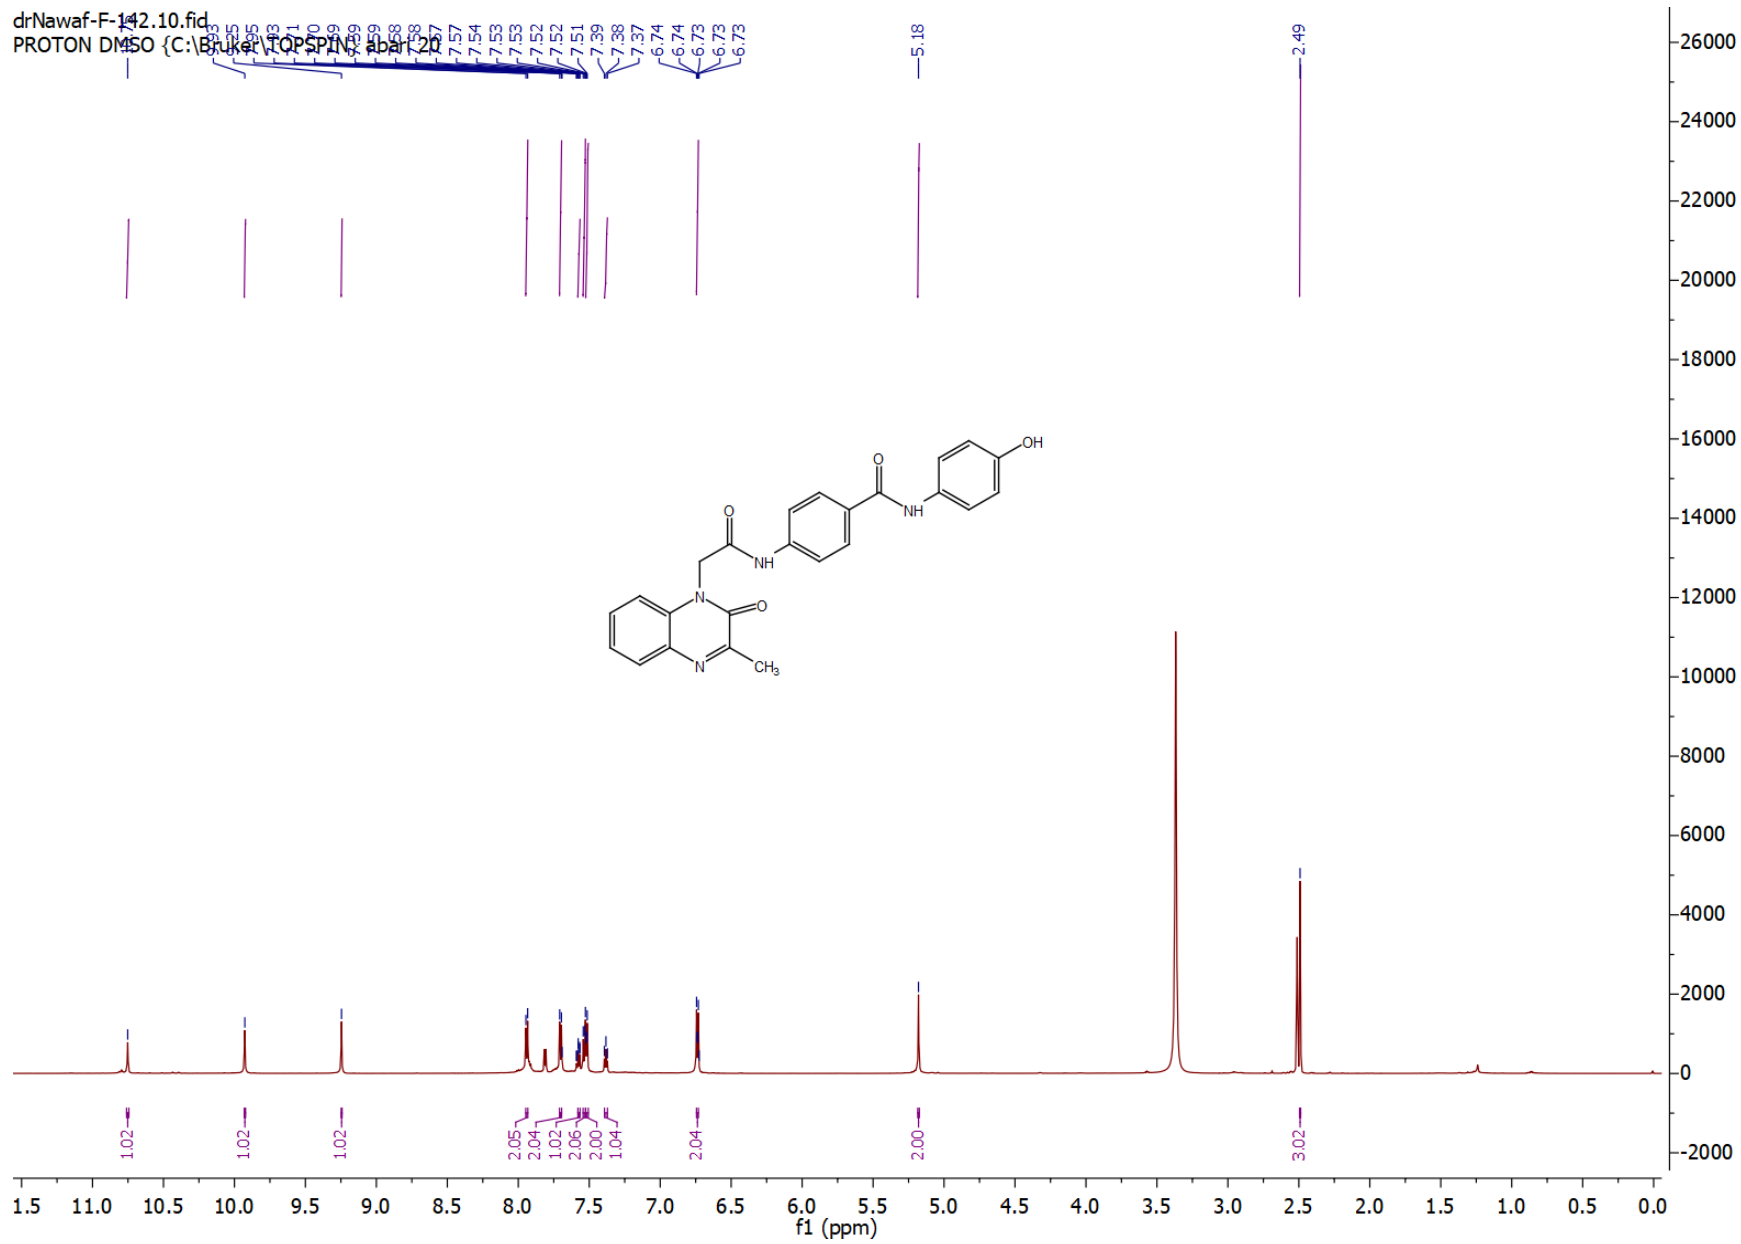

17c

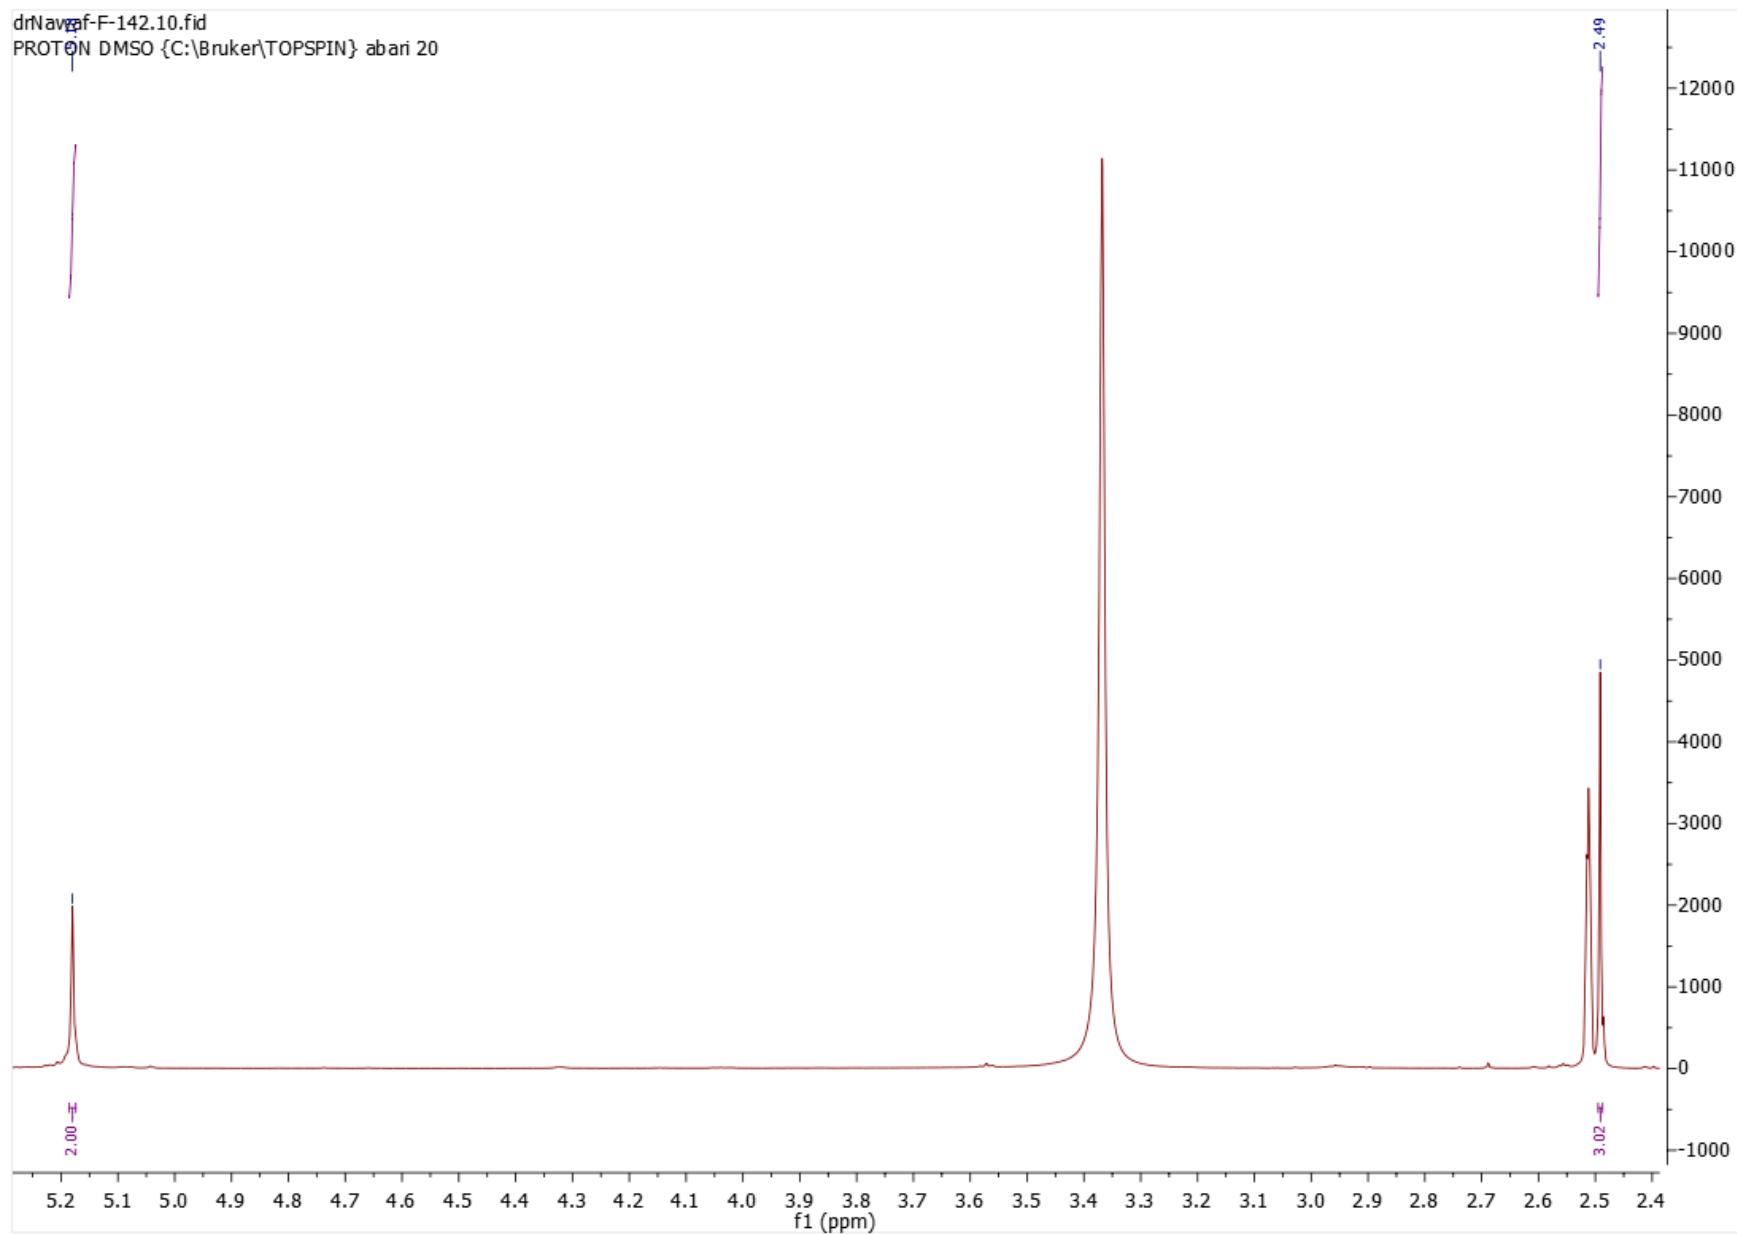

17c

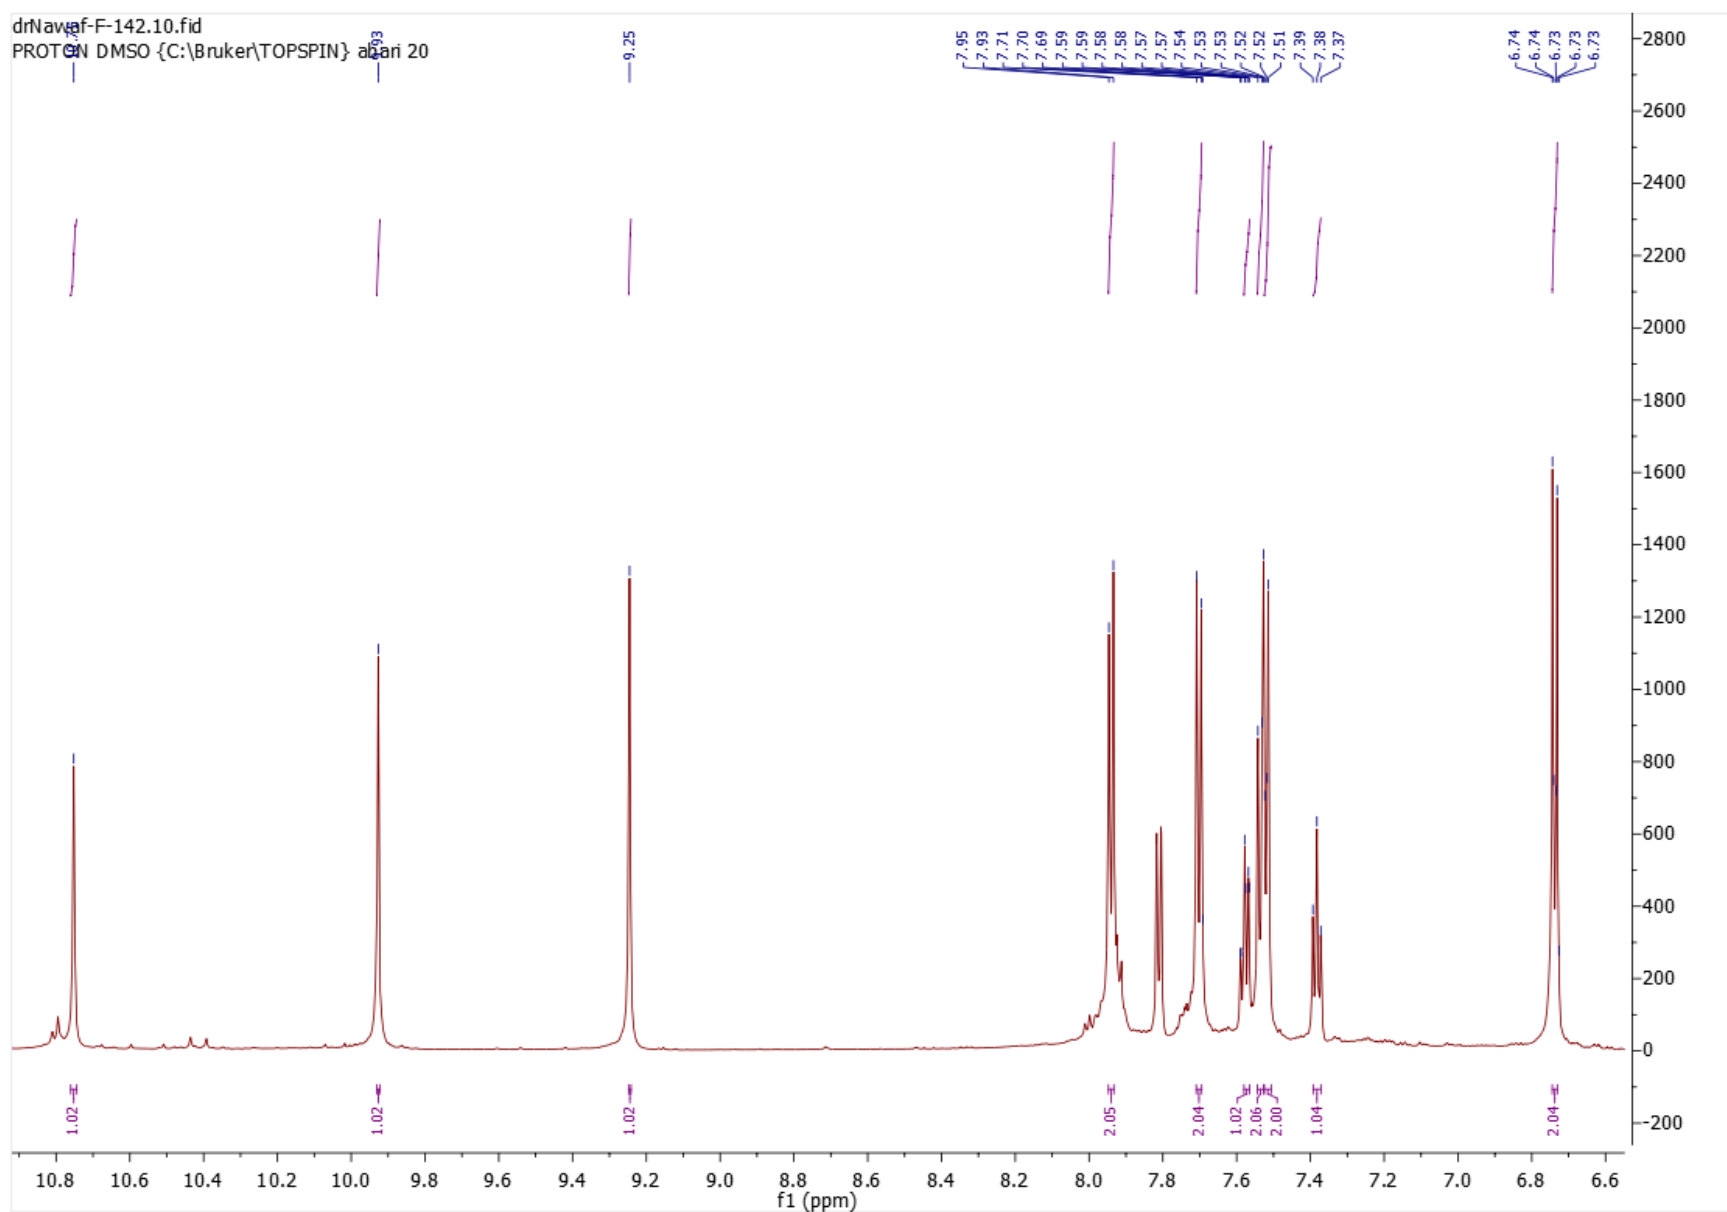



17c

drNawaf-F-142.11.fid  
C13CPD DMSO (C:\Bruker\TOPSPIN) 20

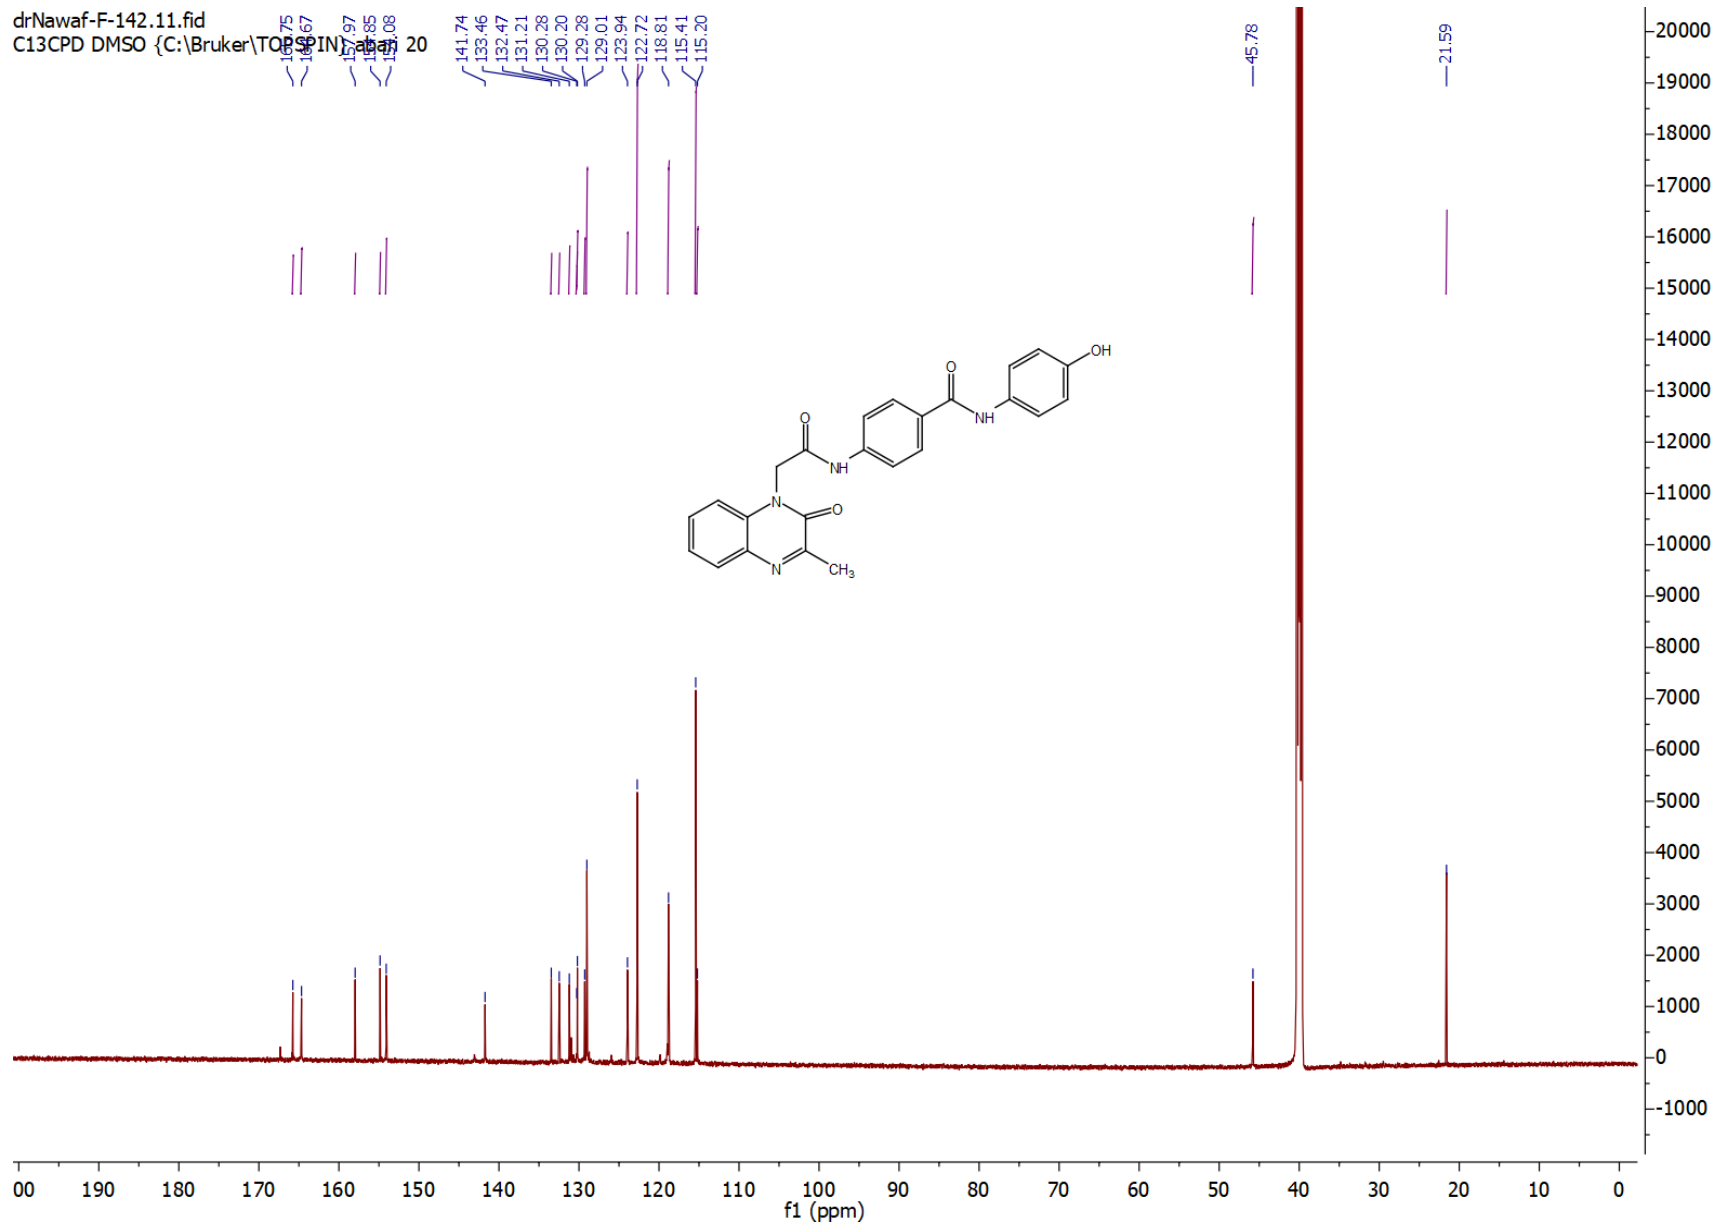

17c

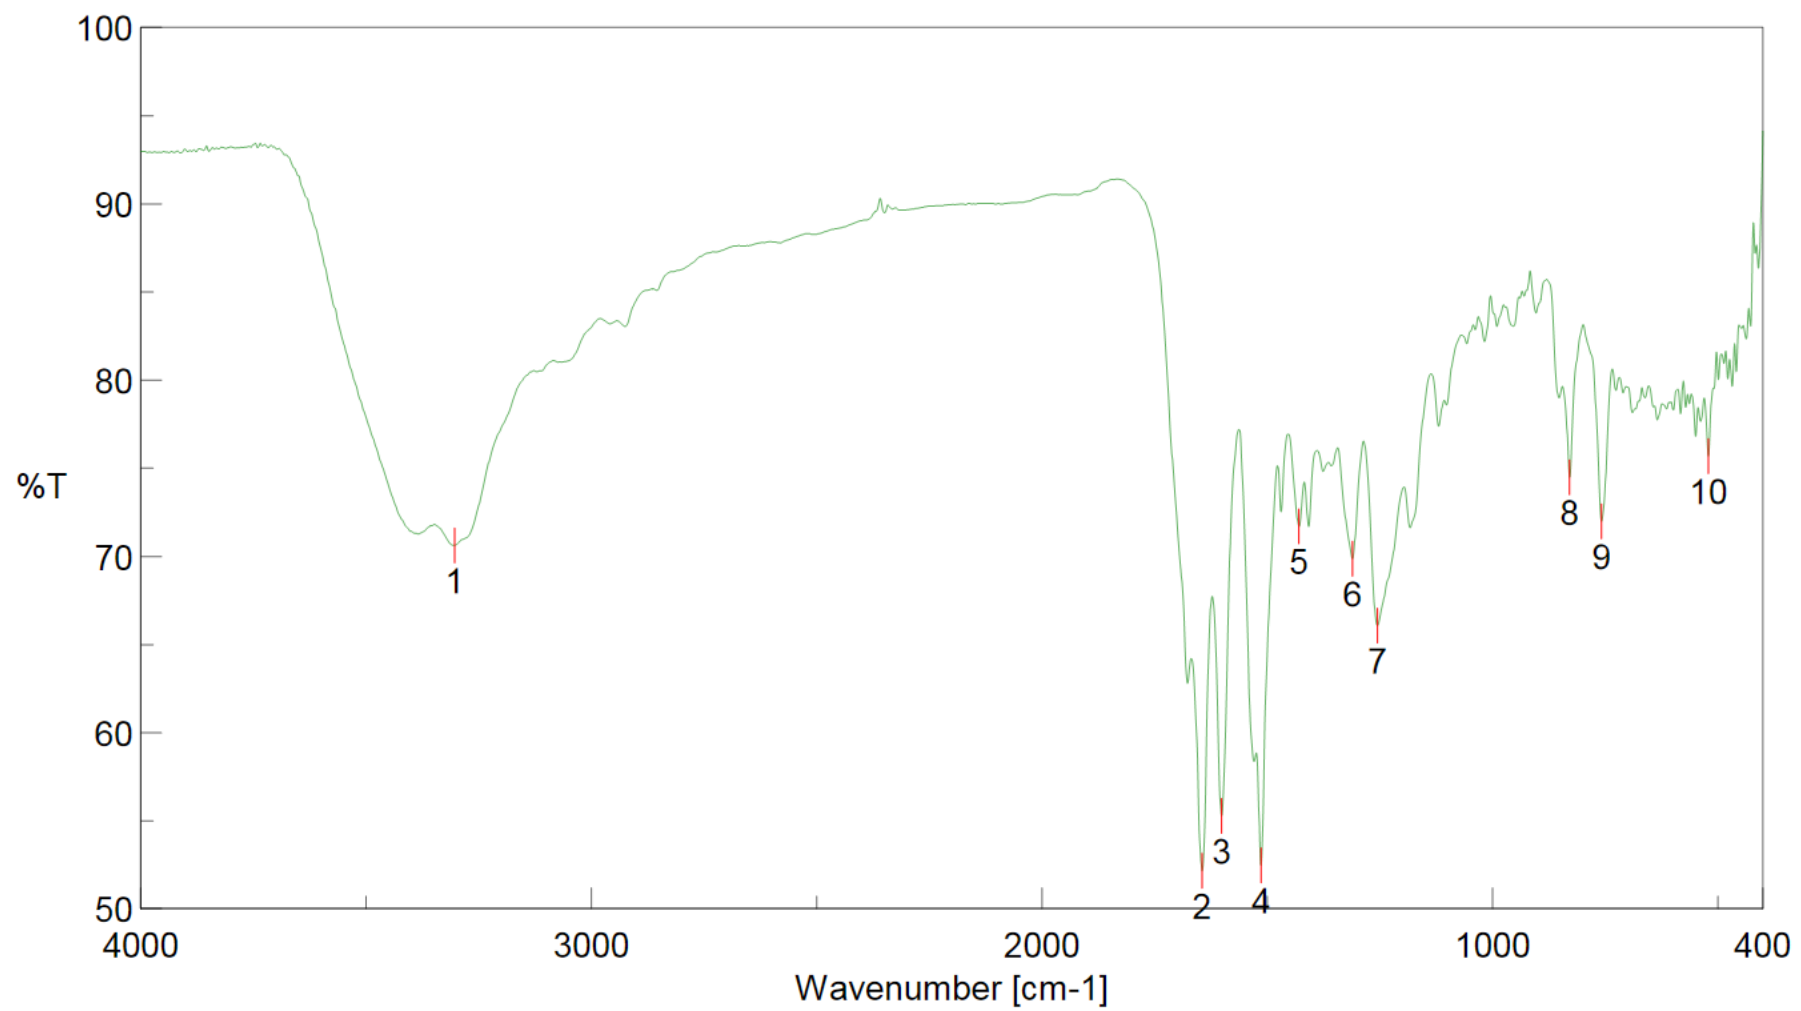

17c

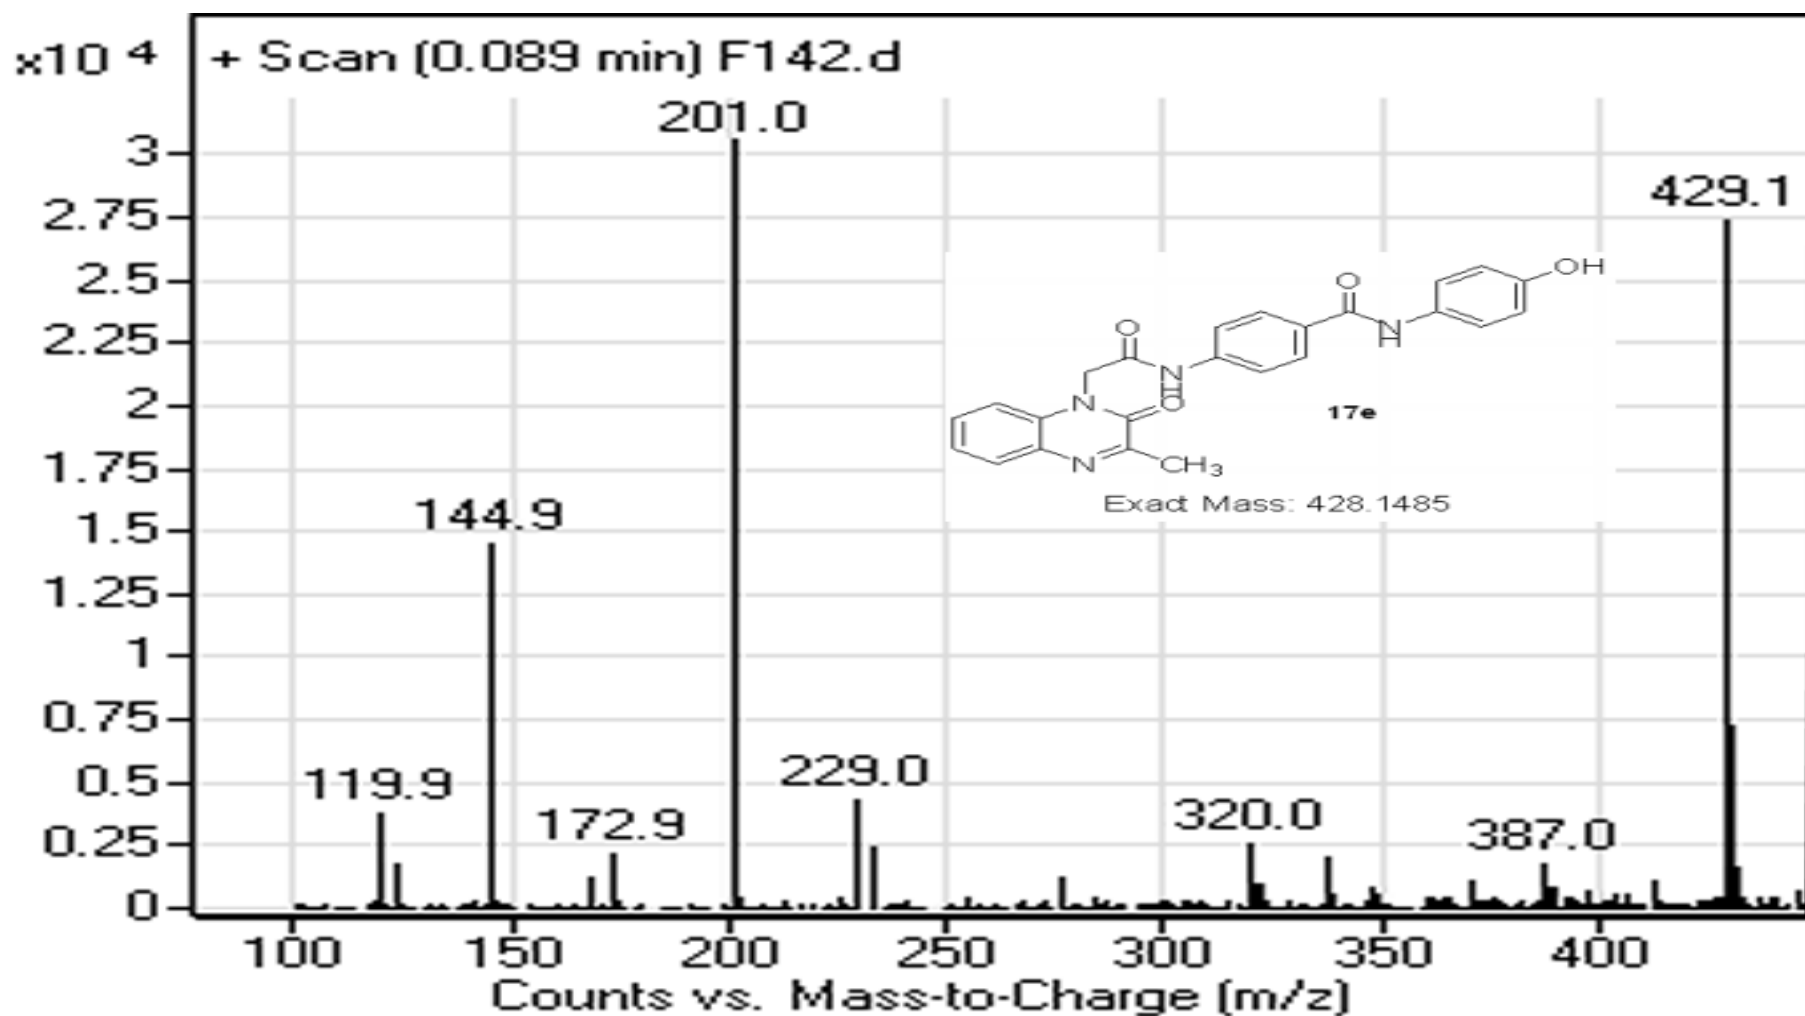

17d

drNawaf-F-134-10.fid  
PROTON DMSO-d6 (C: Bruker, TOPSPIN) aban, 2

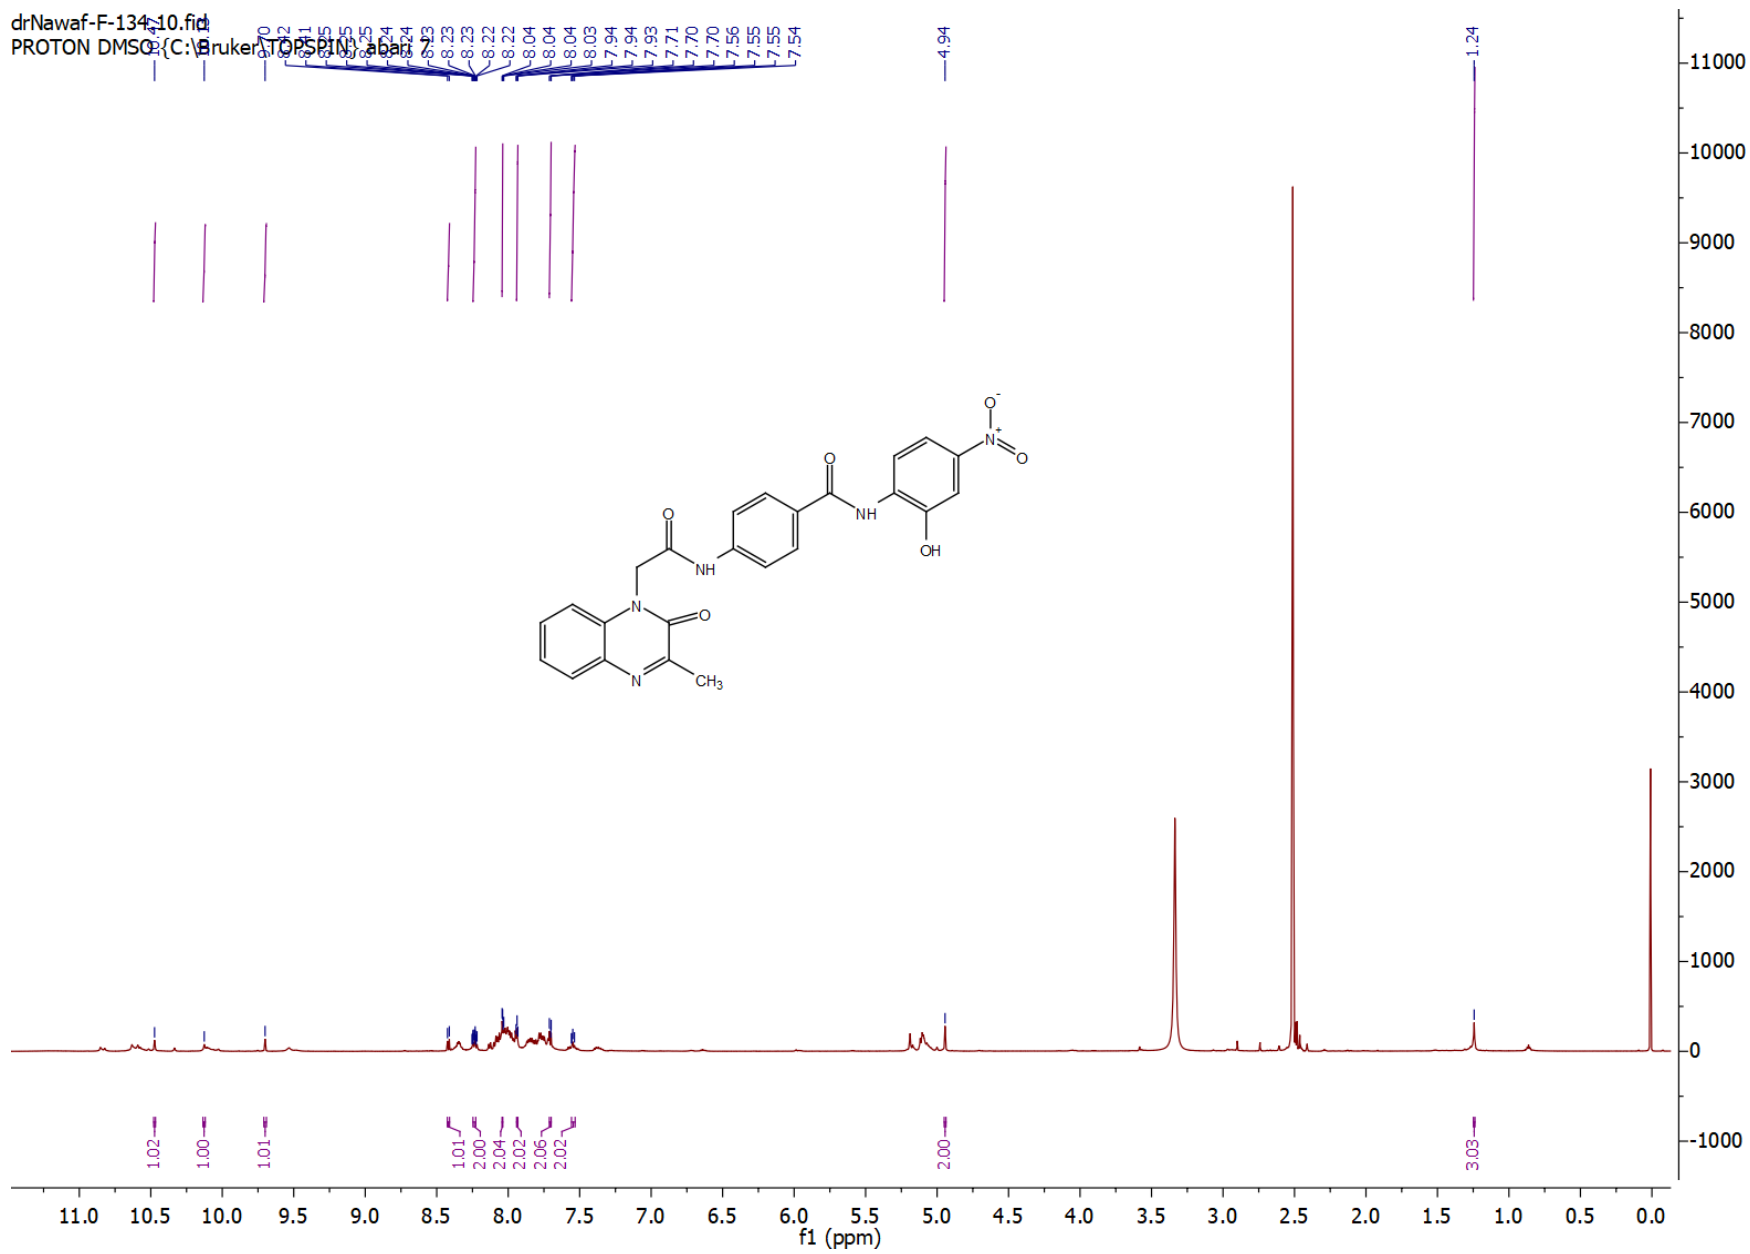

17d

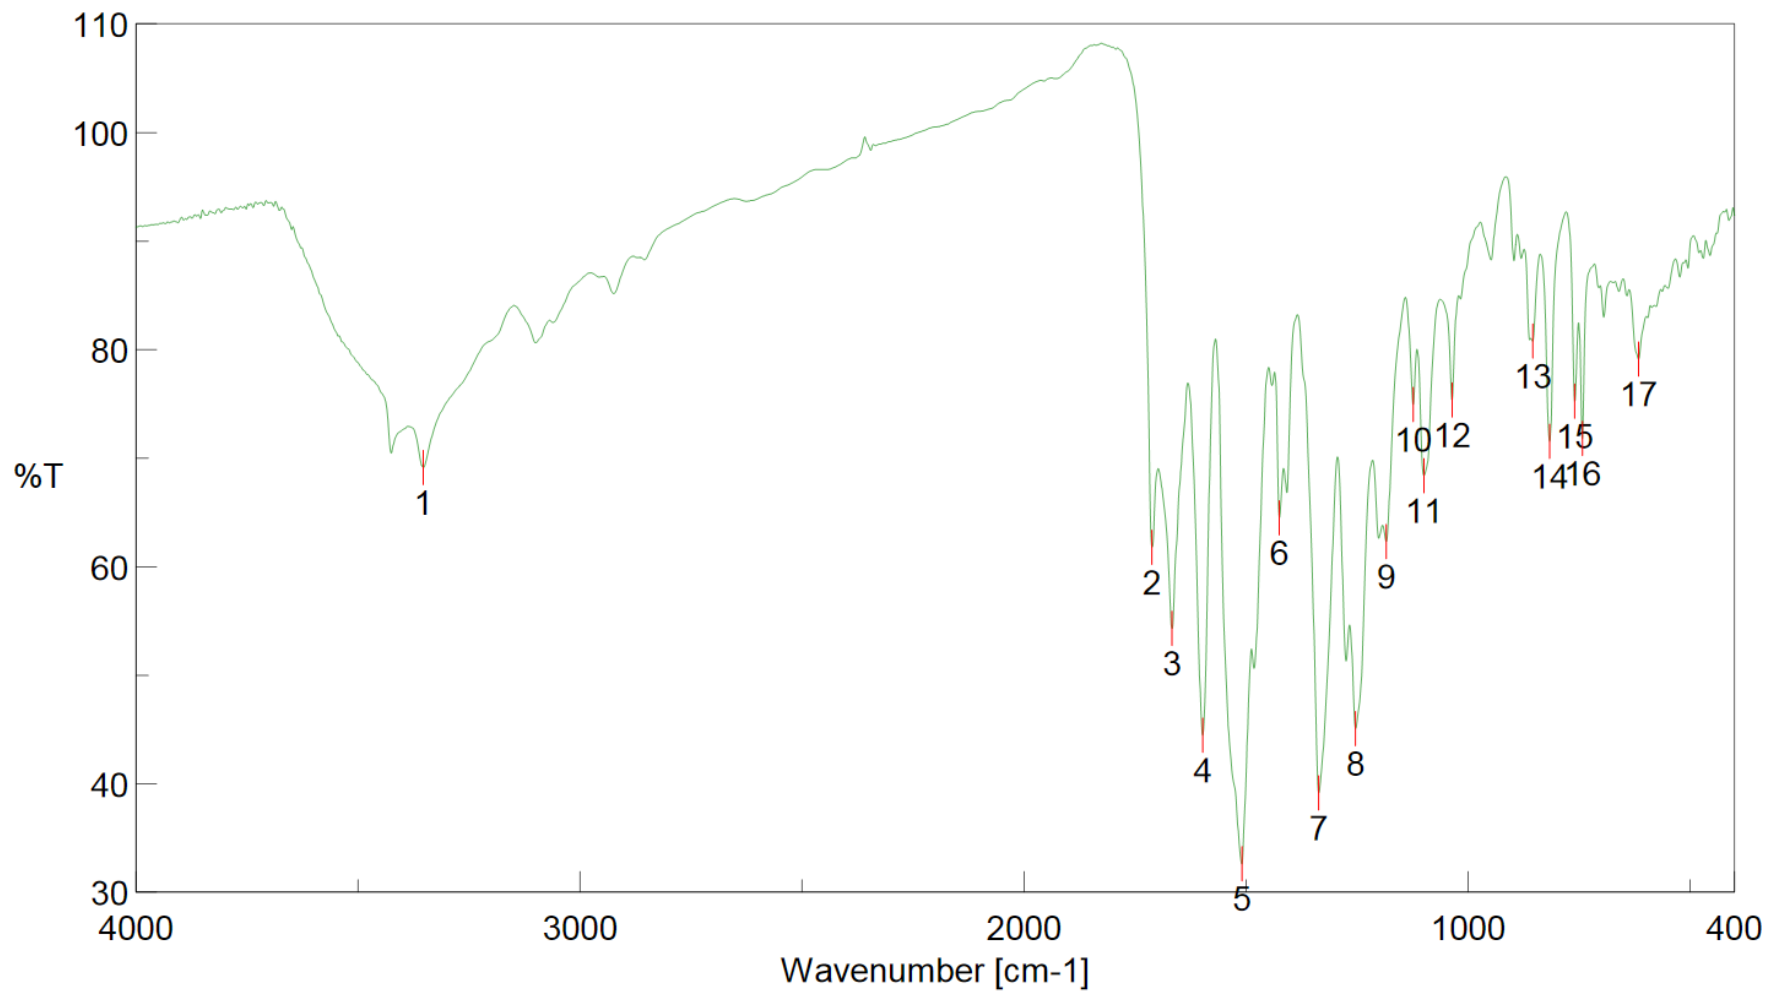

17d

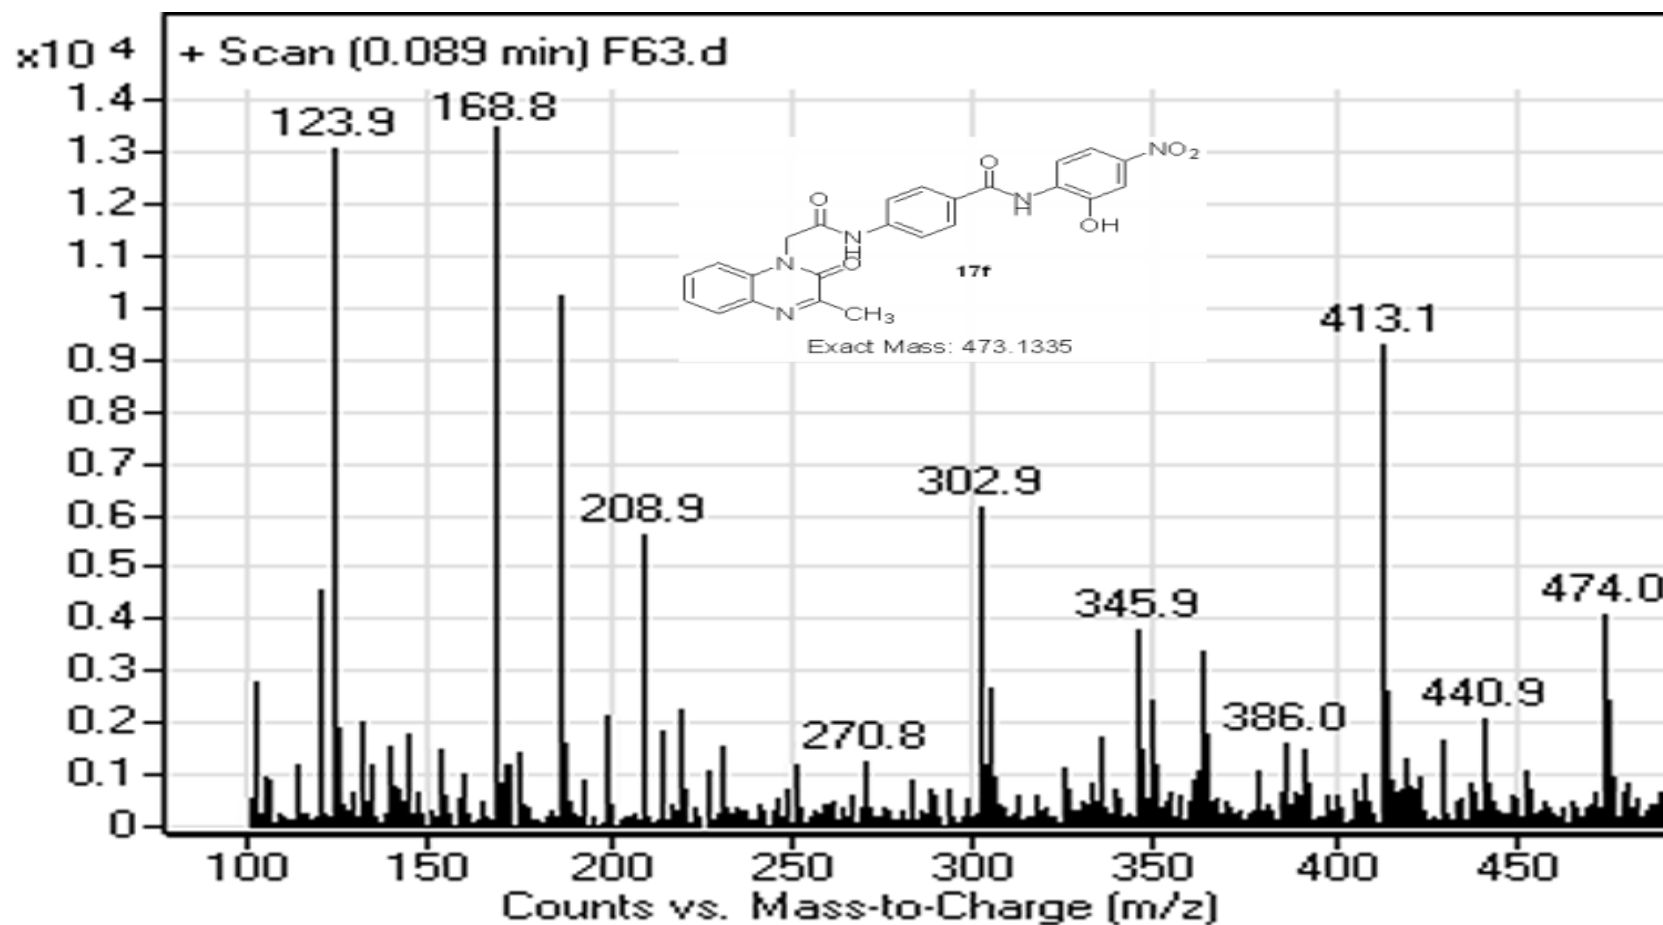

18

drNawaf-F-148.10.fid  
PROTON DMSO {C:\Bruker\TOPSPIN} abari 4

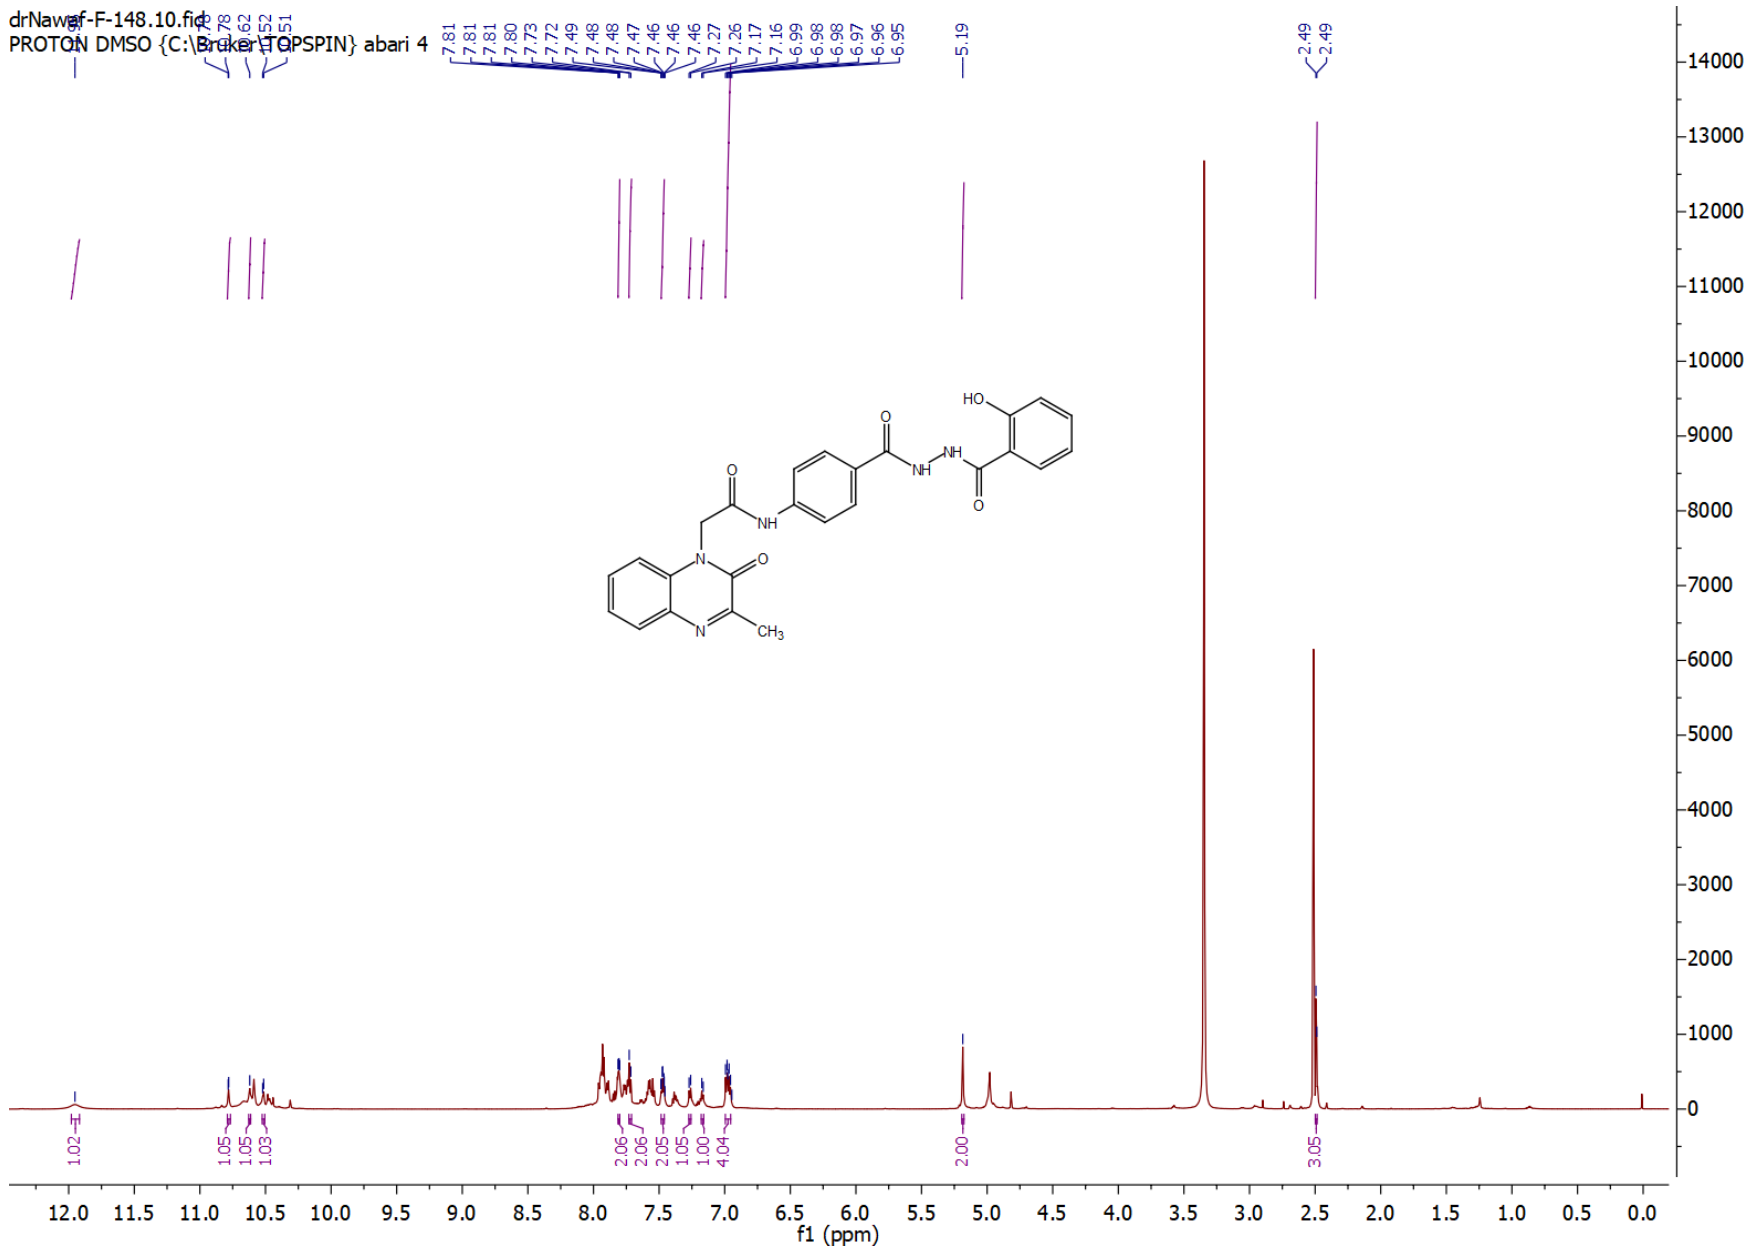

18

drNawaf-F-148.11.fid  
C13CPD DMSO {C:\Bruker\TOPSPIN\data\18

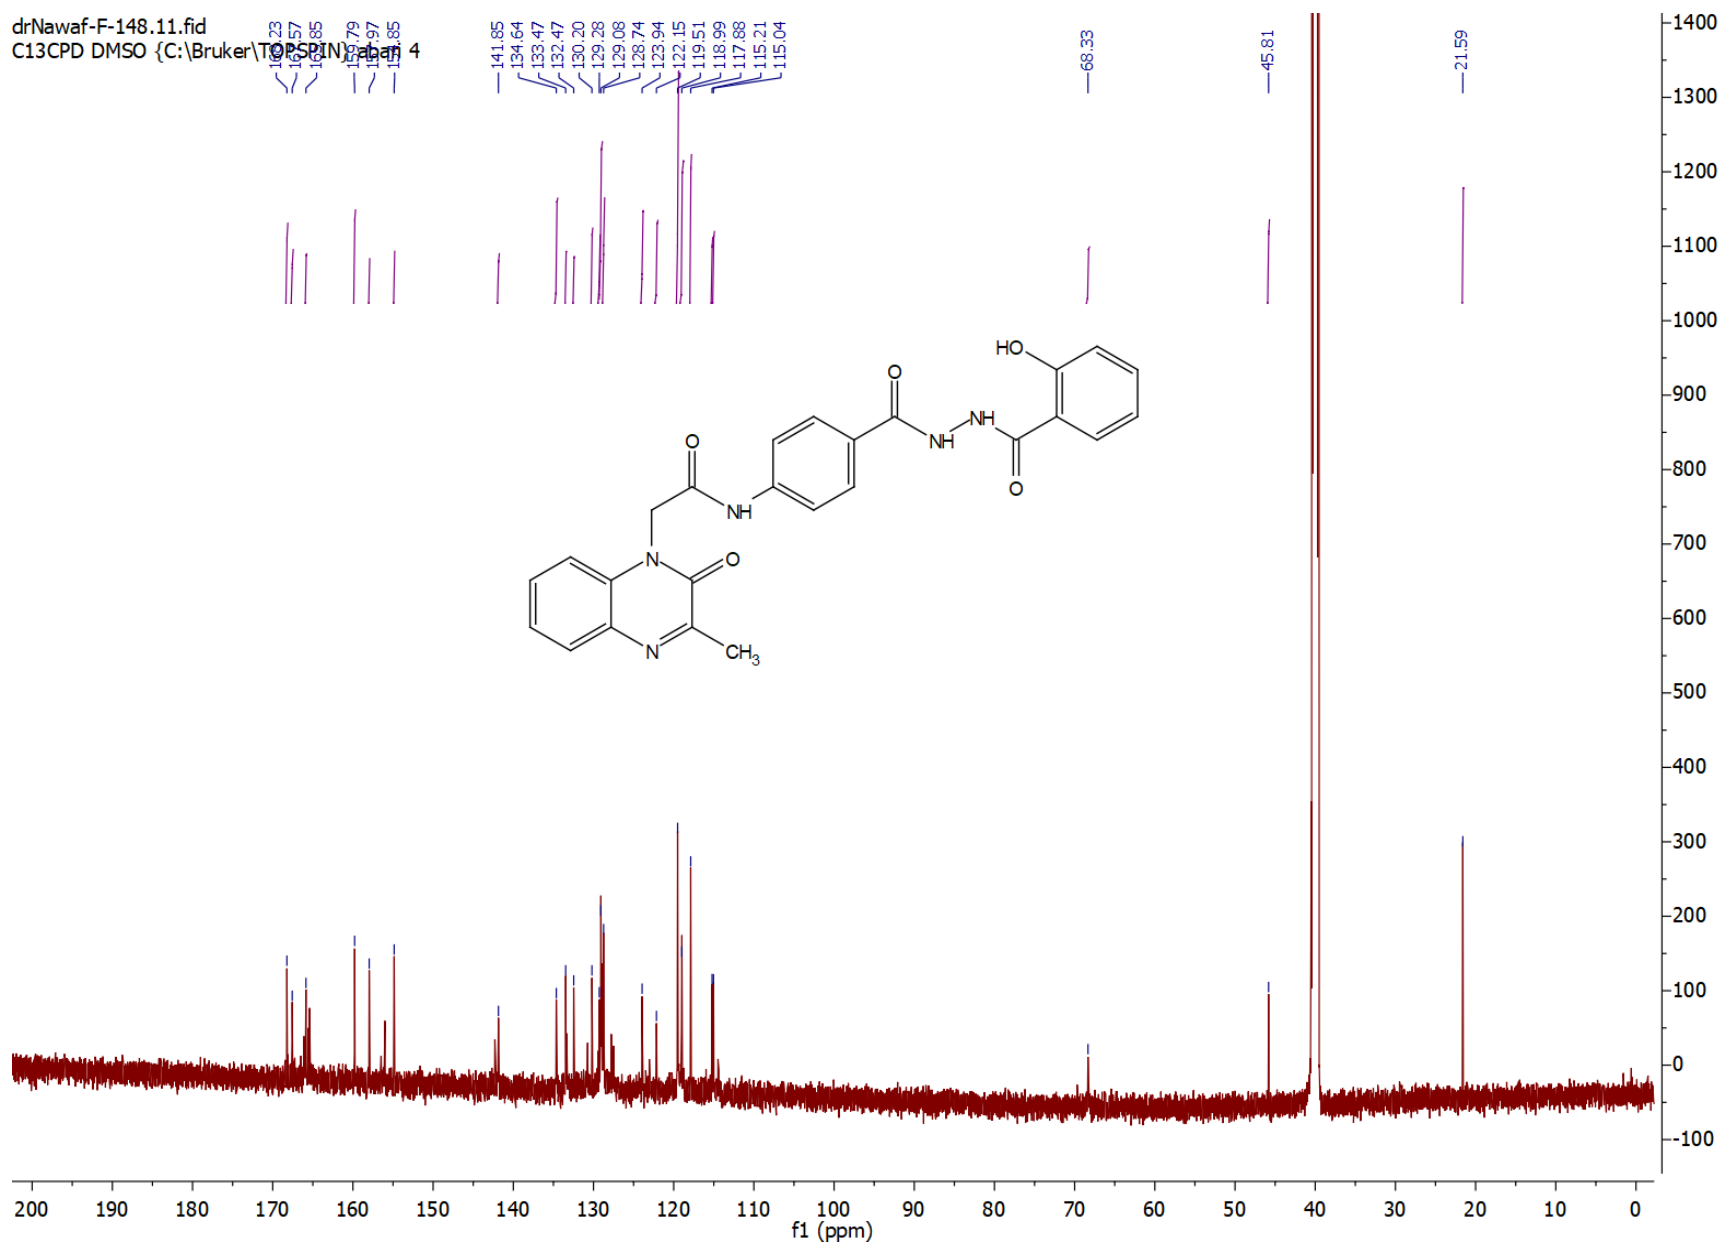



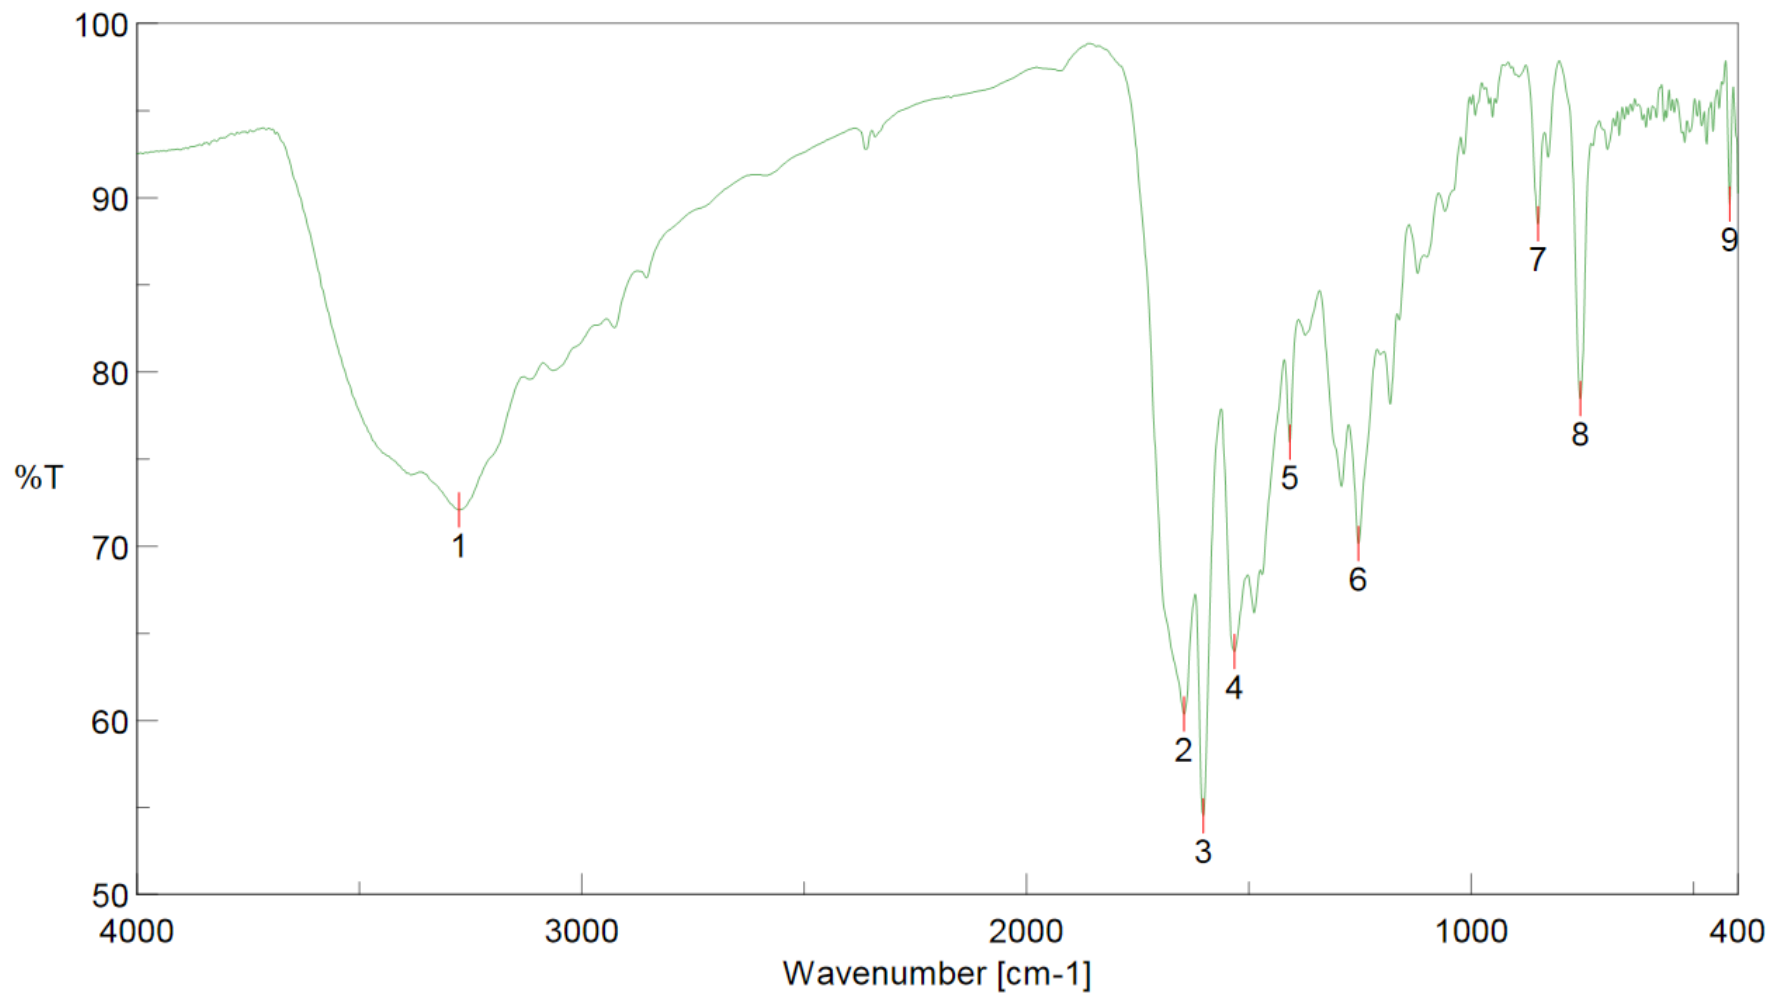

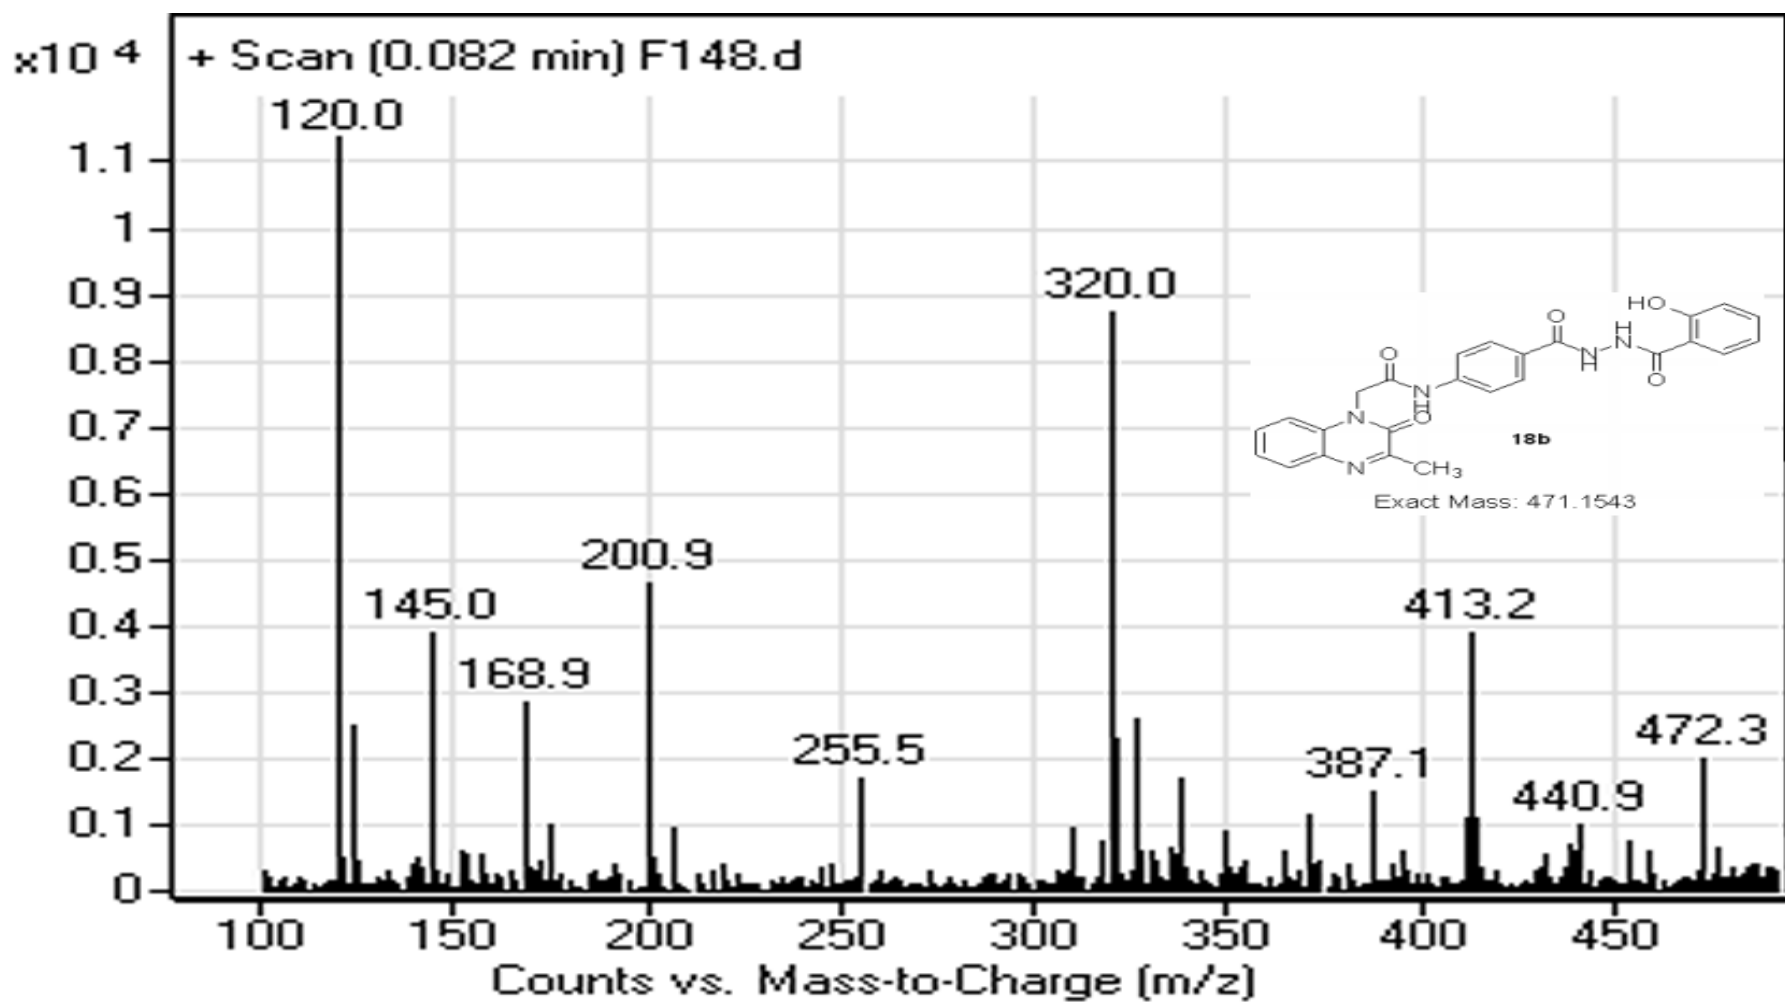

## NMR spectra

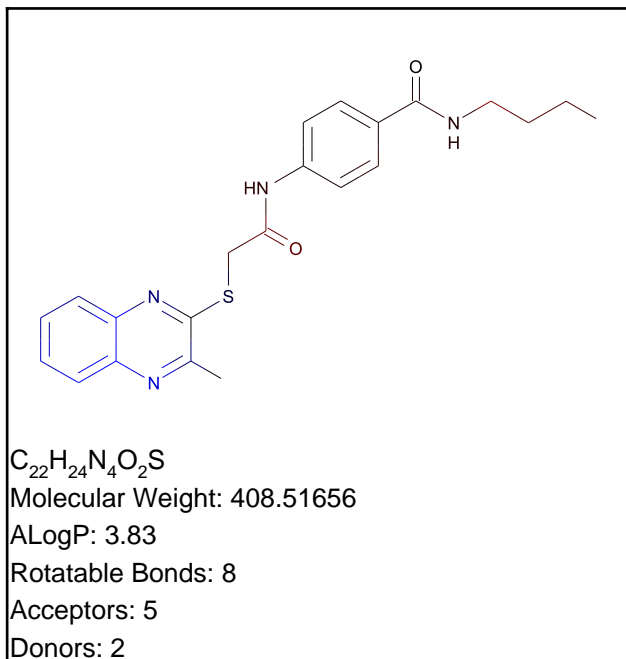

### Model Prediction

Prediction: Non-Degradable

Probability: 0.318

Enrichment: 0.729

Bayesian Score: -3.803

Mahalanobis Distance: 15.266

Mahalanobis Distance p-value: 7.74e-013

Prediction: Positive if the Bayesian score is above the estimated best cutoff value from minimizing the false positive and false negative rate.

Probability: The estimated probability that the sample is in the positive category. This assumes that the Bayesian score follows a normal distribution and is different from the prediction using a cutoff.

Enrichment: An estimate of enrichment, that is, the increased likelihood (versus random) of this sample being in the category.

Bayesian Score: The standard Laplacian-modified Bayesian score.

Mahalanobis Distance: The Mahalanobis distance (MD) is the distance to the center of the training data. The larger the MD, the less trustworthy the prediction.

Mahalanobis Distance p-value: The p-value gives the fraction of training data with an MD greater than or equal to the one for the given sample, assuming normally distributed data. The smaller the p-value, the less trustworthy the prediction. For highly non-normal X properties (e.g., fingerprints), the MD p-value is wildly inaccurate.

### Structural Similar Compounds

| Name               | Benzenesulfonamide, 3-nitro-N-phenyl-4-(phenylamino)-                               | 9,10-Anthracenedione, 1-amino-2-(4-bromophenoxy)-4-hydroxy-                         | Bicyclo_2.2.1_hept-5-ene-2,3-dicarboxylic_acid, 1,4,5,6,7,7-hexachloro-             |
|--------------------|-------------------------------------------------------------------------------------|-------------------------------------------------------------------------------------|-------------------------------------------------------------------------------------|
| Structure          | 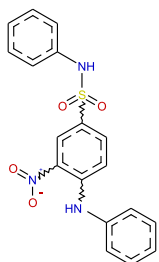 |  |  |
| Actual Endpoint    | Non-Degradable                                                                      | Non-Degradable                                                                      | Non-Degradable                                                                      |
| Predicted Endpoint | Non-Degradable                                                                      | Non-Degradable                                                                      | Non-Degradable                                                                      |
| Distance           | 0.606                                                                               | 0.667                                                                               | 0.728                                                                               |
| Reference          | Environmental Toxicology & Chemistry 18(9), 1763-1768, 1999.                        | Environmental Toxicology & Chemistry 18(9), 1763-1768, 1999.                        | Environmental Toxicology & Chemistry 18(9), 1763-1768, 1999.                        |

### Model Applicability

Unknown features are fingerprint features in the query molecule, but not found in the training set.

- OPS PC18 out of range. Value: 4.61. Training min, max, SD, explained variance: -3.5239, 4.5287, 1.221, 0.0171.

### Feature Contribution

#### Top features for positive contribution

| Fingerprint | Bit/Smiles  | Feature Structure                                                                                | Score | Degradable in training set |
|-------------|-------------|--------------------------------------------------------------------------------------------------|-------|----------------------------|
| SCFP_12     | -1577600103 | 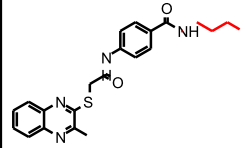<br>[*]CCCC | 0.631 | 113 out of 147             |

|                                               |                   |                                                                                                                                                     |              |                                   |
|-----------------------------------------------|-------------------|-----------------------------------------------------------------------------------------------------------------------------------------------------|--------------|-----------------------------------|
| SCFP_12                                       | 1256995004        | 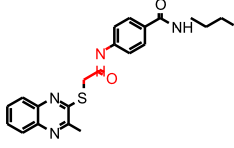<br><chem>[*]CC(=O)N[*]</chem>                                   | 0.540        | 23 out of 32                      |
| SCFP_12                                       | -1272798659       | <br><chem>[*]CCC[*]</chem>                                       | 0.518        | 160 out of 234                    |
| <b>Top Features for negative contribution</b> |                   |                                                                                                                                                     |              |                                   |
| <b>Fingerprint</b>                            | <b>Bit/Smiles</b> | <b>Feature Structure</b>                                                                                                                            | <b>Score</b> | <b>Degradable in training set</b> |
| SCFP_12                                       | 112554633         | <br><chem>[*]:[cH]:[c](:n:[*]):<br/>[c](:[*]):[*]</chem>         | -1.077       | 1 out of 12                       |
| SCFP_12                                       | -1381862798       | <br><chem>[*]:n:[c]1:[cH]:[cH]:<br/>[cH]:[*]:[c]:1:[*]</chem>  | -1.077       | 1 out of 12                       |
| SCFP_12                                       | 1655199790        | <br><chem>[*]:n:[c]1:[cH]:[cH]:<br/>[cH]:[cH]:[c]:1:[*]</chem> | -1.005       | 1 out of 11                       |

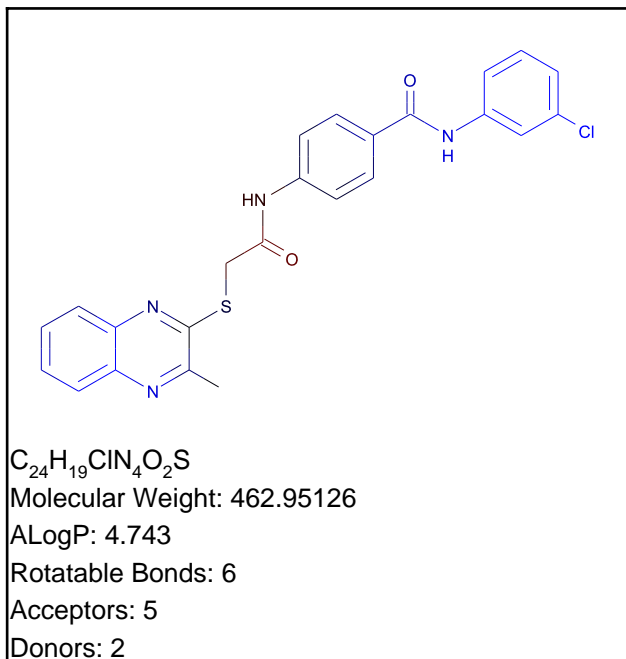

### Model Prediction

Prediction: Non-Degradable

Probability: 0.029

Enrichment: 0.067

Bayesian Score: -18.792

Mahalanobis Distance: 15.602

Mahalanobis Distance p-value: 5.79e-014

Prediction: Positive if the Bayesian score is above the estimated best cutoff value from minimizing the false positive and false negative rate.

Probability: The estimated probability that the sample is in the positive category. This assumes that the Bayesian score follows a normal distribution and is different from the prediction using a cutoff.

Enrichment: An estimate of enrichment, that is, the increased likelihood (versus random) of this sample being in the category.

Bayesian Score: The standard Laplacian-modified Bayesian score.

Mahalanobis Distance: The Mahalanobis distance (MD) is the distance to the center of the training data. The larger the MD, the less trustworthy the prediction.

Mahalanobis Distance p-value: The p-value gives the fraction of training data with an MD greater than or equal to the one for the given sample, assuming normally distributed data. The smaller the p-value, the less trustworthy the prediction. For highly non-normal X properties (e.g., fingerprints), the MD p-value is wildly inaccurate.

### Structural Similar Compounds

| Name               | 9,10-Anthracenedione,_1-amino-2-(4-bromophenoxy)-4-hydroxy-  | Benzenesulfonamide,_3-nitro-N-phenyl-4-(phenylamino)-        | Mitin_FF                                                     |
|--------------------|--------------------------------------------------------------|--------------------------------------------------------------|--------------------------------------------------------------|
| Structure          |                                                              |                                                              |                                                              |
| Actual Endpoint    | Non-Degradable                                               | Non-Degradable                                               | Non-Degradable                                               |
| Predicted Endpoint | Non-Degradable                                               | Non-Degradable                                               | Non-Degradable                                               |
| Distance           | 0.641                                                        | 0.681                                                        | 0.733                                                        |
| Reference          | Environmental Toxicology & Chemistry 18(9), 1763-1768, 1999. | Environmental Toxicology & Chemistry 18(9), 1763-1768, 1999. | Environmental Toxicology & Chemistry 18(9), 1763-1768, 1999. |

### Model Applicability

Unknown features are fingerprint features in the query molecule, but not found in the training set.

- All properties and OPS components are within expected ranges.

### Feature Contribution

#### Top features for positive contribution

| Fingerprint | Bit/Smiles | Feature Structure              | Score | Degradable in training set |
|-------------|------------|--------------------------------|-------|----------------------------|
| SCFP_12     | 1256995004 | <br><chem>[*]CC(=O)N[*]</chem> | 0.540 | 23 out of 32               |

|                                               |                   |                                                                                                                                         |              |                                   |
|-----------------------------------------------|-------------------|-----------------------------------------------------------------------------------------------------------------------------------------|--------------|-----------------------------------|
| SCFP_12                                       | 1311071855        | 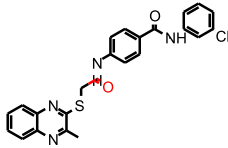<br><chem>[*]C(=O)[*]</chem>                         | 0.461        | 173 out of 268                    |
| SCFP_12                                       | 2097618059        | <br><chem>[*]CC(=O)N(c)[c]([cH]:[ *])[cH]:[*]</chem> | 0.446        | 5 out of 7                        |
| <b>Top Features for negative contribution</b> |                   |                                                                                                                                         |              |                                   |
| <b>Fingerprint</b>                            | <b>Bit/Smiles</b> | <b>Feature Structure</b>                                                                                                                | <b>Score</b> | <b>Degradable in training set</b> |
| SCFP_12                                       | -1378360678       | <br><chem>Cl[c]1:[cH]:[*]:[cH]:[cH]:[cH]:1</chem>    | -1.878       | 3 out of 62                       |
| SCFP_12                                       | -52074512         | <br><chem>[*]:[c](:[*])Cl</chem>                    | -1.865       | 5 out of 93                       |
| SCFP_12                                       | -601571304        | <br><chem>[*]:[cH]:[c](Cl):[cH]:[*]</chem>         | -1.844       | 5 out of 91                       |

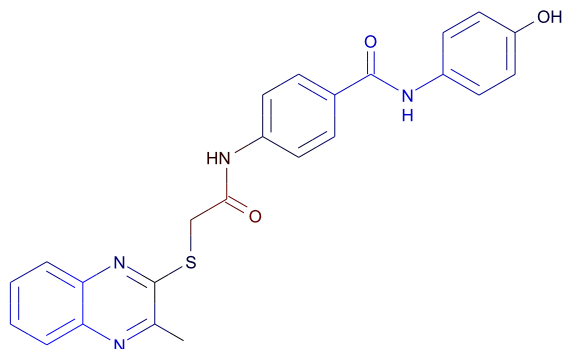

$C_{24}H_{20}N_4O_3S$

Molecular Weight: 444.5056

ALogP: 3.836

Rotatable Bonds: 6

Acceptors: 6

Donors: 3

## Model Prediction

Prediction: Non-Degradable

Probability: 0.093

Enrichment: 0.213

Bayesian Score: -12.054

Mahalanobis Distance: 15.808

Mahalanobis Distance p-value: 1.13e-014

Prediction: Positive if the Bayesian score is above the estimated best cutoff value from minimizing the false positive and false negative rate.

Probability: The estimated probability that the sample is in the positive category. This assumes that the Bayesian score follows a normal distribution and is different from the prediction using a cutoff.

Enrichment: An estimate of enrichment, that is, the increased likelihood (versus random) of this sample being in the category.

Bayesian Score: The standard Laplacian-modified Bayesian score.

Mahalanobis Distance: The Mahalanobis distance (MD) is the distance to the center of the training data. The larger the MD, the less trustworthy the prediction.

Mahalanobis Distance p-value: The p-value gives the fraction of training data with an MD greater than or equal to the one for the given sample, assuming normally distributed data. The smaller the p-value, the less trustworthy the prediction. For highly non-normal X properties (e.g., fingerprints), the MD p-value is wildly inaccurate.

## Structural Similar Compounds

| Name               | 9,10-Anthracenedione, 1,8-dihydroxy-4-nitro-5-(phenylamino)- | Mitin_FF                                                     | Brilliant_Blue_6B                                            |
|--------------------|--------------------------------------------------------------|--------------------------------------------------------------|--------------------------------------------------------------|
| Structure          |                                                              |                                                              |                                                              |
| Actual Endpoint    | Non-Degradable                                               | Non-Degradable                                               | Non-Degradable                                               |
| Predicted Endpoint | Non-Degradable                                               | Non-Degradable                                               | Non-Degradable                                               |
| Distance           | 0.689                                                        | 0.707                                                        | 0.723                                                        |
| Reference          | Environmental Toxicology & Chemistry 18(9), 1763-1768, 1999. | Environmental Toxicology & Chemistry 18(9), 1763-1768, 1999. | Environmental Toxicology & Chemistry 18(9), 1763-1768, 1999. |

## Model Applicability

Unknown features are fingerprint features in the query molecule, but not found in the training set.

- OPS PC23 out of range. Value: 3.602. Training min, max, SD, explained variance: -3.0926, 3.437, 1.042, 0.0125.

## Feature Contribution

### Top features for positive contribution

| Fingerprint | Bit/Smiles | Feature Structure | Score | Degradable in training set |
|-------------|------------|-------------------|-------|----------------------------|
| SCFP_12     | 1256995004 | <br>[*]CC(=O)N[*] | 0.540 | 23 out of 32               |



| SCFP_12                                | 1311071855  | 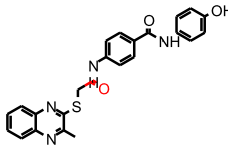<br>[*]C(=O)[*]                                | 0.461  | 173 out of 268             |
|----------------------------------------|-------------|-----------------------------------------------------------------------------------------------------------------------------------|--------|----------------------------|
| SCFP_12                                | 2097618059  | <br>[*]CC(=O)N[c]([cH]([*])[cH]:[*])           | 0.446  | 5 out of 7                 |
| Top Features for negative contribution |             |                                                                                                                                   |        |                            |
| Fingerprint                            | Bit/Smiles  | Feature Structure                                                                                                                 | Score  | Degradable in training set |
| SCFP_12                                | -1381862798 | <br>[*]:n:[c]1:[cH]:[cH]:[cH]:[*]:[c]:1:[*]    | -1.077 | 1 out of 12                |
| SCFP_12                                | 112554633   | <br>[*]:[cH]:[c]([:n:[*]):[c](:[*]):[*]       | -1.077 | 1 out of 12                |
| SCFP_12                                | 1655199790  | <br>[*]:n:[c]1:[cH]:[cH]:[cH]:[cH]:[c]:1:[*] | -1.005 | 1 out of 11                |

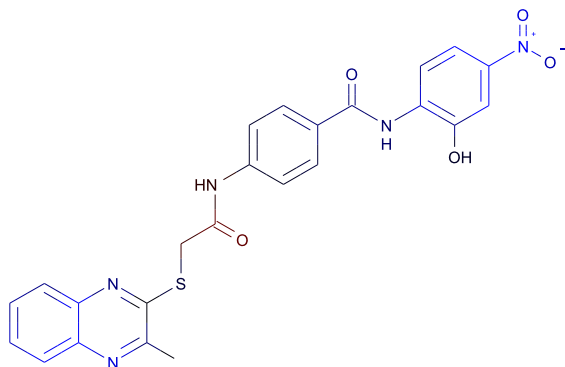

$C_{24}H_{19}N_5O_5S$

Molecular Weight: 489.50316

ALogP: 3.731

Rotatable Bonds: 7

Acceptors: 8

Donors: 3

## Model Prediction

Prediction: Non-Degradable

Probability: 0.022

Enrichment: 0.051

Bayesian Score: -20.302

Mahalanobis Distance: 21.366

Mahalanobis Distance p-value: 3.58e-038

Prediction: Positive if the Bayesian score is above the estimated best cutoff value from minimizing the false positive and false negative rate.

Probability: The estimated probability that the sample is in the positive category. This assumes that the Bayesian score follows a normal distribution and is different from the prediction using a cutoff.

Enrichment: An estimate of enrichment, that is, the increased likelihood (versus random) of this sample being in the category.

Bayesian Score: The standard Laplacian-modified Bayesian score.

Mahalanobis Distance: The Mahalanobis distance (MD) is the distance to the center of the training data. The larger the MD, the less trustworthy the prediction.

Mahalanobis Distance p-value: The p-value gives the fraction of training data with an MD greater than or equal to the one for the given sample, assuming normally distributed data. The smaller the p-value, the less trustworthy the prediction. For highly non-normal X properties (e.g., fingerprints), the MD p-value is wildly inaccurate.

## Structural Similar Compounds

| Name               | Brilliant_Blue_6B                                            | 9,10-Anthracenedione, 1,8-dihydroxy-4-nitro-5-(phenylamino)- | Methylpyridine                                               |
|--------------------|--------------------------------------------------------------|--------------------------------------------------------------|--------------------------------------------------------------|
| Structure          |                                                              |                                                              |                                                              |
| Actual Endpoint    | Non-Degradable                                               | Non-Degradable                                               | Degradable                                                   |
| Predicted Endpoint | Non-Degradable                                               | Non-Degradable                                               | Degradable                                                   |
| Distance           | 0.621                                                        | 0.722                                                        | 0.838                                                        |
| Reference          | Environmental Toxicology & Chemistry 18(9), 1763-1768, 1999. | Environmental Toxicology & Chemistry 18(9), 1763-1768, 1999. | Environmental Toxicology & Chemistry 18(9), 1763-1768, 1999. |

## Model Applicability

Unknown features are fingerprint features in the query molecule, but not found in the training set.

- OPS PC18 out of range. Value: 4.9115. Training min, max, SD, explained variance: -3.5239, 4.5287, 1.221, 0.0171.

## Feature Contribution

### Top features for positive contribution

| Fingerprint | Bit/Smiles | Feature Structure | Score | Degradable in training set |
|-------------|------------|-------------------|-------|----------------------------|
| SCFP_12     | 1256995004 | <br>[*]CC(=O)N[*] | 0.540 | 23 out of 32               |

|                                               |                   |                                                                                                                                          |              |                                   |
|-----------------------------------------------|-------------------|------------------------------------------------------------------------------------------------------------------------------------------|--------------|-----------------------------------|
| SCFP_12                                       | 1311071855        | 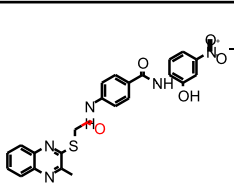<br><chem>[*]C(=O)[*]</chem>                           | 0.461        | 173 out of 268                    |
| SCFP_12                                       | 2097618059        | <br><chem>[*]CC(=O)N(c)([cH]([*])):[cH]:[*]</chem>    | 0.446        | 5 out of 7                        |
| <b>Top Features for negative contribution</b> |                   |                                                                                                                                          |              |                                   |
| <b>Fingerprint</b>                            | <b>Bit/Smiles</b> | <b>Feature Structure</b>                                                                                                                 | <b>Score</b> | <b>Degradable in training set</b> |
| SCFP_12                                       | 1311339974        | <br><chem>[*][N+](=O)[*]</chem>                       | -1.780       | 3 out of 56                       |
| SCFP_12                                       | 1334669481        | <br><chem>[*][N+](=[*])[c]([cH]:[*]):[cH]:[*]</chem> | -1.631       | 10 out of 136                     |
| SCFP_12                                       | 10                | <br><chem>[*][N+](=[*])[*]</chem>                   | -1.607       | 11 out of 145                     |

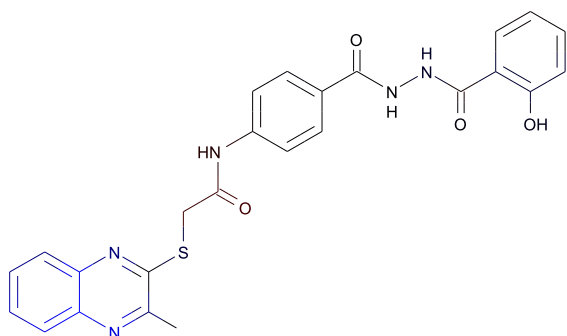

$C_{25}H_{21}N_5O_4S$

Molecular Weight: 487.53034

ALogP: 3.093

Rotatable Bonds: 7

Acceptors: 7

Donors: 4

## Model Prediction

Prediction: Non-Degradable

Probability: 0.172

Enrichment: 0.394

Bayesian Score: -8.173

Mahalanobis Distance: 15.835

Mahalanobis Distance p-value: 9.05e-015

Prediction: Positive if the Bayesian score is above the estimated best cutoff value from minimizing the false positive and false negative rate.

Probability: The estimated probability that the sample is in the positive category. This assumes that the Bayesian score follows a normal distribution and is different from the prediction using a cutoff.

Enrichment: An estimate of enrichment, that is, the increased likelihood (versus random) of this sample being in the category.

Bayesian Score: The standard Laplacian-modified Bayesian score.

Mahalanobis Distance: The Mahalanobis distance (MD) is the distance to the center of the training data. The larger the MD, the less trustworthy the prediction.

Mahalanobis Distance p-value: The p-value gives the fraction of training data with an MD greater than or equal to the one for the given sample, assuming normally distributed data. The smaller the p-value, the less trustworthy the prediction. For highly non-normal X properties (e.g., fingerprints), the MD p-value is wildly inaccurate.

## Structural Similar Compounds

| Name               | Brilliant_Blue_6B                                            | 9,10-Anthracenedione, 1,8-dihydroxy-4-nitro-5-(phenylamino)- | Benzenesulfonic acid, 4,4'-oxybis-, dihydrazide              |
|--------------------|--------------------------------------------------------------|--------------------------------------------------------------|--------------------------------------------------------------|
| Structure          |                                                              |                                                              |                                                              |
| Actual Endpoint    | Non-Degradable                                               | Non-Degradable                                               | Non-Degradable                                               |
| Predicted Endpoint | Non-Degradable                                               | Non-Degradable                                               | Non-Degradable                                               |
| Distance           | 0.782                                                        | 0.807                                                        | 0.880                                                        |
| Reference          | Environmental Toxicology & Chemistry 18(9), 1763-1768, 1999. | Environmental Toxicology & Chemistry 18(9), 1763-1768, 1999. | Environmental Toxicology & Chemistry 18(9), 1763-1768, 1999. |

## Model Applicability

Unknown features are fingerprint features in the query molecule, but not found in the training set.

- All properties and OPS components are within expected ranges.

## Feature Contribution

### Top features for positive contribution

| Fingerprint | Bit/Smiles | Feature Structure | Score | Degradable in training set |
|-------------|------------|-------------------|-------|----------------------------|
| SCFP_12     | 1256995004 | <br>[*]CC(=O)N[*] | 0.540 | 23 out of 32               |

|                                               |                   |                                                                                                                                                |              |                                   |
|-----------------------------------------------|-------------------|------------------------------------------------------------------------------------------------------------------------------------------------|--------------|-----------------------------------|
| SCFP_12                                       | 1311071855        | 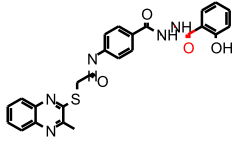<br><chem>[*]C(=O)[*]</chem>                                | 0.461        | 173 out of 268                    |
| SCFP_12                                       | 2097618059        | <br><chem>[*]CC(=O)N(c)[:-[cH]:[*]]</chem>                  | 0.446        | 5 out of 7                        |
| <b>Top Features for negative contribution</b> |                   |                                                                                                                                                |              |                                   |
| <b>Fingerprint</b>                            | <b>Bit/Smiles</b> | <b>Feature Structure</b>                                                                                                                       | <b>Score</b> | <b>Degradable in training set</b> |
| SCFP_12                                       | 112554633         | <br><chem>[*]:[cH]:[c](:n:[*]):[c](:[*]):[*]</chem>         | -1.077       | 1 out of 12                       |
| SCFP_12                                       | -1381862798       | <br><chem>[*]:n:[c]1:[cH]:[cH]:[cH]:[*]:[c]:1:[*]</chem>   | -1.077       | 1 out of 12                       |
| SCFP_12                                       | 1655199790        | <br><chem>[*]:n:[c]1:[cH]:[cH]:[cH]:[cH]:[c]:1:[*]</chem> | -1.005       | 1 out of 11                       |

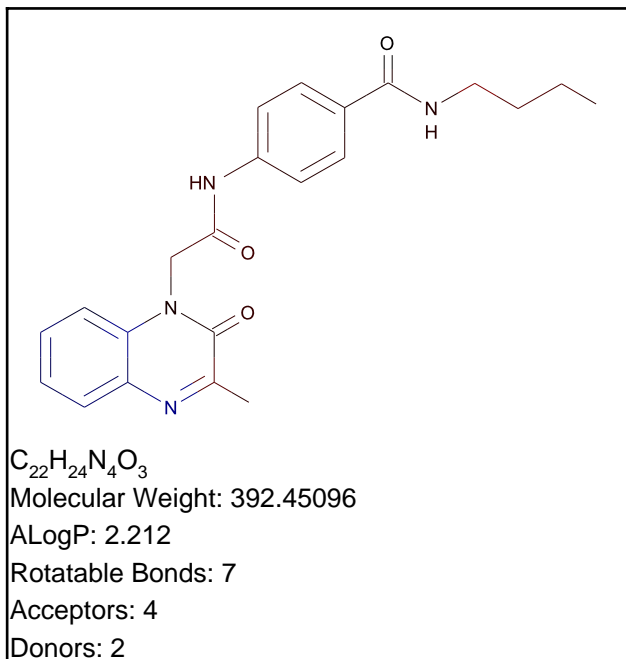

### Model Prediction

Prediction: Degradable

Probability: 0.613

Enrichment: 1.406

Bayesian Score: 2.598

Mahalanobis Distance: 13.176

Mahalanobis Distance p-value: 8.54e-007

Prediction: Positive if the Bayesian score is above the estimated best cutoff value from minimizing the false positive and false negative rate.

Probability: The estimated probability that the sample is in the positive category. This assumes that the Bayesian score follows a normal distribution and is different from the prediction using a cutoff.

Enrichment: An estimate of enrichment, that is, the increased likelihood (versus random) of this sample being in the category.

Bayesian Score: The standard Laplacian-modified Bayesian score.

Mahalanobis Distance: The Mahalanobis distance (MD) is the distance to the center of the training data. The larger the MD, the less trustworthy the prediction.

Mahalanobis Distance p-value: The p-value gives the fraction of training data with an MD greater than or equal to the one for the given sample, assuming normally distributed data. The smaller the p-value, the less trustworthy the prediction. For highly non-normal X properties (e.g., fingerprints), the MD p-value is wildly inaccurate.

### Structural Similar Compounds

| Name               | Bicyclo_2.2.1_hept-5-ene-2,3-dicarboxylic_acid,_1,4,5,6,7,7-hexachloro- | Benzenesulfonamide,_3-nitro-N-phenyl-4-(phenylamino)-        | 9,10-Anthracenedione,_1-amino-2-(4-bromophenoxy)-4-hydroxy-  |
|--------------------|-------------------------------------------------------------------------|--------------------------------------------------------------|--------------------------------------------------------------|
| Structure          |                                                                         |                                                              |                                                              |
| Actual Endpoint    | Non-Degradable                                                          | Non-Degradable                                               | Non-Degradable                                               |
| Predicted Endpoint | Non-Degradable                                                          | Non-Degradable                                               | Non-Degradable                                               |
| Distance           | 0.647                                                                   | 0.689                                                        | 0.723                                                        |
| Reference          | Environmental Toxicology & Chemistry 18(9), 1763-1768, 1999.            | Environmental Toxicology & Chemistry 18(9), 1763-1768, 1999. | Environmental Toxicology & Chemistry 18(9), 1763-1768, 1999. |

### Model Applicability

Unknown features are fingerprint features in the query molecule, but not found in the training set.

- All properties and OPS components are within expected ranges.

### Feature Contribution

#### Top features for positive contribution

| Fingerprint | Bit/Smiles | Feature Structure            | Score | Degradable in training set |
|-------------|------------|------------------------------|-------|----------------------------|
| SCFP_12     | 136627117  | <br><chem>[*]C(=[*])C</chem> | 0.662 | 56 out of 70               |

| SCFP_12                                       | -1577600103 | 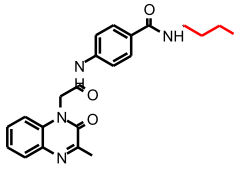<br>[*]CCCC                                     | 0.631  | 113 out of 147             |
|-----------------------------------------------|-------------|------------------------------------------------------------------------------------------------------------------------------------|--------|----------------------------|
| SCFP_12                                       | 1256995004  | <br>[*]CC(=O)N[*]                               | 0.540  | 23 out of 32               |
| <b>Top Features for negative contribution</b> |             |                                                                                                                                    |        |                            |
| Fingerprint                                   | Bit/Smiles  | Feature Structure                                                                                                                  | Score  | Degradable in training set |
| SCFP_12                                       | 6           | <br>[*]N=[*]                                    | -1.018 | 2 out of 18                |
| SCFP_12                                       | -1377141613 | <br>[*][c]1:[*]:[cH]:[cH]<br>:[cH]:[c]:1N=[*] | -0.964 | 0 out of 4                 |
| SCFP_12                                       | 1851000357  | <br>[*][c](:[*]):[c](:[cH]<br>:[*])N=[*]      | -0.964 | 0 out of 4                 |

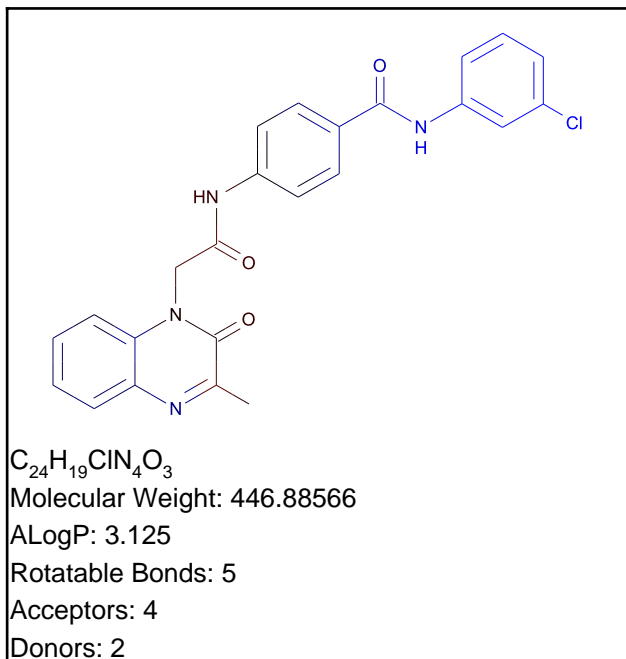

### Model Prediction

Prediction: Non-Degradable

Probability: 0.082

Enrichment: 0.187

Bayesian Score: -12.860

Mahalanobis Distance: 12.676

Mahalanobis Distance p-value: 1.27e-005

Prediction: Positive if the Bayesian score is above the estimated best cutoff value from minimizing the false positive and false negative rate.

Probability: The estimated probability that the sample is in the positive category. This assumes that the Bayesian score follows a normal distribution and is different from the prediction using a cutoff.

Enrichment: An estimate of enrichment, that is, the increased likelihood (versus random) of this sample being in the category.

Bayesian Score: The standard Laplacian-modified Bayesian score.

Mahalanobis Distance: The Mahalanobis distance (MD) is the distance to the center of the training data. The larger the MD, the less trustworthy the prediction.

Mahalanobis Distance p-value: The p-value gives the fraction of training data with an MD greater than or equal to the one for the given sample, assuming normally distributed data. The smaller the p-value, the less trustworthy the prediction. For highly non-normal X properties (e.g., fingerprints), the MD p-value is wildly inaccurate.

### Structural Similar Compounds

| Name               | Bicyclo_2.2.1_hept-5-ene-2,3-dicarboxylic_acid,_1,4,5,6,7,7-hexachloro- | 9,10-Anthracenedione,_1-amino-2-(4-bromophenoxy)-4-hydroxy-  | Benzenesulfonamide,_3-nitro-N-phenyl-4-(phenylamino)-        |
|--------------------|-------------------------------------------------------------------------|--------------------------------------------------------------|--------------------------------------------------------------|
| Structure          |                                                                         |                                                              |                                                              |
| Actual Endpoint    | Non-Degradable                                                          | Non-Degradable                                               | Non-Degradable                                               |
| Predicted Endpoint | Non-Degradable                                                          | Non-Degradable                                               | Non-Degradable                                               |
| Distance           | 0.633                                                                   | 0.669                                                        | 0.711                                                        |
| Reference          | Environmental Toxicology & Chemistry 18(9), 1763-1768, 1999.            | Environmental Toxicology & Chemistry 18(9), 1763-1768, 1999. | Environmental Toxicology & Chemistry 18(9), 1763-1768, 1999. |

### Model Applicability

Unknown features are fingerprint features in the query molecule, but not found in the training set.

- All properties and OPS components are within expected ranges.

### Feature Contribution

#### Top features for positive contribution

| Fingerprint | Bit/Smiles | Feature Structure                                                                                    | Score | Degradable in training set |
|-------------|------------|------------------------------------------------------------------------------------------------------|-------|----------------------------|
| SCFP_12     | 136627117  | 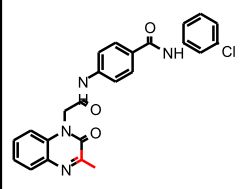<br>[*]C(=[*])C | 0.662 | 56 out of 70               |



|                                               |                   |                                                                                                                                 |              |                                   |
|-----------------------------------------------|-------------------|---------------------------------------------------------------------------------------------------------------------------------|--------------|-----------------------------------|
| SCFP_12                                       | 1256995004        | 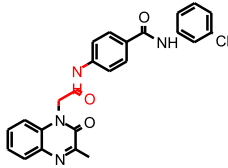<br><chem>[*]CC(=O)N[*]</chem>               | 0.540        | 23 out of 32                      |
| SCFP_12                                       | -587539325        | <br><chem>[*]N([*])CC(=[*])[*]</chem>        | 0.504        | 2 out of 2                        |
| <b>Top Features for negative contribution</b> |                   |                                                                                                                                 |              |                                   |
| <b>Fingerprint</b>                            | <b>Bit/Smiles</b> | <b>Feature Structure</b>                                                                                                        | <b>Score</b> | <b>Degradable in training set</b> |
| SCFP_12                                       | -1378360678       | <br><chem>Cl[c]1:[cH]:[*]:[cH]:[cH]:1</chem> | -1.878       | 3 out of 62                       |
| SCFP_12                                       | -52074512         | <br><chem>[*]:[c](:[*])Cl</chem>            | -1.865       | 5 out of 93                       |
| SCFP_12                                       | -601571304        | <br><chem>[*]:[cH]:[c](Cl):[cH]:[*]</chem> | -1.844       | 5 out of 91                       |

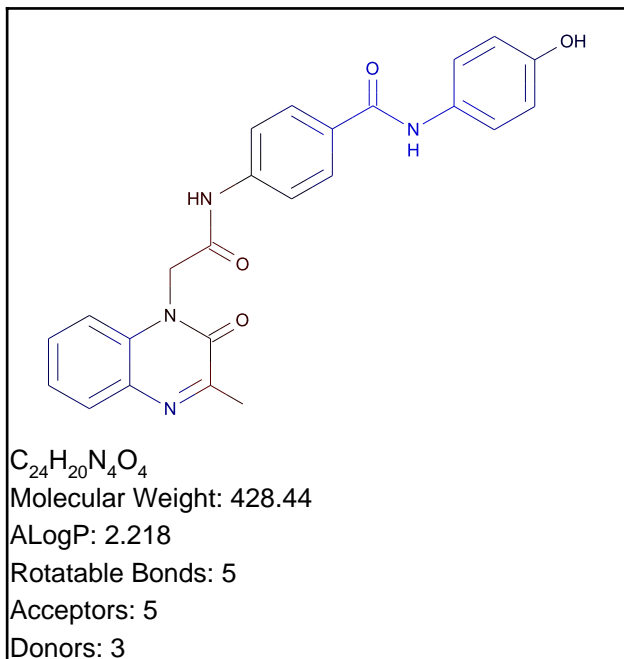

### Model Prediction

Prediction: Non-Degradable

Probability: 0.219

Enrichment: 0.503

Bayesian Score: -6.527

Mahalanobis Distance: 13.089

Mahalanobis Distance p-value: 1.39e-006

Prediction: Positive if the Bayesian score is above the estimated best cutoff value from minimizing the false positive and false negative rate.

Probability: The estimated probability that the sample is in the positive category. This assumes that the Bayesian score follows a normal distribution and is different from the prediction using a cutoff.

Enrichment: An estimate of enrichment, that is, the increased likelihood (versus random) of this sample being in the category.

Bayesian Score: The standard Laplacian-modified Bayesian score.

Mahalanobis Distance: The Mahalanobis distance (MD) is the distance to the center of the training data. The larger the MD, the less trustworthy the prediction.

Mahalanobis Distance p-value: The p-value gives the fraction of training data with an MD greater than or equal to the one for the given sample, assuming normally distributed data. The smaller the p-value, the less trustworthy the prediction. For highly non-normal X properties (e.g., fingerprints), the MD p-value is wildly inaccurate.

### Structural Similar Compounds

| Name               | Benzamide, N- 3-bis(2-hydroxyethyl)amino_phenyl_-            | 9,10-Anthracenedione, 1-amino-2-(4-bromophenoxy)-4-hydroxy-  | Benzenesulfonamide, 3-nitro-N-phenyl-4-(phenylamino)-        |
|--------------------|--------------------------------------------------------------|--------------------------------------------------------------|--------------------------------------------------------------|
| Structure          |                                                              |                                                              |                                                              |
| Actual Endpoint    | Non-Degradable                                               | Non-Degradable                                               | Non-Degradable                                               |
| Predicted Endpoint | Non-Degradable                                               | Non-Degradable                                               | Non-Degradable                                               |
| Distance           | 0.682                                                        | 0.756                                                        | 0.770                                                        |
| Reference          | Environmental Toxicology & Chemistry 18(9), 1763-1768, 1999. | Environmental Toxicology & Chemistry 18(9), 1763-1768, 1999. | Environmental Toxicology & Chemistry 18(9), 1763-1768, 1999. |

### Model Applicability

Unknown features are fingerprint features in the query molecule, but not found in the training set.

- OPS PC19 out of range. Value: 3.3958. Training min, max, SD, explained variance: -3.6394, 3.3101, 1.187, 0.0162.

### Feature Contribution

#### Top features for positive contribution

| Fingerprint | Bit/Smiles | Feature Structure | Score | Degradable in training set |
|-------------|------------|-------------------|-------|----------------------------|
| SCFP_12     | 136627117  | <br>[*]C(=[*])C   | 0.662 | 56 out of 70               |

| SCFP_12                                       | 1256995004  | 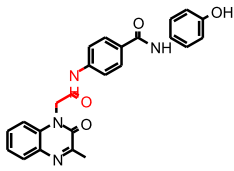<br><chem>[*]CC(=O)N[*]</chem>                          | 0.540  | 23 out of 32               |
|-----------------------------------------------|-------------|--------------------------------------------------------------------------------------------------------------------------------------------|--------|----------------------------|
| SCFP_12                                       | -587539325  | <br><chem>[*]N([*])CC(=[*])[*]</chem>                   | 0.504  | 2 out of 2                 |
| <b>Top Features for negative contribution</b> |             |                                                                                                                                            |        |                            |
| Fingerprint                                   | Bit/Smiles  | Feature Structure                                                                                                                          | Score  | Degradable in training set |
| SCFP_12                                       | 6           | <br><chem>[*]N=[*]</chem>                               | -1.018 | 2 out of 18                |
| SCFP_12                                       | -1377141613 | <br><chem>[*][c]1:[*]:[cH]:[cH]:[cH]:[c]:1N=[*]</chem> | -0.964 | 0 out of 4                 |
| SCFP_12                                       | 1851000357  | <br><chem>[*][c](:[*]):[c](:[cH]:[*])N=[*]</chem>     | -0.964 | 0 out of 4                 |

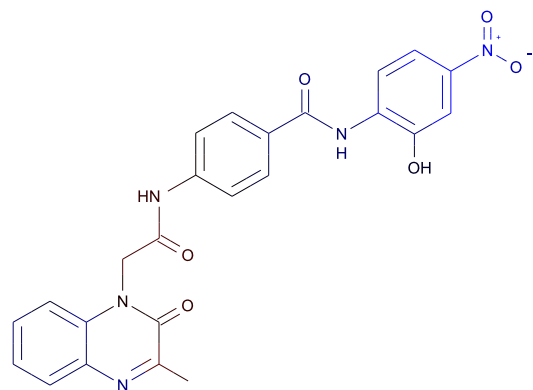
 $C_{24}H_{19}N_5O_6$ 

Molecular Weight: 473.43756

ALogP: 2.113

Rotatable Bonds: 6

Acceptors: 7

Donors: 3

### Model Prediction

Prediction: Non-Degradable

Probability: 0.058

Enrichment: 0.132

Bayesian Score: -14.947

Mahalanobis Distance: 19.514

Mahalanobis Distance p-value: 1.48e-029

Prediction: Positive if the Bayesian score is above the estimated best cutoff value from minimizing the false positive and false negative rate.

Probability: The estimated probability that the sample is in the positive category. This assumes that the Bayesian score follows a normal distribution and is different from the prediction using a cutoff.

Enrichment: An estimate of enrichment, that is, the increased likelihood (versus random) of this sample being in the category.

Bayesian Score: The standard Laplacian-modified Bayesian score.

Mahalanobis Distance: The Mahalanobis distance (MD) is the distance to the center of the training data. The larger the MD, the less trustworthy the prediction.

Mahalanobis Distance p-value: The p-value gives the fraction of training data with an MD greater than or equal to the one for the given sample, assuming normally distributed data. The smaller the p-value, the less trustworthy the prediction. For highly non-normal X properties (e.g., fingerprints), the MD p-value is wildly inaccurate.

### Structural Similar Compounds

| Name               | Brilliant_Blue_6B                                            | 9,10-Anthracenedione, 1,8-dihydroxy-4-nitro-5-(phenylamino)- | Mitin_FF                                                     |
|--------------------|--------------------------------------------------------------|--------------------------------------------------------------|--------------------------------------------------------------|
| Structure          |                                                              |                                                              |                                                              |
| Actual Endpoint    | Non-Degradable                                               | Non-Degradable                                               | Non-Degradable                                               |
| Predicted Endpoint | Non-Degradable                                               | Non-Degradable                                               | Non-Degradable                                               |
| Distance           | 0.679                                                        | 0.689                                                        | 0.853                                                        |
| Reference          | Environmental Toxicology & Chemistry 18(9), 1763-1768, 1999. | Environmental Toxicology & Chemistry 18(9), 1763-1768, 1999. | Environmental Toxicology & Chemistry 18(9), 1763-1768, 1999. |

### Model Applicability

Unknown features are fingerprint features in the query molecule, but not found in the training set.

- All properties and OPS components are within expected ranges.

### Feature Contribution

#### Top features for positive contribution

| Fingerprint | Bit/Smiles | Feature Structure | Score | Degradable in training set |
|-------------|------------|-------------------|-------|----------------------------|
| SCFP_12     | 136627117  | <br>[*]C(=[*])C   | 0.662 | 56 out of 70               |

|                                               |                   |                                                                                                                                           |              |                                   |
|-----------------------------------------------|-------------------|-------------------------------------------------------------------------------------------------------------------------------------------|--------------|-----------------------------------|
| SCFP_12                                       | 1256995004        | 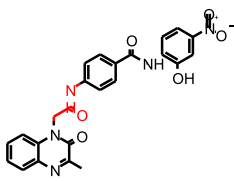<br><chem>[*]CC(=O)N[*]</chem>                         | 0.540        | 23 out of 32                      |
| SCFP_12                                       | -587539325        | <br><chem>[*]N[*]CC(=[*])[*]</chem>                    | 0.504        | 2 out of 2                        |
| <b>Top Features for negative contribution</b> |                   |                                                                                                                                           |              |                                   |
| <b>Fingerprint</b>                            | <b>Bit/Smiles</b> | <b>Feature Structure</b>                                                                                                                  | <b>Score</b> | <b>Degradable in training set</b> |
| SCFP_12                                       | 1311339974        | <br><chem>[*][N+](=O)[*]</chem>                        | -1.780       | 3 out of 56                       |
| SCFP_12                                       | 1334669481        | <br><chem>[*][N+](=[*])[c]([cH] ):[*]:[cH]:[*]</chem> | -1.631       | 10 out of 136                     |
| SCFP_12                                       | 10                | <br><chem>[*][N+](=[*])[*]</chem>                    | -1.607       | 11 out of 145                     |

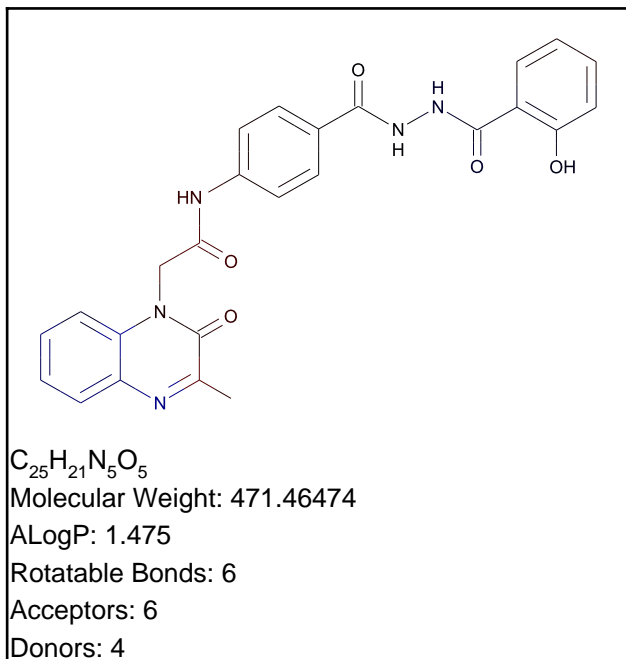

### Model Prediction

Prediction: Non-Degradable

Probability: 0.382

Enrichment: 0.875

Bayesian Score: -2.323

Mahalanobis Distance: 13.528

Mahalanobis Distance p-value: 1.09e-007

Prediction: Positive if the Bayesian score is above the estimated best cutoff value from minimizing the false positive and false negative rate.

Probability: The estimated probability that the sample is in the positive category. This assumes that the Bayesian score follows a normal distribution and is different from the prediction using a cutoff.

Enrichment: An estimate of enrichment, that is, the increased likelihood (versus random) of this sample being in the category.

Bayesian Score: The standard Laplacian-modified Bayesian score.

Mahalanobis Distance: The Mahalanobis distance (MD) is the distance to the center of the training data. The larger the MD, the less trustworthy the prediction.

Mahalanobis Distance p-value: The p-value gives the fraction of training data with an MD greater than or equal to the one for the given sample, assuming normally distributed data. The smaller the p-value, the less trustworthy the prediction. For highly non-normal X properties (e.g., fingerprints), the MD p-value is wildly inaccurate.

### Structural Similar Compounds

| Name               | 9,10-Anthracenedione, 1,8-dihydroxy-4-nitro-5-(phenylamino)- | Benzenesulfonic acid, 4,4'-oxybis-, dihydrazide              | Brilliant Blue 6B                                            |
|--------------------|--------------------------------------------------------------|--------------------------------------------------------------|--------------------------------------------------------------|
| Structure          |                                                              |                                                              |                                                              |
| Actual Endpoint    | Non-Degradable                                               | Non-Degradable                                               | Non-Degradable                                               |
| Predicted Endpoint | Non-Degradable                                               | Non-Degradable                                               | Non-Degradable                                               |
| Distance           | 0.842                                                        | 0.858                                                        | 0.866                                                        |
| Reference          | Environmental Toxicology & Chemistry 18(9), 1763-1768, 1999. | Environmental Toxicology & Chemistry 18(9), 1763-1768, 1999. | Environmental Toxicology & Chemistry 18(9), 1763-1768, 1999. |

### Model Applicability

Unknown features are fingerprint features in the query molecule, but not found in the training set.

- All properties and OPS components are within expected ranges.

### Feature Contribution

#### Top features for positive contribution

| Fingerprint | Bit/Smiles | Feature Structure            | Score | Degradable in training set |
|-------------|------------|------------------------------|-------|----------------------------|
| SCFP_12     | 136627117  | <br><chem>[*]C(=[*])C</chem> | 0.662 | 56 out of 70               |

|                                               |                   |                                                                                                                                                    |              |                                   |
|-----------------------------------------------|-------------------|----------------------------------------------------------------------------------------------------------------------------------------------------|--------------|-----------------------------------|
| SCFP_12                                       | 1256995004        | 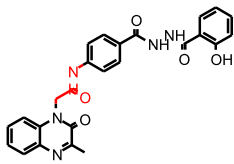<br><chem>[*]CC(=O)N[*]</chem>                                  | 0.540        | 23 out of 32                      |
| SCFP_12                                       | -587539325        | <br><chem>[*]N[*]CC(=O)[*]</chem>                               | 0.504        | 2 out of 2                        |
| <b>Top Features for negative contribution</b> |                   |                                                                                                                                                    |              |                                   |
| <b>Fingerprint</b>                            | <b>Bit/Smiles</b> | <b>Feature Structure</b>                                                                                                                           | <b>Score</b> | <b>Degradable in training set</b> |
| SCFP_12                                       | 6                 | <br><chem>[*]N=[*]</chem>                                       | -1.018       | 2 out of 18                       |
| SCFP_12                                       | 1851000357        | <br><chem>[*][c](:[*]):[c](:[cH] <br/> :)[*])N=[*]</chem>     | -0.964       | 0 out of 4                        |
| SCFP_12                                       | -1377141613       | <br><chem>[*][c]1:[*]:[cH]:[cH] <br/> :[cH]:[c]:1N=[*]</chem> | -0.964       | 0 out of 4                        |

# Sorafenib

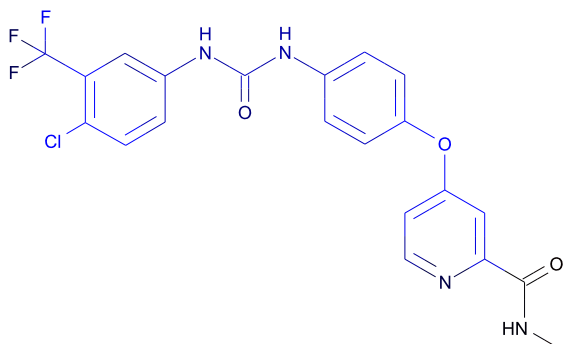

$C_{21}H_{16}ClF_3N_4O_3$

Molecular Weight: 464.82494

ALogP: 4.175

Rotatable Bonds: 6

Acceptors: 4

Donors: 3

## Model Prediction

Prediction: Non-Degradable

Probability: 0.013

Enrichment: 0.030

Bayesian Score: -23.288

Mahalanobis Distance: 15.358

Mahalanobis Distance p-value: 3.82e-013

Prediction: Positive if the Bayesian score is above the estimated best cutoff value from minimizing the false positive and false negative rate.

Probability: The estimated probability that the sample is in the positive category. This assumes that the Bayesian score follows a normal distribution and is different from the prediction using a cutoff.

Enrichment: An estimate of enrichment, that is, the increased likelihood (versus random) of this sample being in the category.

Bayesian Score: The standard Laplacian-modified Bayesian score.

Mahalanobis Distance: The Mahalanobis distance (MD) is the distance to the center of the training data. The larger the MD, the less trustworthy the prediction.

Mahalanobis Distance p-value: The p-value gives the fraction of training data with an MD greater than or equal to the one for the given sample, assuming normally distributed data. The smaller the p-value, the less trustworthy the prediction. For highly non-normal X properties (e.g., fingerprints), the MD p-value is wildly inaccurate.

# TOPKAT\_Aerobic\_Biodegradability

## Structural Similar Compounds

| Name               | Mitin_FF                                                     | 9,10-Anthracenedione,_1-amino-2-(4-bromophenoxy)-4-hydroxy-  | Benzamide,_N-3-bis(2-hydroxyethyl)amino_phenyl_-             |
|--------------------|--------------------------------------------------------------|--------------------------------------------------------------|--------------------------------------------------------------|
| Structure          |                                                              |                                                              |                                                              |
| Actual Endpoint    | Non-Degradable                                               | Non-Degradable                                               | Non-Degradable                                               |
| Predicted Endpoint | Non-Degradable                                               | Non-Degradable                                               | Non-Degradable                                               |
| Distance           | 0.634                                                        | 0.783                                                        | 0.789                                                        |
| Reference          | Environmental Toxicology & Chemistry 18(9), 1763-1768, 1999. | Environmental Toxicology & Chemistry 18(9), 1763-1768, 1999. | Environmental Toxicology & Chemistry 18(9), 1763-1768, 1999. |

## Model Applicability

Unknown features are fingerprint features in the query molecule, but not found in the training set.

- All properties and OPS components are within expected ranges.

## Feature Contribution

### Top features for positive contribution

| Fingerprint | Bit/Smiles | Feature Structure | Score | Degradable in training set |
|-------------|------------|-------------------|-------|----------------------------|
| SCFP_12     | 1311071855 | <br>[*]C(=O)[*]   | 0.461 | 173 out of 268             |



|                                               |                   |                                                                                                                                      |              |                                   |
|-----------------------------------------------|-------------------|--------------------------------------------------------------------------------------------------------------------------------------|--------------|-----------------------------------|
| SCFP_12                                       | 1                 | 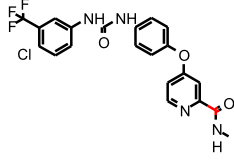<br><chem>[*]C(=[*])[*]</chem>                    | 0.359        | 194 out of 333                    |
| SCFP_12                                       | 12                | <br><chem>[*]O</chem>                             | 0.264        | 245 out of 463                    |
| <b>Top Features for negative contribution</b> |                   |                                                                                                                                      |              |                                   |
| <b>Fingerprint</b>                            | <b>Bit/Smiles</b> | <b>Feature Structure</b>                                                                                                             | <b>Score</b> | <b>Degradable in training set</b> |
| SCFP_12                                       | -1378360678       | <br><chem>Cl[c]1:[cH]:[*]:[cH]:[cH]:[cH]:1</chem> | -1.878       | 3 out of 62                       |
| SCFP_12                                       | -52074512         | <br><chem>[*]:[c](:[*])Cl</chem>                 | -1.865       | 5 out of 93                       |
| SCFP_12                                       | -601571304        | <br><chem>[*]:[cH]:[c](Cl):[cH]:[*]</chem>      | -1.844       | 5 out of 91                       |

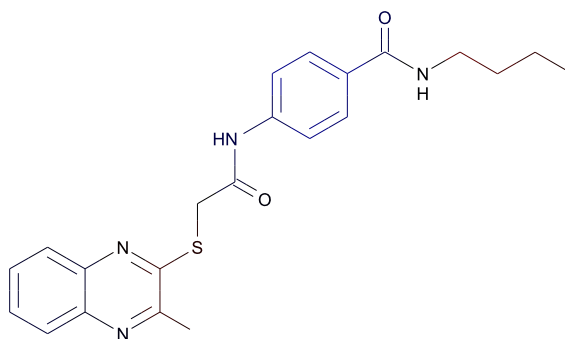

$C_{22}H_{24}N_4O_2S$

Molecular Weight: 408.51656

ALogP: 3.83

Rotatable Bonds: 8

Acceptors: 5

Donors: 2

## Model Prediction

Prediction: Mild

Probability: 0.781

Enrichment: 1.133

Bayesian Score: -1.662

Mahalanobis Distance: 9.107

Mahalanobis Distance p-value: 0.454

Prediction: Positive if the Bayesian score is above the estimated best cutoff value from minimizing the false positive and false negative rate.

Probability: The estimated probability that the sample is in the positive category. This assumes that the Bayesian score follows a normal distribution and is different from the prediction using a cutoff.

Enrichment: An estimate of enrichment, that is, the increased likelihood (versus random) of this sample being in the category.

Bayesian Score: The standard Laplacian-modified Bayesian score.

Mahalanobis Distance: The Mahalanobis distance (MD) is the distance to the center of the training data. The larger the MD, the less trustworthy the prediction.

Mahalanobis Distance p-value: The p-value gives the fraction of training data with an MD greater than or equal to the one for the given sample, assuming normally distributed data. The smaller the p-value, the less trustworthy the prediction. For highly non-normal X properties (e.g., fingerprints), the MD p-value is wildly inaccurate.

## Structural Similar Compounds

| Name               | ANTHRAQUINONE; 1-AMINO-4-HYDROXY-2-PHENOXY- | 1-AMINO-4-BENZOYLAMINO-ANTHRAQUINONE | 5-NORBORNENE-2;3-DICARBOXYLIC ACID; 1;4;5;6;7;7-HEXACHLORO- |
|--------------------|---------------------------------------------|--------------------------------------|-------------------------------------------------------------|
| Structure          |                                             |                                      |                                                             |
| Actual Endpoint    | Mild                                        | Mild                                 | Moderate_Severe                                             |
| Predicted Endpoint | Mild                                        | Mild                                 | Moderate_Severe                                             |
| Distance           | 0.693                                       | 0.697                                | 0.728                                                       |
| Reference          | 28ZPAK 239;72                               | 28ZPAK-;124;72                       | 28ZPAK-;92;72                                               |

## Model Applicability

Unknown features are fingerprint features in the query molecule, but not found in the training set.

- All properties and OPS components are within expected ranges.

## Feature Contribution

### Top features for positive contribution

| Fingerprint | Bit/Smiles | Feature Structure     | Score | Moderate_Severe in training set |
|-------------|------------|-----------------------|-------|---------------------------------|
| FCFP_10     | 159404153  | <br>[*]CCCNC(=[*])[*] | 0.324 | 15 out of 16                    |

|                                               |                   |                                                                                                                                                |              |                                        |
|-----------------------------------------------|-------------------|------------------------------------------------------------------------------------------------------------------------------------------------|--------------|----------------------------------------|
| FCFP_10                                       | -1106976657       | 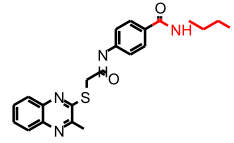<br>[*]C(=[*])NCCCC                                         | 0.317        | 4 out of 4                             |
| FCFP_10                                       | -1272709286       | <br>[*]CCN[*]                                               | 0.285        | 234 out of 266                         |
| <b>Top Features for negative contribution</b> |                   |                                                                                                                                                |              |                                        |
| <b>Fingerprint</b>                            | <b>Bit/Smiles</b> | <b>Feature Structure</b>                                                                                                                       | <b>Score</b> | <b>Moderate_Severe in training set</b> |
| FCFP_10                                       | -581879738        | <br>[*]NC(=O)[c]1:[cH]:[cH]:[cH]:[cH]:1                     | -1.293       | 0 out of 4                             |
| FCFP_10                                       | -790336137        | <br>[*]C(=[*])N[c]1:[cH]:[cH]:[c](:[cH]:[cH]:1)C(=[*])[*] | -0.507       | 0 out of 1                             |
| FCFP_10                                       | -1549103449       | <br>[*]NC(=O)[c](:[*]):[*]<br>]                           | -0.504       | 2 out of 6                             |

15b

TOPKAT\_Ocular\_Irritancy\_Mild\_vs\_Moderate\_Severe

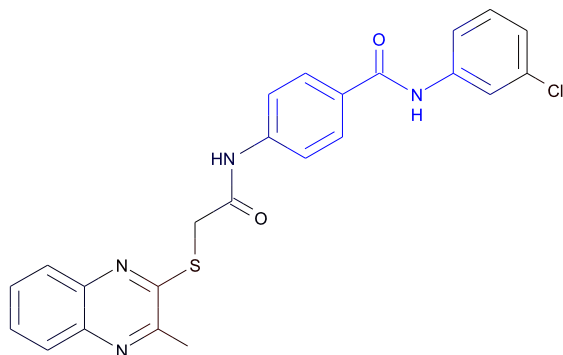C<sub>24</sub>H<sub>19</sub>ClN<sub>4</sub>O<sub>2</sub>S

Molecular Weight: 462.95126

ALogP: 4.743

Rotatable Bonds: 6

Acceptors: 5

Donors: 2

## Model Prediction

Prediction: Mild

Probability: 0.263

Enrichment: 0.382

Bayesian Score: -8.589

Mahalanobis Distance: 7.465

Mahalanobis Distance p-value: 0.987

Prediction: Positive if the Bayesian score is above the estimated best cutoff value from minimizing the false positive and false negative rate.

Probability: The estimated probability that the sample is in the positive category. This assumes that the Bayesian score follows a normal distribution and is different from the prediction using a cutoff.

Enrichment: An estimate of enrichment, that is, the increased likelihood (versus random) of this sample being in the category.

Bayesian Score: The standard Laplacian-modified Bayesian score.

Mahalanobis Distance: The Mahalanobis distance (MD) is the distance to the center of the training data. The larger the MD, the less trustworthy the prediction.

Mahalanobis Distance p-value: The p-value gives the fraction of training data with an MD greater than or equal to the one for the given sample, assuming normally distributed data. The smaller the p-value, the less trustworthy the prediction. For highly non-normal X properties (e.g., fingerprints), the MD p-value is wildly inaccurate.

## Structural Similar Compounds

| Name               | 1-BENZOYLAMINO-4-METHOXY-5-CHLORANTHRAQUINONE | ANTHRAQUINONE; 1;1'-IMINODI- | ANTHRAQUINONE; 1;4-BIS(p-TOLYLAMINO)- |
|--------------------|-----------------------------------------------|------------------------------|---------------------------------------|
| Structure          |                                               |                              |                                       |
| Actual Endpoint    | Mild                                          | Mild                         | Moderate_Severe                       |
| Predicted Endpoint | Mild                                          | Mild                         | Mild                                  |
| Distance           | 0.721                                         | 0.730                        | 0.745                                 |
| Reference          | 28ZPAK-;90;72                                 | 28ZPAK-;125;72               | 28ZPAK -;124;72                       |

## Model Applicability

Unknown features are fingerprint features in the query molecule, but not found in the training set.

- All properties and OPS components are within expected ranges.

## Feature Contribution

### Top features for positive contribution

| Fingerprint | Bit/Smiles | Feature Structure | Score | Moderate_Severe in training set |
|-------------|------------|-------------------|-------|---------------------------------|
| FCFP_10     | -745491832 |                   | 0.304 | 29 out of 32                    |

|                                               |                   |                                                                                                                                                   |              |                                        |
|-----------------------------------------------|-------------------|---------------------------------------------------------------------------------------------------------------------------------------------------|--------------|----------------------------------------|
| FCFP_10                                       | -1513589583       | 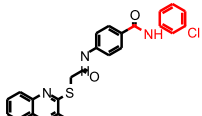<br><chem>[*]C(=[*])N[c]1:[cH]:[cH]:[cH]:[c](Cl):[cH]:1</chem> | 0.256        | 2 out of 2                             |
| FCFP_10                                       | -1410049896       | <br><chem>[*]S[c](:[n:[*]]):[c]([*]):[*]</chem>                | 0.256        | 2 out of 2                             |
| <b>Top Features for negative contribution</b> |                   |                                                                                                                                                   |              |                                        |
| <b>Fingerprint</b>                            | <b>Bit/Smiles</b> | <b>Feature Structure</b>                                                                                                                          | <b>Score</b> | <b>Moderate_Severe in training set</b> |
| FCFP_10                                       | 1175232969        | <br><chem>[*]:[cH]:[c](NC(=O)[c]([*]):[*]):[cH]:[*]</chem>     | -1.293       | 0 out of 4                             |
| FCFP_10                                       | -1925475824       | <br><chem>[*]:[cH]:[c](:[cH]:[*])C(=O)N[c](:[*]):[*]</chem>   | -1.293       | 0 out of 4                             |
| FCFP_10                                       | -581879738        | <br><chem>[*]NC(=O)[c]1:[cH]:[cH]:[*]:[cH]:[cH]:1</chem>     | -1.293       | 0 out of 4                             |

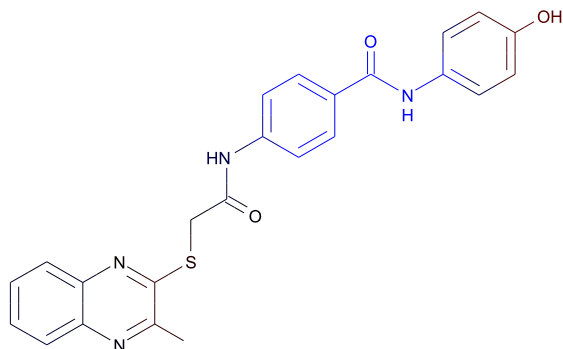

$C_{24}H_{20}N_4O_3S$

Molecular Weight: 444.5056

ALogP: 3.836

Rotatable Bonds: 6

Acceptors: 6

Donors: 3

## Model Prediction

Prediction: Mild

Probability: 0.415

Enrichment: 0.602

Bayesian Score: -7.039

Mahalanobis Distance: 7.499

Mahalanobis Distance p-value: 0.985

Prediction: Positive if the Bayesian score is above the estimated best cutoff value from minimizing the false positive and false negative rate.

Probability: The estimated probability that the sample is in the positive category. This assumes that the Bayesian score follows a normal distribution and is different from the prediction using a cutoff.

Enrichment: An estimate of enrichment, that is, the increased likelihood (versus random) of this sample being in the category.

Bayesian Score: The standard Laplacian-modified Bayesian score.

Mahalanobis Distance: The Mahalanobis distance (MD) is the distance to the center of the training data. The larger the MD, the less trustworthy the prediction.

Mahalanobis Distance p-value: The p-value gives the fraction of training data with an MD greater than or equal to the one for the given sample, assuming normally distributed data. The smaller the p-value, the less trustworthy the prediction. For highly non-normal X properties (e.g., fingerprints), the MD p-value is wildly inaccurate.

## Structural Similar Compounds

| Name               | 4;4'-DIAMINO-1;1'-DIANTHRIMIDE | ANTHRAQUINONE; 1-AMINO-4-HYDROXY-2-PHENOXY- | ANTHRAQUINONE; 1-((2-HYDROXYETHYL)AMINO)-4-(METHYLAMINO)- |
|--------------------|--------------------------------|---------------------------------------------|-----------------------------------------------------------|
| Structure          |                                |                                             |                                                           |
| Actual Endpoint    | Mild                           | Mild                                        | Mild                                                      |
| Predicted Endpoint | Mild                           | Mild                                        | Mild                                                      |
| Distance           | 0.609                          | 0.793                                       | 0.798                                                     |
| Reference          | 28ZPAK-;125;72                 | 28ZPAK 239;72                               | 28ZPAK 245;72                                             |

## Model Applicability

Unknown features are fingerprint features in the query molecule, but not found in the training set.

- All properties and OPS components are within expected ranges.

## Feature Contribution

### Top features for positive contribution

| Fingerprint | Bit/Smiles  | Feature Structure                                | Score | Moderate_Severe in training set |
|-------------|-------------|--------------------------------------------------|-------|---------------------------------|
| FCFP_10     | -1066794953 | <br>[*][c]1:[cH]:[cH]:[c]:[c]<br>(O):[cH]:[cH]:1 | 0.378 | 13 out of 13                    |

|                                               |                   |                                                                                                                                                                                                           |              |                                        |
|-----------------------------------------------|-------------------|-----------------------------------------------------------------------------------------------------------------------------------------------------------------------------------------------------------|--------------|----------------------------------------|
| FCFP_10                                       | -158888774        | 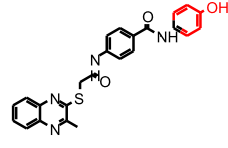<br><chem>Oc1ccc(NC(=O)Nc2ccc(cc2)N(C)S3C=NC=C3)cc1</chem><br><chem>Oc1ccc(NC(=O)Nc2ccc(cc2)N(C)S3C=NC=C3)cc1</chem>   | 0.356        | 24 out of 25                           |
| FCFP_10                                       | -1849978862       | <br><chem>Oc1ccc(NC(=O)Nc2ccc(cc2)N(C)S3C=NC=C3)cc1</chem><br><chem>Oc1ccc(NC(=O)Nc2ccc(cc2)N(C)S3C=NC=C3)cc1</chem>   | 0.256        | 2 out of 2                             |
| <b>Top Features for negative contribution</b> |                   |                                                                                                                                                                                                           |              |                                        |
| <b>Fingerprint</b>                            | <b>Bit/Smiles</b> | <b>Feature Structure</b>                                                                                                                                                                                  | <b>Score</b> | <b>Moderate_Severe in training set</b> |
| FCFP_10                                       | 1175232969        | <br><chem>Oc1ccc(NC(=O)Nc2ccc(cc2)N(C)S3C=NC=C3)cc1</chem><br><chem>Oc1ccc(NC(=O)Nc2ccc(cc2)N(C)S3C=NC=C3)cc1</chem>   | -1.293       | 0 out of 4                             |
| FCFP_10                                       | 241406177         | <br><chem>Oc1ccc(NC(=O)Nc2ccc(cc2)N(C)S3C=NC=C3)cc1</chem><br><chem>Oc1ccc(NC(=O)Nc2ccc(cc2)N(C)S3C=NC=C3)cc1</chem>  | -1.293       | 0 out of 4                             |
| FCFP_10                                       | 384221478         | <br><chem>Oc1ccc(NC(=O)Nc2ccc(cc2)N(C)S3C=NC=C3)cc1</chem><br><chem>Oc1ccc(NC(=O)Nc2ccc(cc2)N(C)S3C=NC=C3)cc1</chem> | -1.293       | 0 out of 4                             |

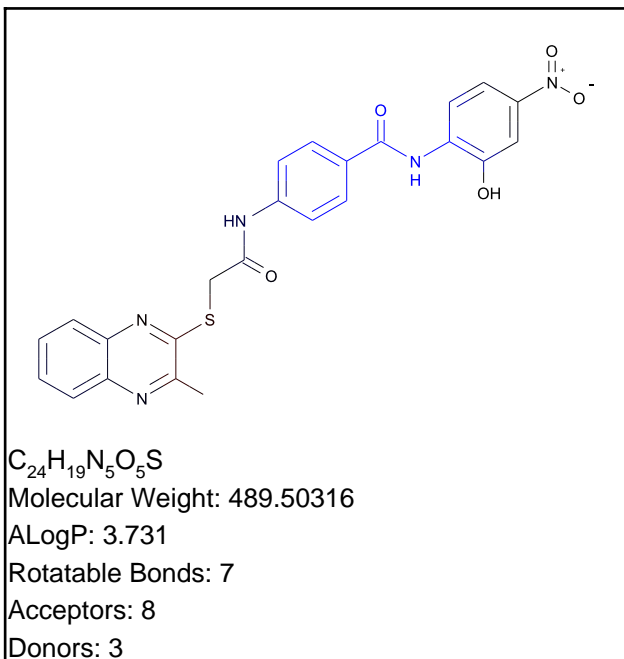

### Model Prediction

Prediction: Mild

Probability: 0.251

Enrichment: 0.364

Bayesian Score: -8.719

Mahalanobis Distance: 7.566

Mahalanobis Distance p-value: 0.981

Prediction: Positive if the Bayesian score is above the estimated best cutoff value from minimizing the false positive and false negative rate.

Probability: The estimated probability that the sample is in the positive category. This assumes that the Bayesian score follows a normal distribution and is different from the prediction using a cutoff.

Enrichment: An estimate of enrichment, that is, the increased likelihood (versus random) of this sample being in the category.

Bayesian Score: The standard Laplacian-modified Bayesian score.

Mahalanobis Distance: The Mahalanobis distance (MD) is the distance to the center of the training data. The larger the MD, the less trustworthy the prediction.

Mahalanobis Distance p-value: The p-value gives the fraction of training data with an MD greater than or equal to the one for the given sample, assuming normally distributed data. The smaller the p-value, the less trustworthy the prediction. For highly non-normal X properties (e.g., fingerprints), the MD p-value is wildly inaccurate.

### Structural Similar Compounds

| Name               | 4;4'-DIAMINO-1;1'-DIANTHRIMIDE | 2;7-NAPHTHALENE DISULFONIC ACID;4-AMINO-5-HYDROXY;-P-TOLUENE SULFONATE (ESTER) | ANTHRAQUINONE; 1;5-DIAMINO-4;8-DIHYDROXY-3-(p-METHOXYPHENYL)- |
|--------------------|--------------------------------|--------------------------------------------------------------------------------|---------------------------------------------------------------|
| Structure          |                                |                                                                                |                                                               |
| Actual Endpoint    | Mild                           | Moderate_Severe                                                                | Mild                                                          |
| Predicted Endpoint | Mild                           | Moderate_Severe                                                                | Mild                                                          |
| Distance           | 0.654                          | 0.772                                                                          | 0.835                                                         |
| Reference          | 28ZPAK-;125;72                 | 28ZPAK-;194;72                                                                 | 28ZPAK 245;72                                                 |

### Model Applicability

Unknown features are fingerprint features in the query molecule, but not found in the training set.

- All properties and OPS components are within expected ranges.
- Unknown FCFP\_2 feature: -828984032: [\*][N+](=[\*])[c](:[\*]):c:[\*]
- Unknown FCFP\_2 feature: -1338588315: [\*]:[c](:[\*])[N+](=O)[O-]
- Unknown FCFP\_2 feature: 1872392852: [\*][N+](=O)[\*]
- Unknown FCFP\_2 feature: 260476081: [\*][N+](=[\*])[O-]

### Feature Contribution

| Top features for positive contribution |             |                                |       |                                 |
|----------------------------------------|-------------|--------------------------------|-------|---------------------------------|
| Fingerprint                            | Bit/Smiles  | Feature Structure              | Score | Moderate_Severe in training set |
| FCFP_10                                | -1410049896 | <br>[*]S[c](:[*]):[c]([*]):[*] | 0.256 | 2 out of 2                      |



| FCFP_10                                | -1539132615 | 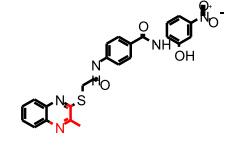<br><chem>[*][c](-[*]):[c](C):n</chem><br><chem>:[*]</chem>                                    | 0.224  | 11 out of 13                    |
|----------------------------------------|-------------|-----------------------------------------------------------------------------------------------------------------------------------------------------------------------------------|--------|---------------------------------|
| FCFP_10                                | 7           | <br><chem>[*]O</chem>                                                                          | 0.219  | 117 out of 142                  |
| Top Features for negative contribution |             |                                                                                                                                                                                   |        |                                 |
| Fingerprint                            | Bit/Smiles  | Feature Structure                                                                                                                                                                 | Score  | Moderate_Severe in training set |
| FCFP_10                                | -1925475824 | <br><chem>[*]:[cH]:[c](:[cH]):[*</chem><br><chem>)]C(=O)N[c](:[*]):[*</chem><br><chem>]</chem> | -1.293 | 0 out of 4                      |
| FCFP_10                                | 1175232969  | <br><chem>[*]:[cH]:[c](NC(=O)[c</chem><br><chem>]:[*]):[*]:[cH]:[*</chem><br><chem>]</chem>   | -1.293 | 0 out of 4                      |
| FCFP_10                                | -581879738  | <br><chem>[*]NC(=O)[c]1:[cH]:[c</chem><br><chem>H]:[*]:[cH]:[cH]:1</chem>                    | -1.293 | 0 out of 4                      |

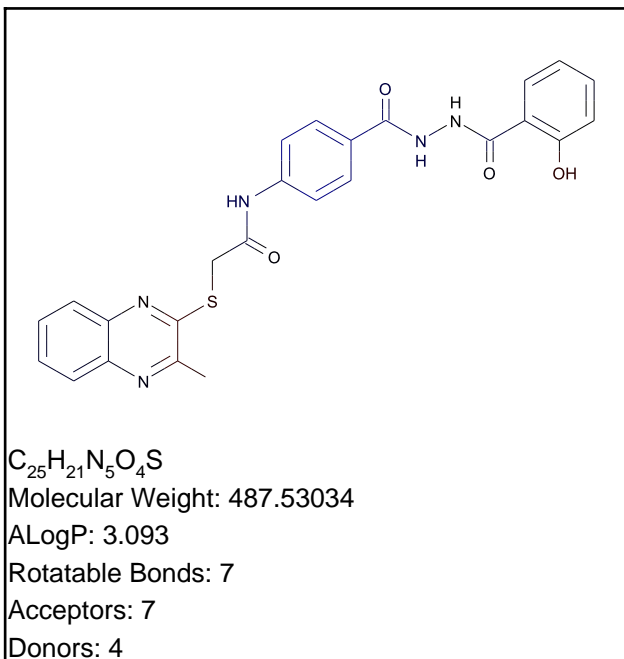

### Model Prediction

Prediction: Mild

Probability: 0.725

Enrichment: 1.053

Bayesian Score: -3.038

Mahalanobis Distance: 8.306

Mahalanobis Distance p-value: 0.84

Prediction: Positive if the Bayesian score is above the estimated best cutoff value from minimizing the false positive and false negative rate.

Probability: The estimated probability that the sample is in the positive category. This assumes that the Bayesian score follows a normal distribution and is different from the prediction using a cutoff.

Enrichment: An estimate of enrichment, that is, the increased likelihood (versus random) of this sample being in the category.

Bayesian Score: The standard Laplacian-modified Bayesian score.

Mahalanobis Distance: The Mahalanobis distance (MD) is the distance to the center of the training data. The larger the MD, the less trustworthy the prediction.

Mahalanobis Distance p-value: The p-value gives the fraction of training data with an MD greater than or equal to the one for the given sample, assuming normally distributed data. The smaller the p-value, the less trustworthy the prediction. For highly non-normal X properties (e.g., fingerprints), the MD p-value is wildly inaccurate.

### Structural Similar Compounds

| Name               | ANTHRAQUINONE; 1;5-DIAMINO-4;8-DIHYDROXY-3-(p-METHOXYPHENYL)-                       | 4;4'-DIAMINO-1;1'-DIANTHRIMIDE                                                      | 2-Naphthalenesulfonic acid; 5;6'-iminobis(1-hydroxy-                                |
|--------------------|-------------------------------------------------------------------------------------|-------------------------------------------------------------------------------------|-------------------------------------------------------------------------------------|
| Structure          | 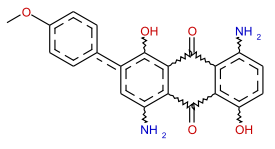 |  |  |
| Actual Endpoint    | Mild                                                                                | Mild                                                                                | Mild                                                                                |
| Predicted Endpoint | Mild                                                                                | Mild                                                                                | Mild                                                                                |
| Distance           | 0.710                                                                               | 0.741                                                                               | 0.809                                                                               |
| Reference          | 28ZPAK 245;72                                                                       | 28ZPAK-;125;72                                                                      | Prehled Prumyslove Toxikologie; Organicke Latky; Marhold; J. pp 1065;86             |

### Model Applicability

Unknown features are fingerprint features in the query molecule, but not found in the training set.

1. All properties and OPS components are within expected ranges.
2. Unknown FCFP\_2 feature: -885461129: [\*]NNC(=[\*])[\*]

### Feature Contribution

#### Top features for positive contribution

| Fingerprint | Bit/Smiles  | Feature Structure                                                                                                     | Score | Moderate_Severe in training set |
|-------------|-------------|-----------------------------------------------------------------------------------------------------------------------|-------|---------------------------------|
| FCFP_10     | -1410049896 | 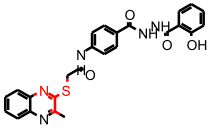<br>[*]S[c](:n:[*]):[c]([*]):[*] | 0.256 | 2 out of 2                      |

|                                               |                   |                                                                                                                                               |              |                                        |
|-----------------------------------------------|-------------------|-----------------------------------------------------------------------------------------------------------------------------------------------|--------------|----------------------------------------|
| FCFP_10                                       | -1539132615       | 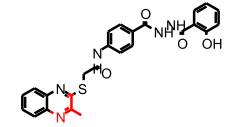<br>[*][c](:[*]):[c](C):n<br>:[*]                          | 0.224        | 11 out of 13                           |
| FCFP_10                                       | 7                 | <br>[*]O                                                   | 0.219        | 117 out of 142                         |
| <b>Top Features for negative contribution</b> |                   |                                                                                                                                               |              |                                        |
| <b>Fingerprint</b>                            | <b>Bit/Smiles</b> | <b>Feature Structure</b>                                                                                                                      | <b>Score</b> | <b>Moderate_Severe in training set</b> |
| FCFP_10                                       | -581879738        | <br>[*]NC(=O)[c]1:[cH]:[cH]:[cH]:[cH]:1                    | -1.293       | 0 out of 4                             |
| FCFP_10                                       | -790336137        | <br>[*]C(=[*])N[c]1:[cH]:[cH]:[c](:[cH]:[cH]:1)C(=[*])[*] | -0.507       | 0 out of 1                             |
| FCFP_10                                       | -1549103449       | <br>[*]NC(=O)[c](:[*]):[*]<br>]                          | -0.504       | 2 out of 6                             |

17a

## TOPKAT\_Ocular\_Irritancy\_Mild\_vs\_Moderate\_Severe

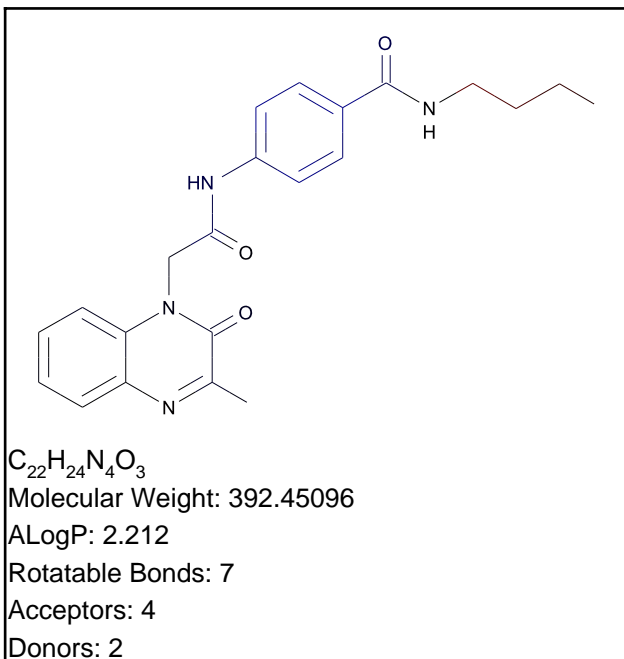**Model Prediction**

Prediction: Mild

Probability: 0.747

Enrichment: 1.085

Bayesian Score: -2.561

Mahalanobis Distance: 12.173

Mahalanobis Distance p-value: 2.7e-005

Prediction: Positive if the Bayesian score is above the estimated best cutoff value from minimizing the false positive and false negative rate.

Probability: The estimated probability that the sample is in the positive category. This assumes that the Bayesian score follows a normal distribution and is different from the prediction using a cutoff.

Enrichment: An estimate of enrichment, that is, the increased likelihood (versus random) of this sample being in the category.

Bayesian Score: The standard Laplacian-modified Bayesian score.

Mahalanobis Distance: The Mahalanobis distance (MD) is the distance to the center of the training data. The larger the MD, the less trustworthy the prediction.

Mahalanobis Distance p-value: The p-value gives the fraction of training data with an MD greater than or equal to the one for the given sample, assuming normally distributed data. The smaller the p-value, the less trustworthy the prediction. For highly non-normal X properties (e.g., fingerprints), the MD p-value is wildly inaccurate.

**Structural Similar Compounds**

| Name               | 5-NORBORNENE-2;3-DICARBOXYLIC ACID; 1;4;5;6;7;7-HEXACHLORO-                         | 1-AMINO-4-BENZOYLAMINO-ANTHRAQUINONE                                                | ANTHRAQUINONE; 1-AMINO-4-HYDROXY-2-PHENOXY-                                         |
|--------------------|-------------------------------------------------------------------------------------|-------------------------------------------------------------------------------------|-------------------------------------------------------------------------------------|
| Structure          | 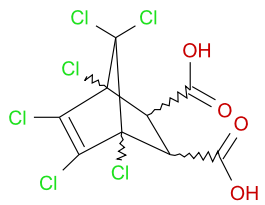 |  |  |
| Actual Endpoint    | Moderate_Severe                                                                     | Mild                                                                                | Mild                                                                                |
| Predicted Endpoint | Moderate_Severe                                                                     | Mild                                                                                | Mild                                                                                |
| Distance           | 0.640                                                                               | 0.641                                                                               | 0.706                                                                               |
| Reference          | 28ZPAK-;92;72                                                                       | 28ZPAK-;124;72                                                                      | 28ZPAK 239;72                                                                       |

**Model Applicability**

Unknown features are fingerprint features in the query molecule, but not found in the training set.

1. All properties and OPS components are within expected ranges.

**Feature Contribution****Top features for positive contribution**

| Fingerprint | Bit/Smiles | Feature Structure                                                                                          | Score | Moderate_Severe in training set |
|-------------|------------|------------------------------------------------------------------------------------------------------------|-------|---------------------------------|
| FCFP_10     | 159404153  | 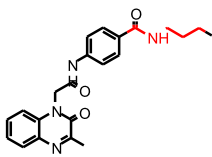<br>[*]CCCNC(=[*])[*] | 0.324 | 15 out of 16                    |

|                                               |                   |                                                                                                                                                           |              |                                        |
|-----------------------------------------------|-------------------|-----------------------------------------------------------------------------------------------------------------------------------------------------------|--------------|----------------------------------------|
| FCFP_10                                       | -1106976657       | 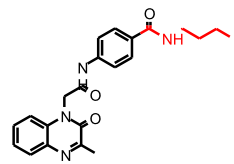<br><chem>[*]C(=[*])NCCCC</chem>                                       | 0.317        | 4 out of 4                             |
| FCFP_10                                       | -1272709286       | <br><chem>[*]CCN[*]</chem>                                             | 0.285        | 234 out of 266                         |
| <b>Top Features for negative contribution</b> |                   |                                                                                                                                                           |              |                                        |
| <b>Fingerprint</b>                            | <b>Bit/Smiles</b> | <b>Feature Structure</b>                                                                                                                                  | <b>Score</b> | <b>Moderate_Severe in training set</b> |
| FCFP_10                                       | -581879738        | <br><chem>[*]NC(=O)[c]1:[cH]:[cH]:[cH]:[cH]:1</chem>                   | -1.293       | 0 out of 4                             |
| FCFP_10                                       | -70433048         | <br><chem>[*]C(=[*])CN1C(=O)C(=[*])[c]1:[cH]:[cH]:[cH]:1</chem>       | -0.507       | 0 out of 1                             |
| FCFP_10                                       | -790336137        | <br><chem>[*]C(=[*])N[c]1:[cH]:[cH]:[c]:[cH]:[cH]:1C(=[*])[*]</chem> | -0.507       | 0 out of 1                             |

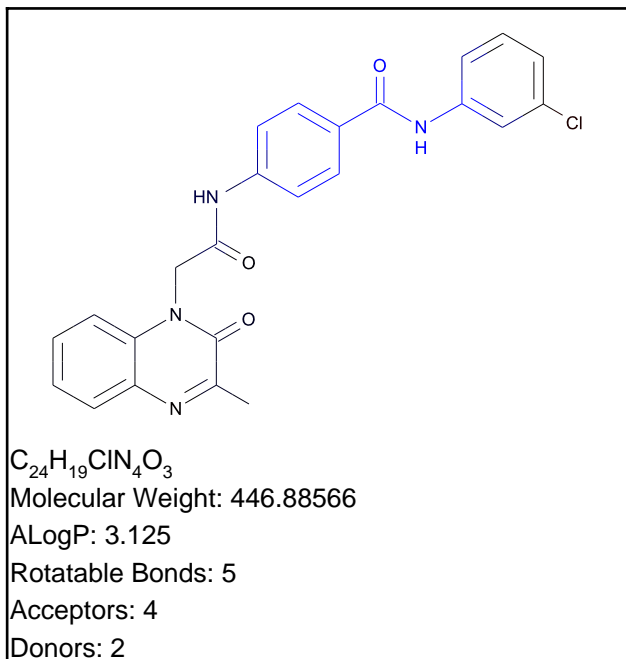

### Model Prediction

Prediction: Mild

Probability: 0.188

Enrichment: 0.273

Bayesian Score: -9.460

Mahalanobis Distance: 11.685

Mahalanobis Distance p-value: 0.000287

Prediction: Positive if the Bayesian score is above the estimated best cutoff value from minimizing the false positive and false negative rate.

Probability: The estimated probability that the sample is in the positive category. This assumes that the Bayesian score follows a normal distribution and is different from the prediction using a cutoff.

Enrichment: An estimate of enrichment, that is, the increased likelihood (versus random) of this sample being in the category.

Bayesian Score: The standard Laplacian-modified Bayesian score.

Mahalanobis Distance: The Mahalanobis distance (MD) is the distance to the center of the training data. The larger the MD, the less trustworthy the prediction.

Mahalanobis Distance p-value: The p-value gives the fraction of training data with an MD greater than or equal to the one for the given sample, assuming normally distributed data. The smaller the p-value, the less trustworthy the prediction. For highly non-normal X properties (e.g., fingerprints), the MD p-value is wildly inaccurate.

### Structural Similar Compounds

| Name               | 5-NORBORNENE-2;3-DICARBOXYLIC ACID; 1;4;5;6;7;7-HEXACHLORO-                         | 1-AMINO-4-BENZOYLAMINO-ANTHRAQUINONE                                                | 1-BENZOYLAMINO-4-METHOXY-5-CHLORANTHRAQUINONE                                       |
|--------------------|-------------------------------------------------------------------------------------|-------------------------------------------------------------------------------------|-------------------------------------------------------------------------------------|
| Structure          | 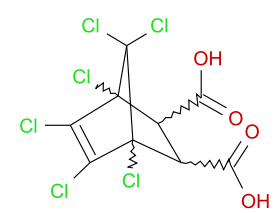 |  |  |
| Actual Endpoint    | Moderate_Severe                                                                     | Mild                                                                                | Mild                                                                                |
| Predicted Endpoint | Moderate_Severe                                                                     | Mild                                                                                | Mild                                                                                |
| Distance           | 0.640                                                                               | 0.650                                                                               | 0.693                                                                               |
| Reference          | 28ZPAK-;92;72                                                                       | 28ZPAK-;124;72                                                                      | 28ZPAK-;90;72                                                                       |

### Model Applicability

Unknown features are fingerprint features in the query molecule, but not found in the training set.

- All properties and OPS components are within expected ranges.

### Feature Contribution

#### Top features for positive contribution

| Fingerprint | Bit/Smiles | Feature Structure                                                                                                                            | Score | Moderate_Severe in training set |
|-------------|------------|----------------------------------------------------------------------------------------------------------------------------------------------|-------|---------------------------------|
| FCFP_10     | -745491832 | 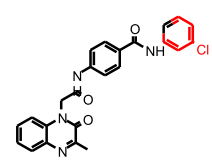<br><chem>[*][c]1:[*]:[cH]:[cH]:[c]([Cl]):[cH]:1</chem> | 0.304 | 29 out of 32                    |

|                                               |                   |                                                                                                                                                     |              |                                        |
|-----------------------------------------------|-------------------|-----------------------------------------------------------------------------------------------------------------------------------------------------|--------------|----------------------------------------|
| FCFP_10                                       | -1513589583       | 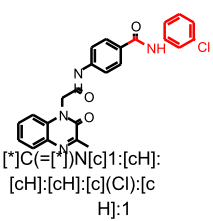<br>[*]C(=[*])N[c]1:[cH]:[cH]:[cH]:[cH]:[c](Cl):[cH]:1           | 0.256        | 2 out of 2                             |
| FCFP_10                                       | 580453787         | <br>[*]C(=N[c](:[*]):[*])<br>[*]                                 | 0.256        | 2 out of 2                             |
| <b>Top Features for negative contribution</b> |                   |                                                                                                                                                     |              |                                        |
| <b>Fingerprint</b>                            | <b>Bit/Smiles</b> | <b>Feature Structure</b>                                                                                                                            | <b>Score</b> | <b>Moderate_Severe in training set</b> |
| FCFP_10                                       | 384221478         | <br>[*][c]1:[cH]:[cH]:[c](:[cH]:[cH]:1)C(=O)N[c](:[*]):[*]       | -1.293       | 0 out of 4                             |
| FCFP_10                                       | 1175232969        | <br>[*]:[cH]:[c](NC(=O)[c]1(:[*]):[*])[cH]:[*]                  | -1.293       | 0 out of 4                             |
| FCFP_10                                       | 241406177         | <br>[*]:[cH]:[c](NC(=O)[c]1:[cH]:[cH]:[*])[cH]:[cH]:1:[cH]:[*] | -1.293       | 0 out of 4                             |

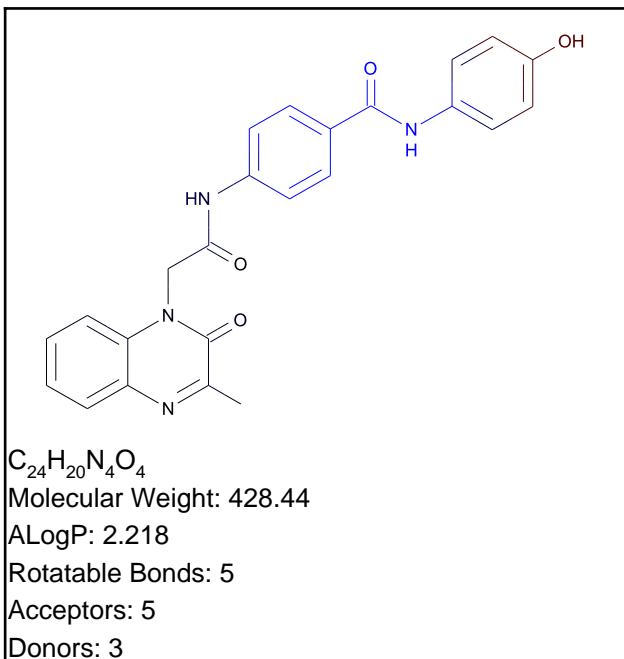

### Model Prediction

Prediction: Mild

Probability: 0.327

Enrichment: 0.474

Bayesian Score: -7.924

Mahalanobis Distance: 11.804

Mahalanobis Distance p-value: 0.000165

Prediction: Positive if the Bayesian score is above the estimated best cutoff value from minimizing the false positive and false negative rate.

Probability: The estimated probability that the sample is in the positive category. This assumes that the Bayesian score follows a normal distribution and is different from the prediction using a cutoff.

Enrichment: An estimate of enrichment, that is, the increased likelihood (versus random) of this sample being in the category.

Bayesian Score: The standard Laplacian-modified Bayesian score.

Mahalanobis Distance: The Mahalanobis distance (MD) is the distance to the center of the training data. The larger the MD, the less trustworthy the prediction.

Mahalanobis Distance p-value: The p-value gives the fraction of training data with an MD greater than or equal to the one for the given sample, assuming normally distributed data. The smaller the p-value, the less trustworthy the prediction. For highly non-normal X properties (e.g., fingerprints), the MD p-value is wildly inaccurate.

### Structural Similar Compounds

| Name               | ANTHRAQUINONE; 1-((2-HYDROXYETHYL)AMINO)-4-(METHYLAMINO)-                           | 4;4'-DIAMINO-1;1'-DIANTHRIMIDE                                                      | 1-AMINO-4-BENZOYLAMINO-ANTHRAQUINONE                                                |
|--------------------|-------------------------------------------------------------------------------------|-------------------------------------------------------------------------------------|-------------------------------------------------------------------------------------|
| Structure          | 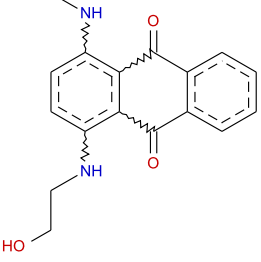 |  |  |
| Actual Endpoint    | Mild                                                                                | Mild                                                                                | Mild                                                                                |
| Predicted Endpoint | Mild                                                                                | Mild                                                                                | Mild                                                                                |
| Distance           | 0.684                                                                               | 0.734                                                                               | 0.736                                                                               |
| Reference          | 28ZPAK 245;72                                                                       | 28ZPAK-;125;72                                                                      | 28ZPAK-;124;72                                                                      |

### Model Applicability

Unknown features are fingerprint features in the query molecule, but not found in the training set.

- All properties and OPS components are within expected ranges.

### Feature Contribution

#### Top features for positive contribution

| Fingerprint | Bit/Smiles  | Feature Structure                                                                                                              | Score | Moderate_Severe in training set |
|-------------|-------------|--------------------------------------------------------------------------------------------------------------------------------|-------|---------------------------------|
| FCFP_10     | -1066794953 | 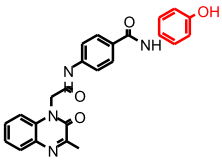<br>[*][c]1:[cH]:[cH]:[c]:(O):[cH]:[cH]:1 | 0.378 | 13 out of 13                    |



|                                               |                   |                                                                                                                                                                  |              |                                        |
|-----------------------------------------------|-------------------|------------------------------------------------------------------------------------------------------------------------------------------------------------------|--------------|----------------------------------------|
| FCFP_10                                       | -158888774        | 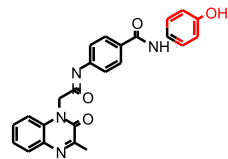<br><chem>O[c]1:[cH]:[cH]:[*]:[cH]:[cH]:1</chem>                              | 0.356        | 24 out of 25                           |
| FCFP_10                                       | 580453787         | <br><chem>[*]C(=N[c](:[*]):[*])</chem>                                        | 0.256        | 2 out of 2                             |
| <b>Top Features for negative contribution</b> |                   |                                                                                                                                                                  |              |                                        |
| <b>Fingerprint</b>                            | <b>Bit/Smiles</b> | <b>Feature Structure</b>                                                                                                                                         | <b>Score</b> | <b>Moderate_Severe in training set</b> |
| FCFP_10                                       | 384221478         | <br><chem>[*][c]1:[cH]:[cH]:[c](:[cH]:[cH]:1)C(=O)N</chem>                    | -1.293       | 0 out of 4                             |
| FCFP_10                                       | 241406177         | <br><chem>[*]:[cH]:[c](NC(=O)[c]1:[cH]:[cH]:[*]:[cH]:[cH]:1)[cH]:[*]</chem> | -1.293       | 0 out of 4                             |
| FCFP_10                                       | -581879738        | <br><chem>[*]NC(=O)[c]1:[cH]:[cH]:[cH]:[cH]:1</chem>                        | -1.293       | 0 out of 4                             |

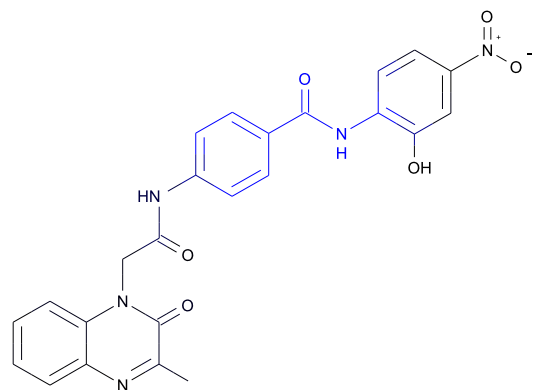
 $C_{24}H_{19}N_5O_6$ 

Molecular Weight: 473.43756

ALogP: 2.113

Rotatable Bonds: 6

Acceptors: 7

Donors: 3

## Model Prediction

Prediction: Mild

Probability: 0.178

Enrichment: 0.258

Bayesian Score: -9.595

Mahalanobis Distance: 11.681

Mahalanobis Distance p-value: 0.000291

Prediction: Positive if the Bayesian score is above the estimated best cutoff value from minimizing the false positive and false negative rate.

Probability: The estimated probability that the sample is in the positive category. This assumes that the Bayesian score follows a normal distribution and is different from the prediction using a cutoff.

Enrichment: An estimate of enrichment, that is, the increased likelihood (versus random) of this sample being in the category.

Bayesian Score: The standard Laplacian-modified Bayesian score.

Mahalanobis Distance: The Mahalanobis distance (MD) is the distance to the center of the training data. The larger the MD, the less trustworthy the prediction.

Mahalanobis Distance p-value: The p-value gives the fraction of training data with an MD greater than or equal to the one for the given sample, assuming normally distributed data. The smaller the p-value, the less trustworthy the prediction. For highly non-normal X properties (e.g., fingerprints), the MD p-value is wildly inaccurate.

## Structural Similar Compounds

| Name               | 4;4'-DIAMINO-1;1'-DIANTHRIMIDE | ANTHRAQUINONE; 1;5-DIAMINO-4;8-DIHYDROXY-3-(p-METHOXYPHENYL)- | 2;7-NAPHTHALENE DISULFONIC ACID;4-AMINO-5-HYDROXY-;P-TOLUENE SULFONATE (ESTER) |
|--------------------|--------------------------------|---------------------------------------------------------------|--------------------------------------------------------------------------------|
| Structure          |                                |                                                               |                                                                                |
| Actual Endpoint    | Mild                           | Mild                                                          | Moderate_Severe                                                                |
| Predicted Endpoint | Mild                           | Mild                                                          | Moderate_Severe                                                                |
| Distance           | 0.674                          | 0.767                                                         | 0.826                                                                          |
| Reference          | 28ZPAK-;125;72                 | 28ZPAK 245;72                                                 | 28ZPAK-;194;72                                                                 |

## Model Applicability

Unknown features are fingerprint features in the query molecule, but not found in the training set.

- All properties and OPS components are within expected ranges.
- Unknown FCFP\_2 feature: -828984032: [\*][N+](=[\*])[c](:[\*]):[\*]
- Unknown FCFP\_2 feature: -1338588315: [\*]:[c](:[\*])[N+](=O)[O-]
- Unknown FCFP\_2 feature: 1872392852: [\*][N+](=O)[\*]
- Unknown FCFP\_2 feature: 260476081: [\*][N+](=[\*])[O-]

## Feature Contribution

| Top features for positive contribution |            |                   |       |                                 |
|----------------------------------------|------------|-------------------|-------|---------------------------------|
| Fingerprint                            | Bit/Smiles | Feature Structure | Score | Moderate_Severe in training set |
| FCFP_10                                | 580453787  |                   | 0.256 | 2 out of 2                      |

|                                               |                   |                                                                                                                                                 |              |                                            |
|-----------------------------------------------|-------------------|-------------------------------------------------------------------------------------------------------------------------------------------------|--------------|--------------------------------------------|
| FCFP_10                                       | 7                 | 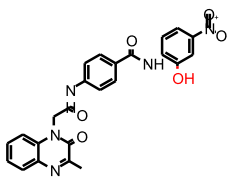<br>[*]O                                                     | 0.219        | 117 out of 142                             |
| FCFP_10                                       | -2007573814       | <br>[*]CN1C(=[*])[*]=N[c]<br>2:[cH]:[*]:[cH]:[cH]<br>:[c]1:2 | 0.186        | 1 out of 1                                 |
| <b>Top Features for negative contribution</b> |                   |                                                                                                                                                 |              |                                            |
| <b>Fingerprint</b>                            | <b>Bit/Smiles</b> | <b>Feature Structure</b>                                                                                                                        | <b>Score</b> | <b>Moderate_Severe<br/>in training set</b> |
| FCFP_10                                       | -581879738        | <br>[*]NC(=O)[c]1:[cH]:[c<br>H]:[*]:[cH]:[cH]:1              | -1.293       | 0 out of 4                                 |
| FCFP_10                                       | -1925475824       | <br>[*]:[cH]:[c]([c]:[cH]:[*<br>])C(=O)N[c]([-*]):[*<br>]   | -1.293       | 0 out of 4                                 |
| FCFP_10                                       | 1175232969        | <br>[*]:[cH]:[c](NC(=O)[c<br>]([*]):[*]):[cH]:[*<br>]      | -1.293       | 0 out of 4                                 |

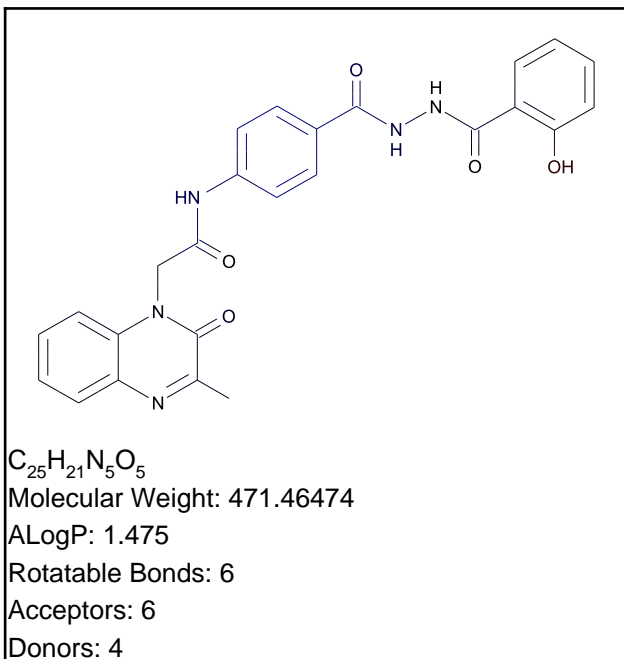

### Model Prediction

Prediction: Mild

Probability: 0.694

Enrichment: 1.008

Bayesian Score: -3.623

Mahalanobis Distance: 12.635

Mahalanobis Distance p-value: 2.21e-006

Prediction: Positive if the Bayesian score is above the estimated best cutoff value from minimizing the false positive and false negative rate.

Probability: The estimated probability that the sample is in the positive category. This assumes that the Bayesian score follows a normal distribution and is different from the prediction using a cutoff.

Enrichment: An estimate of enrichment, that is, the increased likelihood (versus random) of this sample being in the category.  
 Bayesian Score: The standard Laplacian-modified Bayesian score.

Mahalanobis Distance: The Mahalanobis distance (MD) is the distance to the center of the training data. The larger the MD, the less trustworthy the prediction.

Mahalanobis Distance p-value: The p-value gives the fraction of training data with an MD greater than or equal to the one for the given sample, assuming normally distributed data. The smaller the p-value, the less trustworthy the prediction. For highly non-normal X properties (e.g., fingerprints), the MD p-value is wildly inaccurate.

### Structural Similar Compounds

| Name               | ANTHRAQUINONE; 1;5-DIAMINO-4;8-DIHYDROXY-3-(p-METHOXYPHENYL)- | 4;4'-DIAMINO-1;1'-DIANTHRIMIDE | ANTHRAQUINONE; 1-((2-HYDROXYETHYL)AMINO)-4-(METHYLAMINO)- |
|--------------------|---------------------------------------------------------------|--------------------------------|-----------------------------------------------------------|
| Structure          |                                                               |                                |                                                           |
| Actual Endpoint    | Mild                                                          | Mild                           | Mild                                                      |
| Predicted Endpoint | Mild                                                          | Mild                           | Mild                                                      |
| Distance           | 0.704                                                         | 0.818                          | 0.850                                                     |
| Reference          | 28ZPAK 245;72                                                 | 28ZPAK-;125;72                 | 28ZPAK 245;72                                             |

### Model Applicability

Unknown features are fingerprint features in the query molecule, but not found in the training set.

- All properties and OPS components are within expected ranges.
- Unknown FCFP\_2 feature: -885461129: [\*]NNC(=[\*])[\*]

### Feature Contribution

#### Top features for positive contribution

| Fingerprint | Bit/Smiles | Feature Structure                | Score | Moderate_Severe in training set |
|-------------|------------|----------------------------------|-------|---------------------------------|
| FCFP_10     | 580453787  | <br>[*]C(=N[c](:[*]):[*])<br>[*] | 0.256 | 2 out of 2                      |

|                                               |                   |                                                                                                                                                                           |              |                                        |
|-----------------------------------------------|-------------------|---------------------------------------------------------------------------------------------------------------------------------------------------------------------------|--------------|----------------------------------------|
| FCFP_10                                       | 7                 | 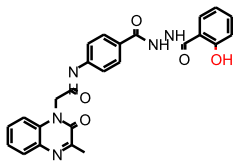 <p>[*]O</p>                                                                           | 0.219        | 117 out of 142                         |
| FCFP_10                                       | 1396546223        |  <p>[*]NC(=O)[c]1:[cH]:[cH]:[cH]:[cH]:[cH]:[cH]:[c]:1O</p>                             | 0.186        | 1 out of 1                             |
| <b>Top Features for negative contribution</b> |                   |                                                                                                                                                                           |              |                                        |
| <b>Fingerprint</b>                            | <b>Bit/Smiles</b> | <b>Feature Structure</b>                                                                                                                                                  | <b>Score</b> | <b>Moderate_Severe in training set</b> |
| FCFP_10                                       | -581879738        |  <p>[*]NC(=O)[c]1:[cH]:[cH]:[cH]:[cH]:[cH]:[cH]:[c]:1</p>                              | -1.293       | 0 out of 4                             |
| FCFP_10                                       | -790336137        |  <p>[*]C(=[*])N[c]1:[cH]:[cH]:[c]([cH]:[cH]:[cH]:[cH]:[cH]:[cH]:[c]:1)C(=[*])[*]</p> | -0.507       | 0 out of 1                             |
| FCFP_10                                       | -70433048         |  <p>[*]C(=[*])CN1C(=O)C(=[*])[c]1:[cH]:[cH]:[cH]:[cH]:[cH]:[cH]:[c]:1</p>            | -0.507       | 0 out of 1                             |

# Sorafenib

# TOPKAT\_Ocular\_Irritancy\_Mild\_vs\_Moderate\_Severe

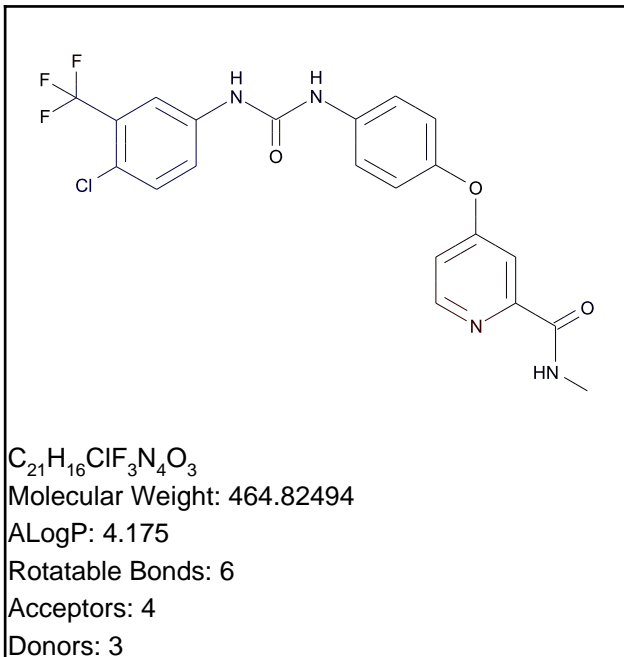

## Model Prediction

Prediction: Mild

Probability: 0.776

Enrichment: 1.127

Bayesian Score: -1.801

Mahalanobis Distance: 8.954

Mahalanobis Distance p-value: 0.537

Prediction: Positive if the Bayesian score is above the estimated best cutoff value from minimizing the false positive and false negative rate.

Probability: The estimated probability that the sample is in the positive category. This assumes that the Bayesian score follows a normal distribution and is different from the prediction using a cutoff.

Enrichment: An estimate of enrichment, that is, the increased likelihood (versus random) of this sample being in the category.

Bayesian Score: The standard Laplacian-modified Bayesian score.

Mahalanobis Distance: The Mahalanobis distance (MD) is the distance to the center of the training data. The larger the MD, the less trustworthy the prediction.

Mahalanobis Distance p-value: The p-value gives the fraction of training data with an MD greater than or equal to the one for the given sample, assuming normally distributed data. The smaller the p-value, the less trustworthy the prediction. For highly non-normal X properties (e.g., fingerprints), the MD p-value is wildly inaccurate.

## Structural Similar Compounds

| Name               | 4;4'-DIAMINO-1;1'-DIANTHRIMIDE                                                      | 5-NORBORNENE-2;3-DICARBOXYLIC ACID; 1;4;5;6;7;7-HEXACHLORO-                         | METHANE;TRIS(4-AMINOPHENYL)-                                                        |
|--------------------|-------------------------------------------------------------------------------------|-------------------------------------------------------------------------------------|-------------------------------------------------------------------------------------|
| Structure          | 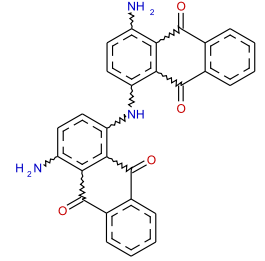 |  |  |
| Actual Endpoint    | Mild                                                                                | Moderate_Severe                                                                     | Moderate_Severe                                                                     |
| Predicted Endpoint | Mild                                                                                | Moderate_Severe                                                                     | Moderate_Severe                                                                     |
| Distance           | 0.799                                                                               | 0.816                                                                               | 0.827                                                                               |
| Reference          | 28ZPAK-;125;72                                                                      | 28ZPAK-;92;72                                                                       | 28ZPAK-;73;72                                                                       |

## Model Applicability

Unknown features are fingerprint features in the query molecule, but not found in the training set.

- All properties and OPS components are within expected ranges.

## Feature Contribution

### Top features for positive contribution

| Fingerprint | Bit/Smiles  | Feature Structure                                                                                                                        | Score | Moderate_Severe in training set |
|-------------|-------------|------------------------------------------------------------------------------------------------------------------------------------------|-------|---------------------------------|
| FCFP_10     | -1695756380 | 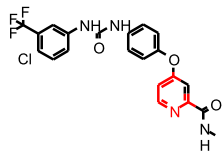<br><chem>[*][c]1:[*]:[c]([*]):n:[cH]:[cH]:1</chem> | 0.285 | 10 out of 11                    |

|                                               |                   |                                                                                                                                               |              |                                        |
|-----------------------------------------------|-------------------|-----------------------------------------------------------------------------------------------------------------------------------------------|--------------|----------------------------------------|
| FCFP_10                                       | -124655670        | 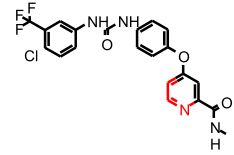<br>[*]:[cH]:[cH]:n:[*]                                    | 0.259        | 14 out of 16                           |
| FCFP_10                                       | -885550502        | <br>[*]CNC(=[*])[*]                                        | 0.239        | 54 out of 64                           |
| <b>Top Features for negative contribution</b> |                   |                                                                                                                                               |              |                                        |
| <b>Fingerprint</b>                            | <b>Bit/Smiles</b> | <b>Feature Structure</b>                                                                                                                      | <b>Score</b> | <b>Moderate_Severe in training set</b> |
| FCFP_10                                       | 2104062943        | <br>[*]C([*])([*])[c]1:[cH]:[*]:[cH]:[cH]:[c]:1Cl          | -0.745       | 7 out of 24                            |
| FCFP_10                                       | -174293376        | <br>[*]N[c]1:[cH]:[cH]:[c](Cl):[c](:[cH]:1)C([*])([*])[*] | -0.507       | 0 out of 1                             |
| FCFP_10                                       | -1549103449       | <br>[*]NC(=O)[c](:[*]):[*]                               | -0.504       | 2 out of 6                             |

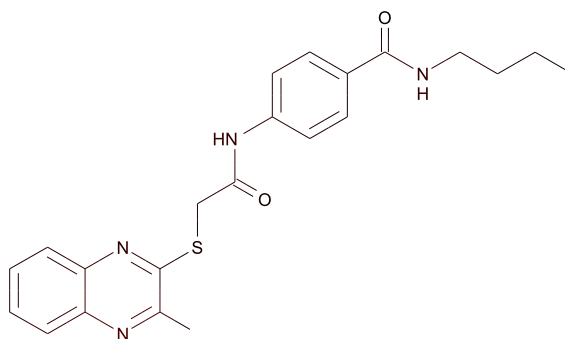

$C_{22}H_{24}N_4O_2S$

Molecular Weight: 408.51656

ALogP: 3.83

Rotatable Bonds: 8

Acceptors: 5

Donors: 2

## Model Prediction

**Prediction: Irritant**

Probability: 1.000

Enrichment: 1.176

Bayesian Score: 3.672

Mahalanobis Distance: 8.675

Mahalanobis Distance p-value: 0.684

Prediction: Positive if the Bayesian score is above the estimated best cutoff value from minimizing the false positive and false negative rate.

Probability: The estimated probability that the sample is in the positive category. This assumes that the Bayesian score follows a normal distribution and is different from the prediction using a cutoff.

Enrichment: An estimate of enrichment, that is, the increased likelihood (versus random) of this sample being in the category.

Bayesian Score: The standard Laplacian-modified Bayesian score.

Mahalanobis Distance: The Mahalanobis distance (MD) is the distance to the center of the training data. The larger the MD, the less trustworthy the prediction.

Mahalanobis Distance p-value: The p-value gives the fraction of training data with an MD greater than or equal to the one for the given sample, assuming normally distributed data. The smaller the p-value, the less trustworthy the prediction. For highly non-normal X properties (e.g., fingerprints), the MD p-value is wildly inaccurate.

## Structural Similar Compounds

| Name               | ANTHRAQUINONE; 1-AMINO-4-HYDROXY-2-PHENOXY- | 1-AMINO-4-BENZOYLAMINO-ANTHRAQUINONE | BENZANILIDE;2';2'''-DITHIOBIS- |
|--------------------|---------------------------------------------|--------------------------------------|--------------------------------|
| Structure          |                                             |                                      |                                |
| Actual Endpoint    | Irritant                                    | Irritant                             | Non-Irritant                   |
| Predicted Endpoint | Irritant                                    | Irritant                             | Non-Irritant                   |
| Distance           | 0.679                                       | 0.681                                | 0.686                          |
| Reference          | 28ZPAK 239;72                               | 28ZPAK-;124;72                       | 28ZPAK-;173;72                 |

## Model Applicability

Unknown features are fingerprint features in the query molecule, but not found in the training set.

1. All properties and OPS components are within expected ranges.

## Feature Contribution

### Top features for positive contribution

| Fingerprint | Bit/Smiles | Feature Structure                | Score | Irritant in training set |
|-------------|------------|----------------------------------|-------|--------------------------|
| FCFP_12     | 1747237384 | <br>[*][c](:[*]):n:[c](:[*]):[*] | 0.208 | 44 out of 44             |



|                                               |                   |                                                                                                                                    |              |                                 |
|-----------------------------------------------|-------------------|------------------------------------------------------------------------------------------------------------------------------------|--------------|---------------------------------|
| FCFP_12                                       | 178336375         | 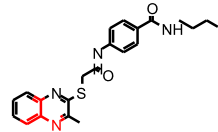<br>[*]:[cH]:[c](:n:[*]):<br>[c](:[*]):[*]      | 0.202        | 19 out of 19                    |
| FCFP_12                                       | 713358128         | <br>[*]:n:[c]1:[cH]:[cH]:<br>[cH]:[*]:[c]:1:[*] | 0.200        | 17 out of 17                    |
| <b>Top Features for negative contribution</b> |                   |                                                                                                                                    |              |                                 |
| <b>Fingerprint</b>                            | <b>Bit/Smiles</b> | <b>Feature Structure</b>                                                                                                           | <b>Score</b> | <b>Irritant in training set</b> |
| FCFP_12                                       | -1577600103       | <br>[*]CCCC                                     | -0.090       | 217 out of 294                  |
| FCFP_12                                       | -1272798659       | <br>[*]CCC[*]                                 | 0.000        | 517 out of 643                  |
| FCFP_12                                       | 203677720         | <br>[*]C(=[*])[c](:[cH]:[<br>*]):[cH]:[*]     | 0.000        | 319 out of 382                  |

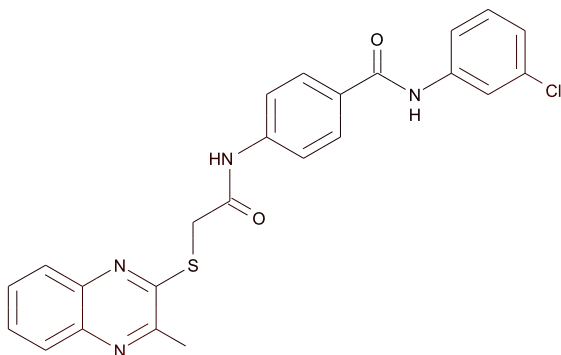

$C_{24}H_{19}ClN_4O_2S$

Molecular Weight: 462.95126

ALogP: 4.743

Rotatable Bonds: 6

Acceptors: 5

Donors: 2

## Model Prediction

**Prediction: Irritant**

Probability: 1.000

Enrichment: 1.176

Bayesian Score: 4.245

Mahalanobis Distance: 6.333

Mahalanobis Distance p-value: 1

Prediction: Positive if the Bayesian score is above the estimated best cutoff value from minimizing the false positive and false negative rate.

Probability: The estimated probability that the sample is in the positive category. This assumes that the Bayesian score follows a normal distribution and is different from the prediction using a cutoff.

Enrichment: An estimate of enrichment, that is, the increased likelihood (versus random) of this sample being in the category.

Bayesian Score: The standard Laplacian-modified Bayesian score.

Mahalanobis Distance: The Mahalanobis distance (MD) is the distance to the center of the training data. The larger the MD, the less trustworthy the prediction.

Mahalanobis Distance p-value: The p-value gives the fraction of training data with an MD greater than or equal to the one for the given sample, assuming normally distributed data. The smaller the p-value, the less trustworthy the prediction. For highly non-normal X properties (e.g., fingerprints), the MD p-value is wildly inaccurate.

## Structural Similar Compounds

| Name               | BENZANILIDE;2';2'''-DITHIOBIS-                                                      | 1-BENZOYLAMINO-4-METHOXY-5-CHLORANTHRAQUINONE                                       | ANTHRAQUINONE; 1;4-BIS(p-TOLYLAMINO)-                                               |
|--------------------|-------------------------------------------------------------------------------------|-------------------------------------------------------------------------------------|-------------------------------------------------------------------------------------|
| Structure          | 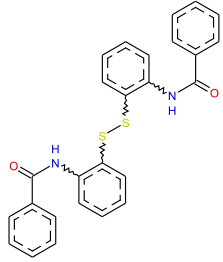 |  |  |
| Actual Endpoint    | Non-Irritant                                                                        | Irritant                                                                            | Irritant                                                                            |
| Predicted Endpoint | Non-Irritant                                                                        | Irritant                                                                            | Non-Irritant                                                                        |
| Distance           | 0.587                                                                               | 0.721                                                                               | 0.727                                                                               |
| Reference          | 28ZPAK-;173;72                                                                      | 28ZPAK-;90;72                                                                       | 28ZPAK -;124;72                                                                     |

## Model Applicability

Unknown features are fingerprint features in the query molecule, but not found in the training set.

1. All properties and OPS components are within expected ranges.

## Feature Contribution

### Top features for positive contribution

| Fingerprint | Bit/Smiles | Feature Structure                                                                                                     | Score | Irritant in training set |
|-------------|------------|-----------------------------------------------------------------------------------------------------------------------|-------|--------------------------|
| FCFP_12     | 1747237384 | 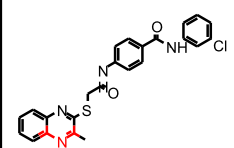<br>[*][c](:[*]):n:[c](:[*]):[*] | 0.208 | 44 out of 44             |

|                                               |                   |                                                                                                                                    |              |                                 |
|-----------------------------------------------|-------------------|------------------------------------------------------------------------------------------------------------------------------------|--------------|---------------------------------|
| FCFP_12                                       | 178336375         | 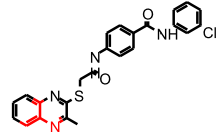<br>[*]:[cH]:[c](:n:[*]):<br>[c](:[*]):[*]      | 0.202        | 19 out of 19                    |
| FCFP_12                                       | 713358128         | <br>[*]:n:[c]1:[cH]:[cH]:<br>[cH]:[*]:[c]:1:[*] | 0.200        | 17 out of 17                    |
| <b>Top Features for negative contribution</b> |                   |                                                                                                                                    |              |                                 |
| <b>Fingerprint</b>                            | <b>Bit/Smiles</b> | <b>Feature Structure</b>                                                                                                           | <b>Score</b> | <b>Irritant in training set</b> |
| FCFP_12                                       | 203677720         | <br>[*]C(=[*])[c](:[cH]:[<br>*]):[cH]:[*]       | 0.000        | 319 out of 382                  |
| FCFP_12                                       | 1872154524        | <br>[*]C(=O)[*]                                | 0.000        | 563 out of 690                  |
| FCFP_12                                       | -1272768868       | <br>[*]SCC(=[*])[*]                           | 0.000        | 396 out of 514                  |

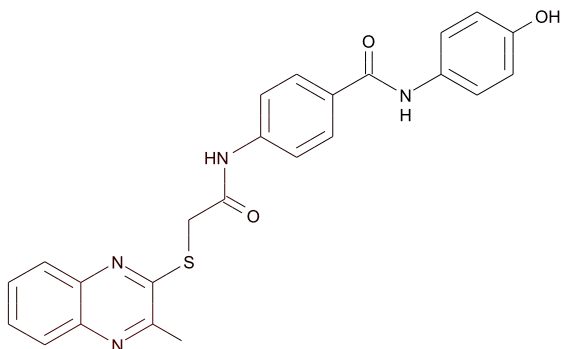

$C_{24}H_{20}N_4O_3S$

Molecular Weight: 444.5056

ALogP: 3.836

Rotatable Bonds: 6

Acceptors: 6

Donors: 3

## Model Prediction

**Prediction: Irritant**

Probability: 1.000

Enrichment: 1.176

Bayesian Score: 3.311

Mahalanobis Distance: 6.595

Mahalanobis Distance p-value: 1

Prediction: Positive if the Bayesian score is above the estimated best cutoff value from minimizing the false positive and false negative rate.

Probability: The estimated probability that the sample is in the positive category. This assumes that the Bayesian score follows a normal distribution and is different from the prediction using a cutoff.

Enrichment: An estimate of enrichment, that is, the increased likelihood (versus random) of this sample being in the category.

Bayesian Score: The standard Laplacian-modified Bayesian score.

Mahalanobis Distance: The Mahalanobis distance (MD) is the distance to the center of the training data. The larger the MD, the less trustworthy the prediction.

Mahalanobis Distance p-value: The p-value gives the fraction of training data with an MD greater than or equal to the one for the given sample, assuming normally distributed data. The smaller the p-value, the less trustworthy the prediction. For highly non-normal X properties (e.g., fingerprints), the MD p-value is wildly inaccurate.

## Structural Similar Compounds

| Name               | 4;4'-DIAMINO-1;1'-DIANTHRIMIDE | Disperse Black 9                    | ANTHRAQUINONE; 1-((2-HYDROXYETHYL)AMINO)-4-(METHYLAMINO)- |
|--------------------|--------------------------------|-------------------------------------|-----------------------------------------------------------|
| Structure          |                                |                                     |                                                           |
| Actual Endpoint    | Irritant                       | Non-Irritant                        | Irritant                                                  |
| Predicted Endpoint | Irritant                       | Non-Irritant                        | Irritant                                                  |
| Distance           | 0.603                          | 0.737                               | 0.776                                                     |
| Reference          | 28ZPAK-;125;72                 | J. Am. Coll. Toxicol. 5(3):205;1986 | 28ZPAK 245;72                                             |

## Model Applicability

Unknown features are fingerprint features in the query molecule, but not found in the training set.

1. All properties and OPS components are within expected ranges.

## Feature Contribution

### Top features for positive contribution

| Fingerprint | Bit/Smiles | Feature Structure                | Score | Irritant in training set |
|-------------|------------|----------------------------------|-------|--------------------------|
| FCFP_12     | 1747237384 | <br>[*][c](:[*]):n:[c](:[*]):[*] | 0.208 | 44 out of 44             |

| FCFP_12                                | 178336375   | 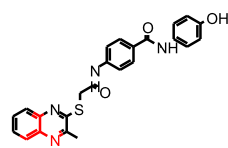<br>[*]:[cH]:[c](:[*]):<br>[c](:[*]):[*]        | 0.202  | 19 out of 19             |
|----------------------------------------|-------------|------------------------------------------------------------------------------------------------------------------------------------|--------|--------------------------|
| FCFP_12                                | 713358128   | <br>[*]:n:[c]1:[cH]:[cH]:<br>[cH]:[*]:[c]:1:[*] | 0.200  | 17 out of 17             |
| Top Features for negative contribution |             |                                                                                                                                    |        |                          |
| Fingerprint                            | Bit/Smiles  | Feature Structure                                                                                                                  | Score  | Irritant in training set |
| FCFP_12                                | -1849978862 | <br>[*]N[c]1:[cH]:[cH]:[c<br>](O):[cH]:[cH]:1   | -0.132 | 2 out of 3               |
| FCFP_12                                | -1066794953 | <br>[*][c]1:[cH]:[cH]:[c]<br>(O):[cH]:[cH]:1   | -0.051 | 13 out of 17             |
| FCFP_12                                | -1272768868 | <br>[*]SCC(=[*])[*]                           | 0.000  | 396 out of 514           |

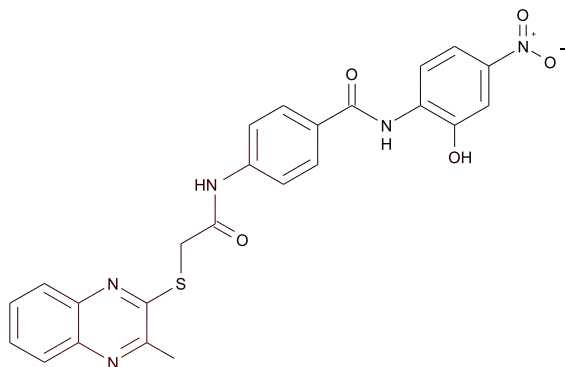

$C_{24}H_{19}N_5O_5S$

Molecular Weight: 489.50316

ALogP: 3.731

Rotatable Bonds: 7

Acceptors: 8

Donors: 3

## Model Prediction

Prediction: Irritant

Probability: 1.000

Enrichment: 1.176

Bayesian Score: 3.642

Mahalanobis Distance: 6.798

Mahalanobis Distance p-value: 0.999

Prediction: Positive if the Bayesian score is above the estimated best cutoff value from minimizing the false positive and false negative rate.

Probability: The estimated probability that the sample is in the positive category. This assumes that the Bayesian score follows a normal distribution and is different from the prediction using a cutoff.

Enrichment: An estimate of enrichment, that is, the increased likelihood (versus random) of this sample being in the category.

Bayesian Score: The standard Laplacian-modified Bayesian score.

Mahalanobis Distance: The Mahalanobis distance (MD) is the distance to the center of the training data. The larger the MD, the less trustworthy the prediction.

Mahalanobis Distance p-value: The p-value gives the fraction of training data with an MD greater than or equal to the one for the given sample, assuming normally distributed data. The smaller the p-value, the less trustworthy the prediction. For highly non-normal X properties (e.g., fingerprints), the MD p-value is wildly inaccurate.

## Structural Similar Compounds

| Name               | 4;4'-DIAMINO-1;1'-DIANTHRIMIDE | 2;7-NAPHTHALENE DISULFONIC ACID;4-AMINO-5-HYDROXY;-P-TOLUENE SULFONATE (ESTER) | ANTHRAQUINONE; 1;5-DIAMINO-4;8-DIHYDROXY-3-(p-METHOXYPHENYL)- |
|--------------------|--------------------------------|--------------------------------------------------------------------------------|---------------------------------------------------------------|
| Structure          |                                |                                                                                |                                                               |
| Actual Endpoint    | Irritant                       | Irritant                                                                       | Irritant                                                      |
| Predicted Endpoint | Irritant                       | Irritant                                                                       | Irritant                                                      |
| Distance           | 0.646                          | 0.763                                                                          | 0.821                                                         |
| Reference          | 28ZPAK-;125;72                 | 28ZPAK-;194;72                                                                 | 28ZPAK 245;72                                                 |

## Model Applicability

Unknown features are fingerprint features in the query molecule, but not found in the training set.

1. All properties and OPS components are within expected ranges.
2. Unknown FCFP\_2 feature: -828984032: [\*][N+](=[\*])[c](:[\*]):[\*]
3. Unknown FCFP\_2 feature: -1338588315: [\*]:[c](:[\*])[N+](=O)[O-]
4. Unknown FCFP\_2 feature: 1872392852: [\*][N+](=O)[\*]
5. Unknown FCFP\_2 feature: 260476081: [\*][N+](=[\*])[O-]

## Feature Contribution

### Top features for positive contribution

| Fingerprint | Bit/Smiles | Feature Structure                | Score | Irritant in training set |
|-------------|------------|----------------------------------|-------|--------------------------|
| FCFP_12     | 1747237384 | <br>[*][c](:[*]):n:[c](:[*]):[*] | 0.208 | 44 out of 44             |

|                                               |                   |                                                                                                                                     |              |                                 |
|-----------------------------------------------|-------------------|-------------------------------------------------------------------------------------------------------------------------------------|--------------|---------------------------------|
| FCFP_12                                       | 178336375         | 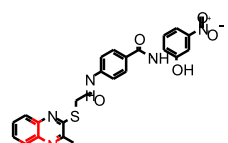<br>[*]:[cH]:[c](:[*]):<br>[c](:[*]):[*]         | 0.202        | 19 out of 19                    |
| FCFP_12                                       | 713358128         | <br>[*]:n:[c]1:[cH]:[cH]:<br>[cH]:[*]:[c]:1:[*]  | 0.200        | 17 out of 17                    |
| <b>Top Features for negative contribution</b> |                   |                                                                                                                                     |              |                                 |
| <b>Fingerprint</b>                            | <b>Bit/Smiles</b> | <b>Feature Structure</b>                                                                                                            | <b>Score</b> | <b>Irritant in training set</b> |
| FCFP_12                                       | 8                 | <br>[*][N+](=[*])[*]                             | -0.056       | 3 out of 4                      |
| FCFP_12                                       | 203677720         | <br>[*]C(=[*])[c](:[cH]:[<br>*]):[cH]:[*]       | 0.000        | 319 out of 382                  |
| FCFP_12                                       | -773983804        | <br>[*]N[c]1:[cH]:[*]:[c]<br>([*]):[cH]:[cH]:1 | 0.000        | 102 out of 121                  |

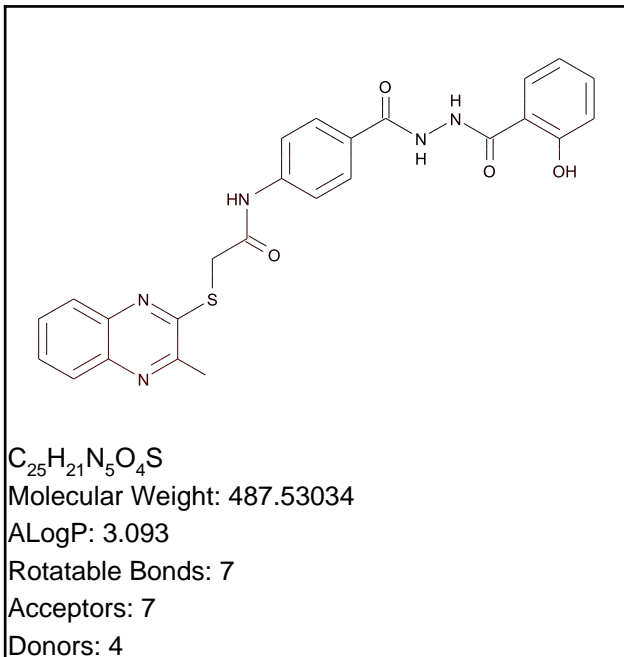

### Model Prediction

**Prediction:** Irritant

Probability: 1.000

Enrichment: 1.176

Bayesian Score: 3.768

Mahalanobis Distance: 7.692

Mahalanobis Distance p-value: 0.97

Prediction: Positive if the Bayesian score is above the estimated best cutoff value from minimizing the false positive and false negative rate.

Probability: The estimated probability that the sample is in the positive category. This assumes that the Bayesian score follows a normal distribution and is different from the prediction using a cutoff.

Enrichment: An estimate of enrichment, that is, the increased likelihood (versus random) of this sample being in the category.

Bayesian Score: The standard Laplacian-modified Bayesian score.

Mahalanobis Distance: The Mahalanobis distance (MD) is the distance to the center of the training data. The larger the MD, the less trustworthy the prediction.

Mahalanobis Distance p-value: The p-value gives the fraction of training data with an MD greater than or equal to the one for the given sample, assuming normally distributed data. The smaller the p-value, the less trustworthy the prediction. For highly non-normal X properties (e.g., fingerprints), the MD p-value is wildly inaccurate.

### Structural Similar Compounds

| Name               | ANTHRAQUINONE; 1;5-DIAMINO-4;8-DIHYDROXY-3-(p-METHOXYPHENYL)- | 4;4'-DIAMINO-1;1'-DIANTHRIMIDE | 2-Naphthalenesulfonic acid; 5;6'-iminobis(1-hydroxy-                    |
|--------------------|---------------------------------------------------------------|--------------------------------|-------------------------------------------------------------------------|
| Structure          |                                                               |                                |                                                                         |
| Actual Endpoint    | Irritant                                                      | Irritant                       | Irritant                                                                |
| Predicted Endpoint | Irritant                                                      | Irritant                       | Irritant                                                                |
| Distance           | 0.697                                                         | 0.736                          | 0.808                                                                   |
| Reference          | 28ZPAK 245;72                                                 | 28ZPAK-;125;72                 | Prehled Prumyslove Toxikologie; Organicke Latky; Marhold; J. pp 1065;86 |

### Model Applicability

Unknown features are fingerprint features in the query molecule, but not found in the training set.

1. All properties and OPS components are within expected ranges.
2. Unknown FCFP\_2 feature: -885461129: [\*]NNC(=[\*])[\*]

### Feature Contribution

#### Top features for positive contribution

| Fingerprint | Bit/Smiles | Feature Structure                             | Score | Irritant in training set |
|-------------|------------|-----------------------------------------------|-------|--------------------------|
| FCFP_12     | 1747237384 | <br><chem>[*][c](:[*]):n:[c](:[*]):[*]</chem> | 0.208 | 44 out of 44             |



|                                               |                   |                                                                                                                                            |              |                                 |
|-----------------------------------------------|-------------------|--------------------------------------------------------------------------------------------------------------------------------------------|--------------|---------------------------------|
| FCFP_12                                       | 178336375         | 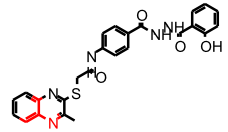<br>[*]:[cH]:[c]:[n:[*]):<br>[c]:[*]:[*]                | 0.202        | 19 out of 19                    |
| FCFP_12                                       | 713358128         | <br>[*]:n:[c]1:[cH]:[cH]:<br>[cH]:[*]:[c]:1:[*]         | 0.200        | 17 out of 17                    |
| <b>Top Features for negative contribution</b> |                   |                                                                                                                                            |              |                                 |
| <b>Fingerprint</b>                            | <b>Bit/Smiles</b> | <b>Feature Structure</b>                                                                                                                   | <b>Score</b> | <b>Irritant in training set</b> |
| FCFP_12                                       | -1698724694       | <br>[*]C(=[*])[c]1:[cH]:[<br>cH]:[cH]:[cH]:[c]:1[<br>*] | -0.096       | 107 out of 146                  |
| FCFP_12                                       | 1                 | <br>[*]=O                                              | 0.000        | 872 out of 1051                 |
| FCFP_12                                       | 1872154524        | <br>[*]C(=O)[*]                                       | 0.000        | 563 out of 690                  |

17a

TOPKAT\_Ocular\_Irritancy\_None\_vs\_Irritant

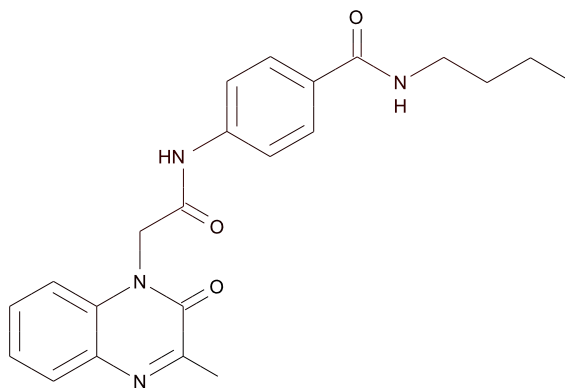C<sub>22</sub>H<sub>24</sub>N<sub>4</sub>O<sub>3</sub>

Molecular Weight: 392.45096

ALogP: 2.212

Rotatable Bonds: 7

Acceptors: 4

Donors: 2

### Model Prediction

Prediction: Irritant

Probability: 1.000

Enrichment: 1.176

Bayesian Score: 2.098

Mahalanobis Distance: 10.517

Mahalanobis Distance p-value: 0.0231

Prediction: Positive if the Bayesian score is above the estimated best cutoff value from minimizing the false positive and false negative rate.

Probability: The estimated probability that the sample is in the positive category. This assumes that the Bayesian score follows a normal distribution and is different from the prediction using a cutoff.

Enrichment: An estimate of enrichment, that is, the increased likelihood (versus random) of this sample being in the category.

Bayesian Score: The standard Laplacian-modified Bayesian score.

Mahalanobis Distance: The Mahalanobis distance (MD) is the distance to the center of the training data. The larger the MD, the less trustworthy the prediction.

Mahalanobis Distance p-value: The p-value gives the fraction of training data with an MD greater than or equal to the one for the given sample, assuming normally distributed data. The smaller the p-value, the less trustworthy the prediction. For highly non-normal X properties (e.g., fingerprints), the MD p-value is wildly inaccurate.

### Structural Similar Compounds

| Name               | 5-NORBORNENE-2;3-DICARBOXYLIC ACID; 1;4;5;6;7;7-HEXACHLORO- | 1-AMINO-4-BENZOYLAMINO-ANTHRAQUINONE | ANTHRAQUINONE; 1-AMINO-4-HYDROXY-2-PHENOXY- |
|--------------------|-------------------------------------------------------------|--------------------------------------|---------------------------------------------|
| Structure          |                                                             |                                      |                                             |
| Actual Endpoint    | Irritant                                                    | Irritant                             | Irritant                                    |
| Predicted Endpoint | Irritant                                                    | Irritant                             | Irritant                                    |
| Distance           | 0.627                                                       | 0.631                                | 0.692                                       |
| Reference          | 28ZPAK-;92;72                                               | 28ZPAK-;124;72                       | 28ZPAK 239;72                               |

### Model Applicability

Unknown features are fingerprint features in the query molecule, but not found in the training set.

- All properties and OPS components are within expected ranges.

### Feature Contribution

#### Top features for positive contribution

| Fingerprint | Bit/Smiles | Feature Structure                       | Score | Irritant in training set |
|-------------|------------|-----------------------------------------|-------|--------------------------|
| FCFP_12     | 1175665944 | <br>[*]CC(=O)N(c)[c]([cH]:[*]);[cH]:[*] | 0.198 | 14 out of 14             |

|                                               |                   |                                                                                                                                |              |                                 |
|-----------------------------------------------|-------------------|--------------------------------------------------------------------------------------------------------------------------------|--------------|---------------------------------|
| FCFP_12                                       | -885550502        | 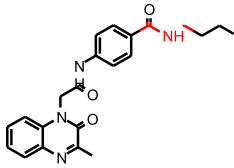<br><chem>[*]CNC(=[*])[*]</chem>            | 0.180        | 64 out of 66                    |
| FCFP_12                                       | -1106976657       | <br><chem>[*]C(=[*])NCCCC</chem>            | 0.167        | 4 out of 4                      |
| <b>Top Features for negative contribution</b> |                   |                                                                                                                                |              |                                 |
| <b>Fingerprint</b>                            | <b>Bit/Smiles</b> | <b>Feature Structure</b>                                                                                                       | <b>Score</b> | <b>Irritant in training set</b> |
| FCFP_12                                       | 580453787         | <br><chem>[*]C(=[N[c](:[*]):[*]])[*]</chem> | -0.132       | 2 out of 3                      |
| FCFP_12                                       | -1577600103       | <br><chem>[*]CCCC</chem>                  | -0.090       | 217 out of 294                  |
| FCFP_12                                       | 565998553         | <br><chem>[*]N([*])C(=O)C(=[*])[*]</chem> | -0.066       | 198 out of 262                  |

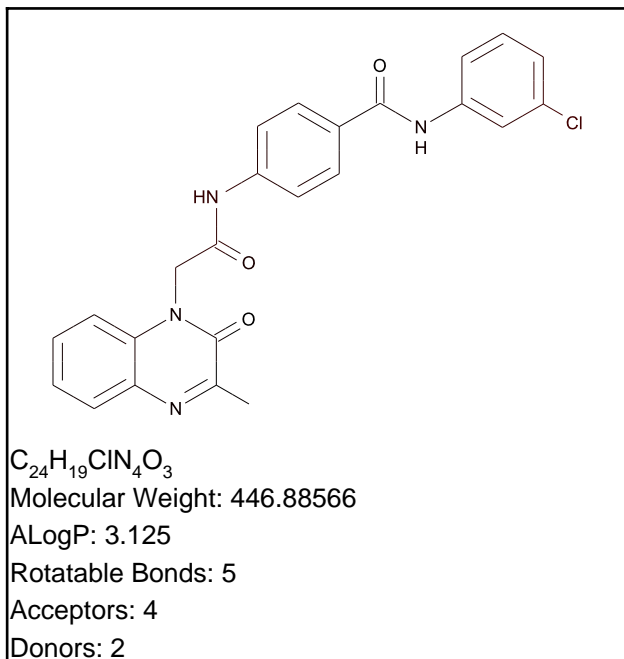

### Model Prediction

Prediction: Irritant

Probability: 1.000

Enrichment: 1.176

Bayesian Score: 2.492

Mahalanobis Distance: 8.833

Mahalanobis Distance p-value: 0.602

Prediction: Positive if the Bayesian score is above the estimated best cutoff value from minimizing the false positive and false negative rate.

Probability: The estimated probability that the sample is in the positive category. This assumes that the Bayesian score follows a normal distribution and is different from the prediction using a cutoff.

Enrichment: An estimate of enrichment, that is, the increased likelihood (versus random) of this sample being in the category.

Bayesian Score: The standard Laplacian-modified Bayesian score.

Mahalanobis Distance: The Mahalanobis distance (MD) is the distance to the center of the training data. The larger the MD, the less trustworthy the prediction.

Mahalanobis Distance p-value: The p-value gives the fraction of training data with an MD greater than or equal to the one for the given sample, assuming normally distributed data. The smaller the p-value, the less trustworthy the prediction. For highly non-normal X properties (e.g., fingerprints), the MD p-value is wildly inaccurate.

### Structural Similar Compounds

| Name               | 5-NORBORNENE-2;3-DICARBOXYLIC ACID; 1;4;5;6;7;7-HEXACHLORO-                         | 1-AMINO-4-BENZOYLAMINO-ANTHRAQUINONE                                                | 1-BENZOYLAMINO-4-METHOXY-5-CHLORANTHRAQUINONE                                       |
|--------------------|-------------------------------------------------------------------------------------|-------------------------------------------------------------------------------------|-------------------------------------------------------------------------------------|
| Structure          | 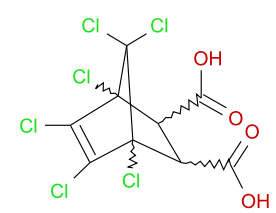 |  |  |
| Actual Endpoint    | Irritant                                                                            | Irritant                                                                            | Irritant                                                                            |
| Predicted Endpoint | Irritant                                                                            | Irritant                                                                            | Irritant                                                                            |
| Distance           | 0.630                                                                               | 0.645                                                                               | 0.692                                                                               |
| Reference          | 28ZPAK-;92;72                                                                       | 28ZPAK-;124;72                                                                      | 28ZPAK-;90;72                                                                       |

### Model Applicability

Unknown features are fingerprint features in the query molecule, but not found in the training set.

1. All properties and OPS components are within expected ranges.

### Feature Contribution

#### Top features for positive contribution

| Fingerprint | Bit/Smiles | Feature Structure                                                                                                                       | Score | Irritant in training set |
|-------------|------------|-----------------------------------------------------------------------------------------------------------------------------------------|-------|--------------------------|
| FCFP_12     | 1175665944 | 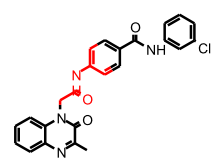<br><chem>[*]CC(=O)N(c1c([cH]1[*])[cH]1[*])</chem> | 0.198 | 14 out of 14             |

|                                               |                   |                                                                                                                                                |              |                                 |
|-----------------------------------------------|-------------------|------------------------------------------------------------------------------------------------------------------------------------------------|--------------|---------------------------------|
| FCFP_12                                       | -770645118        | 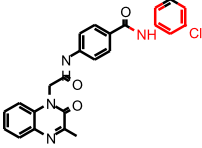<br>[*]N[c]1:[cH]:[*]:[cH]<br>:[c](Cl):[cH]:1               | 0.184        | 7 out of 7                      |
| FCFP_12                                       | -745491832        | <br>[*][c]1:[*]:[cH]:[cH]<br>:[c](Cl):[cH]:1                | 0.177        | 32 out of 33                    |
| <b>Top Features for negative contribution</b> |                   |                                                                                                                                                |              |                                 |
| <b>Fingerprint</b>                            | <b>Bit/Smiles</b> | <b>Feature Structure</b>                                                                                                                       | <b>Score</b> | <b>Irritant in training set</b> |
| FCFP_12                                       | 580453787         | <br>[*]C(=N[c](:[*]):[*])<br>[*]                            | -0.132       | 2 out of 3                      |
| FCFP_12                                       | 565998553         | <br>[*]N([*])C(=O)C(=[*])<br>[*]                           | -0.066       | 198 out of 262                  |
| FCFP_12                                       | -792685140        | <br>[*]C(=[*])N[c]1:[cH]:<br>[cH]:[cH]:[c]([*]):<br>cH]:1 | 0.000        | 5 out of 6                      |

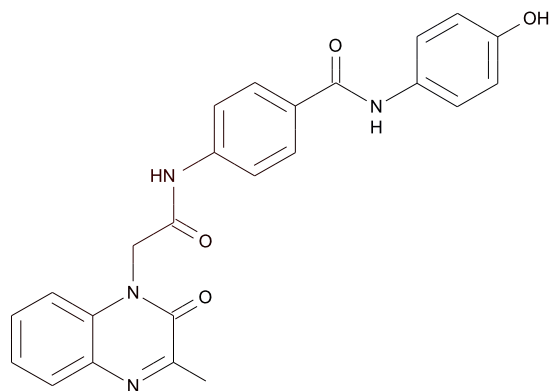
 $C_{24}H_{20}N_4O_4$ 

Molecular Weight: 428.44

ALogP: 2.218

Rotatable Bonds: 5

Acceptors: 5

Donors: 3

## Model Prediction

**Prediction: Irritant**

Probability: 1.000

Enrichment: 1.176

Bayesian Score: 1.646

Mahalanobis Distance: 9.030

Mahalanobis Distance p-value: 0.495

Prediction: Positive if the Bayesian score is above the estimated best cutoff value from minimizing the false positive and false negative rate.

Probability: The estimated probability that the sample is in the positive category. This assumes that the Bayesian score follows a normal distribution and is different from the prediction using a cutoff.

Enrichment: An estimate of enrichment, that is, the increased likelihood (versus random) of this sample being in the category.

Bayesian Score: The standard Laplacian-modified Bayesian score.

Mahalanobis Distance: The Mahalanobis distance (MD) is the distance to the center of the training data. The larger the MD, the less trustworthy the prediction.

Mahalanobis Distance p-value: The p-value gives the fraction of training data with an MD greater than or equal to the one for the given sample, assuming normally distributed data. The smaller the p-value, the less trustworthy the prediction. For highly non-normal X properties (e.g., fingerprints), the MD p-value is wildly inaccurate.

## Structural Similar Compounds

| Name               | ANTHRAQUINONE; 1-((2-HYDROXYETHYL)AMINO)-4-(METHYLAMINO)- | Disperse Black 9                    | 4;4'-DIAMINO-1;1'-DIANTHRIMIDE |
|--------------------|-----------------------------------------------------------|-------------------------------------|--------------------------------|
| Structure          |                                                           |                                     |                                |
| Actual Endpoint    | Irritant                                                  | Non-Irritant                        | Irritant                       |
| Predicted Endpoint | Irritant                                                  | Non-Irritant                        | Irritant                       |
| Distance           | 0.675                                                     | 0.699                               | 0.719                          |
| Reference          | 28ZPAK 245;72                                             | J. Am. Coll. Toxicol. 5(3):205;1986 | 28ZPAK-;125;72                 |

## Model Applicability

Unknown features are fingerprint features in the query molecule, but not found in the training set.

1. All properties and OPS components are within expected ranges.

## Feature Contribution

### Top features for positive contribution

| Fingerprint | Bit/Smiles | Feature Structure | Score | Irritant in training set |
|-------------|------------|-------------------|-------|--------------------------|
| FCFP_12     | 1175665944 |                   | 0.198 | 14 out of 14             |

|                                               |                   |                                                                                                                                                        |              |                                 |
|-----------------------------------------------|-------------------|--------------------------------------------------------------------------------------------------------------------------------------------------------|--------------|---------------------------------|
| FCFP_12                                       | 566058135         | 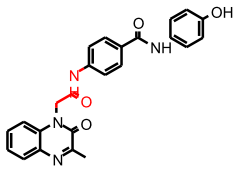<br><chem>[*]CC(=O)N[*]</chem>                                      | 0.163        | 23 out of 24                    |
| FCFP_12                                       | -1838187238       | <br><chem>[*]C(=[*])N[c]1:[cH]:[cH]:[*]:[cH]:[*]:[cH]:[cH]:1</chem> | 0.147        | 17 out of 18                    |
| <b>Top Features for negative contribution</b> |                   |                                                                                                                                                        |              |                                 |
| <b>Fingerprint</b>                            | <b>Bit/Smiles</b> | <b>Feature Structure</b>                                                                                                                               | <b>Score</b> | <b>Irritant in training set</b> |
| FCFP_12                                       | 580453787         | <br><chem>[*]C(=N[c](:[*]):[*])</chem><br><chem>[*]</chem>          | -0.132       | 2 out of 3                      |
| FCFP_12                                       | -1849978862       | <br><chem>[*]N[c]1:[cH]:[cH]:[c](O):[cH]:[cH]:1</chem>            | -0.132       | 2 out of 3                      |
| FCFP_12                                       | 565998553         | <br><chem>[*]N([*])C(=O)C(=[*])</chem><br><chem>[*]</chem>        | -0.066       | 198 out of 262                  |

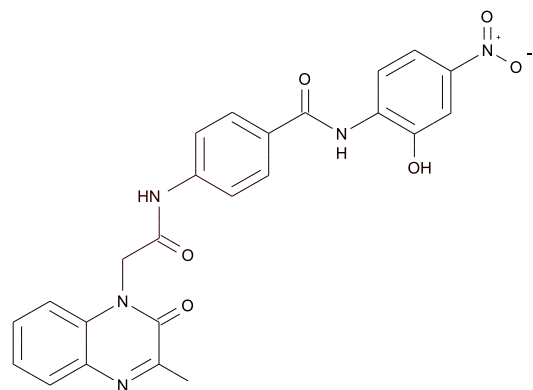

$C_{24}H_{19}N_5O_6$

Molecular Weight: 473.43756

ALogP: 2.113

Rotatable Bonds: 6

Acceptors: 7

Donors: 3

## Model Prediction

**Prediction: Irritant**

Probability: 1.000

Enrichment: 1.176

Bayesian Score: 2.016

Mahalanobis Distance: 8.881

Mahalanobis Distance p-value: 0.576

Prediction: Positive if the Bayesian score is above the estimated best cutoff value from minimizing the false positive and false negative rate.

Probability: The estimated probability that the sample is in the positive category. This assumes that the Bayesian score follows a normal distribution and is different from the prediction using a cutoff.

Enrichment: An estimate of enrichment, that is, the increased likelihood (versus random) of this sample being in the category.

Bayesian Score: The standard Laplacian-modified Bayesian score.

Mahalanobis Distance: The Mahalanobis distance (MD) is the distance to the center of the training data. The larger the MD, the less trustworthy the prediction.

Mahalanobis Distance p-value: The p-value gives the fraction of training data with an MD greater than or equal to the one for the given sample, assuming normally distributed data. The smaller the p-value, the less trustworthy the prediction. For highly non-normal X properties (e.g., fingerprints), the MD p-value is wildly inaccurate.

## Structural Similar Compounds

| Name               | 4;4'-DIAMINO-1;1'-DIANTHRIMIDE | ANTHRAQUINONE; 1;5-DIAMINO-4;8-DIHYDROXY-3-(p-METHOXYPHENYL)- | Disperse Black 9                    |
|--------------------|--------------------------------|---------------------------------------------------------------|-------------------------------------|
| Structure          |                                |                                                               |                                     |
| Actual Endpoint    | Irritant                       | Irritant                                                      | Non-Irritant                        |
| Predicted Endpoint | Irritant                       | Irritant                                                      | Non-Irritant                        |
| Distance           | 0.654                          | 0.762                                                         | 0.773                               |
| Reference          | 28ZPAK-;125;72                 | 28ZPAK 245;72                                                 | J. Am. Coll. Toxicol. 5(3):205;1986 |

## Model Applicability

Unknown features are fingerprint features in the query molecule, but not found in the training set.

- All properties and OPS components are within expected ranges.
- Unknown FCFP\_2 feature: -828984032: [\*][N+](=[\*])[c](:c:[\*]):c:[\*]
- Unknown FCFP\_2 feature: -1338588315: [\*]:[c](:[\*])[N+](=O)[O-]
- Unknown FCFP\_2 feature: 1872392852: [\*][N+](=O)[\*]
- Unknown FCFP\_2 feature: 260476081: [\*][N+](=[\*])[O-]

## Feature Contribution

### Top features for positive contribution

| Fingerprint | Bit/Smiles | Feature Structure                      | Score | Irritant in training set |
|-------------|------------|----------------------------------------|-------|--------------------------|
| FCFP_12     | 1175665944 | <br>[*]CC(=O)N(c)[:]cH:]<br>[*]cH:][*] | 0.198 | 14 out of 14             |



| FCFP_12                                | 566058135   | 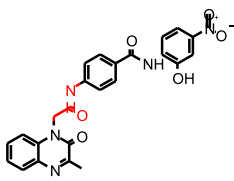<br><chem>[*]CC(=O)N[*]</chem>                               | 0.163  | 23 out of 24             |
|----------------------------------------|-------------|-------------------------------------------------------------------------------------------------------------------------------------------------|--------|--------------------------|
| FCFP_12                                | -1924607822 | <br><chem>[*]N[c]1:[cH]:[*]:[c]<br/>([*]):[cH]:[c]:1O</chem> | 0.156  | 3 out of 3               |
| Top Features for negative contribution |             |                                                                                                                                                 |        |                          |
| Fingerprint                            | Bit/Smiles  | Feature Structure                                                                                                                               | Score  | Irritant in training set |
| FCFP_12                                | 580453787   | <br><chem>[*]C(=N[c](:[*]):[*])<br/>[*]</chem>               | -0.132 | 2 out of 3               |
| FCFP_12                                | 565998553   | <br><chem>[*]N([*])C(=O)C(=[*])<br/>[*]</chem>             | -0.066 | 198 out of 262           |
| FCFP_12                                | 8           | <br><chem>[*][N+](=[*])[*]</chem>                          | -0.056 | 3 out of 4               |

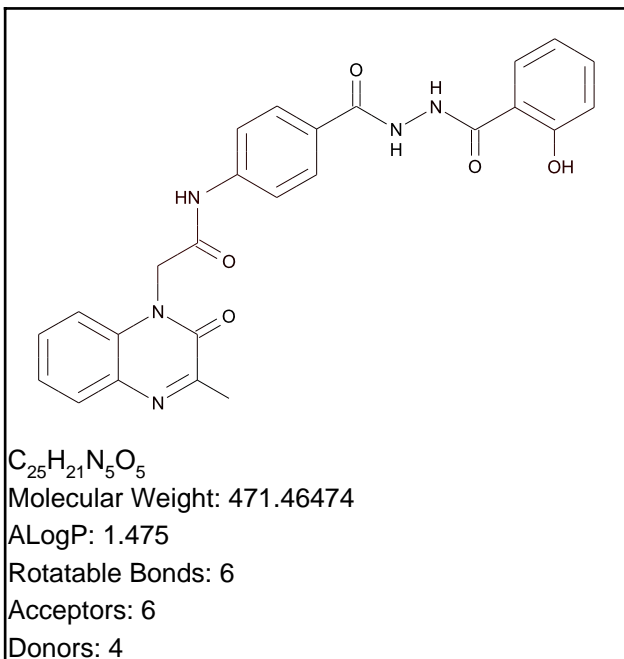

### Model Prediction

Prediction: Irritant

Probability: 1.000

Enrichment: 1.176

Bayesian Score: 2.145

Mahalanobis Distance: 10.269

Mahalanobis Distance p-value: 0.0474

Prediction: Positive if the Bayesian score is above the estimated best cutoff value from minimizing the false positive and false negative rate.

Probability: The estimated probability that the sample is in the positive category. This assumes that the Bayesian score follows a normal distribution and is different from the prediction using a cutoff.

Enrichment: An estimate of enrichment, that is, the increased likelihood (versus random) of this sample being in the category.

Bayesian Score: The standard Laplacian-modified Bayesian score.

Mahalanobis Distance: The Mahalanobis distance (MD) is the distance to the center of the training data. The larger the MD, the less trustworthy the prediction.

Mahalanobis Distance p-value: The p-value gives the fraction of training data with an MD greater than or equal to the one for the given sample, assuming normally distributed data. The smaller the p-value, the less trustworthy the prediction. For highly non-normal X properties (e.g., fingerprints), the MD p-value is wildly inaccurate.

### Structural Similar Compounds

| Name               | ANTHRAQUINONE; 1;5-DIAMINO-4;8-DIHYDROXY-3-(p-METHOXYPHENYL)-                       | 4;4'-DIAMINO-1;1'-DIANTHRIMIDE                                                      | Disperse Black 9                                                                    |
|--------------------|-------------------------------------------------------------------------------------|-------------------------------------------------------------------------------------|-------------------------------------------------------------------------------------|
| Structure          | 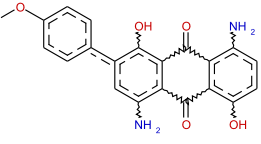 |  |  |
| Actual Endpoint    | Irritant                                                                            | Irritant                                                                            | Non-Irritant                                                                        |
| Predicted Endpoint | Irritant                                                                            | Irritant                                                                            | Non-Irritant                                                                        |
| Distance           | 0.694                                                                               | 0.798                                                                               | 0.838                                                                               |
| Reference          | 28ZPAK 245;72                                                                       | 28ZPAK-;125;72                                                                      | J. Am. Coll. Toxicol. 5(3):205;1986                                                 |

### Model Applicability

Unknown features are fingerprint features in the query molecule, but not found in the training set.

- All properties and OPS components are within expected ranges.
- Unknown FCFP\_2 feature: -885461129: [\*]NNC(=[\*])[\*]

### Feature Contribution

#### Top features for positive contribution

| Fingerprint | Bit/Smiles | Feature Structure                                                                                                           | Score | Irritant in training set |
|-------------|------------|-----------------------------------------------------------------------------------------------------------------------------|-------|--------------------------|
| FCFP_12     | 1175665944 | 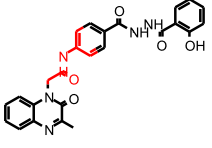<br>[*]CC(=O)N(c)[:,[cH]:[*]],[cH]:[*] | 0.198 | 14 out of 14             |

|                                               |                   |                                                                                                                                         |              |                                 |
|-----------------------------------------------|-------------------|-----------------------------------------------------------------------------------------------------------------------------------------|--------------|---------------------------------|
| FCFP_12                                       | 566058135         | 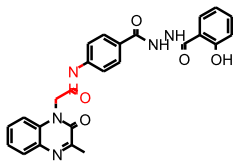<br>[*]CC(=O)N[*]                                    | 0.163        | 23 out of 24                    |
| FCFP_12                                       | -1838187238       | <br>[*]C(=*)N[c]1:[cH]:[cH]:[*]:[cH]:[cH]:[cH]:1     | 0.147        | 17 out of 18                    |
| <b>Top Features for negative contribution</b> |                   |                                                                                                                                         |              |                                 |
| <b>Fingerprint</b>                            | <b>Bit/Smiles</b> | <b>Feature Structure</b>                                                                                                                | <b>Score</b> | <b>Irritant in training set</b> |
| FCFP_12                                       | 580453787         | <br>[*]C(=N[c](:[*]):[*])<br>[*]                     | -0.132       | 2 out of 3                      |
| FCFP_12                                       | -1698724694       | <br>[*]C(=*)[c]1:[cH]:[cH]:[cH]:[cH]:[cH]:[cH]:1[*] | -0.096       | 107 out of 146                  |
| FCFP_12                                       | 565998553         | <br>[*]N[*]C(=O)C(=*)<br>[*]                       | -0.066       | 198 out of 262                  |

# Sorafenib

# TOPKAT\_Ocular\_Irritancy\_None\_vs\_Irritant

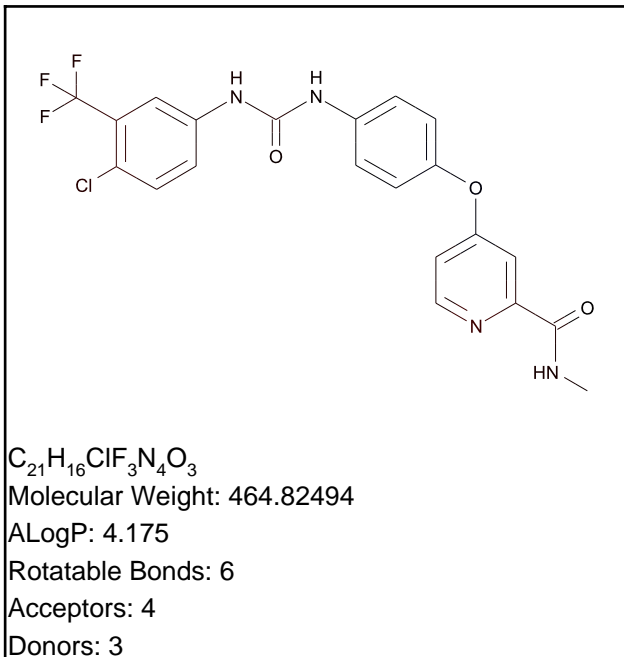

## Model Prediction

Prediction: Irritant

Probability: 1.000

Enrichment: 1.176

Bayesian Score: 3.039

Mahalanobis Distance: 6.281

Mahalanobis Distance p-value: 1

Prediction: Positive if the Bayesian score is above the estimated best cutoff value from minimizing the false positive and false negative rate.

Probability: The estimated probability that the sample is in the positive category. This assumes that the Bayesian score follows a normal distribution and is different from the prediction using a cutoff.

Enrichment: An estimate of enrichment, that is, the increased likelihood (versus random) of this sample being in the category.

Bayesian Score: The standard Laplacian-modified Bayesian score.

Mahalanobis Distance: The Mahalanobis distance (MD) is the distance to the center of the training data. The larger the MD, the less trustworthy the prediction.

Mahalanobis Distance p-value: The p-value gives the fraction of training data with an MD greater than or equal to the one for the given sample, assuming normally distributed data. The smaller the p-value, the less trustworthy the prediction. For highly non-normal X properties (e.g., fingerprints), the MD p-value is wildly inaccurate.

## Structural Similar Compounds

| Name               | BENZANILIDE;2';2'''-DITHIOBIS-                                                      | 4;4'-DIAMINO-1;1'-DIANTHRIMIDE                                                      | 5-NORBORNENE-2;3-DICARBOXYLIC ACID;1;4;5;6;7;7-HEXACHLORO-                          |
|--------------------|-------------------------------------------------------------------------------------|-------------------------------------------------------------------------------------|-------------------------------------------------------------------------------------|
| Structure          | 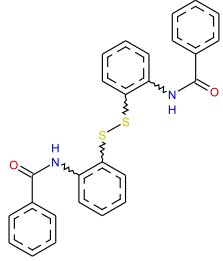 |  |  |
| Actual Endpoint    | Non-Irritant                                                                        | Irritant                                                                            | Irritant                                                                            |
| Predicted Endpoint | Non-Irritant                                                                        | Irritant                                                                            | Irritant                                                                            |
| Distance           | 0.743                                                                               | 0.791                                                                               | 0.801                                                                               |
| Reference          | 28ZPAK-;173;72                                                                      | 28ZPAK-;125;72                                                                      | 28ZPAK-;92;72                                                                       |

## Model Applicability

Unknown features are fingerprint features in the query molecule, but not found in the training set.

- All properties and OPS components are within expected ranges.

## Feature Contribution

### Top features for positive contribution

| Fingerprint | Bit/Smiles | Feature Structure                                                                                                                  | Score | Irritant in training set |
|-------------|------------|------------------------------------------------------------------------------------------------------------------------------------|-------|--------------------------|
| FCFP_12     | 1747237384 | 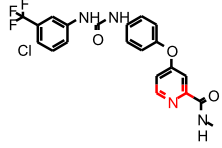<br><chem>[*][c](:[*]):n:[c](:[*]):[*]</chem> | 0.208 | 44 out of 44             |

|                                               |                   |                                                                                                                                                                            |              |                                 |
|-----------------------------------------------|-------------------|----------------------------------------------------------------------------------------------------------------------------------------------------------------------------|--------------|---------------------------------|
| FCFP_12                                       | -124655670        | 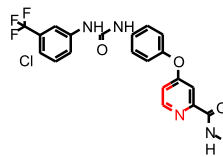<br>[*]:[cH]:[cH]:n:[*]                                                                 | 0.200        | 16 out of 16                    |
| FCFP_12                                       | -1539132615       | <br>[*][c](:[*]):[c](C):n<br>:[*]                                                       | 0.197        | 13 out of 13                    |
| <b>Top Features for negative contribution</b> |                   |                                                                                                                                                                            |              |                                 |
| <b>Fingerprint</b>                            | <b>Bit/Smiles</b> | <b>Feature Structure</b>                                                                                                                                                   | <b>Score</b> | <b>Irritant in training set</b> |
| FCFP_12                                       | -747629521        | <br>[*]N[c]1:[cH]:[cH]:[c<br>)O[c](:[*]):[*]):[c<br>H]:[cH]:1                           | -0.268       | 1 out of 2                      |
| FCFP_12                                       | 702861189         | <br>[*]N[c]1:[cH]:[cH]:[c<br>)O[c]2:[cH]:[cH]:[*<br>]:[c]([*]):[cH]:2):[<br>cH]:[cH]:1 | -0.268       | 1 out of 2                      |
| FCFP_12                                       | -215363676        | <br>[*][c]1:[*]:[cH]:[cH]<br>:[c](O[c]2:[cH]:[cH]<br>:[*]:[cH]:[cH]:2):[c<br>H]:1     | 0.000        | 4 out of 5                      |

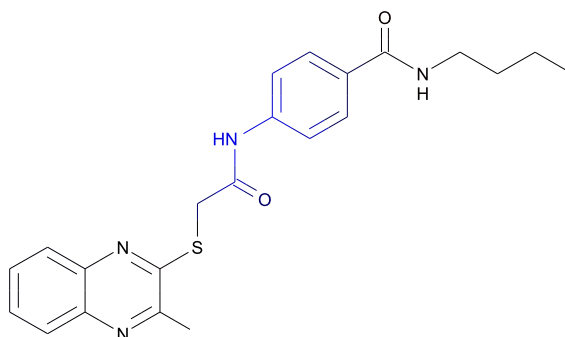

$C_{22}H_{24}N_4O_2S$

Molecular Weight: 408.51656

ALogP: 3.83

Rotatable Bonds: 8

Acceptors: 5

Donors: 2

## Model Prediction

Prediction: Non-Irritant

Probability: 0.352

Enrichment: 0.382

Bayesian Score: -4.947

Mahalanobis Distance: 9.995

Mahalanobis Distance p-value: 0.0635

Prediction: Positive if the Bayesian score is above the estimated best cutoff value from minimizing the false positive and false negative rate.

Probability: The estimated probability that the sample is in the positive category. This assumes that the Bayesian score follows a normal distribution and is different from the prediction using a cutoff.

Enrichment: An estimate of enrichment, that is, the increased likelihood (versus random) of this sample being in the category. Bayesian Score: The standard Laplacian-modified Bayesian score.

Mahalanobis Distance: The Mahalanobis distance (MD) is the distance to the center of the training data. The larger the MD, the less trustworthy the prediction.

Mahalanobis Distance p-value: The p-value gives the fraction of training data with an MD greater than or equal to the one for the given sample, assuming normally distributed data. The smaller the p-value, the less trustworthy the prediction. For highly non-normal X properties (e.g., fingerprints), the MD p-value is wildly inaccurate.

## Structural Similar Compounds

| Name               | Benzenesulfonic acid, 2,2'-(4,4'-biphenylylene)d i-, disodium salt                                        | Pregna-1,4-diene-3,20-dione, 21-(acetyloxy)-11-hydroxy-6-methyl-17-(1-oxopropoxy)-, (6- $\alpha$ ,11- $\beta$ )-                                                                 | 2-Anthracenesulfonic acid, 1-amino-9,10-dihydro-9,10-dioxo-4-(2,4,6-trimethylanilino)-, monosodium salt                                            |
|--------------------|-----------------------------------------------------------------------------------------------------------|----------------------------------------------------------------------------------------------------------------------------------------------------------------------------------|----------------------------------------------------------------------------------------------------------------------------------------------------|
| Structure          |                                                                                                           |                                                                                                                                                                                  |                                                                                                                                                    |
| Actual Endpoint    | Irritant                                                                                                  | Irritant                                                                                                                                                                         | Irritant                                                                                                                                           |
| Predicted Endpoint | Non-Irritant                                                                                              | Irritant                                                                                                                                                                         | Non-Irritant                                                                                                                                       |
| Distance           | 0.801                                                                                                     | 0.815                                                                                                                                                                            | 0.849                                                                                                                                              |
| Reference          | MVCRB3 MVC-Report. (Stockholm, Sweden) No.1-2, 1972-73. Discontinued. Volume(issue)/page/year: 2,193,1973 | YACHDS Yakuri to Chiryō. Pharmacology and Therapeutics. (Raifu Saiensu Shup pan K.K., 2-5-13, Yaesu, Chuo-ku, Tokyo 104, Japan) V.1-1972- Volume(issue) /page/year: 19,3103,1991 | 85JCAE "Prehled Prumyslove Toxikologie; Organické Latky," Marhold, J., Prague, Czechoslovakia, Avicenum, 1986 Volume(issue)/page/year: -,1327,1986 |

## Model Applicability

Unknown features are fingerprint features in the query molecule, but not found in the training set.

1. All properties and OPS components are within expected ranges.

## Feature Contribution

### Top features for positive contribution

| Fingerprint | Bit/Smiles | Feature Structure | Score | Irritant in training set |
|-------------|------------|-------------------|-------|--------------------------|
|             |            |                   |       |                          |

|                                               |                   |                                                                                                                                        |              |                                 |
|-----------------------------------------------|-------------------|----------------------------------------------------------------------------------------------------------------------------------------|--------------|---------------------------------|
| FCFP_12                                       | -1539132615       | 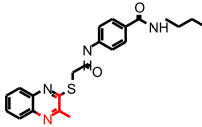<br>[*][c](:[*]):[c](C):n<br>:[*]                   | 0.079        | 9 out of 9                      |
| FCFP_12                                       | -1410049896       | <br>[*]S[c](:n:[*]):[c](<br>[*]):[*]                | 0.073        | 5 out of 5                      |
| FCFP_12                                       | -1549103449       | <br>[*]NC(=O)[c](:[*]):[*]<br>]                     | 0.073        | 5 out of 5                      |
| <b>Top Features for negative contribution</b> |                   |                                                                                                                                        |              |                                 |
| <b>Fingerprint</b>                            | <b>Bit/Smiles</b> | <b>Feature Structure</b>                                                                                                               | <b>Score</b> | <b>Irritant in training set</b> |
| FCFP_12                                       | 1175665944        | <br>[*]CC(=O)N[c](:[cH]:[<br>*]):[cH]:[*]         | -1.020       | 2 out of 8                      |
| FCFP_12                                       | -1838187238       | <br>[*]C(=[*])N[c]1:[cH]:<br>[cH]:[*]:[cH]:[cH]:1 | -0.692       | 5 out of 12                     |

|         |           |                                                                                                                                                                        |        |            |
|---------|-----------|------------------------------------------------------------------------------------------------------------------------------------------------------------------------|--------|------------|
| FCFP_12 | 451043714 | 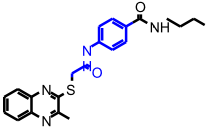 <p data-bbox="1260 259 1396 324">[*]CC(=O)N(c)1:[cH]:[cH]:[c]([*]):[cH]:[cH]:1</p> | -0.650 | 0 out of 1 |
|---------|-----------|------------------------------------------------------------------------------------------------------------------------------------------------------------------------|--------|------------|



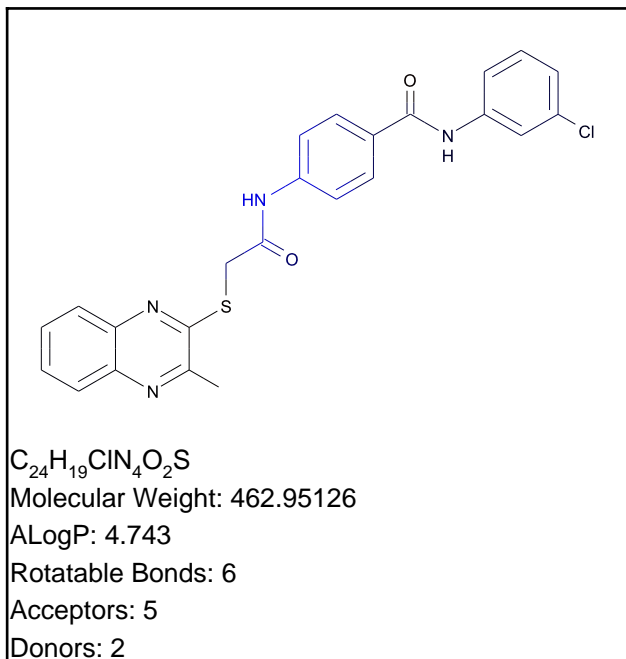

### Model Prediction

Prediction: Non-Irritant

Probability: 0.051

Enrichment: 0.055

Bayesian Score: -6.256

Mahalanobis Distance: 7.401

Mahalanobis Distance p-value: 0.981

Prediction: Positive if the Bayesian score is above the estimated best cutoff value from minimizing the false positive and false negative rate.

Probability: The estimated probability that the sample is in the positive category. This assumes that the Bayesian score follows a normal distribution and is different from the prediction using a cutoff.

Enrichment: An estimate of enrichment, that is, the increased likelihood (versus random) of this sample being in the category. Bayesian Score: The standard Laplacian-modified Bayesian score.

Mahalanobis Distance: The Mahalanobis distance (MD) is the distance to the center of the training data. The larger the MD, the less trustworthy the prediction.

Mahalanobis Distance p-value: The p-value gives the fraction of training data with an MD greater than or equal to the one for the given sample, assuming normally distributed data. The smaller the p-value, the less trustworthy the prediction. For highly non-normal X properties (e.g., fingerprints), the MD p-value is wildly inaccurate.

### Structural Similar Compounds

| Name               | Benzenesulfonic acid, 2,2'-(4,4'-biphenylylene)d i-, disodium salt                                        | Anthraquinone, 1,1'-iminodi-                                                                                                                      | 2-Anthracenesulfonic acid, 1-amino-9,10-dihydro-9,10-dioxo-4-(2,4,6-trimethylanilino)-, monosodium salt                                            |
|--------------------|-----------------------------------------------------------------------------------------------------------|---------------------------------------------------------------------------------------------------------------------------------------------------|----------------------------------------------------------------------------------------------------------------------------------------------------|
| Structure          |                                                                                                           |                                                                                                                                                   |                                                                                                                                                    |
| Actual Endpoint    | Irritant                                                                                                  | Irritant                                                                                                                                          | Irritant                                                                                                                                           |
| Predicted Endpoint | Non-Irritant                                                                                              | Non-Irritant                                                                                                                                      | Non-Irritant                                                                                                                                       |
| Distance           | 0.683                                                                                                     | 0.786                                                                                                                                             | 0.855                                                                                                                                              |
| Reference          | MVCRB3 MVC-Report. (Stockholm, Sweden) No.1-2, 1972-73. Discontinued. Volume(issue)/page/year: 2,193,1973 | 85JCAE "Prehled Prumyslove Toxikologie; Organické Latky," Marhold, J., Prague, Czechoslovakia, Avicenum, 1986 Volume(issue)/page/year: -,735,1986 | 85JCAE "Prehled Prumyslove Toxikologie; Organické Latky," Marhold, J., Prague, Czechoslovakia, Avicenum, 1986 Volume(issue)/page/year: -,1327,1986 |

### Model Applicability

Unknown features are fingerprint features in the query molecule, but not found in the training set.

1. All properties and OPS components are within expected ranges.

### Feature Contribution

#### Top features for positive contribution

| Fingerprint | Bit/Smiles | Feature Structure | Score | Irritant in training set |
|-------------|------------|-------------------|-------|--------------------------|
|             |            |                   |       |                          |

| FCFP_12                                | -1539132615 | 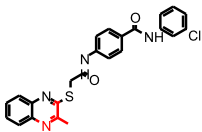<br><chem>[*][c](:[*]):[c](C):n</chem><br><chem>:[*]</chem>                   | 0.079  | 9 out of 9               |
|----------------------------------------|-------------|------------------------------------------------------------------------------------------------------------------------------------------------------------------|--------|--------------------------|
| FCFP_12                                | -1549103449 | <br><chem>[*]NC(=O)[c](:[*]):[*]</chem><br><chem>]</chem>                     | 0.073  | 5 out of 5               |
| FCFP_12                                | -1410049896 | <br><chem>[*]S[c](:n:[*]):[c]([</chem><br><chem>*)]:[*]</chem>                | 0.073  | 5 out of 5               |
| Top Features for negative contribution |             |                                                                                                                                                                  |        |                          |
| Fingerprint                            | Bit/Smiles  | Feature Structure                                                                                                                                                | Score  | Irritant in training set |
| FCFP_12                                | 1175665944  | <br><chem>[*]CC(=O)N[c](:[cH]:[</chem><br><chem>*)]:[cH]:[*]</chem>          | -1.020 | 2 out of 8               |
| FCFP_12                                | -1838187238 | <br><chem>[*]C(=[*])N[c]1:[cH]:</chem><br><chem>[cH]:[*]:[cH]:[cH]:1</chem> | -0.692 | 5 out of 12              |

|         |           |                                                                                                                                                   |        |            |
|---------|-----------|---------------------------------------------------------------------------------------------------------------------------------------------------|--------|------------|
| FCFP_12 | 451043714 | 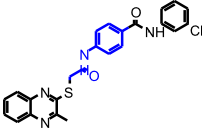<br><chem>[*]CC(=O)N(c)1:[cH]:[cH]:[c]([*]):[cH]:[cH]:1</chem> | -0.650 | 0 out of 1 |
|---------|-----------|---------------------------------------------------------------------------------------------------------------------------------------------------|--------|------------|

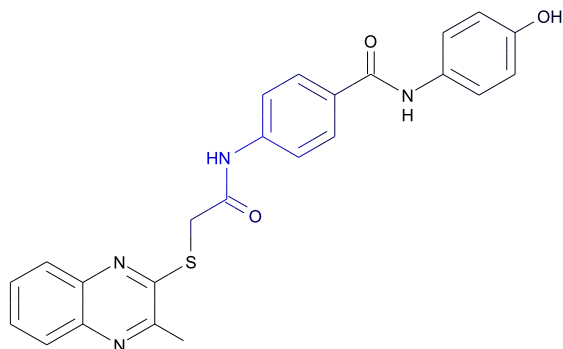
 $C_{24}H_{20}N_4O_3S$ 

Molecular Weight: 444.5056

ALogP: 3.836

Rotatable Bonds: 6

Acceptors: 6

Donors: 3

## Model Prediction

Prediction: Non-Irritant

Probability: 0.128

Enrichment: 0.139

Bayesian Score: -5.715

Mahalanobis Distance: 8.326

Mahalanobis Distance p-value: 0.768

Prediction: Positive if the Bayesian score is above the estimated best cutoff value from minimizing the false positive and false negative rate.

Probability: The estimated probability that the sample is in the positive category. This assumes that the Bayesian score follows a normal distribution and is different from the prediction using a cutoff.

Enrichment: An estimate of enrichment, that is, the increased likelihood (versus random) of this sample being in the category. Bayesian Score: The standard Laplacian-modified Bayesian score.

Mahalanobis Distance: The Mahalanobis distance (MD) is the distance to the center of the training data. The larger the MD, the less trustworthy the prediction.

Mahalanobis Distance p-value: The p-value gives the fraction of training data with an MD greater than or equal to the one for the given sample, assuming normally distributed data. The smaller the p-value, the less trustworthy the prediction. For highly non-normal X properties (e.g., fingerprints), the MD p-value is wildly inaccurate.

## Structural Similar Compounds

| Name               | 2-Anthracenesulfonic acid, 1-amino-9,10-dihydro-9,10-dioxo-4-(2,4,6-trimethylanilino)-, monosodium salt                                            | Benzenesulfonic acid, 2,2'-(4,4'-biphenylylene)divinyl-, disodium salt                                    | Urea, 1,3-bis(2-benzothiazolythiomethyl)-                                                                                                                                      |
|--------------------|----------------------------------------------------------------------------------------------------------------------------------------------------|-----------------------------------------------------------------------------------------------------------|--------------------------------------------------------------------------------------------------------------------------------------------------------------------------------|
| Structure          |                                                                                                                                                    |                                                                                                           |                                                                                                                                                                                |
| Actual Endpoint    | Irritant                                                                                                                                           | Irritant                                                                                                  | Irritant                                                                                                                                                                       |
| Predicted Endpoint | Non-Irritant                                                                                                                                       | Non-Irritant                                                                                              | Irritant                                                                                                                                                                       |
| Distance           | 0.777                                                                                                                                              | 0.799                                                                                                     | 0.845                                                                                                                                                                          |
| Reference          | 85JCAE "Prehled Prumyslove Toxikologie; Organicke Latky," Marhold, J., Prague, Czechoslovakia, Avicenum, 1986 Volume(issue)/page/year: -,1327,1986 | MVCRB3 MVC-Report. (Stockholm, Sweden) No.1-2, 1972-73. Discontinued. Volume(issue)/page/year: 2,193,1973 | AMIHBC AMA Archives of Industrial Hygiene and Occupational Medicine. (Chicago, IL) V.2-10, 1950-54. For publisher information, see AEHLAU. Volume(issue)/page/year: 5,311,1952 |

## Model Applicability

Unknown features are fingerprint features in the query molecule, but not found in the training set.

1. All properties and OPS components are within expected ranges.

## Feature Contribution

### Top features for positive contribution

| Fingerprint | Bit/Smiles | Feature Structure | Score | Irritant in training set |
|-------------|------------|-------------------|-------|--------------------------|
|             |            |                   |       |                          |

|                                               |                   |                                                                                                                                        |              |                                 |
|-----------------------------------------------|-------------------|----------------------------------------------------------------------------------------------------------------------------------------|--------------|---------------------------------|
| FCFP_12                                       | -1539132615       | 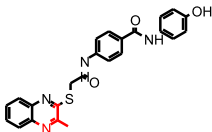<br>[*][c](:[*]):[c](C):n<br>:[*]                   | 0.079        | 9 out of 9                      |
| FCFP_12                                       | -1549103449       | <br>[*]NC(=O)[c](:[*]):[*]<br>]                     | 0.073        | 5 out of 5                      |
| FCFP_12                                       | -1410049896       | <br>[*]S[c](:n:[*]):[c]([<br>*]):[*]                | 0.073        | 5 out of 5                      |
| <b>Top Features for negative contribution</b> |                   |                                                                                                                                        |              |                                 |
| <b>Fingerprint</b>                            | <b>Bit/Smiles</b> | <b>Feature Structure</b>                                                                                                               | <b>Score</b> | <b>Irritant in training set</b> |
| FCFP_12                                       | 1175665944        | <br>[*]CC(=O)N[c]([cH]:[<br>*]):[cH]:[*]          | -1.020       | 2 out of 8                      |
| FCFP_12                                       | -1838187238       | <br>[*]C(=[*])N[c]1:[cH]:<br>[cH]:[*]:[cH]:[cH]:1 | -0.692       | 5 out of 12                     |

FCFP\_12

451043714

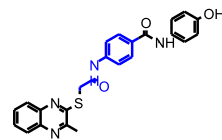

-0.650

0 out of 1

[\*]CC(=O)N(c)1:[cH]:[  
cH]:[c]([\*]):[cH]:[c  
H]:1

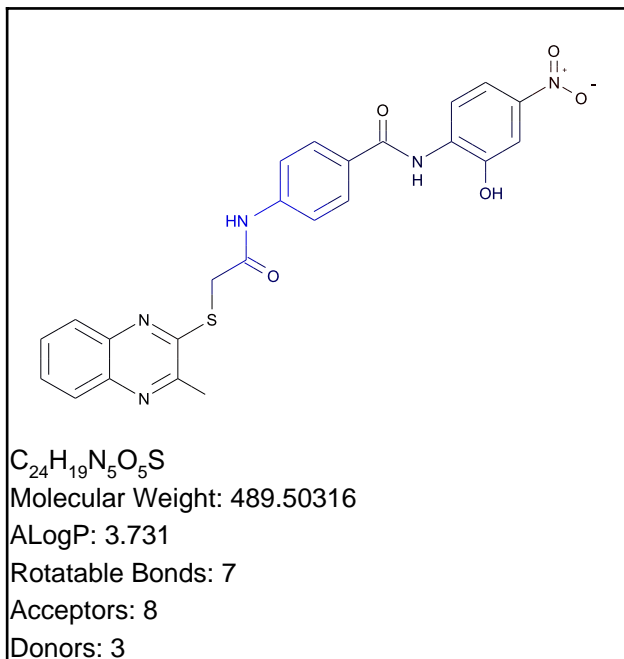

## Model Prediction

Prediction: Non-Irritant

Probability: 0.098

Enrichment: 0.106

Bayesian Score: -5.883

Mahalanobis Distance: 9.348

Mahalanobis Distance p-value: 0.251

Prediction: Positive if the Bayesian score is above the estimated best cutoff value from minimizing the false positive and false negative rate.

Probability: The estimated probability that the sample is in the positive category. This assumes that the Bayesian score follows a normal distribution and is different from the prediction using a cutoff.

Enrichment: An estimate of enrichment, that is, the increased likelihood (versus random) of this sample being in the category.

Bayesian Score: The standard Laplacian-modified Bayesian score.

Mahalanobis Distance: The Mahalanobis distance (MD) is the distance to the center of the training data. The larger the MD, the less trustworthy the prediction.

Mahalanobis Distance p-value: The p-value gives the fraction of training data with an MD greater than or equal to the one for the given sample, assuming normally distributed data. The smaller the p-value, the less trustworthy the prediction. For highly non-normal X properties (e.g., fingerprints), the MD p-value is wildly inaccurate.

## Structural Similar Compounds

| Name               | 2,2'-Stilbenedisulfonic acid, 4,4'-dinitro-                                                                                                        | 2-Anthracenesulfonic acid, 1-amino-9,10-dihydro-9,10-dioxo-4-(2,4,6-trimethylanilino)-, monosodium salt                                            | Urea, 1,3-bis(2-benzothiazolythiomethyl)-                                                                                                                                      |
|--------------------|----------------------------------------------------------------------------------------------------------------------------------------------------|----------------------------------------------------------------------------------------------------------------------------------------------------|--------------------------------------------------------------------------------------------------------------------------------------------------------------------------------|
| Structure          |                                                                                                                                                    |                                                                                                                                                    |                                                                                                                                                                                |
| Actual Endpoint    | Irritant                                                                                                                                           | Irritant                                                                                                                                           | Irritant                                                                                                                                                                       |
| Predicted Endpoint | Irritant                                                                                                                                           | Non-Irritant                                                                                                                                       | Irritant                                                                                                                                                                       |
| Distance           | 0.806                                                                                                                                              | 0.864                                                                                                                                              | 0.868                                                                                                                                                                          |
| Reference          | 85JCAE "Prehled Prumyslove Toxikologie; Organické Latky," Marhold, J., Prague, Czechoslovakia, Avicenum, 1986 Volume(issue)/page/year: -,1062,1986 | 85JCAE "Prehled Prumyslove Toxikologie; Organické Latky," Marhold, J., Prague, Czechoslovakia, Avicenum, 1986 Volume(issue)/page/year: -,1327,1986 | AMIHBC AMA Archives of Industrial Hygiene and Occupational Medicine. (Chicago, IL) V.2-10, 1950-54. For publisher information, see AEHLAU. Volume(issue)/page/year: 5,311,1952 |

## Model Applicability

Unknown features are fingerprint features in the query molecule, but not found in the training set.

1. All properties and OPS components are within expected ranges.

## Feature Contribution

### Top features for positive contribution

| Fingerprint | Bit/Smiles | Feature Structure | Score | Irritant in training set |
|-------------|------------|-------------------|-------|--------------------------|
|             |            |                   |       |                          |

|                                               |                   |                                                                                                                                    |              |                                 |
|-----------------------------------------------|-------------------|------------------------------------------------------------------------------------------------------------------------------------|--------------|---------------------------------|
| FCFP_12                                       | 5                 | 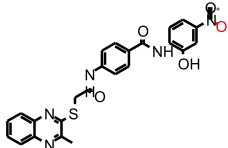<br>[*][O-]                                     | 0.085        | 27 out of 27                    |
| FCFP_12                                       | 8                 | <br>[*][N+](=[*])[*]                            | 0.084        | 20 out of 20                    |
| FCFP_12                                       | -828984032        | <br>[*][N+](=[*])[c]([cH];[*]):[cH]:[*]         | 0.079        | 9 out of 9                      |
| <b>Top Features for negative contribution</b> |                   |                                                                                                                                    |              |                                 |
| <b>Fingerprint</b>                            | <b>Bit/Smiles</b> | <b>Feature Structure</b>                                                                                                           | <b>Score</b> | <b>Irritant in training set</b> |
| FCFP_12                                       | 1175665944        | <br>[*]CC(=O)N(c]([cH];[*]):[cH]:[*]           | -1.020       | 2 out of 8                      |
| FCFP_12                                       | -1838187238       | <br>[*]C(=[*])N(c]1:[cH];[cH]:[*]:[cH]:[cH]:1 | -0.692       | 5 out of 12                     |



|         |             |                                                                                                                                      |        |            |
|---------|-------------|--------------------------------------------------------------------------------------------------------------------------------------|--------|------------|
| FCFP_12 | -1883332927 | 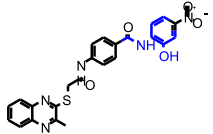<br><chem>*C(=*)N[c]1:[cH]:[cH]:[cH]:[c]1O</chem> | -0.650 | 0 out of 1 |
|---------|-------------|--------------------------------------------------------------------------------------------------------------------------------------|--------|------------|

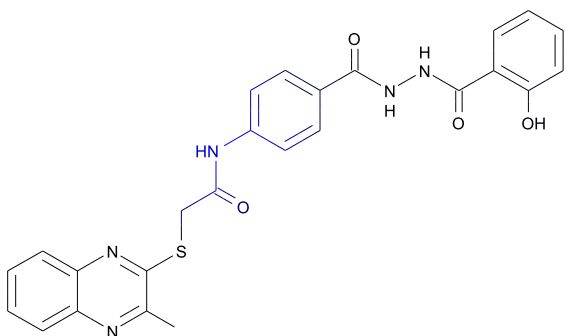

$C_{25}H_{21}N_5O_4S$

Molecular Weight: 487.53034

ALogP: 3.093

Rotatable Bonds: 7

Acceptors: 7

Donors: 4

## Model Prediction

Prediction: Non-Irritant

Probability: 0.204

Enrichment: 0.222

Bayesian Score: -5.394

Mahalanobis Distance: 9.072

Mahalanobis Distance p-value: 0.383

Prediction: Positive if the Bayesian score is above the estimated best cutoff value from minimizing the false positive and false negative rate.

Probability: The estimated probability that the sample is in the positive category. This assumes that the Bayesian score follows a normal distribution and is different from the prediction using a cutoff.

Enrichment: An estimate of enrichment, that is, the increased likelihood (versus random) of this sample being in the category.

Bayesian Score: The standard Laplacian-modified Bayesian score.

Mahalanobis Distance: The Mahalanobis distance (MD) is the distance to the center of the training data. The larger the MD, the less trustworthy the prediction.

Mahalanobis Distance p-value: The p-value gives the fraction of training data with an MD greater than or equal to the one for the given sample, assuming normally distributed data. The smaller the p-value, the less trustworthy the prediction. For highly non-normal X properties (e.g., fingerprints), the MD p-value is wildly inaccurate.

## Structural Similar Compounds

| Name               | 2-Anthracenesulfonic acid, 1-amino-9,10-dihydro-9,10-dioxo-4-(2,4,6-trimethylanilino)-, monosodium salt                                               | Anthraquinone, 2-bromo-1,8-diamino-4,5-dihydroxy-                                                                                                                                                                 | Urea, 1,3-bis(2-benzothiazolythiomethyl)-                                                                                                                                      |
|--------------------|-------------------------------------------------------------------------------------------------------------------------------------------------------|-------------------------------------------------------------------------------------------------------------------------------------------------------------------------------------------------------------------|--------------------------------------------------------------------------------------------------------------------------------------------------------------------------------|
| Structure          |                                                                                                                                                       |                                                                                                                                                                                                                   |                                                                                                                                                                                |
| Actual Endpoint    | Irritant                                                                                                                                              | Irritant                                                                                                                                                                                                          | Irritant                                                                                                                                                                       |
| Predicted Endpoint | Non-Irritant                                                                                                                                          | Non-Irritant                                                                                                                                                                                                      | Irritant                                                                                                                                                                       |
| Distance           | 0.941                                                                                                                                                 | 0.965                                                                                                                                                                                                             | 0.980                                                                                                                                                                          |
| Reference          | 85JCAE "Prehled Prumyslove Toxikologie; Organicke Latky," Marhold, J., Prague, Czechoslovakia, Avicenum, 1986<br>Volume(issue)/page/year: -,1327,1986 | 28ZPAK "Sbornik Vysledku Toxilogickeho Vysetreni Latek A Pripravku," Marhold, J.V., Institut Pro Vychovu Vedoucich Pracovniku Chemickeho Prumyслу Praha, Czechoslovakia, 1972<br>Volume(issue)/page/year: -,244,1 | AMIHBC AMA Archives of Industrial Hygiene and Occupational Medicine. (Chicago, IL) V.2-10, 1950-54. For publisher information, see AEHLAU. Volume(issue)/page/year: 5,311,1952 |

## Model Applicability

Unknown features are fingerprint features in the query molecule, but not found in the training set.

1. All properties and OPS components are within expected ranges.

## Feature Contribution

### Top features for positive contribution

| Fingerprint | Bit/Smiles | Feature Structure | Score | Irritant in training set |
|-------------|------------|-------------------|-------|--------------------------|
|             |            |                   |       |                          |

|                                               |                   |                                                                                                                                                 |              |                                 |
|-----------------------------------------------|-------------------|-------------------------------------------------------------------------------------------------------------------------------------------------|--------------|---------------------------------|
| FCFP_12                                       | -309153329        | 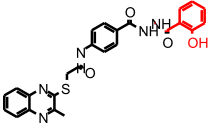<br><chem>[*]C(=[*])[c]1:[cH]:[cH]:[cH]:[cH]:[c]:1O</chem>   | 0.082        | 13 out of 13                    |
| FCFP_12                                       | -1539132615       | <br><chem>[*][c](:[*]):[c](C):n:[*]</chem>                   | 0.079        | 9 out of 9                      |
| FCFP_12                                       | -1549103449       | <br><chem>[*]NC(=O)[c](:[*]):[*]</chem>                      | 0.073        | 5 out of 5                      |
| <b>Top Features for negative contribution</b> |                   |                                                                                                                                                 |              |                                 |
| <b>Fingerprint</b>                            | <b>Bit/Smiles</b> | <b>Feature Structure</b>                                                                                                                        | <b>Score</b> | <b>Irritant in training set</b> |
| FCFP_12                                       | 1175665944        | <br><chem>[*]CC(=O)N[c](:[cH]:[*])[cH]:[*]</chem>          | -1.020       | 2 out of 8                      |
| FCFP_12                                       | -1838187238       | <br><chem>[*]C(=[*])N[c]1:[cH]:[cH]:[*]:[cH]:[cH]:1</chem> | -0.692       | 5 out of 12                     |

|         |           |                                                                                                                                                   |        |            |
|---------|-----------|---------------------------------------------------------------------------------------------------------------------------------------------------|--------|------------|
| FCFP_12 | 451043714 | 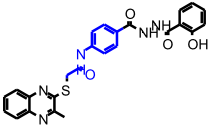<br><chem>[*]CC(=O)N(c1:[cH]:[cH]:[c]([*]):[cH]:[c]H):1</chem> | -0.650 | 0 out of 1 |
|---------|-----------|---------------------------------------------------------------------------------------------------------------------------------------------------|--------|------------|

17a

TOPKAT\_Skin\_Irritancy\_None\_vs\_Irritant

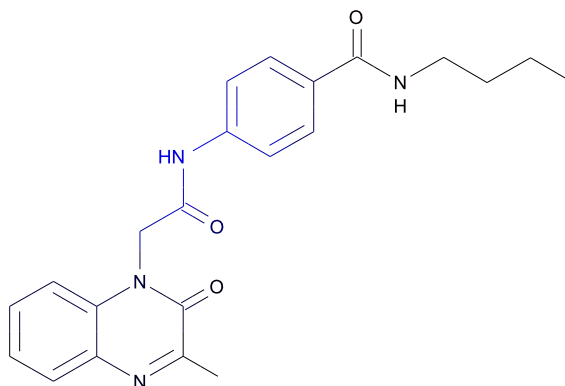C<sub>22</sub>H<sub>24</sub>N<sub>4</sub>O<sub>3</sub>

Molecular Weight: 392.45096

ALogP: 2.212

Rotatable Bonds: 7

Acceptors: 4

Donors: 2

## Model Prediction

Prediction: Non-Irritant

Probability: 0.057

Enrichment: 0.061

Bayesian Score: -6.199

Mahalanobis Distance: 12.635

Mahalanobis Distance p-value: 7.95e-007

Prediction: Positive if the Bayesian score is above the estimated best cutoff value from minimizing the false positive and false negative rate.

Probability: The estimated probability that the sample is in the positive category. This assumes that the Bayesian score follows a normal distribution and is different from the prediction using a cutoff.

Enrichment: An estimate of enrichment, that is, the increased likelihood (versus random) of this sample being in the category. Bayesian Score: The standard Laplacian-modified Bayesian score.

Mahalanobis Distance: The Mahalanobis distance (MD) is the distance to the center of the training data. The larger the MD, the less trustworthy the prediction.

Mahalanobis Distance p-value: The p-value gives the fraction of training data with an MD greater than or equal to the one for the given sample, assuming normally distributed data. The smaller the p-value, the less trustworthy the prediction. For highly non-normal X properties (e.g., fingerprints), the MD p-value is wildly inaccurate.

## Structural Similar Compounds

| Name               | 5-Norbornene-2,3-dicarboxylic acid, 1,4,5,6,7,7-hexachloro-                                                                                       | 1-Piperazineacetic acid, 4-(2-hydroxyethyl)-alpha-phenyl-, 2,6-xylyl ester, monohydrochloride                                                                    | p-Acetophenetidine, 3'-(bis(2-hydroxyethyl)amino)- |
|--------------------|---------------------------------------------------------------------------------------------------------------------------------------------------|------------------------------------------------------------------------------------------------------------------------------------------------------------------|----------------------------------------------------|
| Structure          |                                                                                                                                                   |                                                                                                                                                                  |                                                    |
| Actual Endpoint    | Irritant                                                                                                                                          | Irritant                                                                                                                                                         | Non-Irritant                                       |
| Predicted Endpoint | Irritant                                                                                                                                          | Irritant                                                                                                                                                         | Non-Irritant                                       |
| Distance           | 0.730                                                                                                                                             | 0.792                                                                                                                                                            | 0.796                                              |
| Reference          | 85JCAE "Prehled Prumyslove Toxikologie; Organicke Latky," Marhold, J., Prague, Czechoslovakia, Avicenum, 1986 Volume(issue)/page/year: -,581,1986 | BCFAAI Bollettino Chimico Farmaceutico. (Societa Editoriale Farmaceutica, Via Ausonio 12, 20123 Milan, Italy) V.33- 1894- Volume(issue)/page/year: 107,3 10,1968 | 28ZPAK -,100,72                                    |

## Model Applicability

Unknown features are fingerprint features in the query molecule, but not found in the training set.

1. All properties and OPS components are within expected ranges.

## Feature Contribution

### Top features for positive contribution

| Fingerprint | Bit/Smiles | Feature Structure | Score | Irritant in training set |
|-------------|------------|-------------------|-------|--------------------------|
|             |            |                   |       |                          |

|                                               |                   |                                                                                                                                                                 |              |                                 |
|-----------------------------------------------|-------------------|-----------------------------------------------------------------------------------------------------------------------------------------------------------------|--------------|---------------------------------|
| FCFP_12                                       | 580453787         | 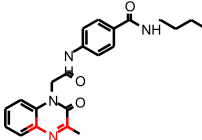<br><chem>[*]C(=N[c](:[*]):[*])</chem><br><chem>[*]</chem>                   | 0.079        | 9 out of 9                      |
| FCFP_12                                       | 565968762         | <br><chem>[*]N=C(C)C(=[*])[*]</chem><br><chem>]</chem>                       | 0.075        | 78 out of 79                    |
| FCFP_12                                       | -1549103449       | <br><chem>[*]NC(=O)[c](:[*]):[*]</chem><br><chem>]</chem>                    | 0.073        | 5 out of 5                      |
| <b>Top Features for negative contribution</b> |                   |                                                                                                                                                                 |              |                                 |
| <b>Fingerprint</b>                            | <b>Bit/Smiles</b> | <b>Feature Structure</b>                                                                                                                                        | <b>Score</b> | <b>Irritant in training set</b> |
| FCFP_12                                       | 1175665944        | <br><chem>[*]CC(=O)N[c](:[cH]:[</chem><br><chem>*)][cH]:[*]</chem>          | -1.020       | 2 out of 8                      |
| FCFP_12                                       | -1838187238       | <br><chem>[*]C(=[*])N[c]1:[cH]:</chem><br><chem>[cH]:[*][cH]:[cH]:1</chem> | -0.692       | 5 out of 12                     |

|         |            |                                                                                                                                           |        |            |
|---------|------------|-------------------------------------------------------------------------------------------------------------------------------------------|--------|------------|
| FCFP_12 | 2007573814 | 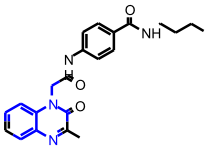<br><chem>[*]CN1C(=[*])N=C1C2=CC=CC=C2C(=O)NCCC</chem> | -0.650 | 0 out of 1 |
|---------|------------|-------------------------------------------------------------------------------------------------------------------------------------------|--------|------------|

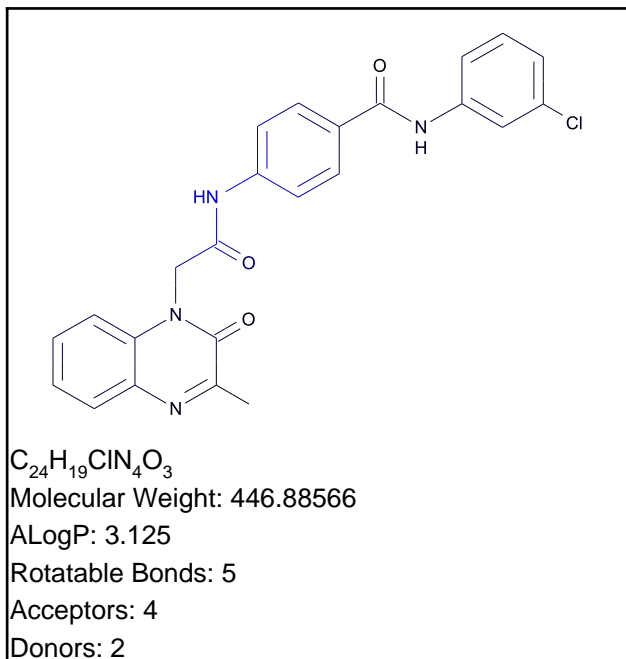

### Model Prediction

Prediction: Non-Irritant

Probability: 0.004

Enrichment: 0.004

Bayesian Score: -7.507

Mahalanobis Distance: 10.918

Mahalanobis Distance p-value: 0.00339

Prediction: Positive if the Bayesian score is above the estimated best cutoff value from minimizing the false positive and false negative rate.

Probability: The estimated probability that the sample is in the positive category. This assumes that the Bayesian score follows a normal distribution and is different from the prediction using a cutoff.

Enrichment: An estimate of enrichment, that is, the increased likelihood (versus random) of this sample being in the category. Bayesian Score: The standard Laplacian-modified Bayesian score.

Mahalanobis Distance: The Mahalanobis distance (MD) is the distance to the center of the training data. The larger the MD, the less trustworthy the prediction.

Mahalanobis Distance p-value: The p-value gives the fraction of training data with an MD greater than or equal to the one for the given sample, assuming normally distributed data. The smaller the p-value, the less trustworthy the prediction. For highly non-normal X properties (e.g., fingerprints), the MD p-value is wildly inaccurate.

### Structural Similar Compounds

| Name               | 5-Norbornene-2,3-dicarboxylic acid, 1,4,5,6,7,7-hexachloro-                                                                                          | Anthraquinone, 1,1'-iminodi-                                                                                                                         | 1-Piperazineacetic acid, 4-(2-hydroxyethyl)-alpha-phenyl-, 2,6-xylyl ester, monohydrochloride                                                                    |
|--------------------|------------------------------------------------------------------------------------------------------------------------------------------------------|------------------------------------------------------------------------------------------------------------------------------------------------------|------------------------------------------------------------------------------------------------------------------------------------------------------------------|
| Structure          | 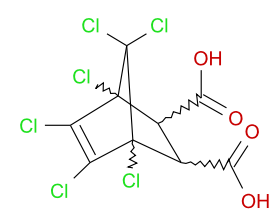                                                                  |                                                                   |                                                                               |
| Actual Endpoint    | Irritant                                                                                                                                             | Irritant                                                                                                                                             | Irritant                                                                                                                                                         |
| Predicted Endpoint | Irritant                                                                                                                                             | Non-Irritant                                                                                                                                         | Irritant                                                                                                                                                         |
| Distance           | 0.698                                                                                                                                                | 0.797                                                                                                                                                | 0.815                                                                                                                                                            |
| Reference          | 85JCAE "Prehled Prumyslove Toxikologie; Organicke Latky," Marhold, J., Prague, Czechoslovakia, Avicenum, 1986<br>Volume(issue)/page/year: -,581,1986 | 85JCAE "Prehled Prumyslove Toxikologie; Organicke Latky," Marhold, J., Prague, Czechoslovakia, Avicenum, 1986<br>Volume(issue)/page/year: -,735,1986 | BCFAAI Bollettino Chimico Farmaceutico. (Societa Editoriale Farmaceutica, Via Ausonio 12, 20123 Milan, Italy) V.33- 1894- Volume(issue)/page/year: 107,3 10,1968 |

### Model Applicability

Unknown features are fingerprint features in the query molecule, but not found in the training set.

- All properties and OPS components are within expected ranges.

### Feature Contribution

#### Top features for positive contribution

| Fingerprint | Bit/Smiles | Feature Structure | Score | Irritant in training set |
|-------------|------------|-------------------|-------|--------------------------|
|             |            |                   |       |                          |



|                                               |                   |                                                                                                                                                                  |              |                                 |
|-----------------------------------------------|-------------------|------------------------------------------------------------------------------------------------------------------------------------------------------------------|--------------|---------------------------------|
| FCFP_12                                       | 580453787         | 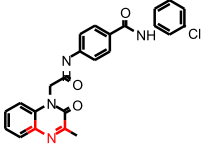<br><chem>[*]C(=N[c](:[*]):[*])</chem><br><chem>[*]</chem>                    | 0.079        | 9 out of 9                      |
| FCFP_12                                       | 565968762         | <br><chem>[*]N=C(C(C)C(=[*]))[*]</chem><br><chem>]</chem>                     | 0.075        | 78 out of 79                    |
| FCFP_12                                       | -1549103449       | <br><chem>[*]NC(=O)[c](:[*]):[*]</chem><br><chem>]</chem>                     | 0.073        | 5 out of 5                      |
| <b>Top Features for negative contribution</b> |                   |                                                                                                                                                                  |              |                                 |
| <b>Fingerprint</b>                            | <b>Bit/Smiles</b> | <b>Feature Structure</b>                                                                                                                                         | <b>Score</b> | <b>Irritant in training set</b> |
| FCFP_12                                       | 1175665944        | <br><chem>[*]CC(=O)N[c](:[cH]:[</chem><br><chem>*):[cH]:[*]</chem>           | -1.020       | 2 out of 8                      |
| FCFP_12                                       | -1838187238       | <br><chem>[*]C(=[*])N[c]1:[cH]:</chem><br><chem>[cH]:[*]:[cH]:[cH]:1</chem> | -0.692       | 5 out of 12                     |

|         |            |                                                                                                                                                           |        |            |
|---------|------------|-----------------------------------------------------------------------------------------------------------------------------------------------------------|--------|------------|
| FCFP_12 | 2007573814 | 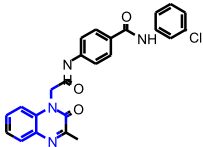<br><chem>[*]CN1C(=[*])[*]=N[C]2:[cH]:[*]:[cH]:[cH]:[cH]:[c]1:2</chem> | -0.650 | 0 out of 1 |
|---------|------------|-----------------------------------------------------------------------------------------------------------------------------------------------------------|--------|------------|

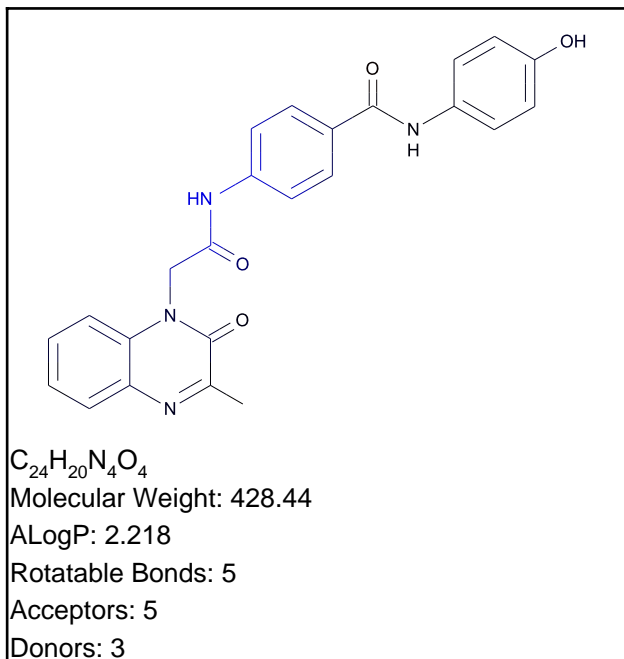**Model Prediction**

Prediction: Non-Irritant

Probability: 0.021

Enrichment: 0.023

Bayesian Score: -6.700

Mahalanobis Distance: 11.932

Mahalanobis Distance p-value: 3.78e-005

Prediction: Positive if the Bayesian score is above the estimated best cutoff value from minimizing the false positive and false negative rate.

Probability: The estimated probability that the sample is in the positive category. This assumes that the Bayesian score follows a normal distribution and is different from the prediction using a cutoff.

Enrichment: An estimate of enrichment, that is, the increased likelihood (versus random) of this sample being in the category.  
 Bayesian Score: The standard Laplacian-modified Bayesian score.

Mahalanobis Distance: The Mahalanobis distance (MD) is the distance to the center of the training data. The larger the MD, the less trustworthy the prediction.

Mahalanobis Distance p-value: The p-value gives the fraction of training data with an MD greater than or equal to the one for the given sample, assuming normally distributed data. The smaller the p-value, the less trustworthy the prediction. For highly non-normal X properties (e.g., fingerprints), the MD p-value is wildly inaccurate.

**Structural Similar Compounds**

| Name               | 2-Anthracenesulfonic acid, 1-amino-9,10-dihydro-9,10-dioxo-4-(2,4,6-trimethylanilino)-, monosodium salt                                            | 5-Norbornene-2,3-dicarboxylic acid, 1,4,5,6,7,7-hexachloro-                                                                                       | p-Acetophenetidine, 3'-(bis(2-hydroxyethyl)amino)- |
|--------------------|----------------------------------------------------------------------------------------------------------------------------------------------------|---------------------------------------------------------------------------------------------------------------------------------------------------|----------------------------------------------------|
| Structure          |                                                                                                                                                    |                                                                                                                                                   |                                                    |
| Actual Endpoint    | Irritant                                                                                                                                           | Irritant                                                                                                                                          | Non-Irritant                                       |
| Predicted Endpoint | Non-Irritant                                                                                                                                       | Irritant                                                                                                                                          | Non-Irritant                                       |
| Distance           | 0.808                                                                                                                                              | 0.820                                                                                                                                             | 0.834                                              |
| Reference          | 85JCAE "Prehled Prumyslove Toxikologie; Organicke Latky," Marhold, J., Prague, Czechoslovakia, Avicenum, 1986 Volume(issue)/page/year: -,1327,1986 | 85JCAE "Prehled Prumyslove Toxikologie; Organicke Latky," Marhold, J., Prague, Czechoslovakia, Avicenum, 1986 Volume(issue)/page/year: -,581,1986 | 28ZPAK -,100,72                                    |

**Model Applicability**

Unknown features are fingerprint features in the query molecule, but not found in the training set.

- All properties and OPS components are within expected ranges.

**Feature Contribution****Top features for positive contribution**

| Fingerprint | Bit/Smiles | Feature Structure | Score | Irritant in training set |
|-------------|------------|-------------------|-------|--------------------------|
|-------------|------------|-------------------|-------|--------------------------|

|                                               |                   |                                                                                                                                                                  |              |                                 |
|-----------------------------------------------|-------------------|------------------------------------------------------------------------------------------------------------------------------------------------------------------|--------------|---------------------------------|
| FCFP_12                                       | 580453787         | 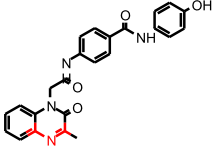<br><chem>[*]C(=N[c](:[*]):[*])</chem><br><chem>[*]</chem>                    | 0.079        | 9 out of 9                      |
| FCFP_12                                       | 565968762         | <br><chem>[*]N=C(C(C)C(=[*]))[*]</chem><br><chem>]</chem>                     | 0.075        | 78 out of 79                    |
| FCFP_12                                       | -1549103449       | <br><chem>[*]NC(=O)[c](:[*]):[*]</chem><br><chem>]</chem>                     | 0.073        | 5 out of 5                      |
| <b>Top Features for negative contribution</b> |                   |                                                                                                                                                                  |              |                                 |
| <b>Fingerprint</b>                            | <b>Bit/Smiles</b> | <b>Feature Structure</b>                                                                                                                                         | <b>Score</b> | <b>Irritant in training set</b> |
| FCFP_12                                       | 1175665944        | <br><chem>[*]CC(=O)N[c](:[cH]:[cH]:[cH]:[cH]):[*]</chem><br><chem>[*]</chem> | -1.020       | 2 out of 8                      |
| FCFP_12                                       | -1838187238       | <br><chem>[*]C(=[*])N[c]1:[cH]:[cH]:[*]:[cH]:[cH]:1</chem>                  | -0.692       | 5 out of 12                     |

|         |           |                                                                                                                              |        |            |
|---------|-----------|------------------------------------------------------------------------------------------------------------------------------|--------|------------|
| FCFP_12 | 451043714 | 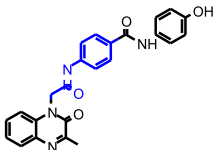<br><chem>*CC(=O)Nc1c[nH]c2ccccc12</chem> | -0.650 | 0 out of 1 |
|---------|-----------|------------------------------------------------------------------------------------------------------------------------------|--------|------------|

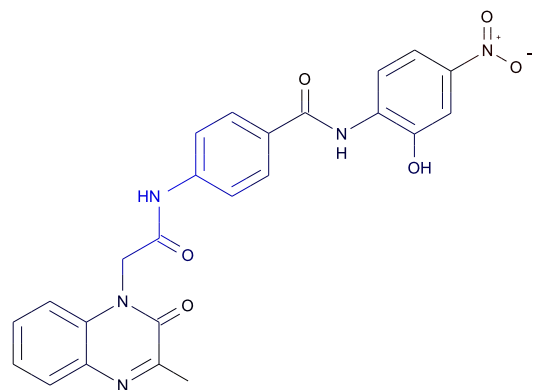
 $C_{24}H_{19}N_5O_6$ 

Molecular Weight: 473.43756

ALogP: 2.113

Rotatable Bonds: 6

Acceptors: 7

Donors: 3

## Model Prediction

Prediction: Non-Irritant

Probability: 0.012

Enrichment: 0.013

Bayesian Score: -6.975

Mahalanobis Distance: 12.655

Mahalanobis Distance p-value: 7.07e-007

Prediction: Positive if the Bayesian score is above the estimated best cutoff value from minimizing the false positive and false negative rate.

Probability: The estimated probability that the sample is in the positive category. This assumes that the Bayesian score follows a normal distribution and is different from the prediction using a cutoff.

Enrichment: An estimate of enrichment, that is, the increased likelihood (versus random) of this sample being in the category.

Bayesian Score: The standard Laplacian-modified Bayesian score.

Mahalanobis Distance: The Mahalanobis distance (MD) is the distance to the center of the training data. The larger the MD, the less trustworthy the prediction.

Mahalanobis Distance p-value: The p-value gives the fraction of training data with an MD greater than or equal to the one for the given sample, assuming normally distributed data. The smaller the p-value, the less trustworthy the prediction. For highly non-normal X properties (e.g., fingerprints), the MD p-value is wildly inaccurate.

## Structural Similar Compounds

| Name               | 2-Anthracenesulfonic acid, 1-amino-9,10-dihydro-9,10-dioxo-4-(2,4,6-trimethylanilino)-, monosodium salt                                            | 2,2'-Stilbenedisulfonic acid, 4,4'-dinitro-                                                                                                        | Urea, 1,3-bis(2-benzothiazolythiomethyl)-                                                                                                                                      |
|--------------------|----------------------------------------------------------------------------------------------------------------------------------------------------|----------------------------------------------------------------------------------------------------------------------------------------------------|--------------------------------------------------------------------------------------------------------------------------------------------------------------------------------|
| Structure          |                                                                                                                                                    |                                                                                                                                                    |                                                                                                                                                                                |
| Actual Endpoint    | Irritant                                                                                                                                           | Irritant                                                                                                                                           | Irritant                                                                                                                                                                       |
| Predicted Endpoint | Non-Irritant                                                                                                                                       | Irritant                                                                                                                                           | Irritant                                                                                                                                                                       |
| Distance           | 0.743                                                                                                                                              | 0.858                                                                                                                                              | 0.912                                                                                                                                                                          |
| Reference          | 85JCAE "Prehled Prumyslove Toxikologie; Organicke Latky," Marhold, J., Prague, Czechoslovakia, Avicenum, 1986 Volume(issue)/page/year: -,1327,1986 | 85JCAE "Prehled Prumyslove Toxikologie; Organicke Latky," Marhold, J., Prague, Czechoslovakia, Avicenum, 1986 Volume(issue)/page/year: -,1062,1986 | AMIHBC AMA Archives of Industrial Hygiene and Occupational Medicine. (Chicago, IL) V.2-10, 1950-54. For publisher information, see AEHLAU. Volume(issue)/page/year: 5,311,1952 |

## Model Applicability

Unknown features are fingerprint features in the query molecule, but not found in the training set.

1. All properties and OPS components are within expected ranges.

## Feature Contribution

### Top features for positive contribution

| Fingerprint | Bit/Smiles | Feature Structure | Score | Irritant in training set |
|-------------|------------|-------------------|-------|--------------------------|
|             |            |                   |       |                          |

| FCFP_12                                | 5           | 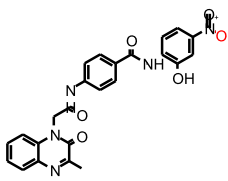<br>[*][O-]                                         | 0.085  | 27 out of 27             |
|----------------------------------------|-------------|----------------------------------------------------------------------------------------------------------------------------------------|--------|--------------------------|
| FCFP_12                                | 8           | <br>[*][N+](=[*])[*]                                | 0.084  | 20 out of 20             |
| FCFP_12                                | 580453787   | <br>[*]C(=N[c](-[*]):[*])<br>[*]                    | 0.079  | 9 out of 9               |
| Top Features for negative contribution |             |                                                                                                                                        |        |                          |
| Fingerprint                            | Bit/Smiles  | Feature Structure                                                                                                                      | Score  | Irritant in training set |
| FCFP_12                                | 1175665944  | <br>[*]CC(=O)N[c](-[cH]:[<br>*])[cH]:[*]           | -1.020 | 2 out of 8               |
| FCFP_12                                | -1838187238 | <br>[*]C(=[*])N[c]1:[cH]:<br>[cH]:[*]:[cH]:[cH]:1 | -0.692 | 5 out of 12              |

|         |             |                                                                                                                                                                       |        |            |
|---------|-------------|-----------------------------------------------------------------------------------------------------------------------------------------------------------------------|--------|------------|
| FCFP_12 | -1883332927 | 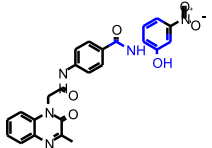 <p data-bbox="1260 272 1423 324">[*]C(=*)N[c]1:[cH]:<br/>[cH]:[*]:[cH]:[c]:1O</p> | -0.650 | 0 out of 1 |
|---------|-------------|-----------------------------------------------------------------------------------------------------------------------------------------------------------------------|--------|------------|



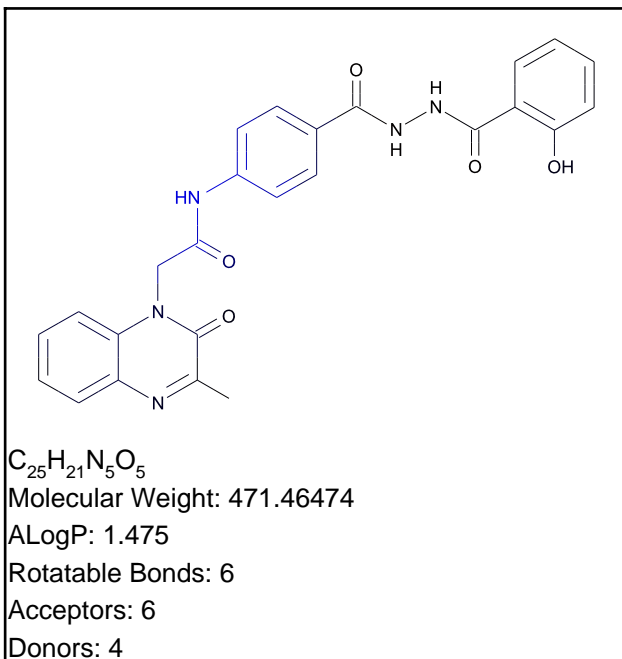

### Model Prediction

Prediction: Non-Irritant

Probability: 0.029

Enrichment: 0.032

Bayesian Score: -6.546

Mahalanobis Distance: 12.616

Mahalanobis Distance p-value: 8.89e-007

Prediction: Positive if the Bayesian score is above the estimated best cutoff value from minimizing the false positive and false negative rate.

Probability: The estimated probability that the sample is in the positive category. This assumes that the Bayesian score follows a normal distribution and is different from the prediction using a cutoff.

Enrichment: An estimate of enrichment, that is, the increased likelihood (versus random) of this sample being in the category.

Bayesian Score: The standard Laplacian-modified Bayesian score.

Mahalanobis Distance: The Mahalanobis distance (MD) is the distance to the center of the training data. The larger the MD, the less trustworthy the prediction.

Mahalanobis Distance p-value: The p-value gives the fraction of training data with an MD greater than or equal to the one for the given sample, assuming normally distributed data. The smaller the p-value, the less trustworthy the prediction. For highly non-normal X properties (e.g., fingerprints), the MD p-value is wildly inaccurate.

### Structural Similar Compounds

| Name               | Anthraquinone, 2-bromo-1,8-diamino-4,5-dihydroxy-                                                                                                                                                                 | 2-Anthracenesulfonic acid, 1-amino-9,10-dihydro-9,10-dioxo-4-(2,4,6-trimethylanilino)-, monosodium salt                                               | Glutamic acid, N-(p-(methylamino)benzoyl)-, sodium salt                                                                                                         |
|--------------------|-------------------------------------------------------------------------------------------------------------------------------------------------------------------------------------------------------------------|-------------------------------------------------------------------------------------------------------------------------------------------------------|-----------------------------------------------------------------------------------------------------------------------------------------------------------------|
| Structure          |                                                                                                                                                                                                                   |                                                                                                                                                       |                                                                                                                                                                 |
| Actual Endpoint    | Irritant                                                                                                                                                                                                          | Irritant                                                                                                                                              | Irritant                                                                                                                                                        |
| Predicted Endpoint | Non-Irritant                                                                                                                                                                                                      | Non-Irritant                                                                                                                                          | Non-Irritant                                                                                                                                                    |
| Distance           | 0.876                                                                                                                                                                                                             | 0.916                                                                                                                                                 | 0.972                                                                                                                                                           |
| Reference          | 28ZPAK "Sbornik Vysledku Toxilogickeho Vysetreni Latek A Pripravku," Marhold, J.V., Institut Pro Vychovu Vedoucich Pracovniku Chemickeho Prumyclu Praha, Czechoslovakia, 1972<br>Volume(issue)/page/year: -,244,1 | 85JCAE "Prehled Prumyslove Toxikologie; Organicke Latky," Marhold, J., Prague, Czechoslovakia, Avicenum, 1986<br>Volume(issue)/page/year: -,1327,1986 | FTOD7 Food and Chemical Toxicology. (Pergamon Press Inc., Maxwell House, Fairview Park, Elmsford, NY 10523) V.20- 1982-<br>Volume(issue)/page/year: 20,563,1982 |

### Model Applicability

Unknown features are fingerprint features in the query molecule, but not found in the training set.

1. All properties and OPS components are within expected ranges.

### Feature Contribution

#### Top features for positive contribution

| Fingerprint | Bit/Smiles | Feature Structure | Score | Irritant in training set |
|-------------|------------|-------------------|-------|--------------------------|
|             |            |                   |       |                          |

|                                               |                   |                                                                                                                                                          |              |                                 |
|-----------------------------------------------|-------------------|----------------------------------------------------------------------------------------------------------------------------------------------------------|--------------|---------------------------------|
| FCFP_12                                       | -309153329        | 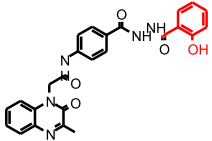<br><chem>[*]C(=[*])[c]1:[cH]:[cH]:[cH]:[cH]:[c]:1O</chem>            | 0.082        | 13 out of 13                    |
| FCFP_12                                       | 580453787         | <br><chem>[*]C(=N[c](:[*]):[*])</chem><br><chem>[*]</chem>            | 0.079        | 9 out of 9                      |
| FCFP_12                                       | 565968762         | <br><chem>[*]N=C(C)C(=[*])[*]</chem>                                  | 0.075        | 78 out of 79                    |
| <b>Top Features for negative contribution</b> |                   |                                                                                                                                                          |              |                                 |
| <b>Fingerprint</b>                            | <b>Bit/Smiles</b> | <b>Feature Structure</b>                                                                                                                                 | <b>Score</b> | <b>Irritant in training set</b> |
| FCFP_12                                       | 1175665944        | <br><chem>[*]CC(=O)N(c)[c]([cH]:[cH]:[cH]:[cH]:[c]:[cH]:[*])</chem> | -1.020       | 2 out of 8                      |
| FCFP_12                                       | -1838187238       | <br><chem>[*]C(=[*])N(c]1:[cH]:[cH]:[cH]:[cH]:[c]:1</chem>          | -0.692       | 5 out of 12                     |

|         |           |                                                                                                                                                                 |        |            |
|---------|-----------|-----------------------------------------------------------------------------------------------------------------------------------------------------------------|--------|------------|
| FCFP_12 | 451043714 | 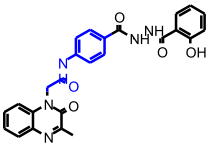<br><chem>*CC(=O)N(c1:[cH]:[cH]:[c]([*]):[cH]:[cH]:1)N2CCN3CCN(C2)CC3</chem> | -0.650 | 0 out of 1 |
|---------|-----------|-----------------------------------------------------------------------------------------------------------------------------------------------------------------|--------|------------|

# Sorafenib

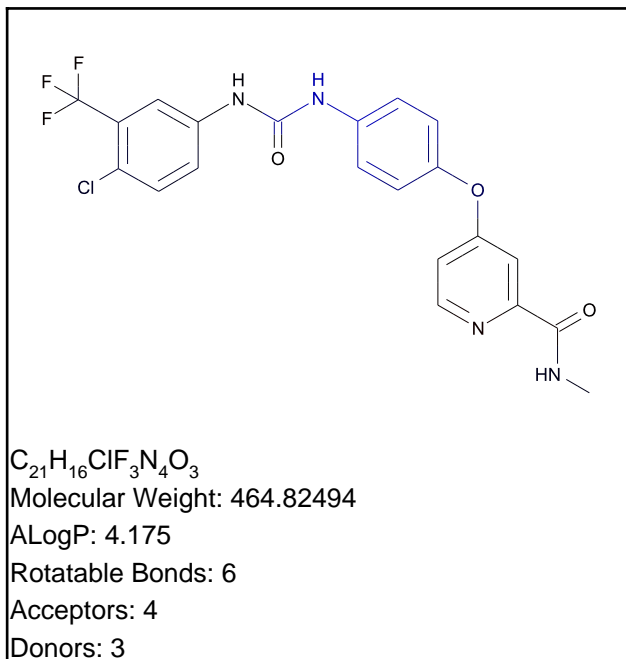

## Model Prediction

Prediction: Non-Irritant

Probability: 0.264

Enrichment: 0.287

Bayesian Score: -5.229

Mahalanobis Distance: 8.271

Mahalanobis Distance p-value: 0.791

Prediction: Positive if the Bayesian score is above the estimated best cutoff value from minimizing the false positive and false negative rate.

Probability: The estimated probability that the sample is in the positive category. This assumes that the Bayesian score follows a normal distribution and is different from the prediction using a cutoff.

Enrichment: An estimate of enrichment, that is, the increased likelihood (versus random) of this sample being in the category. Bayesian Score: The standard Laplacian-modified Bayesian score.

Mahalanobis Distance: The Mahalanobis distance (MD) is the distance to the center of the training data. The larger the MD, the less trustworthy the prediction.

Mahalanobis Distance p-value: The p-value gives the fraction of training data with an MD greater than or equal to the one for the given sample, assuming normally distributed data. The smaller the p-value, the less trustworthy the prediction. For highly non-normal X properties (e.g., fingerprints), the MD p-value is wildly inaccurate.

# TOPKAT\_Skin\_Irritancy\_None\_vs\_Irritant

## Structural Similar Compounds

| Name               | 5-Norbornene-2,3-dicarboxylic acid, 1,4,5,6,7,7-hexachloro-                                                                                       | Benzenesulfonic acid, 2,2'-(4,4'-biphenylene)d i-, disodium salt                                          | Sulfide, bis(4-t-butyl-m-cresyl)-                                                                                                                                              |
|--------------------|---------------------------------------------------------------------------------------------------------------------------------------------------|-----------------------------------------------------------------------------------------------------------|--------------------------------------------------------------------------------------------------------------------------------------------------------------------------------|
| Structure          | 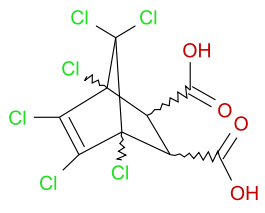                                                               |                        |                                                                                             |
| Actual Endpoint    | Irritant                                                                                                                                          | Irritant                                                                                                  | Irritant                                                                                                                                                                       |
| Predicted Endpoint | Irritant                                                                                                                                          | Non-Irritant                                                                                              | Irritant                                                                                                                                                                       |
| Distance           | 0.844                                                                                                                                             | 0.871                                                                                                     | 0.884                                                                                                                                                                          |
| Reference          | 85JCAE "Prehled Prumyslove Toxikologie; Organické Latky," Marhold, J., Prague, Czechoslovakia, Avicenum, 1986 Volume(issue)/page/year: -,581,1986 | MVCRB3 MVC-Report. (Stockholm, Sweden) No.1-2, 1972-73. Discontinued. Volume(issue)/page/year: 2,193,1973 | AMIHBC AMA Archives of Industrial Hygiene and Occupational Medicine. (Chicago, IL) V.2-10, 1950-54. For publisher information, see AEHLAU. Volume(issue)/page/year: 5,311,1952 |

## Model Applicability

Unknown features are fingerprint features in the query molecule, but not found in the training set.

1. All properties and OPS components are within expected ranges.

## Feature Contribution

### Top features for positive contribution

| Fingerprint | Bit/Smiles | Feature Structure | Score | Irritant in training set |
|-------------|------------|-------------------|-------|--------------------------|
|             |            |                   |       |                          |

|                                               |                   |                                                                                                                                                 |              |                                 |
|-----------------------------------------------|-------------------|-------------------------------------------------------------------------------------------------------------------------------------------------|--------------|---------------------------------|
| FCFP_12                                       | -124655670        | 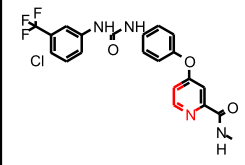<br>[*]:[cH]:[cH]:n:[*]                                      | 0.082        | 13 out of 13                    |
| FCFP_12                                       | -1539132615       | <br>[*][c](:[*]):[c](C):n<br>:[*]                            | 0.079        | 9 out of 9                      |
| FCFP_12                                       | -1695756380       | <br>[*][c]1:[*]:[c]([*]):<br>n:[cH]:[cH]:1                   | 0.077        | 7 out of 7                      |
| <b>Top Features for negative contribution</b> |                   |                                                                                                                                                 |              |                                 |
| <b>Fingerprint</b>                            | <b>Bit/Smiles</b> | <b>Feature Structure</b>                                                                                                                        | <b>Score</b> | <b>Irritant in training set</b> |
| FCFP_12                                       | -789307649        | <br>[*]O[c]1:[cH]:[cH]:[c<br>](NC(=[*])[*]):[cH]:<br>[cH]:1 | -1.539       | 0 out of 4                      |
| FCFP_12                                       | -1838187238       | <br>[*]C(=[*])N[c]1:[cH]:<br>[cH]:[*]:[cH]:[cH]:1          | -0.692       | 5 out of 12                     |

|         |            |                                                                                                                                                       |        |              |
|---------|------------|-------------------------------------------------------------------------------------------------------------------------------------------------------|--------|--------------|
| FCFP_12 | 1294255210 | 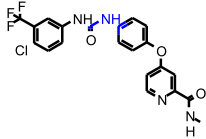 <p data-bbox="1260 267 1407 316">[*]C(=[*])N[c]([*]):<br/>[*]</p> | -0.486 | 12 out of 22 |
|---------|------------|-------------------------------------------------------------------------------------------------------------------------------------------------------|--------|--------------|

15a

TOPKAT\_Carcinogenic\_Potency\_TD50\_Mouse

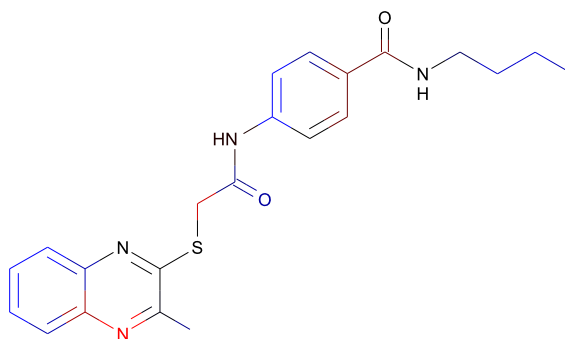C<sub>22</sub>H<sub>24</sub>N<sub>4</sub>O<sub>2</sub>S

Molecular Weight: 408.51656

ALogP: 3.83

Rotatable Bonds: 8

Acceptors: 5

Donors: 2

### Model Prediction

Prediction: 40.565

Unit: mg/kg\_body\_weight/day

Mahalanobis Distance: 12.772

Mahalanobis Distance p-value: 4.23e-007

Mahalanobis Distance: The Mahalanobis distance (MD) is a generalization of the Euclidean distance that accounts for correlations among the X properties. It is calculated as the distance to the center of the training data. The larger the MD, the less trustworthy the prediction.

Mahalanobis Distance p-value: The p-value gives the fraction of training data with an MD greater than or equal to the one for the given sample, assuming normally distributed data. The smaller the p-value, the less trustworthy the prediction. For highly non-normal X properties (e.g., fingerprints), the MD p-value is wildly inaccurate.

### Structural Similar Compounds

| Name                        | 4-Chloro-6-(2,3-xylidino)-2-pyridylthio(N-b-hydroxy-ethyl) acetamide | 455     | Compound LY171883 |
|-----------------------------|----------------------------------------------------------------------|---------|-------------------|
| Structure                   |                                                                      |         |                   |
| Actual Endpoint (-log C)    | 3.91517                                                              | 3.87681 | 3.45372           |
| Predicted Endpoint (-log C) | 3.92186                                                              | 3.77582 | 2.84749           |
| Distance                    | 0.664                                                                | 0.694   | 0.694             |
| Reference                   | CPDB                                                                 | CPDB    | CPDB              |

### Model Applicability

Unknown features are fingerprint features in the query molecule, but not found in the training set.

- All properties and OPS components are within expected ranges.

### Feature Contribution

#### Top features for positive contribution

| Fingerprint | Bit/Smiles | Feature Structure | Score |
|-------------|------------|-------------------|-------|
| ECFP_6      | 655739385  | <br>[*]:n:[*]     | 0.229 |

|                                               |                   |                                                                                                                              |              |
|-----------------------------------------------|-------------------|------------------------------------------------------------------------------------------------------------------------------|--------------|
| ECFP_6                                        | 1559650422        | 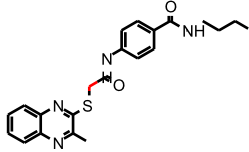<br><chem>[*]C[*]</chem>                  | 0.203        |
| ECFP_6                                        | 834876373         | <br><chem>[*][c](:[*]):n:[c](:[*])</chem> | 0.163        |
| <b>Top Features for negative contribution</b> |                   |                                                                                                                              |              |
| <b>Fingerprint</b>                            | <b>Bit/Smiles</b> | <b>Feature Structure</b>                                                                                                     | <b>Score</b> |
| ECFP_6                                        | 1996767644        | <br><chem>[*][c](:[*]):[cH]:[cH]</chem>   | -0.251       |
| ECFP_6                                        | 642810091         | <br><chem>[*][c](:[*]):[*]</chem>       | -0.247       |
| ECFP_6                                        | 182236392         | <br><chem>[*]:[cH]:[*]</chem>           | -0.232       |





15b

TOPKAT\_Carcinogenic\_Potency\_TD50\_Mouse

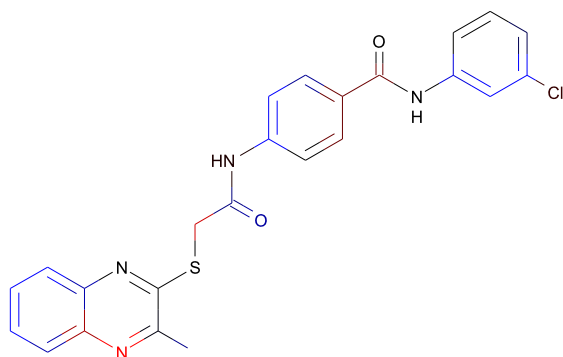C<sub>24</sub>H<sub>19</sub>ClN<sub>4</sub>O<sub>2</sub>S

Molecular Weight: 462.95126

ALogP: 4.743

Rotatable Bonds: 6

Acceptors: 5

Donors: 2

### Model Prediction

Prediction: 9.366

Unit: mg/kg\_body\_weight/day

Mahalanobis Distance: 14.386

Mahalanobis Distance p-value: 2.76e-011

Mahalanobis Distance: The Mahalanobis distance (MD) is a generalization of the Euclidean distance that accounts for correlations among the X properties. It is calculated as the distance to the center of the training data. The larger the MD, the less trustworthy the prediction.

Mahalanobis Distance p-value: The p-value gives the fraction of training data with an MD greater than or equal to the one for the given sample, assuming normally distributed data. The smaller the p-value, the less trustworthy the prediction. For highly non-normal X properties (e.g., fingerprints), the MD p-value is wildly inaccurate.

### Structural Similar Compounds

| Name                        | 646      | Phenolphthalein | Ochratoxin A |
|-----------------------------|----------|-----------------|--------------|
| Structure                   |          |                 |              |
| Actual Endpoint (-log C)    | 0.937339 | 2.43468         | 4.79932      |
| Predicted Endpoint (-log C) | 3.26294  | 3.66084         | 3.6353       |
| Distance                    | 0.799    | 0.822           | 0.835        |
| Reference                   | CPDB     | CPDB            | CPDB         |

### Model Applicability

Unknown features are fingerprint features in the query molecule, but not found in the training set.

- All properties and OPS components are within expected ranges.

### Feature Contribution

#### Top features for positive contribution

| Fingerprint | Bit/Smiles | Feature Structure | Score |
|-------------|------------|-------------------|-------|
| ECFP_6      | 655739385  |                   | 0.229 |

[\*]:n:[\*]

| ECFP_6                                 | 1559650422 | 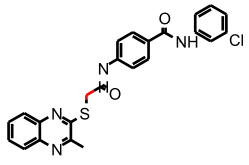<br>[*]C[*]                      | 0.203  |
|----------------------------------------|------------|---------------------------------------------------------------------------------------------------------------------|--------|
| ECFP_6                                 | 834876373  | <br>[*][c](:[*]):n:[c](:[*]):[*] | 0.163  |
| Top Features for negative contribution |            |                                                                                                                     |        |
| Fingerprint                            | Bit/Smiles | Feature Structure                                                                                                   | Score  |
| ECFP_6                                 | 1996767644 | <br>[*][c](:[*]):[cH]:[cH]:[*]   | -0.251 |
| ECFP_6                                 | 642810091  | <br>[*][c](:[*]):[*]           | -0.247 |
| ECFP_6                                 | 182236392  | <br>[*]:[cH]:[*]               | -0.232 |



15c

TOPKAT\_Carcinogenic\_Potency\_TD50\_Mouse

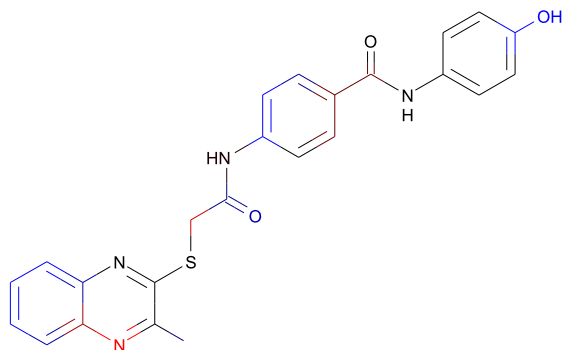
 $C_{24}H_{20}N_4O_3S$ 

Molecular Weight: 444.5056

ALogP: 3.836

Rotatable Bonds: 6

Acceptors: 6

Donors: 3

### Model Prediction

Prediction: 17.665

Unit: mg/kg\_body\_weight/day

Mahalanobis Distance: 13.273

Mahalanobis Distance p-value: 2.6e-008

Mahalanobis Distance: The Mahalanobis distance (MD) is a generalization of the Euclidean distance that accounts for correlations among the X properties. It is calculated as the distance to the center of the training data. The larger the MD, the less trustworthy the prediction.

Mahalanobis Distance p-value: The p-value gives the fraction of training data with an MD greater than or equal to the one for the given sample, assuming normally distributed data. The smaller the p-value, the less trustworthy the prediction. For highly non-normal X properties (e.g., fingerprints), the MD p-value is wildly inaccurate.

### Structural Similar Compounds

| Name                        | Ochratoxin A | 542     | 4-Chloro-6-(2,3-xylylidino)-2-pyridinylthio(N-b-hydroxy-ethyl) acetamide |
|-----------------------------|--------------|---------|--------------------------------------------------------------------------|
| Structure                   |              |         |                                                                          |
| Actual Endpoint (-log C)    | 4.79932      | 4.79932 | 3.91517                                                                  |
| Predicted Endpoint (-log C) | 3.6353       | 3.6353  | 3.92186                                                                  |
| Distance                    | 0.793        | 0.793   | 0.829                                                                    |
| Reference                   | CPDB         | CPDB    | CPDB                                                                     |

### Model Applicability

Unknown features are fingerprint features in the query molecule, but not found in the training set.

1. All properties and OPS components are within expected ranges.

### Feature Contribution

#### Top features for positive contribution

| Fingerprint | Bit/Smiles | Feature Structure | Score |
|-------------|------------|-------------------|-------|
| ECFP_6      | 655739385  |                   | 0.229 |

| ECFP_6                                 | 1559650422 | 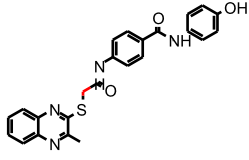<br>[*]C[*]                      | 0.203  |
|----------------------------------------|------------|---------------------------------------------------------------------------------------------------------------------|--------|
| ECFP_6                                 | 834876373  | <br>[*][c](:[*]):n:[c](:[*]):[*] | 0.163  |
| Top Features for negative contribution |            |                                                                                                                     |        |
| Fingerprint                            | Bit/Smiles | Feature Structure                                                                                                   | Score  |
| ECFP_6                                 | 2019062761 | <br>[*]:[c](:[*])O               | -0.258 |
| ECFP_6                                 | 1996767644 | <br>[*][c](:[*]):[cH]:[cH]:[*] | -0.251 |
| ECFP_6                                 | 642810091  | <br>[*][c](:[*]):[*]           | -0.247 |



15d

TOPKAT\_Carcinogenic\_Potency\_TD50\_Mouse

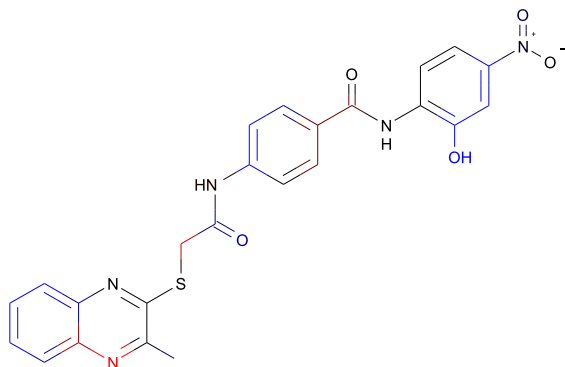C<sub>24</sub>H<sub>19</sub>N<sub>5</sub>O<sub>5</sub>S

Molecular Weight: 489.50316

ALogP: 3.731

Rotatable Bonds: 7

Acceptors: 8

Donors: 3

### Model Prediction

Prediction: 31.468

Unit: mg/kg\_body\_weight/day

Mahalanobis Distance: 14.067

Mahalanobis Distance p-value: 2.14e-010

Mahalanobis Distance: The Mahalanobis distance (MD) is a generalization of the Euclidean distance that accounts for correlations among the X properties. It is calculated as the distance to the center of the training data. The larger the MD, the less trustworthy the prediction.

Mahalanobis Distance p-value: The p-value gives the fraction of training data with an MD greater than or equal to the one for the given sample, assuming normally distributed data. The smaller the p-value, the less trustworthy the prediction. For highly non-normal X properties (e.g., fingerprints), the MD p-value is wildly inaccurate.

### Structural Similar Compounds

| Name                        | Salicylazosulfapyridine | 420     | Ochratoxin A |
|-----------------------------|-------------------------|---------|--------------|
| Structure                   |                         |         |              |
| Actual Endpoint (-log C)    | 2.5034                  | 2.78302 | 4.79932      |
| Predicted Endpoint (-log C) | 3.54214                 | 3.31546 | 3.6353       |
| Distance                    | 0.848                   | 0.901   | 0.913        |
| Reference                   | CPDB                    | CPDB    | CPDB         |

### Model Applicability

Unknown features are fingerprint features in the query molecule, but not found in the training set.

- All properties and OPS components are within expected ranges.

### Feature Contribution

#### Top features for positive contribution

| Fingerprint | Bit/Smiles | Feature Structure | Score |
|-------------|------------|-------------------|-------|
| ECFP_6      | 655739385  | <br>[*]:n:[*]     | 0.229 |



| ECFP_6                                 | 1559650422 | 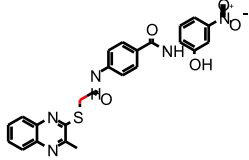<br><chem>[*]C[*]</chem>                      | 0.203  |
|----------------------------------------|------------|----------------------------------------------------------------------------------------------------------------------------------|--------|
| ECFP_6                                 | 834876373  | <br><chem>[*][c](:[*]):n:[c](:[*])</chem>     | 0.163  |
| Top Features for negative contribution |            |                                                                                                                                  |        |
| Fingerprint                            | Bit/Smiles | Feature Structure                                                                                                                | Score  |
| ECFP_6                                 | 2019062761 | <br><chem>[*]:[c](:[*])O</chem>               | -0.258 |
| ECFP_6                                 | 1996767644 | <br><chem>[*][c](:[*]):[cH]:[cH]:[*]</chem> | -0.251 |
| ECFP_6                                 | 642810091  | <br><chem>[*][c](:[*]):[*]</chem>           | -0.247 |



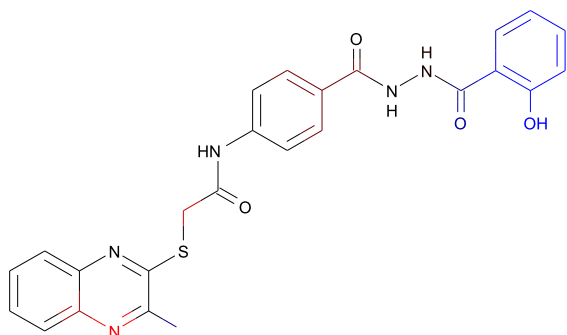

$C_{25}H_{21}N_5O_4S$

Molecular Weight: 487.53034

ALogP: 3.093

Rotatable Bonds: 7

Acceptors: 7

Donors: 4

### Model Prediction

Prediction: 16.061

Unit: mg/kg\_body\_weight/day

Mahalanobis Distance: 13.288

Mahalanobis Distance p-value: 2.39e-008

Mahalanobis Distance: The Mahalanobis distance (MD) is a generalization of the Euclidean distance that accounts for correlations among the X properties. It is calculated as the distance to the center of the training data. The larger the MD, the less trustworthy the prediction.

Mahalanobis Distance p-value: The p-value gives the fraction of training data with an MD greater than or equal to the one for the given sample, assuming normally distributed data. The smaller the p-value, the less trustworthy the prediction. For highly non-normal X properties (e.g., fingerprints), the MD p-value is wildly inaccurate.

### Structural Similar Compounds

| Name                        | Salicylazosulfapyridine | Ochratoxin A | 542     |
|-----------------------------|-------------------------|--------------|---------|
| Structure                   |                         |              |         |
| Actual Endpoint (-log C)    | 2.5034                  | 4.79932      | 4.79932 |
| Predicted Endpoint (-log C) | 3.54214                 | 3.6353       | 3.6353  |
| Distance                    | 0.841                   | 0.870        | 0.870   |
| Reference                   | CPDB                    | CPDB         | CPDB    |

### Model Applicability

Unknown features are fingerprint features in the query molecule, but not found in the training set.

1. All properties and OPS components are within expected ranges.

### Feature Contribution

#### Top features for positive contribution

| Fingerprint | Bit/Smiles | Feature Structure | Score |
|-------------|------------|-------------------|-------|
| ECFP_6      | 655739385  |                   | 0.229 |

|                                               |                   |                                                                                                                                  |              |
|-----------------------------------------------|-------------------|----------------------------------------------------------------------------------------------------------------------------------|--------------|
| ECFP_6                                        | 1559650422        | 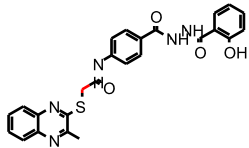<br><chem>[*]C[*]</chem>                      | 0.203        |
| ECFP_6                                        | 834876373         | <br><chem>[*][c](:[*]):n:[c](:[*]):[*]</chem> | 0.163        |
| <b>Top Features for negative contribution</b> |                   |                                                                                                                                  |              |
| <b>Fingerprint</b>                            | <b>Bit/Smiles</b> | <b>Feature Structure</b>                                                                                                         | <b>Score</b> |
| ECFP_6                                        | 2019062761        | <br><chem>[*]:[c](:[*])O</chem>               | -0.258       |
| ECFP_6                                        | 1996767644        | <br><chem>[*][c](:[*]):[cH]:[cH]:[*]</chem> | -0.251       |
| ECFP_6                                        | 642810091         | <br><chem>[*][c](:[*]):[*]</chem>           | -0.247       |



17a

TOPKAT\_Carcinogenic\_Potency\_TD50\_Mouse

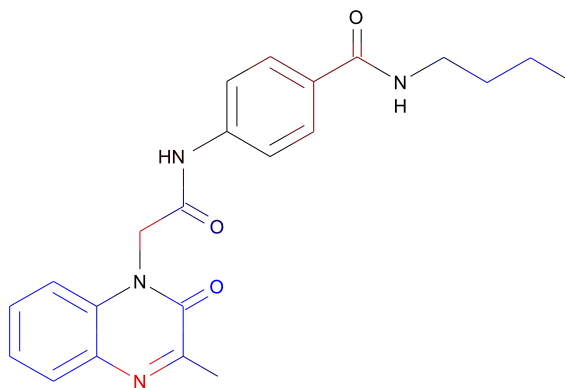C<sub>22</sub>H<sub>24</sub>N<sub>4</sub>O<sub>3</sub>

Molecular Weight: 392.45096

ALogP: 2.212

Rotatable Bonds: 7

Acceptors: 4

Donors: 2

### Model Prediction

Prediction: 142.906

Unit: mg/kg\_body\_weight/day

Mahalanobis Distance: 12.732

Mahalanobis Distance p-value: 5.24e-007

Mahalanobis Distance: The Mahalanobis distance (MD) is a generalization of the Euclidean distance that accounts for correlations among the X properties. It is calculated as the distance to the center of the training data. The larger the MD, the less trustworthy the prediction.

Mahalanobis Distance p-value: The p-value gives the fraction of training data with an MD greater than or equal to the one for the given sample, assuming normally distributed data. The smaller the p-value, the less trustworthy the prediction. For highly non-normal X properties (e.g., fingerprints), the MD p-value is wildly inaccurate.

### Structural Similar Compounds

| Name                        | 455     | 832     | Compound LY171883 |
|-----------------------------|---------|---------|-------------------|
| Structure                   |         |         |                   |
| Actual Endpoint (-log C)    | 3.87681 | 3.45372 | 3.45372           |
| Predicted Endpoint (-log C) | 3.77582 | 2.80429 | 2.84749           |
| Distance                    | 0.635   | 0.676   | 0.682             |
| Reference                   | CPDB    | CPDB    | CPDB              |

### Model Applicability

Unknown features are fingerprint features in the query molecule, but not found in the training set.

1. OPS PC20 out of range. Value: 3.8775. Training min, max, SD, explained variance: -4.3384, 3.4394, 1.14, 0.0162.
2. Unknown ECFP\_2 feature: -597295171: [\*][c](:[\*]):[c](N=[\*]):c:[\*]
3. Unknown ECFP\_2 feature: -1236953626: [\*]N([\*])[c](:[c]([\*]):[\*]):c:[\*]
4. Unknown ECFP\_2 feature: 1483289300: [\*]N=C(C)/C(=[\*])[\*]
5. Unknown ECFP\_2 feature: -661097313: [\*]CN(C(=[\*])[\*])[c](:[\*]):[\*]
6. Unknown ECFP\_2 feature: -37698365: [\*]N([\*])CC(=[\*])[\*]

### Feature Contribution

#### Top features for positive contribution

| Fingerprint | Bit/Smiles | Feature Structure | Score |
|-------------|------------|-------------------|-------|
| ECFP_6      | 655739385  | <br>[*]:n:[*]     | 0.229 |

|                                               |                   |                                                                                                                              |              |
|-----------------------------------------------|-------------------|------------------------------------------------------------------------------------------------------------------------------|--------------|
| ECFP_6                                        | 1559650422        | 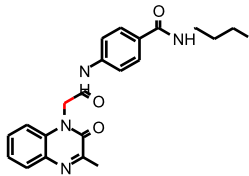<br>[*]C[*]                               | 0.203        |
| ECFP_6                                        | -175146122        | <br>[*]C(=[*])[c](:[cH]:[<br>*]):[cH]:[*] | 0.107        |
| <b>Top Features for negative contribution</b> |                   |                                                                                                                              |              |
| <b>Fingerprint</b>                            | <b>Bit/Smiles</b> | <b>Feature Structure</b>                                                                                                     | <b>Score</b> |
| ECFP_6                                        | 2106656448        | <br>[*]C(=O)[*]                           | -0.275       |
| ECFP_6                                        | 1996767644        | <br>[*][c](:[*]):[cH]:[cH<br>]:[*]      | -0.251       |
| ECFP_6                                        | 642810091         | <br>[*][c](:[*]):[*]                    | -0.247       |





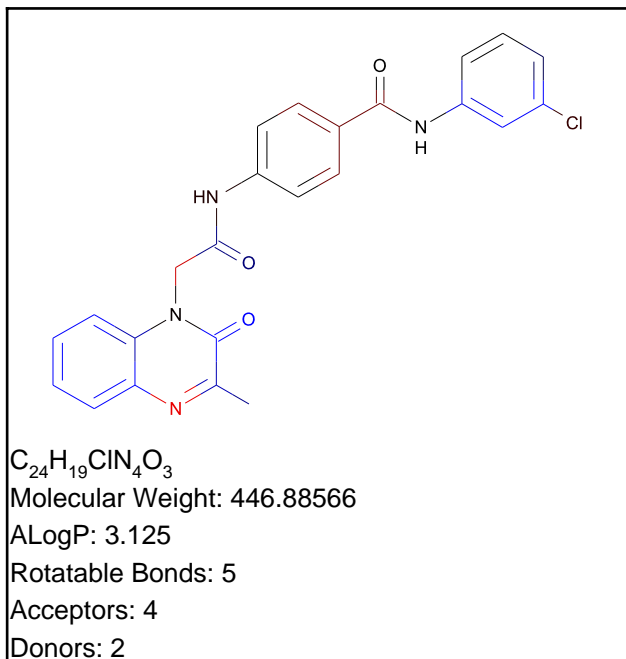

### Model Prediction

Prediction: 33.153

Unit: mg/kg\_body\_weight/day

Mahalanobis Distance: 14.301

Mahalanobis Distance p-value: 4.8e-011

Mahalanobis Distance: The Mahalanobis distance (MD) is a generalization of the Euclidean distance that accounts for correlations among the X properties. It is calculated as the distance to the center of the training data. The larger the MD, the less trustworthy the prediction.

Mahalanobis Distance p-value: The p-value gives the fraction of training data with an MD greater than or equal to the one for the given sample, assuming normally distributed data. The smaller the p-value, the less trustworthy the prediction. For highly non-normal X properties (e.g., fingerprints), the MD p-value is wildly inaccurate.

### Structural Similar Compounds

| Name                        | Phenolphthalein                                                                     | Ochratoxin A                                                                        | 542                                                                                 |
|-----------------------------|-------------------------------------------------------------------------------------|-------------------------------------------------------------------------------------|-------------------------------------------------------------------------------------|
| Structure                   | 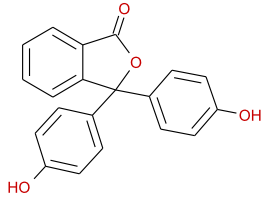 |  |  |
| Actual Endpoint (-log C)    | 2.43468                                                                             | 4.79932                                                                             | 4.79932                                                                             |
| Predicted Endpoint (-log C) | 3.66084                                                                             | 3.6353                                                                              | 3.6353                                                                              |
| Distance                    | 0.700                                                                               | 0.746                                                                               | 0.746                                                                               |
| Reference                   | CPDB                                                                                | CPDB                                                                                | CPDB                                                                                |

### Model Applicability

Unknown features are fingerprint features in the query molecule, but not found in the training set.

- OPS PC20 out of range. Value: 4.0307. Training min, max, SD, explained variance: -4.3384, 3.4394, 1.14, 0.0162.
- Unknown ECFP\_2 feature: -597295171: [\*][c](:[\*]):[c](N=[\*]):c:[\*]
- Unknown ECFP\_2 feature: -1236953626: [\*]N([\*])[c](:[c]([\*]):[\*]):c:[\*]
- Unknown ECFP\_2 feature: 1483289300: [\*]N=C(C)/C(=[\*])[\*]
- Unknown ECFP\_2 feature: -661097313: [\*]CN(C(=[\*])[\*])[c](:[\*]):[\*]
- Unknown ECFP\_2 feature: -37698365: [\*]N([\*])CC(=[\*])[\*]

### Feature Contribution

#### Top features for positive contribution

| Fingerprint | Bit/Smiles | Feature Structure                                                                                  | Score |
|-------------|------------|----------------------------------------------------------------------------------------------------|-------|
| ECFP_6      | 655739385  | 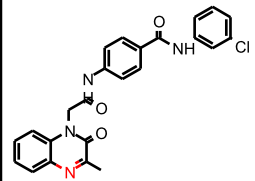<br>[*]:n:[*] | 0.229 |

|                                               |                   |                                                                                                                     |              |
|-----------------------------------------------|-------------------|---------------------------------------------------------------------------------------------------------------------|--------------|
| ECFP_6                                        | 1559650422        | 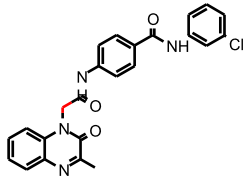<br>[*]C[*]                      | 0.203        |
| ECFP_6                                        | -817402818        | <br>[*]Cl                        | 0.129        |
| <b>Top Features for negative contribution</b> |                   |                                                                                                                     |              |
| <b>Fingerprint</b>                            | <b>Bit/Smiles</b> | <b>Feature Structure</b>                                                                                            | <b>Score</b> |
| ECFP_6                                        | 2106656448        | <br>[*]C(=O)[*]                  | -0.275       |
| ECFP_6                                        | 1996767644        | <br>[*][c](:[*]):[cH]:[cH]:[*] | -0.251       |
| ECFP_6                                        | 642810091         | <br>[*][c](:[*]):[*]           | -0.247       |



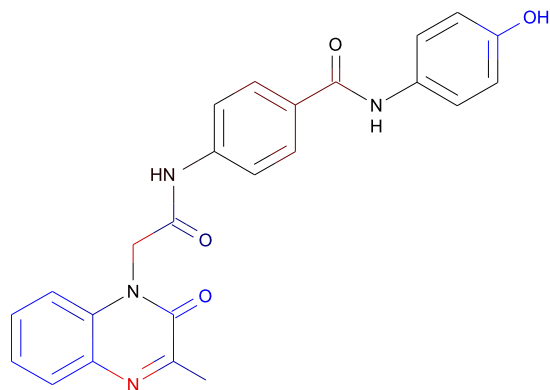
 $C_{24}H_{20}N_4O_4$ 

Molecular Weight: 428.44

ALogP: 2.218

Rotatable Bonds: 5

Acceptors: 5

Donors: 3

### Model Prediction

Prediction: 62.436

Unit: mg/kg\_body\_weight/day

Mahalanobis Distance: 13.204

Mahalanobis Distance p-value: 3.87e-008

Mahalanobis Distance: The Mahalanobis distance (MD) is a generalization of the Euclidean distance that accounts for correlations among the X properties. It is calculated as the distance to the center of the training data. The larger the MD, the less trustworthy the prediction.

Mahalanobis Distance p-value: The p-value gives the fraction of training data with an MD greater than or equal to the one for the given sample, assuming normally distributed data. The smaller the p-value, the less trustworthy the prediction. For highly non-normal X properties (e.g., fingerprints), the MD p-value is wildly inaccurate.

### Structural Similar Compounds

| Name                        | Ochratoxin A | 542     | Phenolphthalein |
|-----------------------------|--------------|---------|-----------------|
| Structure                   |              |         |                 |
| Actual Endpoint (-log C)    | 4.79932      | 4.79932 | 2.43468         |
| Predicted Endpoint (-log C) | 3.6353       | 3.6353  | 3.66084         |
| Distance                    | 0.668        | 0.668   | 0.755           |
| Reference                   | CPDB         | CPDB    | CPDB            |

### Model Applicability

Unknown features are fingerprint features in the query molecule, but not found in the training set.

1. All properties and OPS components are within expected ranges.
2. Unknown ECFP\_2 feature: -597295171: [\*][c](:[\*]):[c](N=[\*]):c:[\*]
3. Unknown ECFP\_2 feature: -1236953626: [\*]N([\*])[c](:[c]([\*]):[\*]):c:[\*]
4. Unknown ECFP\_2 feature: 1483289300: [\*]N=C(C)/C(=[\*])[\*]
5. Unknown ECFP\_2 feature: -661097313: [\*]CN(C(=[\*])[\*])[c](:[\*]):[\*]
6. Unknown ECFP\_2 feature: -37698365: [\*]N([\*])CC(=[\*])[\*]

### Feature Contribution

#### Top features for positive contribution

| Fingerprint | Bit/Smiles | Feature Structure | Score |
|-------------|------------|-------------------|-------|
| ECFP_6      | 655739385  | <br>[*]:n:[*]     | 0.229 |

|                                               |                   |                                                                                                                              |              |
|-----------------------------------------------|-------------------|------------------------------------------------------------------------------------------------------------------------------|--------------|
| ECFP_6                                        | 1559650422        | 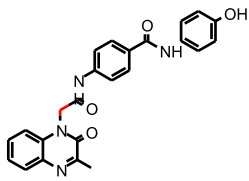<br>[*]C[*]                               | 0.203        |
| ECFP_6                                        | -175146122        | <br>[*]C(=[*])[c](:[cH]:[<br>*]):[cH]:[*] | 0.107        |
| <b>Top Features for negative contribution</b> |                   |                                                                                                                              |              |
| <b>Fingerprint</b>                            | <b>Bit/Smiles</b> | <b>Feature Structure</b>                                                                                                     | <b>Score</b> |
| ECFP_6                                        | 2106656448        | <br>[*]C(=O)[*]                           | -0.275       |
| ECFP_6                                        | 2019062761        | <br>[*]:[c](:[*])O                      | -0.258       |
| ECFP_6                                        | 1996767644        | <br>[*][c](:[*]):[cH]:[cH]<br>]:[*]     | -0.251       |



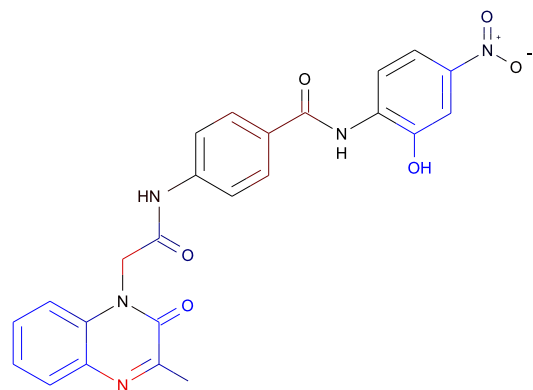
 $C_{24}H_{19}N_5O_6$ 

Molecular Weight: 473.43756

ALogP: 2.113

Rotatable Bonds: 6

Acceptors: 7

Donors: 3

### Model Prediction

Prediction: 111.609

Unit: mg/kg\_body\_weight/day

Mahalanobis Distance: 14.728

Mahalanobis Distance p-value: 2.85e-012

Mahalanobis Distance: The Mahalanobis distance (MD) is a generalization of the Euclidean distance that accounts for correlations among the X properties. It is calculated as the distance to the center of the training data. The larger the MD, the less trustworthy the prediction.

Mahalanobis Distance p-value: The p-value gives the fraction of training data with an MD greater than or equal to the one for the given sample, assuming normally distributed data. The smaller the p-value, the less trustworthy the prediction. For highly non-normal X properties (e.g., fingerprints), the MD p-value is wildly inaccurate.

### Structural Similar Compounds

| Name                        | Salicylazosulfapyridine | Ochratoxin A | 542     |
|-----------------------------|-------------------------|--------------|---------|
| Structure                   |                         |              |         |
| Actual Endpoint (-log C)    | 2.5034                  | 4.79932      | 4.79932 |
| Predicted Endpoint (-log C) | 3.54214                 | 3.6353       | 3.6353  |
| Distance                    | 0.678                   | 0.743        | 0.743   |
| Reference                   | CPDB                    | CPDB         | CPDB    |

### Model Applicability

Unknown features are fingerprint features in the query molecule, but not found in the training set.

1. All properties and OPS components are within expected ranges.
2. Unknown ECFP\_2 feature: -597295171: [\*][c](:[\*]):[c](N=[\*]):c:[\*]
3. Unknown ECFP\_2 feature: -1236953626: [\*]N([\*])[c](:[c]([\*]):[\*]):c:[\*]
4. Unknown ECFP\_2 feature: 1483289300: [\*]N=C(C)/C(=[\*])[\*]
5. Unknown ECFP\_2 feature: -661097313: [\*]CN(C(=[\*])[\*])[c](:[\*]):[\*]
6. Unknown ECFP\_2 feature: -37698365: [\*]N([\*])CC(=[\*])[\*]

### Feature Contribution

#### Top features for positive contribution

| Fingerprint | Bit/Smiles | Feature Structure | Score |
|-------------|------------|-------------------|-------|
| ECFP_6      | 655739385  | <br>[*]:n:[*]     | 0.229 |

|                                               |                   |                                                                                                                                       |              |
|-----------------------------------------------|-------------------|---------------------------------------------------------------------------------------------------------------------------------------|--------------|
| ECFP_6                                        | 1559650422        | 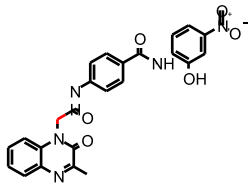<br><chem>[*]C[*]</chem>                           | 0.203        |
| ECFP_6                                        | -175146122        | <br><chem>[*]C(=[*])[c](:[cH]:[*]):[cH]:[*]</chem> | 0.107        |
| <b>Top Features for negative contribution</b> |                   |                                                                                                                                       |              |
| <b>Fingerprint</b>                            | <b>Bit/Smiles</b> | <b>Feature Structure</b>                                                                                                              | <b>Score</b> |
| ECFP_6                                        | 2106656448        | <br><chem>[*]C(=O)[*]</chem>                       | -0.275       |
| ECFP_6                                        | 2019062761        | <br><chem>[*]:[c](:[*])O</chem>                  | -0.258       |
| ECFP_6                                        | 1996767644        | <br><chem>[*][c](:[*]):[cH]:[cH]:[*]</chem>      | -0.251       |





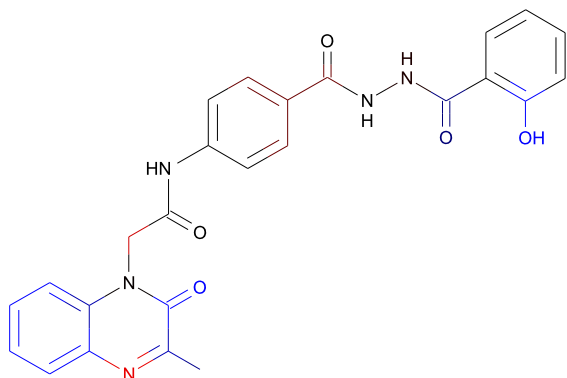
 $C_{25}H_{21}N_5O_5$ 

Molecular Weight: 471.46474

ALogP: 1.475

Rotatable Bonds: 6

Acceptors: 6

Donors: 4

### Model Prediction

Prediction: 56.955

Unit: mg/kg\_body\_weight/day

Mahalanobis Distance: 13.274

Mahalanobis Distance p-value: 2.59e-008

Mahalanobis Distance: The Mahalanobis distance (MD) is a generalization of the Euclidean distance that accounts for correlations among the X properties. It is calculated as the distance to the center of the training data. The larger the MD, the less trustworthy the prediction.

Mahalanobis Distance p-value: The p-value gives the fraction of training data with an MD greater than or equal to the one for the given sample, assuming normally distributed data. The smaller the p-value, the less trustworthy the prediction. For highly non-normal X properties (e.g., fingerprints), the MD p-value is wildly inaccurate.

### Structural Similar Compounds

| Name                        | Salicylazosulfapyridine | Ochratoxin A | 542     |
|-----------------------------|-------------------------|--------------|---------|
| Structure                   |                         |              |         |
| Actual Endpoint (-log C)    | 2.5034                  | 4.79932      | 4.79932 |
| Predicted Endpoint (-log C) | 3.54214                 | 3.6353       | 3.6353  |
| Distance                    | 0.732                   | 0.736        | 0.736   |
| Reference                   | CPDB                    | CPDB         | CPDB    |

### Model Applicability

Unknown features are fingerprint features in the query molecule, but not found in the training set.

1. All properties and OPS components are within expected ranges.
2. Unknown ECFP\_2 feature: -597295171: [\*][c](:[\*]):[c](N=[\*]):c:[\*]
3. Unknown ECFP\_2 feature: -1236953626: [\*]N([\*])[c](:[c]([\*]):[\*]):c:[\*]
4. Unknown ECFP\_2 feature: 1483289300: [\*]N=C(\C)/C(=[\*])[\*]
5. Unknown ECFP\_2 feature: -661097313: [\*]CN(C(=[\*])[\*])[c](:[\*]):[\*]
6. Unknown ECFP\_2 feature: -37698365: [\*]N([\*])CC(=[\*])[\*]

### Feature Contribution

#### Top features for positive contribution

| Fingerprint | Bit/Smiles | Feature Structure | Score |
|-------------|------------|-------------------|-------|
| ECFP_6      | 655739385  | <br>[*]:n:[*]     | 0.229 |

|                                               |                   |                                                                                                                              |              |
|-----------------------------------------------|-------------------|------------------------------------------------------------------------------------------------------------------------------|--------------|
| ECFP_6                                        | 1559650422        | 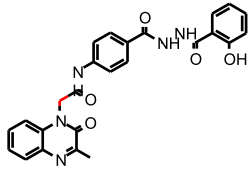<br>[*]C[*]                               | 0.203        |
| ECFP_6                                        | -175146122        | <br>[*]C(=[*])[c](:[cH]:[<br>*]):[cH]:[*] | 0.107        |
| <b>Top Features for negative contribution</b> |                   |                                                                                                                              |              |
| <b>Fingerprint</b>                            | <b>Bit/Smiles</b> | <b>Feature Structure</b>                                                                                                     | <b>Score</b> |
| ECFP_6                                        | 2106656448        | <br>[*]C(=O)[*]                           | -0.275       |
| ECFP_6                                        | 2019062761        | <br>[*]:[c](:[*])O                      | -0.258       |
| ECFP_6                                        | 1996767644        | <br>[*][c](:[*]):[cH]:[cH]<br>]:[*]     | -0.251       |



# Sorafenib

# TOPKAT\_Carcinogenic\_Potency\_TD50\_Mouse

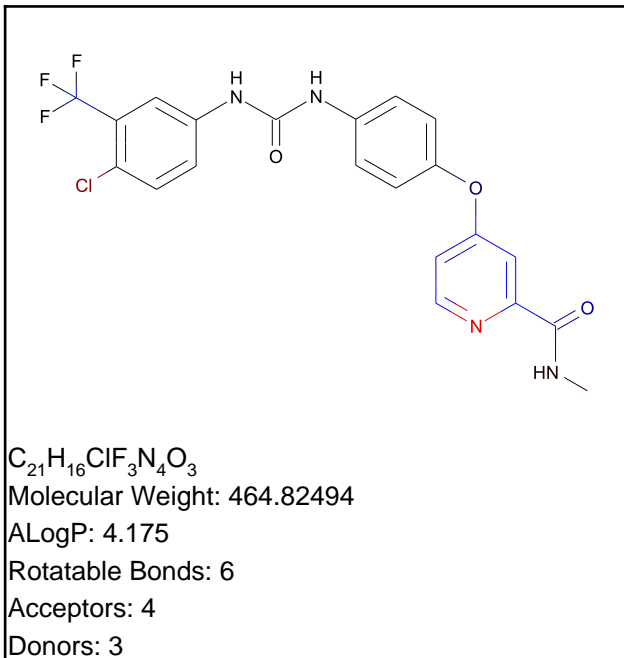

## Model Prediction

Prediction: 19.236

Unit: mg/kg\_body\_weight/day

Mahalanobis Distance: 12.401

Mahalanobis Distance p-value: 2.94e-006

Mahalanobis Distance: The Mahalanobis distance (MD) is a generalization of the Euclidean distance that accounts for correlations among the X properties. It is calculated as the distance to the center of the training data. The larger the MD, the less trustworthy the prediction.

Mahalanobis Distance p-value: The p-value gives the fraction of training data with an MD greater than or equal to the one for the given sample, assuming normally distributed data. The smaller the p-value, the less trustworthy the prediction. For highly non-normal X properties (e.g., fingerprints), the MD p-value is wildly inaccurate.

## Structural Similar Compounds

| Name                        | Ochratoxin A                                                                        | 542                                                                                 | 4-Chloro-6-(2,3-xylylidino)-2-pyridinylthio(N-b-hydroxy-ethyl) acetamide            |
|-----------------------------|-------------------------------------------------------------------------------------|-------------------------------------------------------------------------------------|-------------------------------------------------------------------------------------|
| Structure                   | 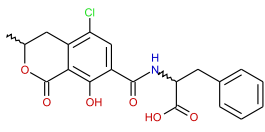 |  |  |
| Actual Endpoint (-log C)    | 4.79932                                                                             | 4.79932                                                                             | 3.91517                                                                             |
| Predicted Endpoint (-log C) | 3.6353                                                                              | 3.6353                                                                              | 3.92186                                                                             |
| Distance                    | 0.718                                                                               | 0.718                                                                               | 0.738                                                                               |
| Reference                   | CPDB                                                                                | CPDB                                                                                | CPDB                                                                                |

## Model Applicability

Unknown features are fingerprint features in the query molecule, but not found in the training set.

1. All properties and OPS components are within expected ranges.
2. Unknown ECFP\_2 feature: 1413420509: [\*]C(=[\*])[c](:n:[\*]):c:[\*]
3. Unknown ECFP\_2 feature: 1338334141: [\*]C(=[\*])NC

## Feature Contribution

### Top features for positive contribution

| Fingerprint | Bit/Smiles | Feature Structure                                                                                  | Score |
|-------------|------------|----------------------------------------------------------------------------------------------------|-------|
| ECFP_6      | 655739385  | 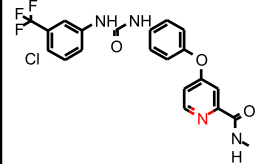<br>[*]:n:[*] | 0.229 |

|        |            |                                                                                                                        |       |
|--------|------------|------------------------------------------------------------------------------------------------------------------------|-------|
| ECFP_6 | -817402818 | 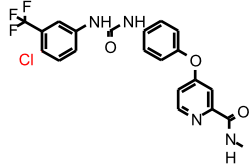<br>[*]Cl                           | 0.129 |
| ECFP_6 | -176455838 | <br>[*]O[c](:[cH]:[*]):[c<br>H]:[*] | 0.082 |

**Top Features for negative contribution**

| Fingerprint | Bit/Smiles | Feature Structure                                                                                                     | Score  |
|-------------|------------|-----------------------------------------------------------------------------------------------------------------------|--------|
| ECFP_6      | 1996767644 | 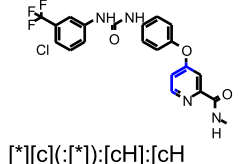<br>[*][c](:[*]):[cH]:[cH<br>]:[*] | -0.251 |
| ECFP_6      | 642810091  | <br>[*][c](:[*]):[*]             | -0.247 |
| ECFP_6      | -182236392 | <br>[*]:[cH]:[*]                 | -0.232 |



15a

TOPKAT\_Carcinogenic\_Potency\_TD50\_Rat

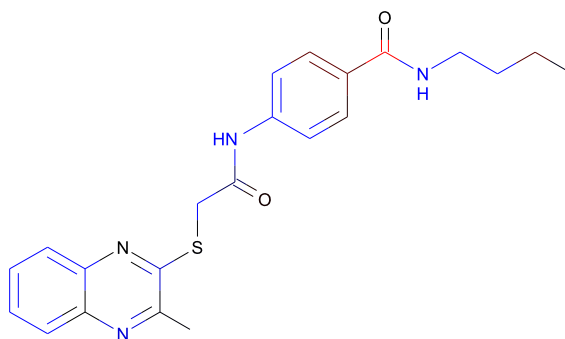C<sub>22</sub>H<sub>24</sub>N<sub>4</sub>O<sub>2</sub>S

Molecular Weight: 408.51656

ALogP: 3.83

Rotatable Bonds: 8

Acceptors: 5

Donors: 2

### Model Prediction

Prediction: 187.702

Unit: mg/kg\_body\_weight/day

Mahalanobis Distance: 17.700

Mahalanobis Distance p-value: 3.71e-020

Mahalanobis Distance: The Mahalanobis distance (MD) is a generalization of the Euclidean distance that accounts for correlations among the X properties. It is calculated as the distance to the center of the training data. The larger the MD, the less trustworthy the prediction.

Mahalanobis Distance p-value: The p-value gives the fraction of training data with an MD greater than or equal to the one for the given sample, assuming normally distributed data. The smaller the p-value, the less trustworthy the prediction. For highly non-normal X properties (e.g., fingerprints), the MD p-value is wildly inaccurate.

### Structural Similar Compounds

| Name                        | Fluvastatin | 913     | 4-Chloro-6-(2,3-xylylidino)-2-pyrimidinylthio(N-b-hydroxy-ethyl) acetamide |
|-----------------------------|-------------|---------|----------------------------------------------------------------------------|
| Structure                   |             |         |                                                                            |
| Actual Endpoint (-log C)    | 3.51742     | 3.51742 | 4.75226                                                                    |
| Predicted Endpoint (-log C) | 5.41573     | 5.41573 | 3.29421                                                                    |
| Distance                    | 0.593       | 0.593   | 0.633                                                                      |
| Reference                   | CPDB        | CPDB    | CPDB                                                                       |

### Model Applicability

Unknown features are fingerprint features in the query molecule, but not found in the training set.

- All properties and OPS components are within expected ranges.

### Feature Contribution

#### Top features for positive contribution

| Fingerprint | Bit/Smiles | Feature Structure | Score |
|-------------|------------|-------------------|-------|
| FCFP_6      | 1          | <br>[*]=O         | 0.234 |



|                                               |                   |                                                                                                                                           |              |
|-----------------------------------------------|-------------------|-------------------------------------------------------------------------------------------------------------------------------------------|--------------|
| FCFP_6                                        | -885550502        | 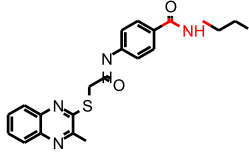<br><chem>[*]CNC(=[*])[*]</chem>                       | 0.229        |
| FCFP_6                                        | 203677720         | <br><chem>[*]C(=[*])[c](:[cH]:[ *]):[cH]:[*]</chem>    | 0.137        |
| <b>Top Features for negative contribution</b> |                   |                                                                                                                                           |              |
| <b>Fingerprint</b>                            | <b>Bit/Smiles</b> | <b>Feature Structure</b>                                                                                                                  | <b>Score</b> |
| FCFP_6                                        | -1272709286       | <br><chem>[*]CCN[*]</chem>                             | -0.526       |
| FCFP_6                                        | 991735244         | <br><chem>[*]:[c]1:[*]:[cH]:[cH] :[cH]:[cH]:1</chem> | -0.422       |
| FCFP_6                                        | 16                | <br><chem>[*][c](:[*]):[*]</chem>                    | -0.354       |



15b

TOPKAT\_Carcinogenic\_Potency\_TD50\_Rat

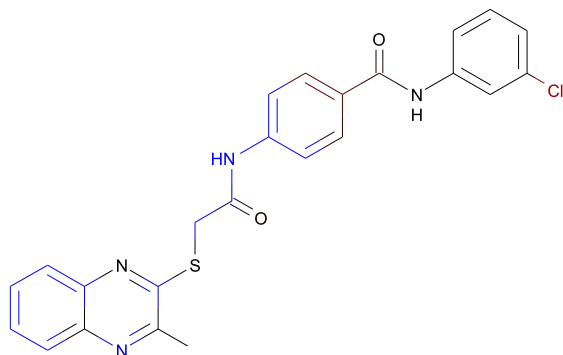C<sub>24</sub>H<sub>19</sub>ClN<sub>4</sub>O<sub>2</sub>S

Molecular Weight: 462.95126

ALogP: 4.743

Rotatable Bonds: 6

Acceptors: 5

Donors: 2

### Model Prediction

Prediction: 25.425

Unit: mg/kg\_body\_weight/day

Mahalanobis Distance: 16.964

Mahalanobis Distance p-value: 1.58e-017

Mahalanobis Distance: The Mahalanobis distance (MD) is a generalization of the Euclidean distance that accounts for correlations among the X properties. It is calculated as the distance to the center of the training data. The larger the MD, the less trustworthy the prediction.

Mahalanobis Distance p-value: The p-value gives the fraction of training data with an MD greater than or equal to the one for the given sample, assuming normally distributed data. The smaller the p-value, the less trustworthy the prediction. For highly non-normal X properties (e.g., fingerprints), the MD p-value is wildly inaccurate.

### Structural Similar Compounds

| Name                        | Fluvastatin | 913     | Indomethacin |
|-----------------------------|-------------|---------|--------------|
| Structure                   |             |         |              |
| Actual Endpoint (-log C)    | 3.51742     | 3.51742 | 5.49293      |
| Predicted Endpoint (-log C) | 5.41573     | 5.41573 | 4.9569       |
| Distance                    | 0.672       | 0.672   | 0.711        |
| Reference                   | CPDB        | CPDB    | CPDB         |

### Model Applicability

Unknown features are fingerprint features in the query molecule, but not found in the training set.

- OPS PC16 out of range. Value: -3.695. Training min, max, SD, explained variance: -3.6111, 5.345, 1.406, 0.0190.

### Feature Contribution

#### Top features for positive contribution

| Fingerprint | Bit/Smiles | Feature Structure | Score |
|-------------|------------|-------------------|-------|
| FCFP_6      | 1          | <br>[*]=O         | 0.234 |

|                                               |                   |                                                                                                                               |              |
|-----------------------------------------------|-------------------|-------------------------------------------------------------------------------------------------------------------------------|--------------|
| FCFP_6                                        | 32                | 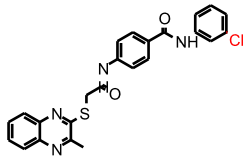<br>[*]Cl                                  | 0.154        |
| FCFP_6                                        | 203677720         | <br>[*]C(=[*])[c](:[cH]:[<br>*]):[cH]:[*]  | 0.137        |
| <b>Top Features for negative contribution</b> |                   |                                                                                                                               |              |
| <b>Fingerprint</b>                            | <b>Bit/Smiles</b> | <b>Feature Structure</b>                                                                                                      | <b>Score</b> |
| FCFP_6                                        | 991735244         | <br>[*]:[c]1:[*]:[cH]:[cH<br>]:[cH]:[cH]:1 | -0.422       |
| FCFP_6                                        | 16                | <br>[*][c](:[*]):[*]                     | -0.354       |
| FCFP_6                                        | 590925877         | <br>[*]N[c](:[cH]:[*]):[c<br>H]:[*]      | -0.323       |



15c

TOPKAT\_Carcinogenic\_Potency\_TD50\_Rat

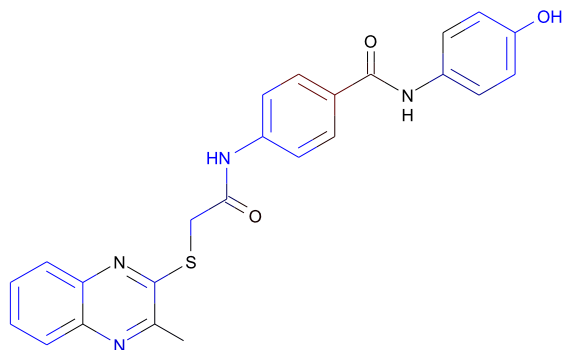C<sub>24</sub>H<sub>20</sub>N<sub>4</sub>O<sub>3</sub>S

Molecular Weight: 444.5056

ALogP: 3.836

Rotatable Bonds: 6

Acceptors: 6

Donors: 3

### Model Prediction

Prediction: 210.252

Unit: mg/kg\_body\_weight/day

Mahalanobis Distance: 16.933

Mahalanobis Distance p-value: 2.03e-017

Mahalanobis Distance: The Mahalanobis distance (MD) is a generalization of the Euclidean distance that accounts for correlations among the X properties. It is calculated as the distance to the center of the training data. The larger the MD, the less trustworthy the prediction.

Mahalanobis Distance p-value: The p-value gives the fraction of training data with an MD greater than or equal to the one for the given sample, assuming normally distributed data. The smaller the p-value, the less trustworthy the prediction. For highly non-normal X properties (e.g., fingerprints), the MD p-value is wildly inaccurate.

### Structural Similar Compounds

| Name                        | 913     | Fluvastatin | 4-Bis(2-hydroxyethyl)amino-2-(5-nitro-2-thienyl)quinazoline |
|-----------------------------|---------|-------------|-------------------------------------------------------------|
| Structure                   |         |             |                                                             |
| Actual Endpoint (-log C)    | 3.51742 | 3.51742     | 5.05984                                                     |
| Predicted Endpoint (-log C) | 5.41573 | 5.41573     | 4.23808                                                     |
| Distance                    | 0.709   | 0.709       | 0.716                                                       |
| Reference                   | CPDB    | CPDB        | CPDB                                                        |

### Model Applicability

Unknown features are fingerprint features in the query molecule, but not found in the training set.

1. All properties and OPS components are within expected ranges.

### Feature Contribution

#### Top features for positive contribution

| Fingerprint | Bit/Smiles | Feature Structure | Score |
|-------------|------------|-------------------|-------|
| FCFP_6      | 1          | <br>[*]=O         | 0.234 |

|                                               |                   |                                                                                                                                       |              |
|-----------------------------------------------|-------------------|---------------------------------------------------------------------------------------------------------------------------------------|--------------|
| FCFP_6                                        | 203677720         | 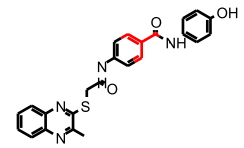<br><chem>[*]C(=[*])[c](:[cH]:[*]):[cH]:[*]</chem> | 0.137        |
| FCFP_6                                        | -1272768868       | <br><chem>[*]SCC(=[*])[*]</chem>                   | 0.127        |
| <b>Top Features for negative contribution</b> |                   |                                                                                                                                       |              |
| <b>Fingerprint</b>                            | <b>Bit/Smiles</b> | <b>Feature Structure</b>                                                                                                              | <b>Score</b> |
| FCFP_6                                        | 991735244         | <br><chem>[*]:[c]1:[*]:[cH]:[cH][cH]:[cH]:1</chem> | -0.422       |
| FCFP_6                                        | 7                 | <br><chem>[*]O</chem>                            | -0.372       |
| FCFP_6                                        | 16                | <br><chem>[*][c](:[*]):[*]</chem>                | -0.354       |





15d

TOPKAT\_Carcinogenic\_Potency\_TD50\_Rat

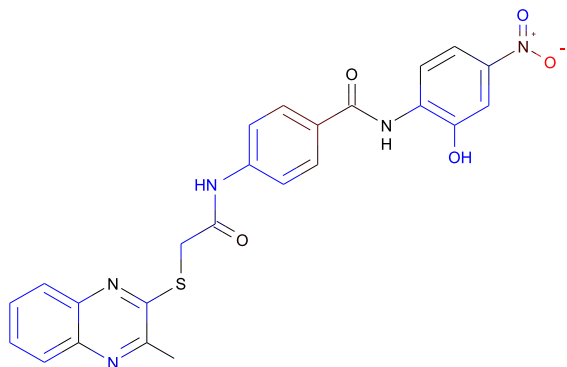C<sub>24</sub>H<sub>19</sub>N<sub>5</sub>O<sub>5</sub>S

Molecular Weight: 489.50316

ALogP: 3.731

Rotatable Bonds: 7

Acceptors: 8

Donors: 3

### Model Prediction

Prediction: 76.496

Unit: mg/kg\_body\_weight/day

Mahalanobis Distance: 20.119

Mahalanobis Distance p-value: 1.51e-029

Mahalanobis Distance: The Mahalanobis distance (MD) is a generalization of the Euclidean distance that accounts for correlations among the X properties. It is calculated as the distance to the center of the training data. The larger the MD, the less trustworthy the prediction.

Mahalanobis Distance p-value: The p-value gives the fraction of training data with an MD greater than or equal to the one for the given sample, assuming normally distributed data. The smaller the p-value, the less trustworthy the prediction. For highly non-normal X properties (e.g., fingerprints), the MD p-value is wildly inaccurate.

### Structural Similar Compounds

| Name                        | 623     | 4-Bis(2-hydroxyethyl)amino-2-(5-nitro-2-thienyl)quinazoline | Salicylazosulfapyridine |
|-----------------------------|---------|-------------------------------------------------------------|-------------------------|
| Structure                   |         |                                                             |                         |
| Actual Endpoint (-log C)    | 2.39985 | 5.05984                                                     | 2.39891                 |
| Predicted Endpoint (-log C) | 3.4177  | 4.23808                                                     | 3.17598                 |
| Distance                    | 0.673   | 0.749                                                       | 0.786                   |
| Reference                   | CPDB    | CPDB                                                        | CPDB                    |

### Model Applicability

Unknown features are fingerprint features in the query molecule, but not found in the training set.

1. All properties and OPS components are within expected ranges.

### Feature Contribution

#### Top features for positive contribution

| Fingerprint | Bit/Smiles | Feature Structure | Score |
|-------------|------------|-------------------|-------|
| FCFP_6      | 5          |                   | 0.431 |

|                                               |                   |                                                                                                                                |              |
|-----------------------------------------------|-------------------|--------------------------------------------------------------------------------------------------------------------------------|--------------|
| FCFP_6                                        | 8                 | 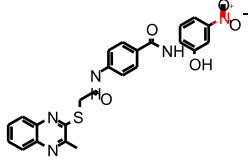<br>[*][N+](=[*])[*]                        | 0.336        |
| FCFP_6                                        | 1                 | <br>[*]=O                                   | 0.234        |
| <b>Top Features for negative contribution</b> |                   |                                                                                                                                |              |
| <b>Fingerprint</b>                            | <b>Bit/Smiles</b> | <b>Feature Structure</b>                                                                                                       | <b>Score</b> |
| FCFP_6                                        | 991735244         | <br>[*]:[c]1:[*]:[cH]:[cH]<br>]:[cH]:[cH]:1 | -0.422       |
| FCFP_6                                        | 7                 | <br>[*]O                                  | -0.372       |
| FCFP_6                                        | 16                | <br>[*][c](:[*]):[*]                      | -0.354       |



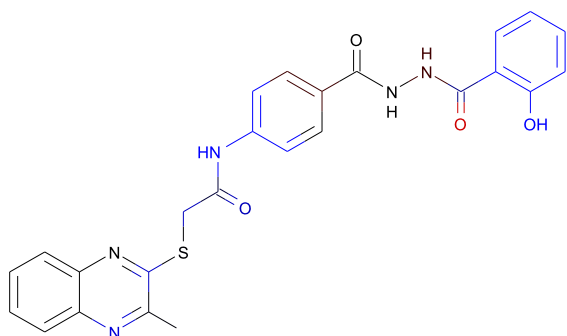
 $C_{25}H_{21}N_5O_4S$ 

Molecular Weight: 487.53034

ALogP: 3.093

Rotatable Bonds: 7

Acceptors: 7

Donors: 4

### Model Prediction

Prediction: 249.201

Unit: mg/kg\_body\_weight/day

Mahalanobis Distance: 17.086

Mahalanobis Distance p-value: 5.91e-018

Mahalanobis Distance: The Mahalanobis distance (MD) is a generalization of the Euclidean distance that accounts for correlations among the X properties. It is calculated as the distance to the center of the training data. The larger the MD, the less trustworthy the prediction.

Mahalanobis Distance p-value: The p-value gives the fraction of training data with an MD greater than or equal to the one for the given sample, assuming normally distributed data. The smaller the p-value, the less trustworthy the prediction. For highly non-normal X properties (e.g., fingerprints), the MD p-value is wildly inaccurate.

### Structural Similar Compounds

| Name                        | Salicylazosulfapyridine | 4-Bis(2-hydroxyethyl)amino-2-(5-nitro-2-thienyl)quinazoline | Ochratoxin A |
|-----------------------------|-------------------------|-------------------------------------------------------------|--------------|
| Structure                   |                         |                                                             |              |
| Actual Endpoint (-log C)    | 2.39891                 | 5.05984                                                     | 6.47264      |
| Predicted Endpoint (-log C) | 3.17598                 | 4.23808                                                     | 5.06501      |
| Distance                    | 0.779                   | 0.798                                                       | 0.814        |
| Reference                   | CPDB                    | CPDB                                                        | CPDB         |

### Model Applicability

Unknown features are fingerprint features in the query molecule, but not found in the training set.

- All properties and OPS components are within expected ranges.

### Feature Contribution

#### Top features for positive contribution

| Fingerprint | Bit/Smiles | Feature Structure | Score |
|-------------|------------|-------------------|-------|
| FCFP_6      | 1          | <p>[*]=O</p>      | 0.234 |

|                                               |                   |                                                                                                                                          |              |
|-----------------------------------------------|-------------------|------------------------------------------------------------------------------------------------------------------------------------------|--------------|
| FCFP_6                                        | 203677720         | 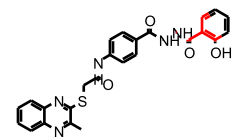<br><chem>[*]C(=[*])[c](:[cH]:[*] ):[cH]:[*]</chem>   | 0.137        |
| FCFP_6                                        | -1272768868       | <br><chem>[*]SCC(=[*])[*]</chem>                      | 0.127        |
| <b>Top Features for negative contribution</b> |                   |                                                                                                                                          |              |
| <b>Fingerprint</b>                            | <b>Bit/Smiles</b> | <b>Feature Structure</b>                                                                                                                 | <b>Score</b> |
| FCFP_6                                        | 991735244         | <br><chem>[*]:[c]1:[*]:[cH]:[cH] ]:[cH]:[cH]:1</chem> | -0.422       |
| FCFP_6                                        | 7                 | <br><chem>[*]O</chem>                               | -0.372       |
| FCFP_6                                        | 16                | <br><chem>[*][c](:[*]):[*]</chem>                   | -0.354       |



17a

TOPKAT\_Carcinogenic\_Potency\_TD50\_Rat

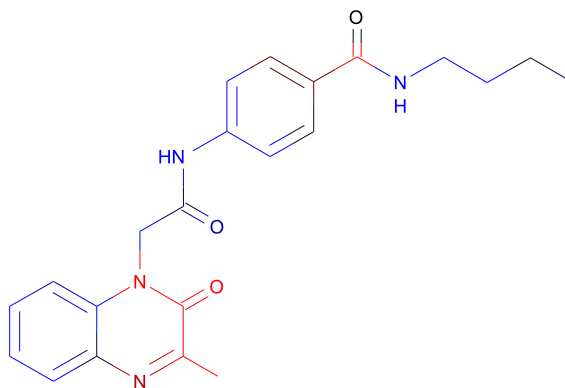C<sub>22</sub>H<sub>24</sub>N<sub>4</sub>O<sub>3</sub>

Molecular Weight: 392.45096

ALogP: 2.212

Rotatable Bonds: 7

Acceptors: 4

Donors: 2

### Model Prediction

Prediction: 51.930

Unit: mg/kg\_body\_weight/day

Mahalanobis Distance: 17.563

Mahalanobis Distance p-value: 1.17e-019

Mahalanobis Distance: The Mahalanobis distance (MD) is a generalization of the Euclidean distance that accounts for correlations among the X properties. It is calculated as the distance to the center of the training data. The larger the MD, the less trustworthy the prediction.

Mahalanobis Distance p-value: The p-value gives the fraction of training data with an MD greater than or equal to the one for the given sample, assuming normally distributed data. The smaller the p-value, the less trustworthy the prediction. For highly non-normal X properties (e.g., fingerprints), the MD p-value is wildly inaccurate.

### Structural Similar Compounds

| Name                        | Loxidine | 4,4'-Sulfonylbisacetanilide | 542     |
|-----------------------------|----------|-----------------------------|---------|
| Structure                   |          |                             |         |
| Actual Endpoint (-log C)    | 2.87532  | 3.77655                     | 6.59334 |
| Predicted Endpoint (-log C) | 3.63996  | 3.55337                     | 5.06501 |
| Distance                    | 0.593    | 0.599                       | 0.663   |
| Reference                   | CPDB     | CPDB                        | CPDB    |

### Model Applicability

Unknown features are fingerprint features in the query molecule, but not found in the training set.

1. All properties and OPS components are within expected ranges.

### Feature Contribution

#### Top features for positive contribution

| Fingerprint | Bit/Smiles | Feature Structure                           | Score |
|-------------|------------|---------------------------------------------|-------|
| FCFP_6      | 565998553  | <br><chem>[*]N(*)C(=O)C(=O)C(=O)N[*]</chem> | 0.357 |

|                                               |                   |                                                                                                                                                |              |
|-----------------------------------------------|-------------------|------------------------------------------------------------------------------------------------------------------------------------------------|--------------|
| FCFP_6                                        | 565968762         | 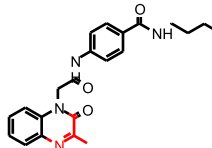<br><chem>[*]N=C(C)C(=[*])[*]</chem>                        | 0.266        |
| FCFP_6                                        | -2090462286       | <br><chem>[*]N([*])[c]1:[cH]:[cH]:[cH]:[cH]:[c]:1[*]</chem> | 0.245        |
| <b>Top Features for negative contribution</b> |                   |                                                                                                                                                |              |
| <b>Fingerprint</b>                            | <b>Bit/Smiles</b> | <b>Feature Structure</b>                                                                                                                       | <b>Score</b> |
| FCFP_6                                        | -1272709286       | <br><chem>[*]CCN[*]</chem>                                  | -0.526       |
| FCFP_6                                        | 991735244         | <br><chem>[*]:[c]1:[*]:[cH]:[cH]:[cH]:[cH]:1</chem>       | -0.422       |
| FCFP_6                                        | 16                | <br><chem>[*][c](:[*]):[*]</chem>                         | -0.354       |





17b

TOPKAT\_Carcinogenic\_Potency\_TD50\_Rat

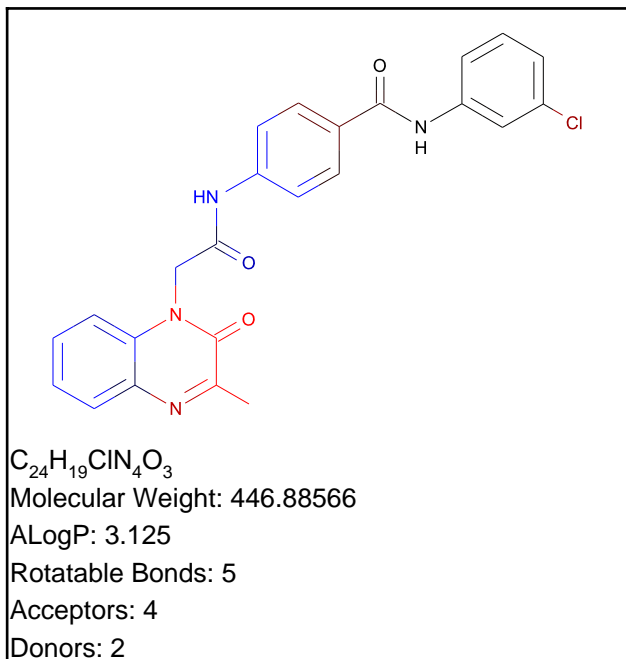

### Model Prediction

Prediction: 6.023

Unit: mg/kg\_body\_weight/day

Mahalanobis Distance: 16.376

Mahalanobis Distance p-value: 1.61e-015

Mahalanobis Distance: The Mahalanobis distance (MD) is a generalization of the Euclidean distance that accounts for correlations among the X properties. It is calculated as the distance to the center of the training data. The larger the MD, the less trustworthy the prediction.

Mahalanobis Distance p-value: The p-value gives the fraction of training data with an MD greater than or equal to the one for the given sample, assuming normally distributed data. The smaller the p-value, the less trustworthy the prediction. For highly non-normal X properties (e.g., fingerprints), the MD p-value is wildly inaccurate.

### Structural Similar Compounds

| Name                        | 3-(Cyclopentyloxy)-N-(3,5-dichloro-4-pyridyl)-4-methoxybenzamide | Indomethacin | Fluvastatin |
|-----------------------------|------------------------------------------------------------------|--------------|-------------|
| Structure                   |                                                                  |              |             |
| Actual Endpoint (-log C)    | 5.39369                                                          | 5.49293      | 3.51742     |
| Predicted Endpoint (-log C) | 4.27874                                                          | 4.9569       | 5.41573     |
| Distance                    | 0.682                                                            | 0.683        | 0.687       |
| Reference                   | CPDB                                                             | CPDB         | CPDB        |

### Model Applicability

Unknown features are fingerprint features in the query molecule, but not found in the training set.

- OPS PC20 out of range. Value: 6.7989. Training min, max, SD, explained variance: -3.9266, 5.5565, 1.236, 0.0147.

### Feature Contribution

#### Top features for positive contribution

| Fingerprint | Bit/Smiles | Feature Structure                           | Score |
|-------------|------------|---------------------------------------------|-------|
| FCFP_6      | 565998553  | <br><chem>[*]N(*)C(=O)C(=O)C(=O)N[*]</chem> | 0.357 |

|                                               |                   |                                                                                                                                                |              |
|-----------------------------------------------|-------------------|------------------------------------------------------------------------------------------------------------------------------------------------|--------------|
| FCFP_6                                        | 565968762         | 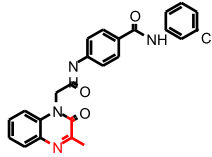<br><chem>[*]N=C(C)C(=[*])[*]</chem>                        | 0.266        |
| FCFP_6                                        | -2090462286       | <br><chem>[*]N([*])[c]1:[cH]:[cH]:[cH]:[cH]:[c]:1[*]</chem> | 0.245        |
| <b>Top Features for negative contribution</b> |                   |                                                                                                                                                |              |
| <b>Fingerprint</b>                            | <b>Bit/Smiles</b> | <b>Feature Structure</b>                                                                                                                       | <b>Score</b> |
| FCFP_6                                        | 991735244         | <br><chem>[*]:[c]1:[*]:[cH]:[cH]:[cH]:[cH]:1</chem>         | -0.422       |
| FCFP_6                                        | 16                | <br><chem>[*][c](:[*]):[*]</chem>                         | -0.354       |
| FCFP_6                                        | 590925877         | <br><chem>[*]N[c](:[cH]:[*]):[cH]:[*]</chem>              | -0.323       |



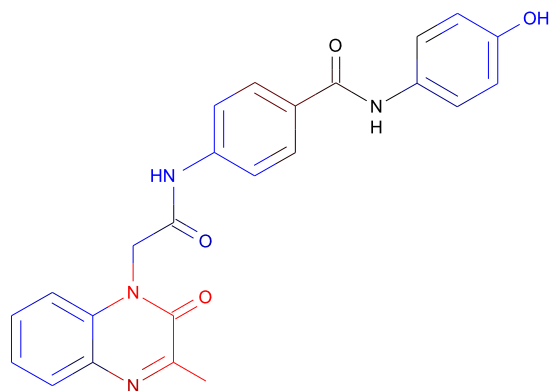
 $C_{24}H_{20}N_4O_4$ 

Molecular Weight: 428.44

ALogP: 2.218

Rotatable Bonds: 5

Acceptors: 5

Donors: 3

### Model Prediction

Prediction: 49.731

Unit: mg/kg\_body\_weight/day

Mahalanobis Distance: 16.423

Mahalanobis Distance p-value: 1.13e-015

Mahalanobis Distance: The Mahalanobis distance (MD) is a generalization of the Euclidean distance that accounts for correlations among the X properties. It is calculated as the distance to the center of the training data. The larger the MD, the less trustworthy the prediction.

Mahalanobis Distance p-value: The p-value gives the fraction of training data with an MD greater than or equal to the one for the given sample, assuming normally distributed data. The smaller the p-value, the less trustworthy the prediction. For highly non-normal X properties (e.g., fingerprints), the MD p-value is wildly inaccurate.

### Structural Similar Compounds

| Name                        | Ochratoxin A | 542     | Salicylazosulfapyridine |
|-----------------------------|--------------|---------|-------------------------|
| Structure                   |              |         |                         |
| Actual Endpoint (-log C)    | 6.47264      | 6.59334 | 2.39891                 |
| Predicted Endpoint (-log C) | 5.06501      | 5.06501 | 3.17598                 |
| Distance                    | 0.639        | 0.639   | 0.712                   |
| Reference                   | CPDB         | CPDB    | CPDB                    |

### Model Applicability

Unknown features are fingerprint features in the query molecule, but not found in the training set.

- OPS PC20 out of range. Value: 6.2813. Training min, max, SD, explained variance: -3.9266, 5.5565, 1.236, 0.0147.

### Feature Contribution

#### Top features for positive contribution

| Fingerprint | Bit/Smiles | Feature Structure              | Score |
|-------------|------------|--------------------------------|-------|
| FCFP_6      | 565998553  | <br>[*]N[*]C(=O)C(=[*])<br>[*] | 0.357 |

|                                               |                   |                                                                                                                                              |              |
|-----------------------------------------------|-------------------|----------------------------------------------------------------------------------------------------------------------------------------------|--------------|
| FCFP_6                                        | 565968762         | 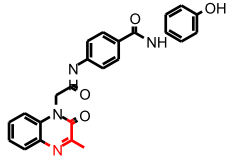<br><chem>[*]N=C(C)C(=O)N[*]</chem>                       | 0.266        |
| FCFP_6                                        | -2090462286       | <br><chem>[*]N([*])C1:[cH]:[cH]:[cH]:[cH]:[c]:1[*]</chem> | 0.245        |
| <b>Top Features for negative contribution</b> |                   |                                                                                                                                              |              |
| <b>Fingerprint</b>                            | <b>Bit/Smiles</b> | <b>Feature Structure</b>                                                                                                                     | <b>Score</b> |
| FCFP_6                                        | 991735244         | <br><chem>[*]:[c]1:[*]:[cH]:[cH]:[cH]:[cH]:1</chem>       | -0.422       |
| FCFP_6                                        | 7                 | <br><chem>[*]O</chem>                                   | -0.372       |
| FCFP_6                                        | 16                | <br><chem>[*]c(:[*]):[*]</chem>                         | -0.354       |



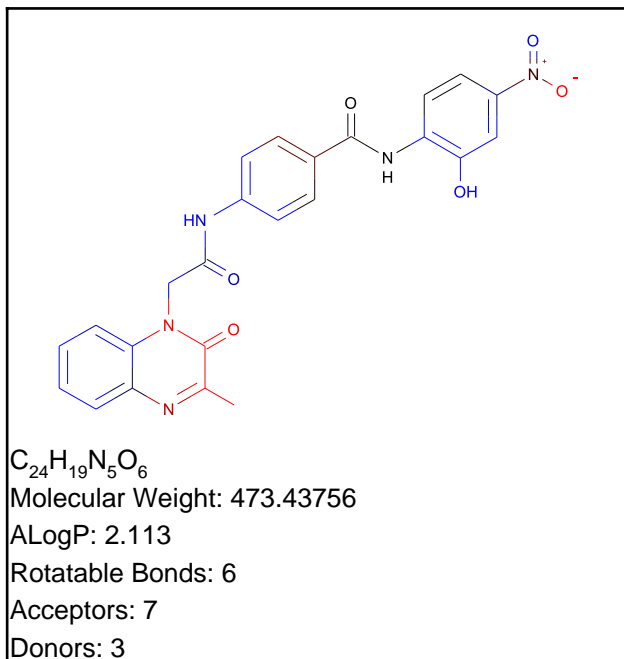

### Model Prediction

Prediction: 18.156

Unit: mg/kg\_body\_weight/day

Mahalanobis Distance: 19.562

Mahalanobis Distance p-value: 2.68e-027

Mahalanobis Distance: The Mahalanobis distance (MD) is a generalization of the Euclidean distance that accounts for correlations among the X properties. It is calculated as the distance to the center of the training data. The larger the MD, the less trustworthy the prediction.

Mahalanobis Distance p-value: The p-value gives the fraction of training data with an MD greater than or equal to the one for the given sample, assuming normally distributed data. The smaller the p-value, the less trustworthy the prediction. For highly non-normal X properties (e.g., fingerprints), the MD p-value is wildly inaccurate.

### Structural Similar Compounds

| Name                        | 623                                                                                 | Salicylazosulfapyridine                                                             | 4-Bis(2-hydroxyethyl)amino-2-(5-nitro-2-thienyl)quinazoline                         |
|-----------------------------|-------------------------------------------------------------------------------------|-------------------------------------------------------------------------------------|-------------------------------------------------------------------------------------|
| Structure                   | 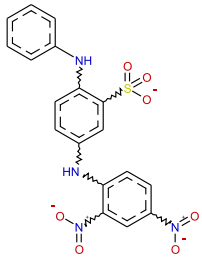 |  |  |
| Actual Endpoint (-log C)    | 2.39985                                                                             | 2.39891                                                                             | 5.05984                                                                             |
| Predicted Endpoint (-log C) | 3.4177                                                                              | 3.17598                                                                             | 4.23808                                                                             |
| Distance                    | 0.641                                                                               | 0.678                                                                               | 0.733                                                                               |
| Reference                   | CPDB                                                                                | CPDB                                                                                | CPDB                                                                                |

### Model Applicability

Unknown features are fingerprint features in the query molecule, but not found in the training set.

- OPS PC20 out of range. Value: 6.0917. Training min, max, SD, explained variance: -3.9266, 5.5565, 1.236, 0.0147.

### Feature Contribution

#### Top features for positive contribution

| Fingerprint | Bit/Smiles | Feature Structure                                                                                | Score |
|-------------|------------|--------------------------------------------------------------------------------------------------|-------|
| FCFP_6      | 5          | 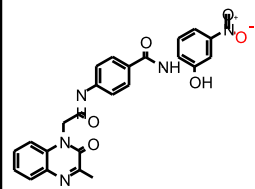<br>[*][O-] | 0.431 |



|                                               |                   |                                                                                                                                                          |              |
|-----------------------------------------------|-------------------|----------------------------------------------------------------------------------------------------------------------------------------------------------|--------------|
| FCFP_6                                        | 565998553         | 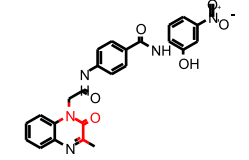<br><chem>[*]N([*])C(=O)C(=[*])</chem><br><chem>[*]</chem>            | 0.357        |
| FCFP_6                                        | 8                 | <br><chem>[*][N+](=[*])[*]</chem>                                     | 0.336        |
| <b>Top Features for negative contribution</b> |                   |                                                                                                                                                          |              |
| <b>Fingerprint</b>                            | <b>Bit/Smiles</b> | <b>Feature Structure</b>                                                                                                                                 | <b>Score</b> |
| FCFP_6                                        | 991735244         | <br><chem>[*]:[c]1:[*]:[cH]:[cH]</chem><br><chem>]:[cH]:[cH]:1</chem> | -0.422       |
| FCFP_6                                        | 7                 | <br><chem>[*]O</chem>                                               | -0.372       |
| FCFP_6                                        | 16                | <br><chem>[*][c](:[*]):[*]</chem>                                   | -0.354       |



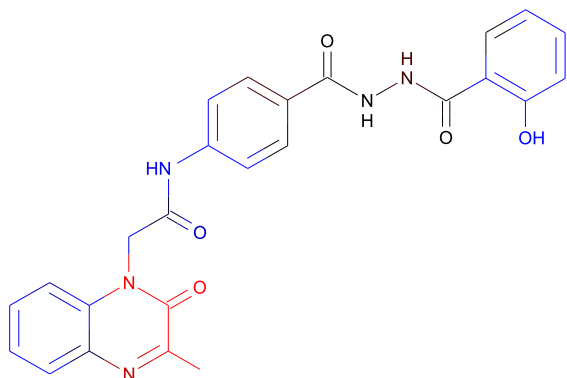
 $C_{25}H_{21}N_5O_5$ 

Molecular Weight: 471.46474

ALogP: 1.475

Rotatable Bonds: 6

Acceptors: 6

Donors: 4

### Model Prediction

Prediction: 59.139

Unit: mg/kg\_body\_weight/day

Mahalanobis Distance: 16.869

Mahalanobis Distance p-value: 3.38e-017

Mahalanobis Distance: The Mahalanobis distance (MD) is a generalization of the Euclidean distance that accounts for correlations among the X properties. It is calculated as the distance to the center of the training data. The larger the MD, the less trustworthy the prediction.

Mahalanobis Distance p-value: The p-value gives the fraction of training data with an MD greater than or equal to the one for the given sample, assuming normally distributed data. The smaller the p-value, the less trustworthy the prediction. For highly non-normal X properties (e.g., fingerprints), the MD p-value is wildly inaccurate.

### Structural Similar Compounds

| Name                        | Salicylazosulfapyridine | Ochratoxin A | 542     |
|-----------------------------|-------------------------|--------------|---------|
| Structure                   |                         |              |         |
| Actual Endpoint (-log C)    | 2.39891                 | 6.47264      | 6.59334 |
| Predicted Endpoint (-log C) | 3.17598                 | 5.06501      | 5.06501 |
| Distance                    | 0.706                   | 0.737        | 0.737   |
| Reference                   | CPDB                    | CPDB         | CPDB    |

### Model Applicability

Unknown features are fingerprint features in the query molecule, but not found in the training set.

- OPS PC20 out of range. Value: 5.8079. Training min, max, SD, explained variance: -3.9266, 5.5565, 1.236, 0.0147.

### Feature Contribution

#### Top features for positive contribution

| Fingerprint | Bit/Smiles | Feature Structure              | Score |
|-------------|------------|--------------------------------|-------|
| FCFP_6      | 565998553  | <br>[*]N[*]C(=O)C(=[*])<br>[*] | 0.357 |

|                                               |                   |                                                                                                                                                           |              |
|-----------------------------------------------|-------------------|-----------------------------------------------------------------------------------------------------------------------------------------------------------|--------------|
| FCFP_6                                        | 565968762         | 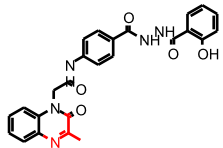<br><chem>[*]N=C(C)C(=[*])[*]<br/>1</chem>                             | 0.266        |
| FCFP_6                                        | -2090462286       | <br><chem>[*]N([*])[c]1:[cH]:[c<br/>H]:[cH]:[cH]:[c]:1[*]<br/>1</chem> | 0.245        |
| <b>Top Features for negative contribution</b> |                   |                                                                                                                                                           |              |
| <b>Fingerprint</b>                            | <b>Bit/Smiles</b> | <b>Feature Structure</b>                                                                                                                                  | <b>Score</b> |
| FCFP_6                                        | 991735244         | <br><chem>[*]:[c]1:[*]:[cH]:[cH<br/>]:[cH]:[cH]:1</chem>               | -0.422       |
| FCFP_6                                        | 7                 | <br><chem>[*]O</chem>                                                | -0.372       |
| FCFP_6                                        | 16                | <br><chem>[*][c](:[*]):[*]</chem>                                    | -0.354       |



# Sorafenib

# TOPKAT\_Carcinogenic\_Potency\_TD50\_Rat

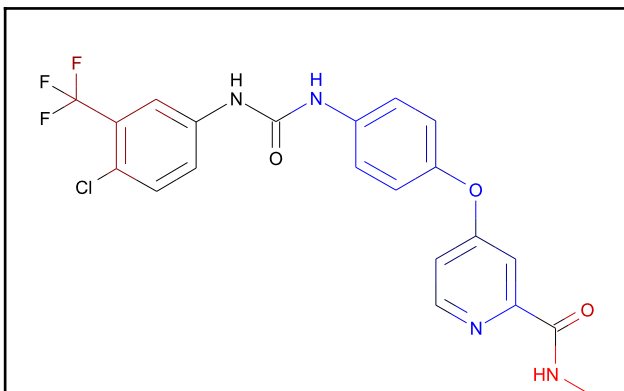

C<sub>21</sub>H<sub>16</sub>ClF<sub>3</sub>N<sub>4</sub>O<sub>3</sub>  
 Molecular Weight: 464.82494  
 ALogP: 4.175  
 Rotatable Bonds: 6  
 Acceptors: 4  
 Donors: 3

## Model Prediction

Prediction: 14.244  
 Unit: mg/kg\_body\_weight/day  
 Mahalanobis Distance: 20.410  
 Mahalanobis Distance p-value: 9.56e-031

Mahalanobis Distance: The Mahalanobis distance (MD) is a generalization of the Euclidean distance that accounts for correlations among the X properties. It is calculated as the distance to the center of the training data. The larger the MD, the less trustworthy the prediction.  
 Mahalanobis Distance p-value: The p-value gives the fraction of training data with an MD greater than or equal to the one for the given sample, assuming normally distributed data. The smaller the p-value, the less trustworthy the prediction. For highly non-normal X properties (e.g., fingerprints), the MD p-value is wildly inaccurate.

## Structural Similar Compounds

| Name                        | Fluvastatin                                                                         | 913                                                                                 | Ochratoxin A                                                                        |
|-----------------------------|-------------------------------------------------------------------------------------|-------------------------------------------------------------------------------------|-------------------------------------------------------------------------------------|
| Structure                   | 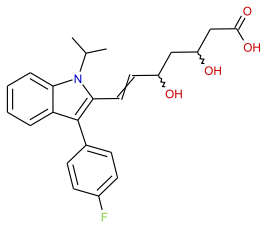 |  |  |
| Actual Endpoint (-log C)    | 3.51742                                                                             | 3.51742                                                                             | 6.47264                                                                             |
| Predicted Endpoint (-log C) | 5.41573                                                                             | 5.41573                                                                             | 5.06501                                                                             |
| Distance                    | 0.597                                                                               | 0.597                                                                               | 0.666                                                                               |
| Reference                   | CPDB                                                                                | CPDB                                                                                | CPDB                                                                                |

## Model Applicability

Unknown features are fingerprint features in the query molecule, but not found in the training set.

- All properties and OPS components are within expected ranges.
- Unknown FCFP\_2 feature: -1029533685: [\*]:[c](:[\*])C(F)(F)F

## Feature Contribution

### Top features for positive contribution

| Fingerprint | Bit/Smiles | Feature Structure                                                                              | Score |
|-------------|------------|------------------------------------------------------------------------------------------------|-------|
| FCFP_6      | 1          | 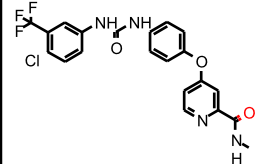<br>[*]=O | 0.234 |

|                                               |                   |                                                                                                                                    |              |
|-----------------------------------------------|-------------------|------------------------------------------------------------------------------------------------------------------------------------|--------------|
| FCFP_6                                        | -885550502        | 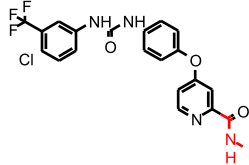<br>[*]CNC(=[*])[*]                             | 0.229        |
| FCFP_6                                        | 32                | <br>[*]Cl                                       | 0.154        |
| <b>Top Features for negative contribution</b> |                   |                                                                                                                                    |              |
| <b>Fingerprint</b>                            | <b>Bit/Smiles</b> | <b>Feature Structure</b>                                                                                                           | <b>Score</b> |
| FCFP_6                                        | 16                | <br>[*][c](:[*]):[*]                            | -0.354       |
| FCFP_6                                        | 590925877         | <br>[*]N[c](:[cH]:[*]):[c<br>H]:[*]           | -0.323       |
| FCFP_6                                        | 1674451008        | <br>[*][c]1:[*]:[cH]:[cH]<br>:[cH]:[c]:1N=[*] | -0.233       |





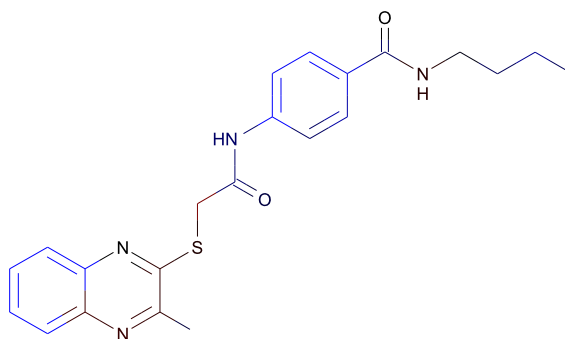

$C_{22}H_{24}N_4O_2S$

Molecular Weight: 408.51656

ALogP: 3.83

Rotatable Bonds: 8

Acceptors: 5

Donors: 2

### Model Prediction

Prediction: 0.583

Unit: g/kg\_body\_weight

Mahalanobis Distance: 33.972

Mahalanobis Distance p-value: 8.09e-032

Mahalanobis Distance: The Mahalanobis distance (MD) is a generalization of the Euclidean distance that accounts for correlations among the X properties. It is calculated as the distance to the center of the training data. The larger the MD, the less trustworthy the prediction.

Mahalanobis Distance p-value: The p-value gives the fraction of training data with an MD greater than or equal to the one for the given sample, assuming normally distributed data. The smaller the p-value, the less trustworthy the prediction. For highly non-normal X properties (e.g., fingerprints), the MD p-value is wildly inaccurate.

### Structural Similar Compounds

| Name                        | GLYBURIDE | GLIPIZIDE | ISOXABEN                        |
|-----------------------------|-----------|-----------|---------------------------------|
| Structure                   |           |           |                                 |
| Actual Endpoint (-log C)    | 4.21661   | 3.94991   | 3.81665                         |
| Predicted Endpoint (-log C) | 4.21035   | 3.95594   | 4.42315                         |
| Distance                    | 0.657     | 0.693     | 0.700                           |
| Reference                   | UPJ-26452 | NDA-17583 | EPA COVER SHEET 0339;881201;(1) |

### Model Applicability

Unknown features are fingerprint features in the query molecule, but not found in the training set.

1. All properties and OPS components are within expected ranges.
2. Unknown ECFP\_6 feature: -830332112: [\*]S[\*]
3. Unknown ECFP\_6 feature: -955816473: [\*]SCC(=[\*])[\*]
4. Unknown ECFP\_6 feature: 1731843802: [\*]CC(=O)N[\*]
5. Unknown ECFP\_6 feature: -177077903: [\*]N[c](:[cH]:[\*]):[cH]:[\*]
6. Unknown ECFP\_6 feature: -175146122: [\*]C(=[\*])[c](:[cH]:[\*]):[cH]:[\*]
7. Unknown ECFP\_6 feature: 1430169877: [\*]NC(=O)[c](:[\*]):[\*]
8. Unknown ECFP\_6 feature: 497523368: [\*]CNC(=[\*])[\*]
9. Unknown ECFP\_6 feature: -1791034651: [\*]CCN[\*]
10. Unknown ECFP\_6 feature: 1997021792: [\*]:[cH]:[cH]:[cH]:[\*]
11. Unknown ECFP\_6 feature: 1410041175: [\*]:[cH]:[c](:n:[\*]):[c](:[\*]):[\*]
12. Unknown ECFP\_6 feature: 1652635785: [\*][c](:[\*]):[c](C):n:[\*]
13. Unknown ECFP\_6 feature: 1050567921: [\*]S[c](:n:[\*]):[c]([\*]):[\*]
14. Unknown ECFP\_6 feature: 1427820655: [\*]CS[c](:[\*]):[\*]
15. Unknown ECFP\_6 feature: -1793471910: [\*]CCC

### Feature Contribution

#### Top features for positive contribution

| Fingerprint | Bit/Smiles | Feature Structure | Score |
|-------------|------------|-------------------|-------|
|-------------|------------|-------------------|-------|

|                                               |                   |                                                                                                                                  |              |
|-----------------------------------------------|-------------------|----------------------------------------------------------------------------------------------------------------------------------|--------------|
| ECFP_6                                        | 1559650422        | 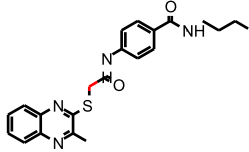<br>[*]C[*]                                   | 0.129        |
| FCFP_6                                        | 3                 | <br>[*]N[*]                                   | 0.092        |
| ECFP_6                                        | 2099970318        | <br>[*]C(=O)[*]                               | 0.077        |
| <b>Top Features for negative contribution</b> |                   |                                                                                                                                  |              |
| <b>Fingerprint</b>                            | <b>Bit/Smiles</b> | <b>Feature Structure</b>                                                                                                         | <b>Score</b> |
| FCFP_6                                        | 991735244         | <br>[*]:[c]1:[*]:[cH]:[cH]<br>[:[cH]:[cH]:1 | -0.134       |
| ECFP_6                                        | 1564392544        | <br>[*]:[c]1:[*]:[cH]:[cH]<br>[:[cH]:[cH]:1 | -0.133       |

|        |   |                                                                                                                                |        |
|--------|---|--------------------------------------------------------------------------------------------------------------------------------|--------|
| FCFP_6 | 1 | 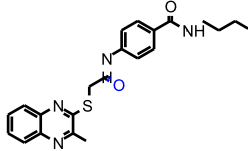 <p data-bbox="1465 305 1533 337">[*]=O</p> | -0.102 |
|--------|---|--------------------------------------------------------------------------------------------------------------------------------|--------|

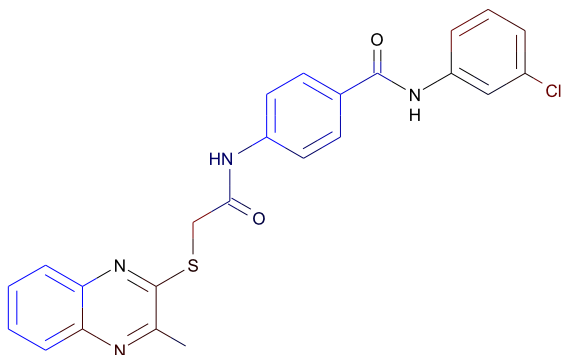

$C_{24}H_{19}ClN_4O_2S$

Molecular Weight: 462.95126

ALogP: 4.743

Rotatable Bonds: 6

Acceptors: 5

Donors: 2

### Model Prediction

Prediction: 0.114

Unit: g/kg\_body\_weight

Mahalanobis Distance: 36.682

Mahalanobis Distance p-value: 1.47e-036

Mahalanobis Distance: The Mahalanobis distance (MD) is a generalization of the Euclidean distance that accounts for correlations among the X properties. It is calculated as the distance to the center of the training data. The larger the MD, the less trustworthy the prediction.

Mahalanobis Distance p-value: The p-value gives the fraction of training data with an MD greater than or equal to the one for the given sample, assuming normally distributed data. The smaller the p-value, the less trustworthy the prediction. For highly non-normal X properties (e.g., fingerprints), the MD p-value is wildly inaccurate.

### Structural Similar Compounds

| Name                        | D & C RED 9      | ASSURE                          | GLYBURIDE |
|-----------------------------|------------------|---------------------------------|-----------|
| Structure                   |                  |                                 |           |
| Actual Endpoint (-log C)    | 3.87715          | 5.00328                         | 4.21661   |
| Predicted Endpoint (-log C) | 3.6546           | 4.27671                         | 4.21035   |
| Distance                    | 0.707            | 0.770                           | 0.776     |
| Reference                   | NTP REPORT # 225 | EPA COVER SHEET 0335;891001;(1) | UPJ-26452 |

### Model Applicability

Unknown features are fingerprint features in the query molecule, but not found in the training set.

1. All properties and OPS components are within expected ranges.
2. Unknown ECFP\_6 feature: -830332112: [\*]S[\*]
3. Unknown ECFP\_6 feature: -955816473: [\*]SCC(=[\*])[\*]
4. Unknown ECFP\_6 feature: 1731843802: [\*]CC(=O)N[\*]
5. Unknown ECFP\_6 feature: -177077903: [\*]N[c](:[cH]:[\*]):[cH]:[\*]
6. Unknown ECFP\_6 feature: -175146122: [\*]C(=[\*])[c](:[cH]:[\*]):[cH]:[\*]
7. Unknown ECFP\_6 feature: 1430169877: [\*]NC(=O)[c](:[\*]):[\*]
8. Unknown ECFP\_6 feature: 1997021792: [\*]:[cH]:[cH]:[cH]:[\*]
9. Unknown ECFP\_6 feature: 1410041175: [\*]:[cH]:[c](:n:[\*]):[c](:[\*]):[\*]
10. Unknown ECFP\_6 feature: 1652635785: [\*][c](:[\*]):[c](C):n:[\*]
11. Unknown ECFP\_6 feature: 1050567921: [\*]S[c](:n:[\*]):[c]([\*]):[\*]
12. Unknown ECFP\_6 feature: 1427820655: [\*]CS[c](:[\*]):[\*]
13. Unknown ECFP\_6 feature: -176494269: [\*]:[cH]:[c](Cl):[cH]:[\*]
14. Unknown ECFP\_6 feature: 99947387: [\*]:[c](:[\*])Cl

### Feature Contribution

#### Top features for positive contribution

| Fingerprint | Bit/Smiles | Feature Structure | Score |
|-------------|------------|-------------------|-------|
|             |            |                   |       |

| ECFP_6                                 | 1559650422 | 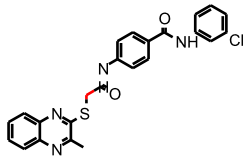<br>[*]C[*]                                   | 0.129  |
|----------------------------------------|------------|----------------------------------------------------------------------------------------------------------------------------------|--------|
| FCFP_6                                 | 32         | <br>[*]Cl                                     | 0.101  |
| FCFP_6                                 | 3          | <br>[*]N[*]                                   | 0.092  |
| Top Features for negative contribution |            |                                                                                                                                  |        |
| Fingerprint                            | Bit/Smiles | Feature Structure                                                                                                                | Score  |
| FCFP_6                                 | 991735244  | <br>[*]:[c]1:[*]:[cH]:[cH]<br>[:[cH]:[cH]:1 | -0.134 |
| ECFP_6                                 | 1564392544 | <br>[*]:[c]1:[*]:[cH]:[cH]<br>[:[cH]:[cH]:1 | -0.133 |

|        |   |                                                                                                                                |        |
|--------|---|--------------------------------------------------------------------------------------------------------------------------------|--------|
| FCFP_6 | 1 | 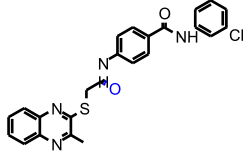 <p data-bbox="1465 305 1533 332">[*]=O</p> | -0.102 |
|--------|---|--------------------------------------------------------------------------------------------------------------------------------|--------|

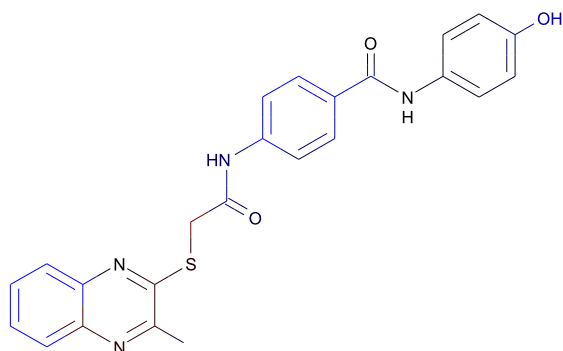
 $C_{24}H_{20}N_4O_3S$ 

Molecular Weight: 444.5056

ALogP: 3.836

Rotatable Bonds: 6

Acceptors: 6

Donors: 3

### Model Prediction

Prediction: 0.181

Unit: g/kg\_body\_weight

Mahalanobis Distance: 36.988

Mahalanobis Distance p-value: 4.39e-037

Mahalanobis Distance: The Mahalanobis distance (MD) is a generalization of the Euclidean distance that accounts for correlations among the X properties. It is calculated as the distance to the center of the training data. The larger the MD, the less trustworthy the prediction.

Mahalanobis Distance p-value: The p-value gives the fraction of training data with an MD greater than or equal to the one for the given sample, assuming normally distributed data. The smaller the p-value, the less trustworthy the prediction. For highly non-normal X properties (e.g., fingerprints), the MD p-value is wildly inaccurate.

### Structural Similar Compounds

| Name                        | C.I. ACID RED 14 | C.I.PIGMENT RED 23 | D & C RED 9      |
|-----------------------------|------------------|--------------------|------------------|
| Structure                   |                  |                    |                  |
| Actual Endpoint (-log C)    | 2.8654           | 2.28997            | 3.87715          |
| Predicted Endpoint (-log C) | 3.29295          | 3.52921            | 3.6546           |
| Distance                    | 0.724            | 0.739              | 0.742            |
| Reference                   | NTP REPORT # 220 | NTP 411 146        | NTP REPORT # 225 |

### Model Applicability

Unknown features are fingerprint features in the query molecule, but not found in the training set.

- All properties and OPS components are within expected ranges.
- Unknown ECFP\_6 feature: -830332112: [\*]S[\*]
- Unknown ECFP\_6 feature: -955816473: [\*]SCC(=[\*])[\*]
- Unknown ECFP\_6 feature: 1731843802: [\*]CC(=O)N[\*]
- Unknown ECFP\_6 feature: -177077903: [\*]N[c](:[cH]:[\*]):[cH]:[\*]
- Unknown ECFP\_6 feature: -175146122: [\*]C(=[\*])[c](:[cH]:[\*]):[cH]:[\*]
- Unknown ECFP\_6 feature: 1430169877: [\*]NC(=O)[c](:[\*]):[\*]
- Unknown ECFP\_6 feature: 1997021792: [\*]:[cH]:[cH]:[cH]:[\*]
- Unknown ECFP\_6 feature: 1410041175: [\*]:[cH]:[c](:n:[\*]):[c](:[\*]):[\*]
- Unknown ECFP\_6 feature: 1652635785: [\*][c](:[\*]):[c](C):n:[\*]
- Unknown ECFP\_6 feature: 1050567921: [\*]S[c](:n:[\*]):[c]([\*]):[\*]
- Unknown ECFP\_6 feature: 1427820655: [\*]CS[c](:[\*]):[\*]
- Unknown ECFP\_6 feature: -177786161: [\*]:[cH]:[c](O):[cH]:[\*]
- Unknown ECFP\_6 feature: 2019062761: [\*]:[c](:[\*])O

### Feature Contribution

#### Top features for positive contribution

| Fingerprint | Bit/Smiles | Feature Structure | Score |
|-------------|------------|-------------------|-------|
|             |            |                   |       |

|                                               |                   |                                                                                                                                  |              |
|-----------------------------------------------|-------------------|----------------------------------------------------------------------------------------------------------------------------------|--------------|
| ECFP_6                                        | 1559650422        | 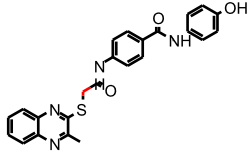<br>[*]C[*]                                   | 0.129        |
| FCFP_6                                        | 3                 | <br>[*]N[*]                                   | 0.092        |
| ECFP_6                                        | 2099970318        | <br>[*]C(=O)[*]                               | 0.077        |
| <b>Top Features for negative contribution</b> |                   |                                                                                                                                  |              |
| <b>Fingerprint</b>                            | <b>Bit/Smiles</b> | <b>Feature Structure</b>                                                                                                         | <b>Score</b> |
| FCFP_6                                        | 991735244         | <br>[*]:[c]1:[*]:[cH]:[cH]<br>]:[cH]:[cH]:1 | -0.134       |
| ECFP_6                                        | 1564392544        | <br>[*]:[c]1:[*]:[cH]:[cH]<br>]:[cH]:[cH]:1 | -0.133       |



|        |   |                                                                                              |        |
|--------|---|----------------------------------------------------------------------------------------------|--------|
| FCFP_6 | 1 | 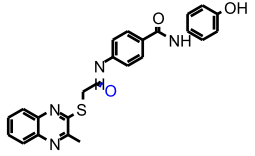<br>[*]=O | -0.102 |
|--------|---|----------------------------------------------------------------------------------------------|--------|

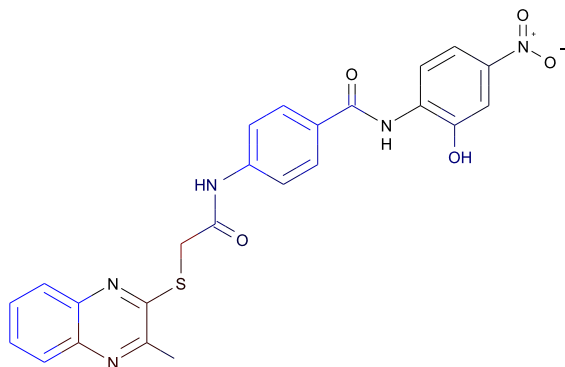

$C_{24}H_{19}N_5O_5S$

Molecular Weight: 489.50316

ALogP: 3.731

Rotatable Bonds: 7

Acceptors: 8

Donors: 3

### Model Prediction

Prediction: 0.091

Unit: g/kg\_body\_weight

Mahalanobis Distance: 42.015

Mahalanobis Distance p-value: 1.87e-045

Mahalanobis Distance: The Mahalanobis distance (MD) is a generalization of the Euclidean distance that accounts for correlations among the X properties. It is calculated as the distance to the center of the training data. The larger the MD, the less trustworthy the prediction.

Mahalanobis Distance p-value: The p-value gives the fraction of training data with an MD greater than or equal to the one for the given sample, assuming normally distributed data. The smaller the p-value, the less trustworthy the prediction. For highly non-normal X properties (e.g., fingerprints), the MD p-value is wildly inaccurate.

### Structural Similar Compounds

| Name                        | C.I. PIGMENT RED 23 | C.I. ACID RED 14 | C.I. ACID ORANGE 3 |
|-----------------------------|---------------------|------------------|--------------------|
| Structure                   |                     |                  |                    |
| Actual Endpoint (-log C)    | 2.28997             | 2.8654           | 3.20573            |
| Predicted Endpoint (-log C) | 3.52921             | 3.29295          | 3.55956            |
| Distance                    | 0.551               | 0.589            | 0.618              |
| Reference                   | NTP 411 146         | NTP REPORT # 220 | NTP REPORT # 335   |

### Model Applicability

Unknown features are fingerprint features in the query molecule, but not found in the training set.

- All properties and OPS components are within expected ranges.
- Unknown FCFP\_2 feature: 5: [\*][O-]
- Unknown FCFP\_2 feature: -828984032: [\*][N+](=[\*])[c](:c[\*]):c[\*]
- Unknown FCFP\_2 feature: -1338588315: [\*]:[c](:[\*])[N+](=O)[O-]
- Unknown FCFP\_2 feature: 1872392852: [\*][N+](=O)[\*]
- Unknown FCFP\_2 feature: 260476081: [\*][N+](=[\*])[O-]
- Unknown ECFP\_6 feature: -830332112: [\*]S[\*]
- Unknown ECFP\_6 feature: 1043790491: [\*][N+](=[\*])[\*]
- Unknown ECFP\_6 feature: 781519895: [\*][O-]
- Unknown ECFP\_6 feature: -955816473: [\*]SCC(=[\*])[\*]
- Unknown ECFP\_6 feature: 1731843802: [\*]CC(=O)N[\*]
- Unknown ECFP\_6 feature: -177077903: [\*]N[c](:[cH]:[\*]):[cH]:[\*]
- Unknown ECFP\_6 feature: -175146122: [\*]C(=[\*])[c](:[cH]:[\*]):[cH]:[\*]
- Unknown ECFP\_6 feature: 1430169877: [\*]NC(=O)[c](:[\*]):[\*]
- Unknown ECFP\_6 feature: 1335108269: [\*]N[c](:[cH]:[\*]):[c]([\*]):[\*]
- Unknown ECFP\_6 feature: 1997021792: [\*]:[cH]:[cH]:[cH]:[\*]
- Unknown ECFP\_6 feature: 1410041175: [\*]:[cH]:[c](:n[\*]):[c]([\*]):[\*]
- Unknown ECFP\_6 feature: 1652635785: [\*][c]([\*]):[c](C):n[\*]
- Unknown ECFP\_6 feature: 1050567921: [\*]S[c](:n[\*]):[c]([\*]):[\*]
- Unknown ECFP\_6 feature: 1427820655: [\*]CS[c]([\*]):[\*]
- Unknown ECFP\_6 feature: -179073144: [\*][N+](=[\*])[c](:[cH]:[\*]):[cH]:[\*]

- 22. Unknown ECFP\_6 feature: 2019062761: [\*]:[c](:[\*])O
- 23. Unknown ECFP\_6 feature: -215026467: [\*]:[c](:[\*])[N+](=O)[O-]
- 24. Unknown ECFP\_6 feature: 2104376220: [\*][N+](=O)[\*]
- 25. Unknown ECFP\_6 feature: -659271057: [\*][N+](=[\*])[O-]

## Feature Contribution

### Top features for positive contribution

| Fingerprint | Bit/Smiles | Feature Structure                                                                                   | Score |
|-------------|------------|-----------------------------------------------------------------------------------------------------|-------|
| ECFP_6      | 1559650422 | 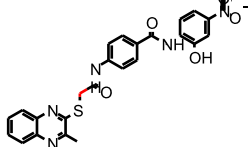<br>[*]C[*]      | 0.129 |
| FCFP_6      | 3          | <br>[*]N[*]      | 0.092 |
| ECFP_6      | 2099970318 | <br>[*]C(=O)[*] | 0.077 |

### Top Features for negative contribution

| Fingerprint | Bit/Smiles | Feature Structure | Score |
|-------------|------------|-------------------|-------|
|             |            |                   |       |

|        |            |                                                                                                                                                                   |        |
|--------|------------|-------------------------------------------------------------------------------------------------------------------------------------------------------------------|--------|
| FCFP_6 | 991735244  | 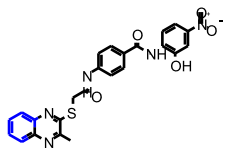 <p data-bbox="1386 276 1575 332">[*]:[c]1:[*]:[cH]:[cH]<br/>]:[cH]:[cH]:1</p> | -0.134 |
| ECFP_6 | 1564392544 |  <p data-bbox="1386 548 1575 605">[*]:[c]1:[*]:[cH]:[cH]<br/>]:[cH]:[cH]:1</p> | -0.133 |
| FCFP_6 | 1          |  <p data-bbox="1459 841 1533 881">[*]=O</p>                                    | -0.102 |

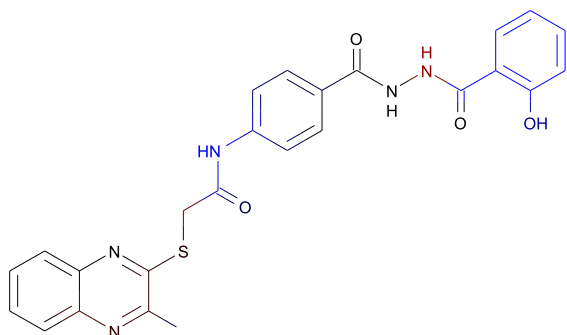

$C_{25}H_{21}N_5O_4S$

Molecular Weight: 487.53034

ALogP: 3.093

Rotatable Bonds: 7

Acceptors: 7

Donors: 4

### Model Prediction

Prediction: 0.382

Unit: g/kg\_body\_weight

Mahalanobis Distance: 39.016

Mahalanobis Distance p-value: 1.58e-040

Mahalanobis Distance: The Mahalanobis distance (MD) is a generalization of the Euclidean distance that accounts for correlations among the X properties. It is calculated as the distance to the center of the training data. The larger the MD, the less trustworthy the prediction.

Mahalanobis Distance p-value: The p-value gives the fraction of training data with an MD greater than or equal to the one for the given sample, assuming normally distributed data. The smaller the p-value, the less trustworthy the prediction. For highly non-normal X properties (e.g., fingerprints), the MD p-value is wildly inaccurate.

### Structural Similar Compounds

| Name                        | C.I. ACID RED 14 | C.I.PIGMENT RED 23 | C.I. ACID ORANGE 3 |
|-----------------------------|------------------|--------------------|--------------------|
| Structure                   |                  |                    |                    |
| Actual Endpoint (-log C)    | 2.8654           | 2.28997            | 3.20573            |
| Predicted Endpoint (-log C) | 3.29295          | 3.52921            | 3.55956            |
| Distance                    | 0.681            | 0.716              | 0.727              |
| Reference                   | NTP REPORT # 220 | NTP 411 146        | NTP REPORT # 335   |

### Model Applicability

Unknown features are fingerprint features in the query molecule, but not found in the training set.

1. All properties and OPS components are within expected ranges.
2. Unknown ECFP\_6 feature: -830332112: [\*]S[\*]
3. Unknown ECFP\_6 feature: 1635339976: [\*]NNC(=[\*])[\*]
4. Unknown ECFP\_6 feature: 1430169877: [\*]NC(=O)[c](:[\*]):[\*]
5. Unknown ECFP\_6 feature: 1997021792: [\*]:[cH]:[cH]:[cH]:[\*]
6. Unknown ECFP\_6 feature: 2019062761: [\*]:[c](:[\*])O
7. Unknown ECFP\_6 feature: -955816473: [\*]SCC(=[\*])[\*]
8. Unknown ECFP\_6 feature: 1731843802: [\*]CC(=O)N[\*]
9. Unknown ECFP\_6 feature: -177077903: [\*]N[c](:[cH]:[\*]):[cH]:[\*]
10. Unknown ECFP\_6 feature: -175146122: [\*]C(=[\*])[c](:[cH]:[\*]):[cH]:[\*]
11. Unknown ECFP\_6 feature: 1410041175: [\*]:[cH]:[c](:n:[\*]):[c](:[\*]):[\*]
12. Unknown ECFP\_6 feature: 1652635785: [\*][c](:[\*]):[c](C):n:[\*]
13. Unknown ECFP\_6 feature: 1050567921: [\*]S[c](:n:[\*]):[c]([\*]):[\*]
14. Unknown ECFP\_6 feature: 1427820655: [\*]CS[c](:[\*]):[\*]

### Feature Contribution

#### Top features for positive contribution

| Fingerprint | Bit/Smiles | Feature Structure | Score |
|-------------|------------|-------------------|-------|
|             |            |                   |       |

| ECFP_6                                 | 1559650422 | 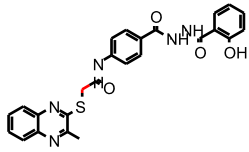<br>[*]C[*]                                   | 0.129  |
|----------------------------------------|------------|----------------------------------------------------------------------------------------------------------------------------------|--------|
| FCFP_6                                 | 3          | <br>[*]N[*]                                   | 0.092  |
| ECFP_6                                 | 2099970318 | <br>[*]C(=O)[*]                               | 0.077  |
| Top Features for negative contribution |            |                                                                                                                                  |        |
| Fingerprint                            | Bit/Smiles | Feature Structure                                                                                                                | Score  |
| ECFP_6                                 | 1337040050 | <br>[*]C(=[*])[c](:[cH]:[<br>*]):c([*]):[*] | -0.158 |
| FCFP_6                                 | 991735244  | <br>[*]:[c]1:[*]:[cH]:[cH]<br>]:[cH]:[cH]:1 | -0.134 |

|        |            |                                                                                                                                            |        |
|--------|------------|--------------------------------------------------------------------------------------------------------------------------------------------|--------|
| ECFP_6 | 1564392544 | 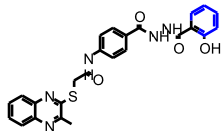<br><chem>O=C(O)Nc1ccc(cc1)N(C)C2=CN=C3C=CC=C3N2</chem> | -0.133 |
|--------|------------|--------------------------------------------------------------------------------------------------------------------------------------------|--------|

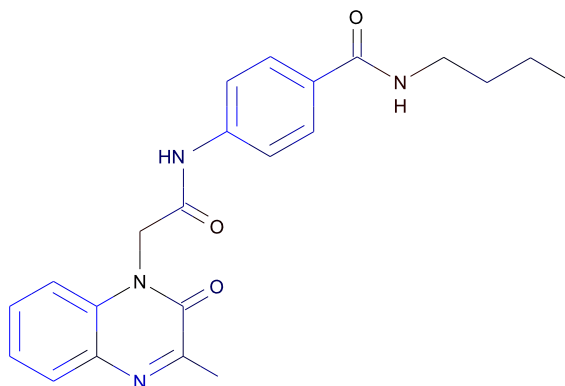
 $C_{22}H_{24}N_4O_3$ 

Molecular Weight: 392.45096

ALogP: 2.212

Rotatable Bonds: 7

Acceptors: 4

Donors: 2

### Model Prediction

Prediction: 0.334

Unit: g/kg\_body\_weight

Mahalanobis Distance: 31.967

Mahalanobis Distance p-value: 3.12e-028

Mahalanobis Distance: The Mahalanobis distance (MD) is a generalization of the Euclidean distance that accounts for correlations among the X properties. It is calculated as the distance to the center of the training data. The larger the MD, the less trustworthy the prediction.

Mahalanobis Distance p-value: The p-value gives the fraction of training data with an MD greater than or equal to the one for the given sample, assuming normally distributed data. The smaller the p-value, the less trustworthy the prediction. For highly non-normal X properties (e.g., fingerprints), the MD p-value is wildly inaccurate.

### Structural Similar Compounds

| Name                        | ISOXABEN                           | ACEBUTOLOL | DILTIAZEM |
|-----------------------------|------------------------------------|------------|-----------|
| Structure                   |                                    |            |           |
| Actual Endpoint (-log C)    | 3.81665                            | 3.04978    | 4.21961   |
| Predicted Endpoint (-log C) | 4.42315                            | 3.08045    | 4.005     |
| Distance                    | 0.623                              | 0.641      | 0.654     |
| Reference                   | EPA COVER SHEET<br>0339;881201;(1) | NDA-18917  | NDA-18602 |

### Model Applicability

Unknown features are fingerprint features in the query molecule, but not found in the training set.

1. All properties and OPS components are within expected ranges.
2. Unknown ECFP\_6 feature: 1997021792: [\*]:[cH]:[cH]:[cH]:[\*]
3. Unknown ECFP\_6 feature: -597295171: [\*][c](:[\*]):[c](:[cH]:[\*])N=[\*]
4. Unknown ECFP\_6 feature: -1236953626: [\*]N([\*])[c](:[cH]:[\*]):[c]([\*]):[\*]
5. Unknown ECFP\_6 feature: 2085698692: [\*]C(=N[c](:[\*]):[\*])[\*]
6. Unknown ECFP\_6 feature: 1483289300: [\*]N=C(\C)/C(=[\*])[\*]
7. Unknown ECFP\_6 feature: 1945129186: [\*]N([\*])C(=O)C(=[\*])[\*]
8. Unknown ECFP\_6 feature: -661097313: [\*]CN(C(=[\*])[\*])[c](:[\*]):[\*]
9. Unknown ECFP\_6 feature: -37698365: [\*]N([\*])CC(=[\*])[\*]
10. Unknown ECFP\_6 feature: 1731843802: [\*]CC(=O)N[\*]
11. Unknown ECFP\_6 feature: -177077903: [\*]N[c](:[cH]:[\*]):[cH]:[\*]
12. Unknown ECFP\_6 feature: -175146122: [\*]C(=[\*])[c](:[cH]:[\*]):[cH]:[\*]
13. Unknown ECFP\_6 feature: 1430169877: [\*]NC(=O)[c](:[\*]):[\*]
14. Unknown ECFP\_6 feature: 497523368: [\*]CNC(=[\*])[\*]
15. Unknown ECFP\_6 feature: -1791034651: [\*]CCN[\*]
16. Unknown ECFP\_6 feature: -1793471910: [\*]CCC

### Feature Contribution

Top features for positive contribution



| Fingerprint                                   | Bit/Smiles | Feature Structure                                                                                                               | Score  |
|-----------------------------------------------|------------|---------------------------------------------------------------------------------------------------------------------------------|--------|
| ECFP_6                                        | 1559650422 | 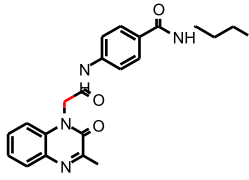<br>[*]C[*]                                  | 0.129  |
| FCFP_6                                        | 3          | <br>[*]N[*]                                  | 0.092  |
| ECFP_6                                        | 2099970318 | <br>[*]C(=O)[*]                              | 0.077  |
| <b>Top Features for negative contribution</b> |            |                                                                                                                                 |        |
| Fingerprint                                   | Bit/Smiles | Feature Structure                                                                                                               | Score  |
| FCFP_6                                        | 991735244  | <br>[*]:[c]1:[*]:[cH]:[cH]<br>:[cH]:[cH]:1 | -0.134 |

|        |            |                                                                                                                                                                  |        |
|--------|------------|------------------------------------------------------------------------------------------------------------------------------------------------------------------|--------|
| ECFP_6 | 1564392544 | 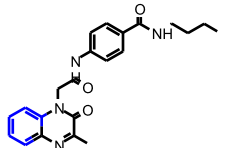 <p data-bbox="1386 276 1575 341">[*]:[c]1:[*]:[cH]:[cH]<br/>:[cH]:[cH]:1</p> | -0.133 |
| ECFP_6 | 2106656448 |  <p data-bbox="1417 576 1554 617">[*]C(=O)[*]</p>                             | -0.110 |

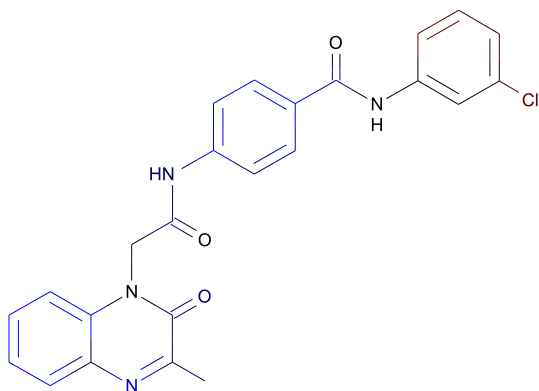

$C_{24}H_{19}ClN_4O_3$   
 Molecular Weight: 446.88566  
 ALogP: 3.125  
 Rotatable Bonds: 5  
 Acceptors: 4  
 Donors: 2

### Model Prediction

Prediction: 0.072  
 Unit: g/kg\_body\_weight  
 Mahalanobis Distance: 31.457  
 Mahalanobis Distance p-value: 2.59e-027

Mahalanobis Distance: The Mahalanobis distance (MD) is a generalization of the Euclidean distance that accounts for correlations among the X properties. It is calculated as the distance to the center of the training data. The larger the MD, the less trustworthy the prediction.

Mahalanobis Distance p-value: The p-value gives the fraction of training data with an MD greater than or equal to the one for the given sample, assuming normally distributed data. The smaller the p-value, the less trustworthy the prediction. For highly non-normal X properties (e.g., fingerprints), the MD p-value is wildly inaccurate.

### Structural Similar Compounds

| Name                        | GLYBURIDE | D & C RED 9      | DILTIAZEM |
|-----------------------------|-----------|------------------|-----------|
| Structure                   |           |                  |           |
| Actual Endpoint (-log C)    | 4.21661   | 3.87715          | 4.21961   |
| Predicted Endpoint (-log C) | 4.21035   | 3.6546           | 4.005     |
| Distance                    | 0.720     | 0.722            | 0.723     |
| Reference                   | UPJ-26452 | NTP REPORT # 225 | NDA-18602 |

### Model Applicability

Unknown features are fingerprint features in the query molecule, but not found in the training set.

- All properties and OPS components are within expected ranges.
- Unknown ECFP\_6 feature: 1997021792: [\*]:[cH]:[cH]:[cH]:[\*]
- Unknown ECFP\_6 feature: -597295171: [\*]:[c](:[\*]):[c](:[cH]:[\*])N=[\*]
- Unknown ECFP\_6 feature: -1236953626: [\*]N([\*])[c](:[cH]:[\*]):[c]([\*]):[\*]
- Unknown ECFP\_6 feature: 2085698692: [\*]C(=N[c](:[\*]):[\*])[\*]
- Unknown ECFP\_6 feature: 1483289300: [\*]N=C(\C)/C(=[\*])[\*]
- Unknown ECFP\_6 feature: 1945129186: [\*]N([\*])C(=O)C(=[\*])[\*]
- Unknown ECFP\_6 feature: -661097313: [\*]CN(C(=[\*])[\*])[c](:[\*]):[\*]
- Unknown ECFP\_6 feature: -37698365: [\*]N([\*])CC(=[\*])[\*]
- Unknown ECFP\_6 feature: 1731843802: [\*]CC(=O)N[\*]
- Unknown ECFP\_6 feature: -177077903: [\*]N[c](:[cH]:[\*]):[cH]:[\*]
- Unknown ECFP\_6 feature: -175146122: [\*]C(=[\*])[c](:[cH]:[\*]):[cH]:[\*]
- Unknown ECFP\_6 feature: 1430169877: [\*]NC(=O)[c](:[\*]):[\*]
- Unknown ECFP\_6 feature: -176494269: [\*]:[cH]:[c](Cl):[cH]:[\*]
- Unknown ECFP\_6 feature: 99947387: [\*]:[c](:[\*])Cl

### Feature Contribution

#### Top features for positive contribution

| Fingerprint | Bit/Smiles | Feature Structure | Score |
|-------------|------------|-------------------|-------|
|             |            |                   |       |

|                                               |                   |                                                                                                                                  |              |
|-----------------------------------------------|-------------------|----------------------------------------------------------------------------------------------------------------------------------|--------------|
| ECFP_6                                        | 1559650422        | 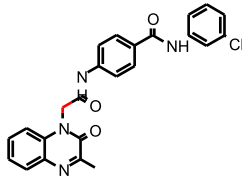<br>[*]C[*]                                   | 0.129        |
| FCFP_6                                        | 32                | <br>[*]Cl                                     | 0.101        |
| FCFP_6                                        | 3                 | <br>[*]N[*]                                   | 0.092        |
| <b>Top Features for negative contribution</b> |                   |                                                                                                                                  |              |
| <b>Fingerprint</b>                            | <b>Bit/Smiles</b> | <b>Feature Structure</b>                                                                                                         | <b>Score</b> |
| FCFP_6                                        | 991735244         | <br>[*]:[c]1:[*]:[cH]:[cH]<br>]:[cH]:[cH]:1 | -0.134       |
| ECFP_6                                        | 1564392544        | <br>[*]:[c]1:[*]:[cH]:[cH]<br>]:[cH]:[cH]:1 | -0.133       |

|        |            |                                                                                                    |        |
|--------|------------|----------------------------------------------------------------------------------------------------|--------|
| ECFP_6 | 2106656448 | 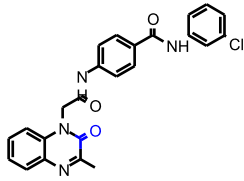<br>[*]C(=O)[*] | -0.110 |
|--------|------------|----------------------------------------------------------------------------------------------------|--------|

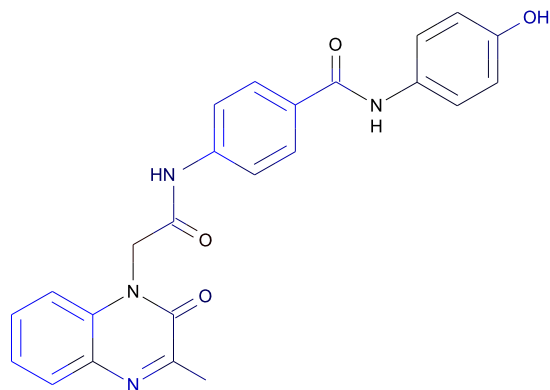
 $C_{24}H_{20}N_4O_4$ 

Molecular Weight: 428.44

ALogP: 2.218

Rotatable Bonds: 5

Acceptors: 5

Donors: 3

### Model Prediction

Prediction: 0.132

Unit: g/kg\_body\_weight

Mahalanobis Distance: 31.083

Mahalanobis Distance p-value: 1.24e-026

Mahalanobis Distance: The Mahalanobis distance (MD) is a generalization of the Euclidean distance that accounts for correlations among the X properties. It is calculated as the distance to the center of the training data. The larger the MD, the less trustworthy the prediction.

Mahalanobis Distance p-value: The p-value gives the fraction of training data with an MD greater than or equal to the one for the given sample, assuming normally distributed data. The smaller the p-value, the less trustworthy the prediction. For highly non-normal X properties (e.g., fingerprints), the MD p-value is wildly inaccurate.

### Structural Similar Compounds

| Name                        | GLIPIZIDE | GLYBURIDE | CHLORSULFURON                   |
|-----------------------------|-----------|-----------|---------------------------------|
| Structure                   |           |           |                                 |
| Actual Endpoint (-log C)    | 3.94991   | 4.21661   | 4.15566                         |
| Predicted Endpoint (-log C) | 3.95594   | 4.21035   | 3.79771                         |
| Distance                    | 0.653     | 0.701     | 0.742                           |
| Reference                   | NDA-17583 | UPJ-26452 | EPA COVER SHEET 0027;880301;(1) |

### Model Applicability

Unknown features are fingerprint features in the query molecule, but not found in the training set.

1. All properties and OPS components are within expected ranges.
2. Unknown ECFP\_6 feature: 1997021792: [\*]:[cH]:[cH]:[cH]:[\*]
3. Unknown ECFP\_6 feature: -597295171: [\*][c](:[\*]):[c](:[cH]:[\*])N=[\*]
4. Unknown ECFP\_6 feature: -1236953626: [\*]N([\*])[c](:[cH]:[\*]):[c]([\*]):[\*]
5. Unknown ECFP\_6 feature: 2085698692: [\*]C(=N[c](:[\*]):[\*])[\*]
6. Unknown ECFP\_6 feature: 1483289300: [\*]N=C(\C)/C(=[\*])[\*]
7. Unknown ECFP\_6 feature: 1945129186: [\*]N([\*])C(=O)C(=[\*])[\*]
8. Unknown ECFP\_6 feature: -661097313: [\*]CN(C(=[\*])[\*])[c](:[\*]):[\*]
9. Unknown ECFP\_6 feature: -37698365: [\*]N([\*])CC(=[\*])[\*]
10. Unknown ECFP\_6 feature: 1731843802: [\*]CC(=O)N[\*]
11. Unknown ECFP\_6 feature: -177077903: [\*]N[c](:[cH]:[\*]):[cH]:[\*]
12. Unknown ECFP\_6 feature: -175146122: [\*]C(=[\*])[c](:[cH]:[\*]):[cH]:[\*]
13. Unknown ECFP\_6 feature: 1430169877: [\*]NC(=O)[c](:[\*]):[\*]
14. Unknown ECFP\_6 feature: -177786161: [\*]:[cH]:[c](O):[cH]:[\*]
15. Unknown ECFP\_6 feature: 2019062761: [\*]:[c](:[\*])O

### Feature Contribution

#### Top features for positive contribution

| Fingerprint | Bit/Smiles | Feature Structure | Score |
|-------------|------------|-------------------|-------|
|-------------|------------|-------------------|-------|

|        |            |                                                                                                    |       |
|--------|------------|----------------------------------------------------------------------------------------------------|-------|
| ECFP_6 | 1559650422 | 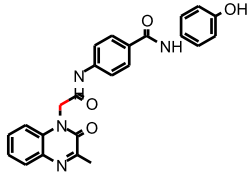<br>[*]C[*]     | 0.129 |
| FCFP_6 | 3          | <br>[*]N[*]     | 0.092 |
| ECFP_6 | 2099970318 | <br>[*]C(=O)[*] | 0.077 |

### Top Features for negative contribution

| Fingerprint | Bit/Smiles | Feature Structure                                                                                                                | Score  |
|-------------|------------|----------------------------------------------------------------------------------------------------------------------------------|--------|
| FCFP_6      | 991735244  | 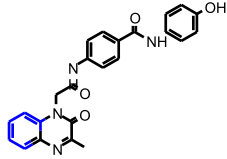<br>[*]:[c]1:[*]:[cH]:[cH]<br>]:[cH]:[cH]:1 | -0.134 |
| ECFP_6      | 1564392544 | <br>[*]:[c]1:[*]:[cH]:[cH]<br>]:[cH]:[cH]:1 | -0.133 |

|        |            |                                                                                                    |        |
|--------|------------|----------------------------------------------------------------------------------------------------|--------|
| ECFP_6 | 2106656448 | 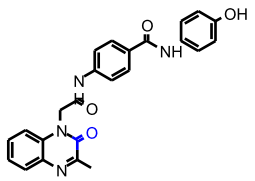<br>[*]C(=O)[*] | -0.110 |
|--------|------------|----------------------------------------------------------------------------------------------------|--------|



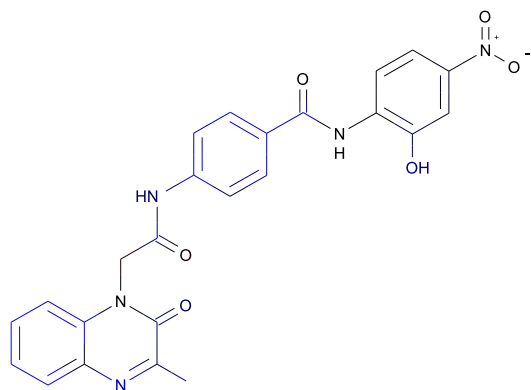

$C_{24}H_{19}N_5O_6$

Molecular Weight: 473.43756

ALogP: 2.113

Rotatable Bonds: 6

Acceptors: 7

Donors: 3

### Model Prediction

Prediction: 0.103

Unit: g/kg\_body\_weight

Mahalanobis Distance: 37.944

Mahalanobis Distance p-value: 1.02e-038

Mahalanobis Distance: The Mahalanobis distance (MD) is a generalization of the Euclidean distance that accounts for correlations among the X properties. It is calculated as the distance to the center of the training data. The larger the MD, the less trustworthy the prediction.

Mahalanobis Distance p-value: The p-value gives the fraction of training data with an MD greater than or equal to the one for the given sample, assuming normally distributed data. The smaller the p-value, the less trustworthy the prediction. For highly non-normal X properties (e.g., fingerprints), the MD p-value is wildly inaccurate.

### Structural Similar Compounds

| Name                        | GLIPIZIDE | C.I. ACID ORANGE 3 | C.I. ACID ORANGE 10 |
|-----------------------------|-----------|--------------------|---------------------|
| Structure                   |           |                    |                     |
| Actual Endpoint (-log C)    | 3.94991   | 3.20573            | 3.435               |
| Predicted Endpoint (-log C) | 3.95594   | 3.55956            | 3.28295             |
| Distance                    | 0.630     | 0.677              | 0.685               |
| Reference                   | NDA-17583 | NTP REPORT # 335   | NTP REPORT # 211    |

### Model Applicability

Unknown features are fingerprint features in the query molecule, but not found in the training set.

- All properties and OPS components are within expected ranges.
- Unknown FCFP\_2 feature: 5: [\*][O-]
- Unknown FCFP\_2 feature: -828984032: [\*][N+](=[\*])[c](:c[\*]):c[\*]
- Unknown FCFP\_2 feature: -1338588315: [\*]:[c](:[\*])[N+](=O)[O-]
- Unknown FCFP\_2 feature: 1872392852: [\*][N+](=O)[\*]
- Unknown FCFP\_2 feature: 260476081: [\*][N+](=[\*])[O-]
- Unknown ECFP\_6 feature: 1043790491: [\*][N+](=[\*])[\*]
- Unknown ECFP\_6 feature: 781519895: [\*][O-]
- Unknown ECFP\_6 feature: 1997021792: [\*]:[cH]:[cH]:[cH]:[\*]
- Unknown ECFP\_6 feature: -597295171: [\*][c](:[\*]):[c](:[cH]:[\*])N=[\*]
- Unknown ECFP\_6 feature: -1236953626: [\*]N([\*])[c](:[cH]:[\*]):[c]([\*]):[\*]
- Unknown ECFP\_6 feature: 2085698692: [\*]C(=N[c](:[\*]):[\*])[\*]
- Unknown ECFP\_6 feature: 1483289300: [\*]N=C(\C)/C(=[\*])[\*]
- Unknown ECFP\_6 feature: 1945129186: [\*]N([\*])C(=O)C(=[\*])[\*]
- Unknown ECFP\_6 feature: -661097313: [\*]CN(C(=[\*])[\*])[c](:[\*]):[\*]
- Unknown ECFP\_6 feature: -37698365: [\*]N([\*])CC(=[\*])[\*]
- Unknown ECFP\_6 feature: 1731843802: [\*]CC(=O)N[\*]
- Unknown ECFP\_6 feature: -177077903: [\*]N[c](:[cH]:[\*]):[cH]:[\*]
- Unknown ECFP\_6 feature: -175146122: [\*]C(=[\*])[c](:[cH]:[\*]):[cH]:[\*]
- Unknown ECFP\_6 feature: 1430169877: [\*]NC(=O)[c](:[\*]):[\*]
- Unknown ECFP\_6 feature: 1335108269: [\*]N[c](:[cH]:[\*]):[c]([\*]):[\*]

- 22. Unknown ECFP\_6 feature: -179073144: [\*][N+](=[\*])[c](:[cH]:[\*]):[cH]:[\*]
- 23. Unknown ECFP\_6 feature: 2019062761: [\*]:[c](:[\*])O
- 24. Unknown ECFP\_6 feature: -215026467: [\*]:[c](:[\*])[N+](=O)[O-]
- 25. Unknown ECFP\_6 feature: 2104376220: [\*][N+](=O)[\*]
- 26. Unknown ECFP\_6 feature: -659271057: [\*][N+](=[\*])[O-]

## Feature Contribution

### Top features for positive contribution

| Fingerprint | Bit/Smiles | Feature Structure                                                                                   | Score |
|-------------|------------|-----------------------------------------------------------------------------------------------------|-------|
| ECFP_6      | 1559650422 | 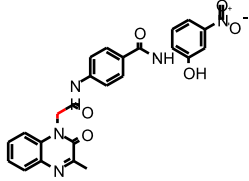<br>[*]C[*]      | 0.129 |
| FCFP_6      | 3          | <br>[*]N[*]      | 0.092 |
| ECFP_6      | 2099970318 | <br>[*]C(=O)[*] | 0.077 |

### Top Features for negative contribution

| Fingerprint | Bit/Smiles | Feature Structure | Score |
|-------------|------------|-------------------|-------|
|-------------|------------|-------------------|-------|

|        |            |                                                                                                                                                                   |        |
|--------|------------|-------------------------------------------------------------------------------------------------------------------------------------------------------------------|--------|
| FCFP_6 | 991735244  | 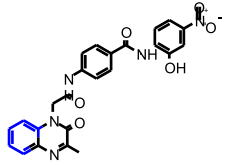 <p data-bbox="1386 284 1575 341">[*]:[c]1:[*]:[cH]:[cH]<br/>]:[cH]:[cH]:1</p> | -0.134 |
| ECFP_6 | 1564392544 |  <p data-bbox="1386 557 1575 613">[*]:[c]1:[*]:[cH]:[cH]<br/>]:[cH]:[cH]:1</p> | -0.133 |
| ECFP_6 | 2106656448 |  <p data-bbox="1417 852 1543 885">[*]C(=O)[*]</p>                              | -0.110 |

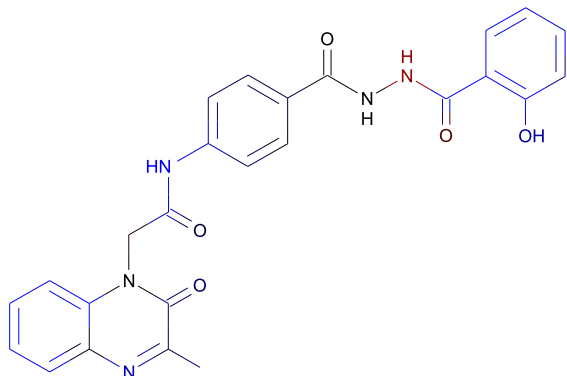

$C_{25}H_{21}N_5O_5$

Molecular Weight: 471.46474

ALogP: 1.475

Rotatable Bonds: 6

Acceptors: 6

Donors: 4

### Model Prediction

Prediction: 0.271

Unit: g/kg\_body\_weight

Mahalanobis Distance: 34.979

Mahalanobis Distance p-value: 1.35e-033

Mahalanobis Distance: The Mahalanobis distance (MD) is a generalization of the Euclidean distance that accounts for correlations among the X properties. It is calculated as the distance to the center of the training data. The larger the MD, the less trustworthy the prediction.

Mahalanobis Distance p-value: The p-value gives the fraction of training data with an MD greater than or equal to the one for the given sample, assuming normally distributed data. The smaller the p-value, the less trustworthy the prediction. For highly non-normal X properties (e.g., fingerprints), the MD p-value is wildly inaccurate.

### Structural Similar Compounds

| Name                        | GLIPIZIDE | GLYBURIDE | C.I. ACID ORANGE 10 |
|-----------------------------|-----------|-----------|---------------------|
| Structure                   |           |           |                     |
| Actual Endpoint (-log C)    | 3.94991   | 4.21661   | 3.435               |
| Predicted Endpoint (-log C) | 3.95594   | 4.21035   | 3.28295             |
| Distance                    | 0.631     | 0.736     | 0.788               |
| Reference                   | NDA-17583 | UPJ-26452 | NTP REPORT # 211    |

### Model Applicability

Unknown features are fingerprint features in the query molecule, but not found in the training set.

- All properties and OPS components are within expected ranges.
- Unknown ECFP\_6 feature: 1997021792: [\*]:[cH]:[cH]:[cH]:[\*]
- Unknown ECFP\_6 feature: -597295171: [\*][c](:[\*]):[c](:[cH]:[\*])N=[\*]
- Unknown ECFP\_6 feature: -1236953626: [\*]N([\*])[c](:[cH]:[\*]):[c]([\*]):[\*]
- Unknown ECFP\_6 feature: 2085698692: [\*]C(=N[c](:[\*]):[\*])[\*]
- Unknown ECFP\_6 feature: 1483289300: [\*]N=C(\C)/C(=[\*])[\*]
- Unknown ECFP\_6 feature: 1945129186: [\*]N([\*])C(=O)C(=[\*])[\*]
- Unknown ECFP\_6 feature: -661097313: [\*]CN(C(=[\*])[\*])[c](:[\*]):[\*]
- Unknown ECFP\_6 feature: 1635339976: [\*]NNC(=[\*])[\*]
- Unknown ECFP\_6 feature: 1430169877: [\*]NC(=O)[c](:[\*]):[\*]
- Unknown ECFP\_6 feature: 2019062761: [\*]:[c](:[\*])O
- Unknown ECFP\_6 feature: -37698365: [\*]N([\*])CC(=[\*])[\*]
- Unknown ECFP\_6 feature: 1731843802: [\*]CC(=O)N[\*]
- Unknown ECFP\_6 feature: -177077903: [\*]N[c](:[cH]:[\*]):[cH]:[\*]
- Unknown ECFP\_6 feature: -175146122: [\*]C(=[\*])[c](:[cH]:[\*]):[cH]:[\*]

### Feature Contribution

#### Top features for positive contribution

| Fingerprint | Bit/Smiles | Feature Structure | Score |
|-------------|------------|-------------------|-------|
|             |            |                   |       |

|                                               |                   |                                                                                                                                    |              |
|-----------------------------------------------|-------------------|------------------------------------------------------------------------------------------------------------------------------------|--------------|
| ECFP_6                                        | 1559650422        | 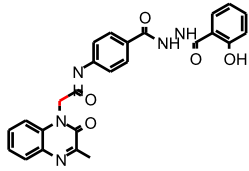<br>[*]C[*]                                     | 0.129        |
| FCFP_6                                        | 3                 | <br>[*]N[*]                                     | 0.092        |
| ECFP_6                                        | 2099970318        | <br>[*]C(=O)[*]                                 | 0.077        |
| <b>Top Features for negative contribution</b> |                   |                                                                                                                                    |              |
| <b>Fingerprint</b>                            | <b>Bit/Smiles</b> | <b>Feature Structure</b>                                                                                                           | <b>Score</b> |
| ECFP_6                                        | 1337040050        | <br>[*]C(=[*])[c](:[cH]:[<br>*]):[c]([*]):[*] | -0.158       |
| FCFP_6                                        | 991735244         | <br>[*]:[c]1:[*]:[cH]:[cH<br>]:[cH]:[cH]:1    | -0.134       |

|        |            |                                                                                                                                                      |        |
|--------|------------|------------------------------------------------------------------------------------------------------------------------------------------------------|--------|
| ECFP_6 | 1564392544 | 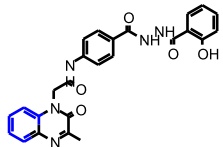<br><chem>O=C(Oc1ccc(NC(=O)N2CCN(C2)c3ccccc3)cc1)Nc4ccccc4</chem> | -0.133 |
|--------|------------|------------------------------------------------------------------------------------------------------------------------------------------------------|--------|

# Sorafenib

# TOPKAT\_Chronic\_LOAEL

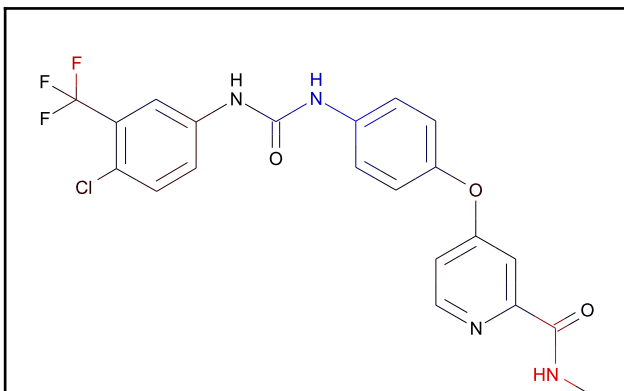

$C_{21}H_{16}ClF_3N_4O_3$   
 Molecular Weight: 464.82494  
 ALogP: 4.175  
 Rotatable Bonds: 6  
 Acceptors: 4  
 Donors: 3

## Model Prediction

Prediction: 0.005  
 Unit: g/kg\_body\_weight  
 Mahalanobis Distance: 29.988  
 Mahalanobis Distance p-value: 1.21e-024

Mahalanobis Distance: The Mahalanobis distance (MD) is a generalization of the Euclidean distance that accounts for correlations among the X properties. It is calculated as the distance to the center of the training data. The larger the MD, the less trustworthy the prediction.

Mahalanobis Distance p-value: The p-value gives the fraction of training data with an MD greater than or equal to the one for the given sample, assuming normally distributed data. The smaller the p-value, the less trustworthy the prediction. For highly non-normal X properties (e.g., fingerprints), the MD p-value is wildly inaccurate.

## Structural Similar Compounds

| Name                        | GLYBURIDE | D & C RED 9      | SODIUM ACIFLUORFEN              |
|-----------------------------|-----------|------------------|---------------------------------|
| Structure                   |           |                  |                                 |
| Actual Endpoint (-log C)    | 4.21661   | 3.87715          | 4.16036                         |
| Predicted Endpoint (-log C) | 4.21035   | 3.6546           | 4.65915                         |
| Distance                    | 0.636     | 0.722            | 0.736                           |
| Reference                   | UPJ-26452 | NTP REPORT # 225 | EPA COVER SHEET 0192;891101;(1) |

## Model Applicability

Unknown features are fingerprint features in the query molecule, but not found in the training set.

- All properties and OPS components are within expected ranges.
- Unknown ECFP\_6 feature: -1046436026: [\*]F
- Unknown ECFP\_6 feature: 1413420509: [\*]C(=[\*])[c](:[cH]:[\*]):n:[\*]
- Unknown ECFP\_6 feature: 1996163143: [\*]:[cH]:[cH]:n:[\*]
- Unknown ECFP\_6 feature: -677309799: [\*][c](:[\*]):n:[cH]:[\*]
- Unknown ECFP\_6 feature: 1430169877: [\*]NC(=O)[c](:[\*]):[\*]
- Unknown ECFP\_6 feature: 1338334141: [\*]C(=[\*])NC
- Unknown ECFP\_6 feature: 1305253718: [\*]:[c](:[\*])O[c](:[\*]):[\*]
- Unknown ECFP\_6 feature: -177077903: [\*]N[c](:[cH]:[\*]):[cH]:[\*]
- Unknown ECFP\_6 feature: -649580166: [\*]NC(=O)N[\*]
- Unknown ECFP\_6 feature: 1336678434: [\*][c](:[\*]):[c](:[cH]:[\*])C([\*])([\*])[\*]
- Unknown ECFP\_6 feature: -1952889961: [\*]:[c](:[\*])C(F)(F)F
- Unknown ECFP\_6 feature: 226796801: [\*]C([\*])([\*])F
- Unknown ECFP\_6 feature: 99947387: [\*]:[c](:[\*])Cl
- Unknown ECFP\_6 feature: 864287155: [\*]NC

## Feature Contribution

### Top features for positive contribution

| Fingerprint | Bit/Smiles | Feature Structure | Score |
|-------------|------------|-------------------|-------|
|-------------|------------|-------------------|-------|

|                                               |                   |                                                                                                                                 |              |
|-----------------------------------------------|-------------------|---------------------------------------------------------------------------------------------------------------------------------|--------------|
| ECFP_6                                        | -176455838        | 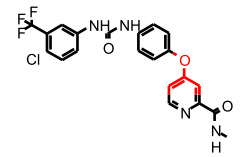<br><chem>[*]O[c](-[cH]:[*]):[cH]:[*]</chem> | 0.106        |
| FCFP_6                                        | 32                | <br><chem>[*]Cl</chem>                       | 0.101        |
| FCFP_6                                        | 3                 | <br><chem>[*]N[*]</chem>                     | 0.092        |
| <b>Top Features for negative contribution</b> |                   |                                                                                                                                 |              |
| <b>Fingerprint</b>                            | <b>Bit/Smiles</b> | <b>Feature Structure</b>                                                                                                        | <b>Score</b> |
| FCFP_6                                        | 1                 | <br><chem>[*]=O</chem>                     | -0.102       |
| ECFP_6                                        | -1236483485       | <br><chem>[*]C(=[*])N[c](-[*]):[*]</chem>  | -0.075       |



|        |           |                                                                                                                                         |        |
|--------|-----------|-----------------------------------------------------------------------------------------------------------------------------------------|--------|
| FCFP_6 | 203677720 | 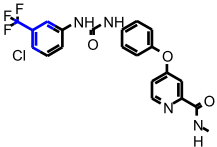<br><chem>*C(=*)[c](-[cH]:[*]<br/>*):[cH]:[*]</chem> | -0.071 |
|--------|-----------|-----------------------------------------------------------------------------------------------------------------------------------------|--------|

15a

TOPKAT\_Rat\_Maximum\_Tolerated\_Dose\_Feed

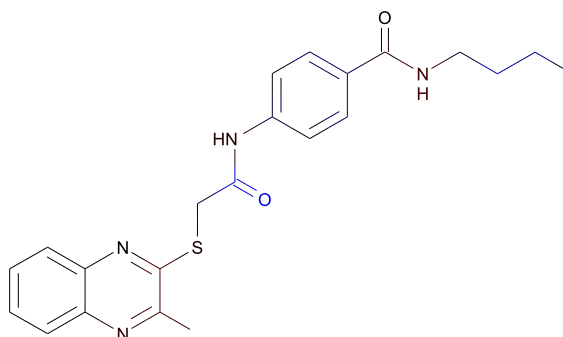C<sub>22</sub>H<sub>24</sub>N<sub>4</sub>O<sub>2</sub>S

Molecular Weight: 408.51656

ALogP: 3.83

Rotatable Bonds: 8

Acceptors: 5

Donors: 2

### Model Prediction

Prediction: 0.132

Unit: g/kg\_body\_weight

Mahalanobis Distance: 11.557

Mahalanobis Distance p-value: 8.5e-008

Mahalanobis Distance: The Mahalanobis distance (MD) is a generalization of the Euclidean distance that accounts for correlations among the X properties. It is calculated as the distance to the center of the training data. The larger the MD, the less trustworthy the prediction.

Mahalanobis Distance p-value: The p-value gives the fraction of training data with an MD greater than or equal to the one for the given sample, assuming normally distributed data. The smaller the p-value, the less trustworthy the prediction. For highly non-normal X properties (e.g., fingerprints), the MD p-value is wildly inaccurate.

### Structural Similar Compounds

| Name                        | SALICYLAZOSULFAPYRIDINE | DISPERSE YELLOW 3 | FUROSEMIDE     |
|-----------------------------|-------------------------|-------------------|----------------|
| Structure                   |                         |                   |                |
| Actual Endpoint (-log C)    | 3.375                   | 2.77703           | 4.04236        |
| Predicted Endpoint (-log C) | 2.80292                 | 2.80195           | 2.8614         |
| Distance                    | 0.750                   | 0.754             | 0.769          |
| Reference                   | NCI/NTP TR-457          | NCI/NTP TR-222    | NCI/NTP TR-356 |

### Model Applicability

Unknown features are fingerprint features in the query molecule, but not found in the training set.

1. OPS PC8 out of range. Value: 4.0355. Training min, max, SD, explained variance: -3.8548, 3.9137, 1.331, 0.0400.
2. OPS PC9 out of range. Value: 3.781. Training min, max, SD, explained variance: -2.8548, 3.3954, 1.263, 0.0360.
3. OPS PC14 out of range. Value: 3.5834. Training min, max, SD, explained variance: -2.0656, 3.3808, 1.011, 0.0231.

### Feature Contribution

#### Top features for positive contribution

| Fingerprint | Bit/Smiles | Feature Structure                | Score |
|-------------|------------|----------------------------------|-------|
| FCFP_2      | -885550502 | <br><chem>[*]CNC(=[*])[*]</chem> | 0.115 |

|                                               |                   |                                                                                                                                         |              |
|-----------------------------------------------|-------------------|-----------------------------------------------------------------------------------------------------------------------------------------|--------------|
| FCFP_2                                        | 1036089772        | 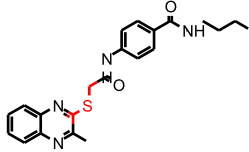<br><chem>[*]CS[c](:[*]):[*]</chem>                  | 0.075        |
| FCFP_2                                        | 3                 | <br><chem>[*]N[*]</chem>                             | 0.074        |
| <b>Top Features for negative contribution</b> |                   |                                                                                                                                         |              |
| <b>Fingerprint</b>                            | <b>Bit/Smiles</b> | <b>Feature Structure</b>                                                                                                                | <b>Score</b> |
| FCFP_2                                        | -1272798659       | <br><chem>[*]CCC[*]</chem>                           | -0.111       |
| FCFP_2                                        | 1872154524        | <br><chem>[*]C(=O)[*]</chem>                       | -0.105       |
| FCFP_2                                        | 203677720         | <br><chem>[*]C(=[*])[c](:[cH]:[*]):[cH]:[*]</chem> | -0.083       |



15b

TOPKAT\_Rat\_Maximum\_Tolerated\_Dose\_Feed

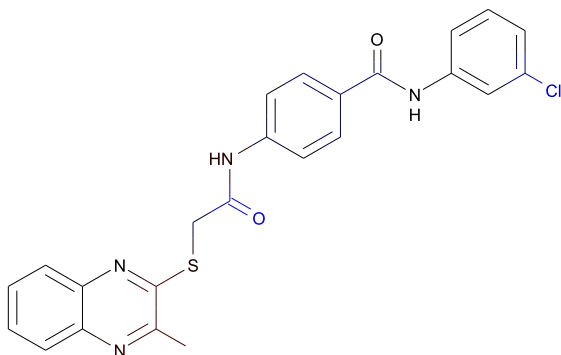C<sub>24</sub>H<sub>19</sub>ClN<sub>4</sub>O<sub>2</sub>S

Molecular Weight: 462.95126

ALogP: 4.743

Rotatable Bonds: 6

Acceptors: 5

Donors: 2

### Model Prediction

Prediction: 0.123

Unit: g/kg\_body\_weight

Mahalanobis Distance: 11.191

Mahalanobis Distance p-value: 4e-007

Mahalanobis Distance: The Mahalanobis distance (MD) is a generalization of the Euclidean distance that accounts for correlations among the X properties. It is calculated as the distance to the center of the training data. The larger the MD, the less trustworthy the prediction.

Mahalanobis Distance p-value: The p-value gives the fraction of training data with an MD greater than or equal to the one for the given sample, assuming normally distributed data. The smaller the p-value, the less trustworthy the prediction. For highly non-normal X properties (e.g., fingerprints), the MD p-value is wildly inaccurate.

### Structural Similar Compounds

| Name                        | C.I.PIGMENT RED 3 | SALICYLAZOSULFAPYRIDINE | C.I.PIGMENT RED 23 |
|-----------------------------|-------------------|-------------------------|--------------------|
| Structure                   |                   |                         |                    |
| Actual Endpoint (-log C)    | 2.65635           | 3.375                   | 2.30052            |
| Predicted Endpoint (-log C) | 2.97957           | 2.80292                 | 3.55333            |
| Distance                    | 0.791             | 0.809                   | 0.844              |
| Reference                   | NCI/NTP TR-407    | NCI/NTP TR-457          | NCI/NTP TR-411     |

### Model Applicability

Unknown features are fingerprint features in the query molecule, but not found in the training set.

1. All properties and OPS components are within expected ranges.

### Feature Contribution

#### Top features for positive contribution

| Fingerprint | Bit/Smiles | Feature Structure                  | Score |
|-------------|------------|------------------------------------|-------|
| FCFP_2      | 1036089772 | <br><chem>[*]CS[c]([*]):[*]</chem> | 0.075 |

| FCFP_2                                 | 3          | 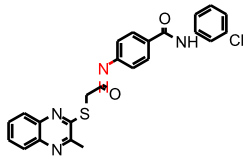<br>[*]N[*]                                 | 0.074  |
|----------------------------------------|------------|--------------------------------------------------------------------------------------------------------------------------------|--------|
| FCFP_2                                 | 136120670  | <br>[*]:[c](:[*])C                          | 0.064  |
| Top Features for negative contribution |            |                                                                                                                                |        |
| Fingerprint                            | Bit/Smiles | Feature Structure                                                                                                              | Score  |
| FCFP_2                                 | 71476542   | <br>[*]:[c](:[*])Cl                         | -0.134 |
| FCFP_2                                 | 1872154524 | <br>[*]C(=O)[*]                           | -0.105 |
| FCFP_2                                 | 203677720  | <br>[*]C(=[*])[c](:[cH]:[<br>*]):[cH]:[*] | -0.083 |



15c

TOPKAT\_Rat\_Maximum\_Tolerated\_Dose\_Feed

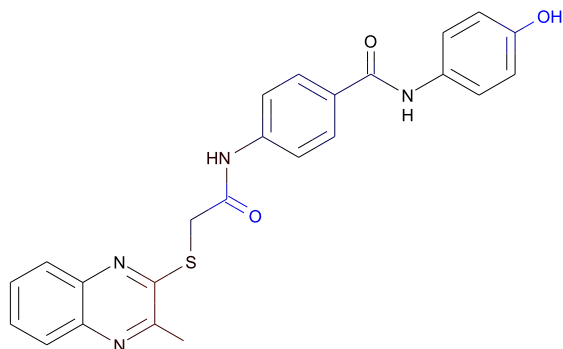C<sub>24</sub>H<sub>20</sub>N<sub>4</sub>O<sub>3</sub>S

Molecular Weight: 444.5056

ALogP: 3.836

Rotatable Bonds: 6

Acceptors: 6

Donors: 3

### Model Prediction

Prediction: 0.333

Unit: g/kg\_body\_weight

Mahalanobis Distance: 10.846

Mahalanobis Distance p-value: 1.65e-006

Mahalanobis Distance: The Mahalanobis distance (MD) is a generalization of the Euclidean distance that accounts for correlations among the X properties. It is calculated as the distance to the center of the training data. The larger the MD, the less trustworthy the prediction.

Mahalanobis Distance p-value: The p-value gives the fraction of training data with an MD greater than or equal to the one for the given sample, assuming normally distributed data. The smaller the p-value, the less trustworthy the prediction. For highly non-normal X properties (e.g., fingerprints), the MD p-value is wildly inaccurate.

### Structural Similar Compounds

| Name                        | SALICYLAZOSULFAPYRIDINE | C.I.PIGMENT RED 23 | FUROSEMIDE     |
|-----------------------------|-------------------------|--------------------|----------------|
| Structure                   |                         |                    |                |
| Actual Endpoint (-log C)    | 3.375                   | 2.30052            | 4.04236        |
| Predicted Endpoint (-log C) | 2.80292                 | 3.55333            | 2.8614         |
| Distance                    | 0.582                   | 0.670              | 0.818          |
| Reference                   | NCI/NTP TR-457          | NCI/NTP TR-411     | NCI/NTP TR-356 |

### Model Applicability

Unknown features are fingerprint features in the query molecule, but not found in the training set.

1. All properties and OPS components are within expected ranges.

### Feature Contribution

#### Top features for positive contribution

| Fingerprint | Bit/Smiles | Feature Structure                  | Score |
|-------------|------------|------------------------------------|-------|
| FCFP_2      | 1036089772 | <br><chem>[*]CS[c]([*]):[*]</chem> | 0.075 |



|                                               |                   |                                                                                                         |              |
|-----------------------------------------------|-------------------|---------------------------------------------------------------------------------------------------------|--------------|
| FCFP_2                                        | 3                 | 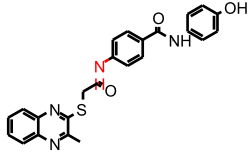<br>[*]N[*]          | 0.074        |
| FCFP_2                                        | 136120670         | <br>[*]:[c](:[*])C   | 0.064        |
| <b>Top Features for negative contribution</b> |                   |                                                                                                         |              |
| <b>Fingerprint</b>                            | <b>Bit/Smiles</b> | <b>Feature Structure</b>                                                                                | <b>Score</b> |
| FCFP_2                                        | 7                 | <br>[*]O             | -0.214       |
| FCFP_2                                        | -549108873        | <br>[*]:[c](:[*])O | -0.127       |
| FCFP_2                                        | 1872154524        | <br>[*]C(=O)[*]    | -0.105       |



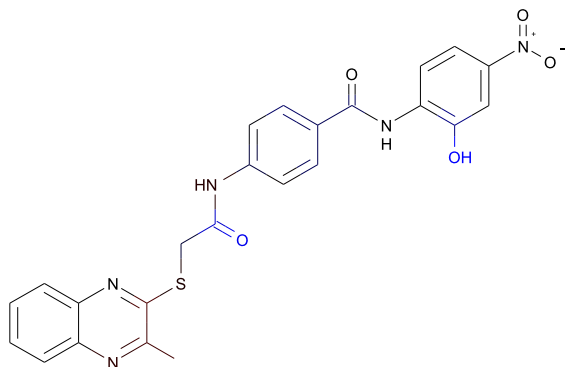

$C_{24}H_{19}N_5O_5S$

Molecular Weight: 489.50316

ALogP: 3.731

Rotatable Bonds: 7

Acceptors: 8

Donors: 3

### Model Prediction

Prediction: 0.244

Unit: g/kg\_body\_weight

Mahalanobis Distance: 11.389

Mahalanobis Distance p-value: 1.74e-007

Mahalanobis Distance: The Mahalanobis distance (MD) is a generalization of the Euclidean distance that accounts for correlations among the X properties. It is calculated as the distance to the center of the training data. The larger the MD, the less trustworthy the prediction.

Mahalanobis Distance p-value: The p-value gives the fraction of training data with an MD greater than or equal to the one for the given sample, assuming normally distributed data. The smaller the p-value, the less trustworthy the prediction. For highly non-normal X properties (e.g., fingerprints), the MD p-value is wildly inaccurate.

### Structural Similar Compounds

| Name                        | C.I.PIGMENT RED 23 | SALICYLAZOSULFAPYRIDINE | FUROSEMIDE     |
|-----------------------------|--------------------|-------------------------|----------------|
| Structure                   |                    |                         |                |
| Actual Endpoint (-log C)    | 2.30052            | 3.375                   | 4.04236        |
| Predicted Endpoint (-log C) | 3.55333            | 2.80292                 | 2.8614         |
| Distance                    | 0.513              | 0.620                   | 0.962          |
| Reference                   | NCI/NTP TR-411     | NCI/NTP TR-457          | NCI/NTP TR-356 |

### Model Applicability

Unknown features are fingerprint features in the query molecule, but not found in the training set.

1. All properties and OPS components are within expected ranges.
2. Unknown FCFP\_2 feature: 8: [\*][N+](=[\*])[\*]
3. Unknown FCFP\_2 feature: 5: [\*][O-]
4. Unknown FCFP\_2 feature: -828984032: [\*][N+](=[\*])[c](:c:[\*]):c:[\*]
5. Unknown FCFP\_2 feature: -1338588315: [\*]:c[:[\*]][N+](=O)[O-]
6. Unknown FCFP\_2 feature: 1872392852: [\*][N+](=O)[\*]
7. Unknown FCFP\_2 feature: 260476081: [\*][N+](=[\*])[O-]

### Feature Contribution

#### Top features for positive contribution

| Fingerprint | Bit/Smiles | Feature Structure | Score |
|-------------|------------|-------------------|-------|
|             |            |                   |       |

|                                               |                   |                                                                                                                        |              |
|-----------------------------------------------|-------------------|------------------------------------------------------------------------------------------------------------------------|--------------|
| FCFP_2                                        | 1036089772        | 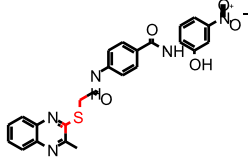<br><chem>[*]CS[c](:[*]):[*]</chem> | 0.075        |
| FCFP_2                                        | 3                 | <br><chem>[*]N[*]</chem>            | 0.074        |
| FCFP_2                                        | 136120670         | <br><chem>[*]:[c](:[*])C</chem>     | 0.064        |
| <b>Top Features for negative contribution</b> |                   |                                                                                                                        |              |
| <b>Fingerprint</b>                            | <b>Bit/Smiles</b> | <b>Feature Structure</b>                                                                                               | <b>Score</b> |
| FCFP_2                                        | 7                 | <br><chem>[*]O</chem>             | -0.214       |
| FCFP_2                                        | -549108873        | <br><chem>[*]:[c](:[*])O</chem>   | -0.127       |

|        |            |                                                                                                    |        |
|--------|------------|----------------------------------------------------------------------------------------------------|--------|
| FCFP_2 | 1872154524 | 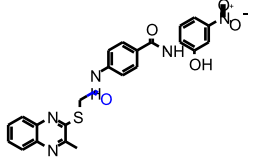<br>[*]C(=O)[*] | -0.105 |
|--------|------------|----------------------------------------------------------------------------------------------------|--------|

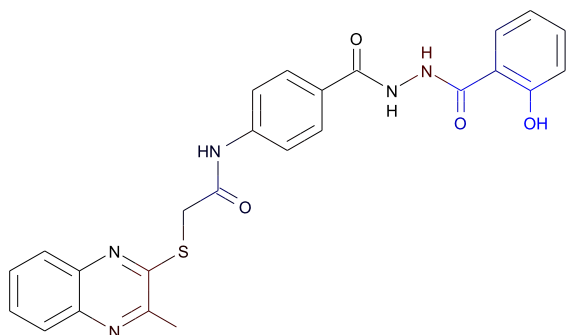

$C_{25}H_{21}N_5O_4S$

Molecular Weight: 487.53034

ALogP: 3.093

Rotatable Bonds: 7

Acceptors: 7

Donors: 4

### Model Prediction

Prediction: 0.364

Unit: g/kg\_body\_weight

Mahalanobis Distance: 11.452

Mahalanobis Distance p-value: 1.33e-007

Mahalanobis Distance: The Mahalanobis distance (MD) is a generalization of the Euclidean distance that accounts for correlations among the X properties. It is calculated as the distance to the center of the training data. The larger the MD, the less trustworthy the prediction.

Mahalanobis Distance p-value: The p-value gives the fraction of training data with an MD greater than or equal to the one for the given sample, assuming normally distributed data. The smaller the p-value, the less trustworthy the prediction. For highly non-normal X properties (e.g., fingerprints), the MD p-value is wildly inaccurate.

### Structural Similar Compounds

| Name                        | SALICYLAZOSULFAPYRIDINE | C.I.PIGMENT RED 23 | FUROSEMIDE     |
|-----------------------------|-------------------------|--------------------|----------------|
| Structure                   |                         |                    |                |
| Actual Endpoint (-log C)    | 3.375                   | 2.30052            | 4.04236        |
| Predicted Endpoint (-log C) | 2.80292                 | 3.55333            | 2.8614         |
| Distance                    | 0.599                   | 0.657              | 0.880          |
| Reference                   | NCI/NTP TR-457          | NCI/NTP TR-411     | NCI/NTP TR-356 |

### Model Applicability

Unknown features are fingerprint features in the query molecule, but not found in the training set.

1. All properties and OPS components are within expected ranges.
2. Unknown FCFP\_2 feature: -885461129: [\*]NNC(=[\*])[\*]

### Feature Contribution

#### Top features for positive contribution

| Fingerprint | Bit/Smiles | Feature Structure      | Score |
|-------------|------------|------------------------|-------|
| FCFP_2      | 1036089772 | <br>[*]CS[c](:[*]):[*] | 0.075 |

| FCFP_2                                 | 3          | 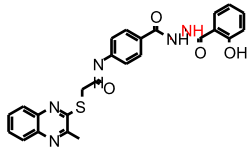<br>[*]N[*]          | 0.074  |
|----------------------------------------|------------|---------------------------------------------------------------------------------------------------------|--------|
| FCFP_2                                 | 136120670  | <br>[*]:[c](:[*])C   | 0.064  |
| Top Features for negative contribution |            |                                                                                                         |        |
| Fingerprint                            | Bit/Smiles | Feature Structure                                                                                       | Score  |
| FCFP_2                                 | 7          | <br>[*]O             | -0.214 |
| FCFP_2                                 | -549108873 | <br>[*]:[c](:[*])O | -0.127 |
| FCFP_2                                 | 1872154524 | <br>[*]C(=O)[*]    | -0.105 |





17a

TOPKAT\_Rat\_Maximum\_Tolerated\_Dose\_Feed

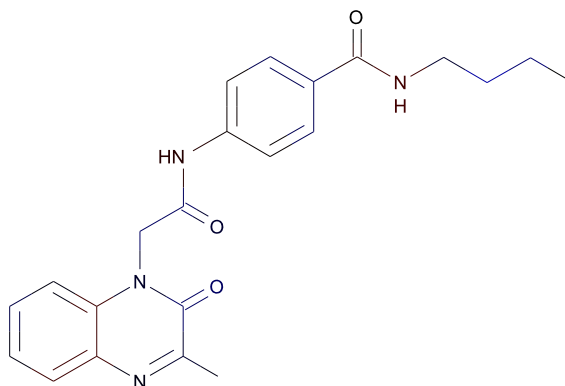C<sub>22</sub>H<sub>24</sub>N<sub>4</sub>O<sub>3</sub>

Molecular Weight: 392.45096

ALogP: 2.212

Rotatable Bonds: 7

Acceptors: 4

Donors: 2

### Model Prediction

Prediction: 0.097

Unit: g/kg\_body\_weight

Mahalanobis Distance: 11.056

Mahalanobis Distance p-value: 7e-007

Mahalanobis Distance: The Mahalanobis distance (MD) is a generalization of the Euclidean distance that accounts for correlations among the X properties. It is calculated as the distance to the center of the training data. The larger the MD, the less trustworthy the prediction.

Mahalanobis Distance p-value: The p-value gives the fraction of training data with an MD greater than or equal to the one for the given sample, assuming normally distributed data. The smaller the p-value, the less trustworthy the prediction. For highly non-normal X properties (e.g., fingerprints), the MD p-value is wildly inaccurate.

### Structural Similar Compounds

| Name                        | TOLBUTAMIDE    | DISPERSE YELLOW 3 | ACETOHEXAMIDE  |
|-----------------------------|----------------|-------------------|----------------|
| Structure                   |                |                   |                |
| Actual Endpoint (-log C)    | 2.3985         | 2.77703           | 2.55683        |
| Predicted Endpoint (-log C) | 3.32272        | 2.80195           | 3.62413        |
| Distance                    | 0.596          | 0.607             | 0.609          |
| Reference                   | NCI/NTP TR-031 | NCI/NTP TR-222    | NCI/NTP TR-050 |

### Model Applicability

Unknown features are fingerprint features in the query molecule, but not found in the training set.

- OPS PC9 out of range. Value: 3.6764. Training min, max, SD, explained variance: -2.8548, 3.3954, 1.263, 0.0360.

### Feature Contribution

#### Top features for positive contribution

| Fingerprint | Bit/Smiles | Feature Structure                | Score |
|-------------|------------|----------------------------------|-------|
| FCFP_2      | -885550502 | <br><chem>[*]CNC(=[*])[*]</chem> | 0.115 |

|                                               |                   |                                                                                                                                         |              |
|-----------------------------------------------|-------------------|-----------------------------------------------------------------------------------------------------------------------------------------|--------------|
| FCFP_2                                        | 3                 | 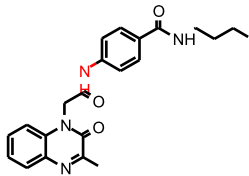<br><chem>[*]N[*]</chem>                             | 0.074        |
| FCFP_2                                        | 332760439         | <br><chem>[*][c](:[*]):[c](:[cH]:[*])N=[*]</chem>    | 0.061        |
| <b>Top Features for negative contribution</b> |                   |                                                                                                                                         |              |
| <b>Fingerprint</b>                            | <b>Bit/Smiles</b> | <b>Feature Structure</b>                                                                                                                | <b>Score</b> |
| FCFP_2                                        | -1272798659       | <br><chem>[*]CCC[*]</chem>                           | -0.111       |
| FCFP_2                                        | 1872154524        | <br><chem>[*]C(=O)[*]</chem>                       | -0.105       |
| FCFP_2                                        | 203677720         | <br><chem>[*]C(=[*])[c](:[cH]:[*]):[cH]:[*]</chem> | -0.083       |



17b

TOPKAT\_Rat\_Maximum\_Tolerated\_Dose\_Feed

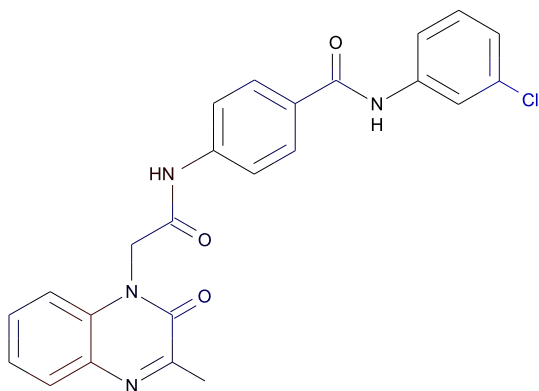
 $C_{24}H_{19}ClN_4O_3$ 

Molecular Weight: 446.88566

ALogP: 3.125

Rotatable Bonds: 5

Acceptors: 4

Donors: 2

### Model Prediction

Prediction: 0.096

Unit: g/kg\_body\_weight

Mahalanobis Distance: 10.657

Mahalanobis Distance p-value: 3.54e-006

Mahalanobis Distance: The Mahalanobis distance (MD) is a generalization of the Euclidean distance that accounts for correlations among the X properties. It is calculated as the distance to the center of the training data. The larger the MD, the less trustworthy the prediction.

Mahalanobis Distance p-value: The p-value gives the fraction of training data with an MD greater than or equal to the one for the given sample, assuming normally distributed data. The smaller the p-value, the less trustworthy the prediction. For highly non-normal X properties (e.g., fingerprints), the MD p-value is wildly inaccurate.

### Structural Similar Compounds

| Name                        | CHLORBENZILATE | DISPERSE YELLOW 3 | OXAZEPAM       |
|-----------------------------|----------------|-------------------|----------------|
| Structure                   |                |                   |                |
| Actual Endpoint (-log C)    | 3.38252        | 2.77703           | 3.05262        |
| Predicted Endpoint (-log C) | 3.27894        | 2.80195           | 3.13073        |
| Distance                    | 0.650          | 0.661             | 0.680          |
| Reference                   | NCI/NTP TR-75  | NCI/NTP TR-222    | NCI/NTP TR-468 |

### Model Applicability

Unknown features are fingerprint features in the query molecule, but not found in the training set.

- All properties and OPS components are within expected ranges.

### Feature Contribution

#### Top features for positive contribution

| Fingerprint | Bit/Smiles | Feature Structure | Score |
|-------------|------------|-------------------|-------|
| FCFP_2      | 3          | <br>[*]N[*]       | 0.074 |

|                                               |                   |                                                                                                                                         |              |
|-----------------------------------------------|-------------------|-----------------------------------------------------------------------------------------------------------------------------------------|--------------|
| FCFP_2                                        | 332760439         | 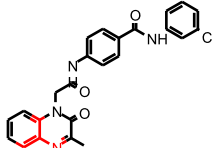<br><chem>[*][c](:[*]):[c](:[cH]:[*])N=[*]</chem>    | 0.061        |
| FCFP_2                                        | 565998553         | <br><chem>[*]N([*])C(=O)C(=[*])</chem>               | 0.008        |
| <b>Top Features for negative contribution</b> |                   |                                                                                                                                         |              |
| <b>Fingerprint</b>                            | <b>Bit/Smiles</b> | <b>Feature Structure</b>                                                                                                                | <b>Score</b> |
| FCFP_2                                        | 71476542          | <br><chem>[*]:[c](:[*])Cl</chem>                     | -0.134       |
| FCFP_2                                        | 1872154524        | <br><chem>[*]C(=O)[*]</chem>                        | -0.105       |
| FCFP_2                                        | 203677720         | <br><chem>[*]C(=[*])[c](:[cH]:[*]):[cH]:[*]</chem> | -0.083       |



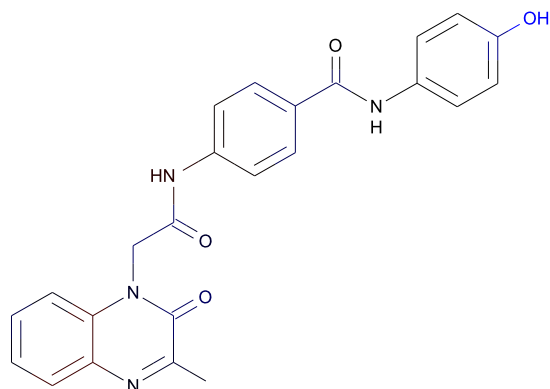
 $C_{24}H_{20}N_4O_4$ 

Molecular Weight: 428.44

ALogP: 2.218

Rotatable Bonds: 5

Acceptors: 5

Donors: 3

### Model Prediction

Prediction: 0.259

Unit: g/kg\_body\_weight

Mahalanobis Distance: 10.670

Mahalanobis Distance p-value: 3.35e-006

Mahalanobis Distance: The Mahalanobis distance (MD) is a generalization of the Euclidean distance that accounts for correlations among the X properties. It is calculated as the distance to the center of the training data. The larger the MD, the less trustworthy the prediction.

Mahalanobis Distance p-value: The p-value gives the fraction of training data with an MD greater than or equal to the one for the given sample, assuming normally distributed data. The smaller the p-value, the less trustworthy the prediction. For highly non-normal X properties (e.g., fingerprints), the MD p-value is wildly inaccurate.

### Structural Similar Compounds

| Name                        | DISPERSE YELLOW 3 | SALICYLAZOSULFAPYRIDINE | FUROSEMIDE     |
|-----------------------------|-------------------|-------------------------|----------------|
| Structure                   |                   |                         |                |
| Actual Endpoint (-log C)    | 2.77703           | 3.375                   | 4.04236        |
| Predicted Endpoint (-log C) | 2.80195           | 2.80292                 | 2.8614         |
| Distance                    | 0.639             | 0.657                   | 0.683          |
| Reference                   | NCI/NTP TR-222    | NCI/NTP TR-457          | NCI/NTP TR-356 |

### Model Applicability

Unknown features are fingerprint features in the query molecule, but not found in the training set.

- All properties and OPS components are within expected ranges.

### Feature Contribution

#### Top features for positive contribution

| Fingerprint | Bit/Smiles | Feature Structure | Score |
|-------------|------------|-------------------|-------|
| FCFP_2      | 3          | <br>[*]N[*]       | 0.074 |

|                                               |                   |                                                                                                                                      |              |
|-----------------------------------------------|-------------------|--------------------------------------------------------------------------------------------------------------------------------------|--------------|
| FCFP_2                                        | 332760439         | 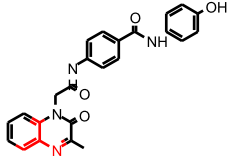<br><chem>[*][c](:[*]):[c](:[cH]:[*])N=[*]</chem> | 0.061        |
| FCFP_2                                        | 565998553         | <br><chem>[*]N([*])C(=O)C=[*]</chem>              | 0.008        |
| <b>Top Features for negative contribution</b> |                   |                                                                                                                                      |              |
| <b>Fingerprint</b>                            | <b>Bit/Smiles</b> | <b>Feature Structure</b>                                                                                                             | <b>Score</b> |
| FCFP_2                                        | 7                 | <br><chem>[*]O</chem>                             | -0.214       |
| FCFP_2                                        | 549108873         | <br><chem>[*]:[c](:[*])O</chem>                 | -0.127       |
| FCFP_2                                        | 1872154524        | <br><chem>[*]C(=O)[*]</chem>                    | -0.105       |





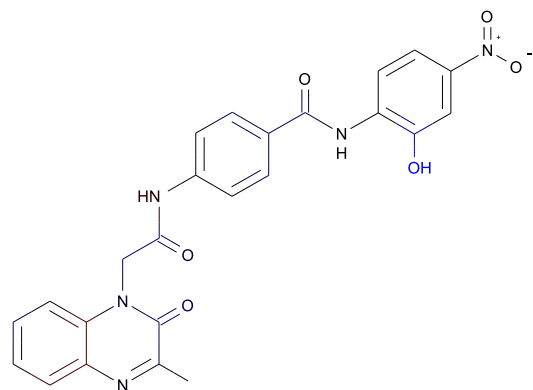

$C_{24}H_{19}N_5O_6$

Molecular Weight: 473.43756

ALogP: 2.113

Rotatable Bonds: 6

Acceptors: 7

Donors: 3

### Model Prediction

Prediction: 0.191

Unit: g/kg\_body\_weight

Mahalanobis Distance: 11.201

Mahalanobis Distance p-value: 3.84e-007

Mahalanobis Distance: The Mahalanobis distance (MD) is a generalization of the Euclidean distance that accounts for correlations among the X properties. It is calculated as the distance to the center of the training data. The larger the MD, the less trustworthy the prediction.

Mahalanobis Distance p-value: The p-value gives the fraction of training data with an MD greater than or equal to the one for the given sample, assuming normally distributed data. The smaller the p-value, the less trustworthy the prediction. For highly non-normal X properties (e.g., fingerprints), the MD p-value is wildly inaccurate.

### Structural Similar Compounds

| Name                        | SALICYLAZOSULFAPYRIDINE | C.I.PIGMENT RED 23 | FUROSEMIDE     |
|-----------------------------|-------------------------|--------------------|----------------|
| Structure                   |                         |                    |                |
| Actual Endpoint (-log C)    | 3.375                   | 2.30052            | 4.04236        |
| Predicted Endpoint (-log C) | 2.80292                 | 3.55333            | 2.8614         |
| Distance                    | 0.525                   | 0.720              | 0.755          |
| Reference                   | NCI/NTP TR-457          | NCI/NTP TR-411     | NCI/NTP TR-356 |

### Model Applicability

Unknown features are fingerprint features in the query molecule, but not found in the training set.

1. All properties and OPS components are within expected ranges.
2. Unknown FCFP\_2 feature: 8: [\*][N+](=[\*])[\*]
3. Unknown FCFP\_2 feature: 5: [\*][O-]
4. Unknown FCFP\_2 feature: -828984032: [\*][N+](=[\*])[c](:c:[\*]):c:[\*]
5. Unknown FCFP\_2 feature: -1338588315: [\*]:c[(:[\*])[N+](=O)[O-]
6. Unknown FCFP\_2 feature: 1872392852: [\*][N+](=O)[\*]
7. Unknown FCFP\_2 feature: 260476081: [\*][N+](=[\*])[O-]

### Feature Contribution

#### Top features for positive contribution

| Fingerprint | Bit/Smiles | Feature Structure | Score |
|-------------|------------|-------------------|-------|
|             |            |                   |       |

|        |           |                                                                                                                             |       |
|--------|-----------|-----------------------------------------------------------------------------------------------------------------------------|-------|
| FCFP_2 | 3         | 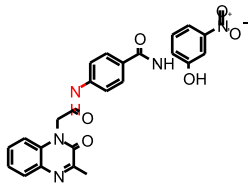<br>[*]N[*]                              | 0.074 |
| FCFP_2 | 332760439 | <br>[*][c](:[*]):[c](:[cH<br>]:[*])N=[*] | 0.061 |
| FCFP_2 | 565998553 | <br>[*]N[*]C(=O)C(=[*])<br>[*]           | 0.008 |

### Top Features for negative contribution

| Fingerprint | Bit/Smiles | Feature Structure                                                                                       | Score  |
|-------------|------------|---------------------------------------------------------------------------------------------------------|--------|
| FCFP_2      | 7          | 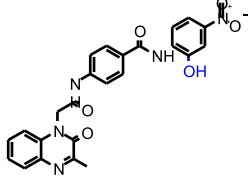<br>[*]O           | -0.214 |
| FCFP_2      | -549108873 | <br>[*]:[c](:[*])O | -0.127 |

|        |            |                                                                                                                 |        |
|--------|------------|-----------------------------------------------------------------------------------------------------------------|--------|
| FCFP_2 | 1872154524 | 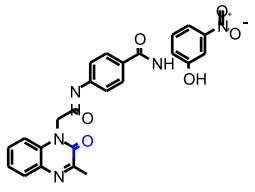<br><chem>[*]C(=O)[*]</chem> | -0.105 |
|--------|------------|-----------------------------------------------------------------------------------------------------------------|--------|

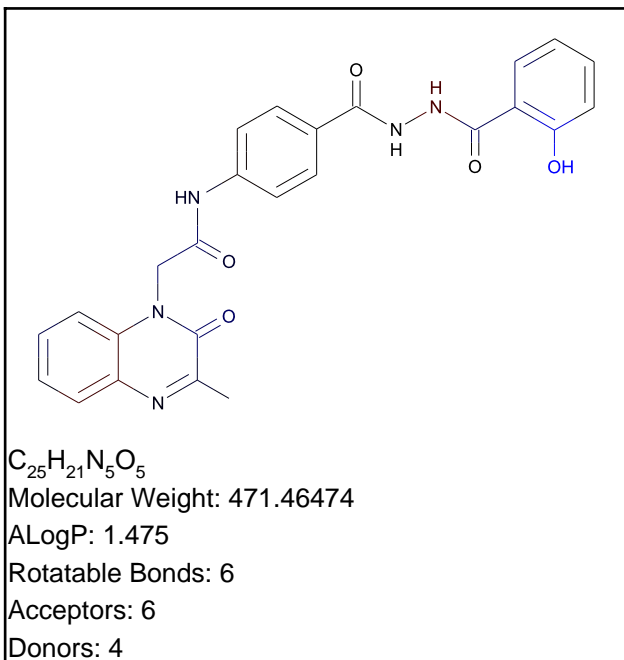

### Model Prediction

Prediction: 0.284

Unit: g/kg\_body\_weight

Mahalanobis Distance: 11.529

Mahalanobis Distance p-value: 9.57e-008

Mahalanobis Distance: The Mahalanobis distance (MD) is a generalization of the Euclidean distance that accounts for correlations among the X properties. It is calculated as the distance to the center of the training data. The larger the MD, the less trustworthy the prediction.

Mahalanobis Distance p-value: The p-value gives the fraction of training data with an MD greater than or equal to the one for the given sample, assuming normally distributed data. The smaller the p-value, the less trustworthy the prediction. For highly non-normal X properties (e.g., fingerprints), the MD p-value is wildly inaccurate.

### Structural Similar Compounds

| Name                        | SALICYLAZOSULFAPYRIDINE | FUROSEMIDE     | QUERCETIN      |
|-----------------------------|-------------------------|----------------|----------------|
| Structure                   |                         |                |                |
| Actual Endpoint (-log C)    | 3.375                   | 4.04236        | 2.2016         |
| Predicted Endpoint (-log C) | 2.80292                 | 2.8614         | 2.27782        |
| Distance                    | 0.613                   | 0.720          | 0.798          |
| Reference                   | NCI/NTP TR-457          | NCI/NTP TR-356 | NCI/NTP TR-409 |

### Model Applicability

Unknown features are fingerprint features in the query molecule, but not found in the training set.

1. All properties and OPS components are within expected ranges.
2. Unknown FCFP\_2 feature: -885461129: [\*]NNC(=[\*])[\*]

### Feature Contribution

#### Top features for positive contribution

| Fingerprint | Bit/Smiles | Feature Structure | Score |
|-------------|------------|-------------------|-------|
| FCFP_2      | 3          | <p>[*]N[*]</p>    | 0.074 |

|                                               |                   |                                                                                                                                      |              |
|-----------------------------------------------|-------------------|--------------------------------------------------------------------------------------------------------------------------------------|--------------|
| FCFP_2                                        | 332760439         | 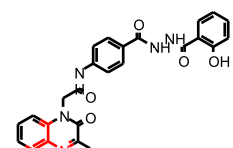<br><chem>[*][c](:[*]):[c](:[cH]:[*])N=[*]</chem> | 0.061        |
| FCFP_2                                        | 565998553         | <br><chem>[*]N([*])C(=O)C(=[*])[*]</chem>         | 0.008        |
| <b>Top Features for negative contribution</b> |                   |                                                                                                                                      |              |
| <b>Fingerprint</b>                            | <b>Bit/Smiles</b> | <b>Feature Structure</b>                                                                                                             | <b>Score</b> |
| FCFP_2                                        | 7                 | <br><chem>[*]O</chem>                             | -0.214       |
| FCFP_2                                        | -549108873        | <br><chem>[*]:[c](:[*])O</chem>                 | -0.127       |
| FCFP_2                                        | 1872154524        | <br><chem>[*]C(=O)[*]</chem>                    | -0.105       |



# Sorafenib

# TOPKAT\_Rat\_Maximum\_Tolerated\_Dose\_Feed

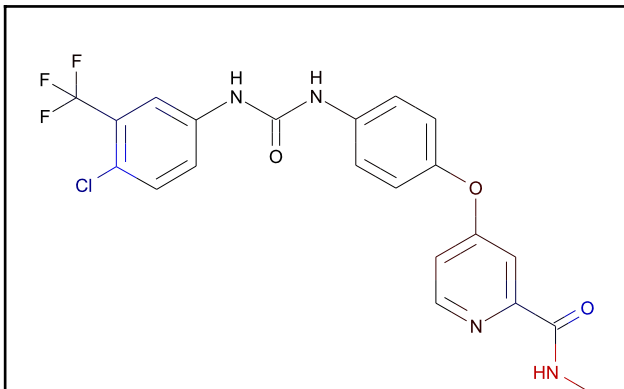

$C_{21}H_{16}ClF_3N_4O_3$   
 Molecular Weight: 464.82494  
 ALogP: 4.175  
 Rotatable Bonds: 6  
 Acceptors: 4  
 Donors: 3

## Model Prediction

Prediction: 0.089  
 Unit: g/kg\_body\_weight  
 Mahalanobis Distance: 12.441  
 Mahalanobis Distance p-value: 1.76e-009

Mahalanobis Distance: The Mahalanobis distance (MD) is a generalization of the Euclidean distance that accounts for correlations among the X properties. It is calculated as the distance to the center of the training data. The larger the MD, the less trustworthy the prediction.  
 Mahalanobis Distance p-value: The p-value gives the fraction of training data with an MD greater than or equal to the one for the given sample, assuming normally distributed data. The smaller the p-value, the less trustworthy the prediction. For highly non-normal X properties (e.g., fingerprints), the MD p-value is wildly inaccurate.

## Structural Similar Compounds

| Name                        | FUROSEMIDE     | PHENOLPHTHALEIN | DISPERSE YELLOW 3 |
|-----------------------------|----------------|-----------------|-------------------|
| Structure                   |                |                 |                   |
| Actual Endpoint (-log C)    | 4.04236        | 2.20184         | 2.77703           |
| Predicted Endpoint (-log C) | 2.8614         | 2.8857          | 2.80195           |
| Distance                    | 0.741          | 0.780           | 0.799             |
| Reference                   | NCI/NTP TR-356 | NCI/NTP TR-465  | NCI/NTP TR-222    |

## Model Applicability

Unknown features are fingerprint features in the query molecule, but not found in the training set.

- All properties and OPS components are within expected ranges.

## Feature Contribution

### Top features for positive contribution

| Fingerprint | Bit/Smiles | Feature Structure                | Score |
|-------------|------------|----------------------------------|-------|
| FCFP_2      | -885550502 | <br><chem>[*]CNC(=[*])[*]</chem> | 0.115 |



|                                               |                   |                                                                                                                                          |              |
|-----------------------------------------------|-------------------|------------------------------------------------------------------------------------------------------------------------------------------|--------------|
| FCFP_2                                        | 3                 | 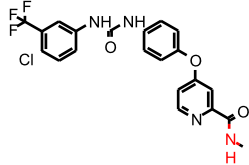<br><chem>[*]N[*]</chem>                              | 0.074        |
| FCFP_2                                        | 332760439         | <br><chem>[*][c](:[*]):[c](:[cH] ):[*])N=[*]</chem>   | 0.061        |
| <b>Top Features for negative contribution</b> |                   |                                                                                                                                          |              |
| <b>Fingerprint</b>                            | <b>Bit/Smiles</b> | <b>Feature Structure</b>                                                                                                                 | <b>Score</b> |
| FCFP_2                                        | 71476542          | <br><chem>[*]:[c](:[*])Cl</chem>                      | -0.134       |
| FCFP_2                                        | 1872154524        | <br><chem>[*]C(=O)[*]</chem>                        | -0.105       |
| FCFP_2                                        | 203677720         | <br><chem>[*]C(=[*])[c](:[cH]:[ *]):[cH]:[*]</chem> | -0.083       |



15a

TOPKAT\_Rat\_Maximum\_Tolerated\_Dose\_Gavage

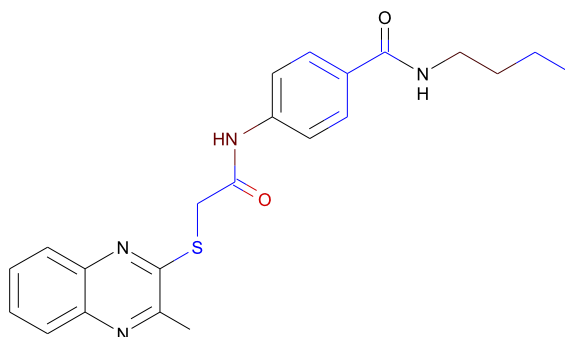C<sub>22</sub>H<sub>24</sub>N<sub>4</sub>O<sub>2</sub>S

Molecular Weight: 408.51656

ALogP: 3.83

Rotatable Bonds: 8

Acceptors: 5

Donors: 2

### Model Prediction

Prediction: 0.250

Unit: g/kg\_body\_weight

Mahalanobis Distance: 10.534

Mahalanobis Distance p-value: 1.04e-006

Mahalanobis Distance: The Mahalanobis distance (MD) is a generalization of the Euclidean distance that accounts for correlations among the X properties. It is calculated as the distance to the center of the training data. The larger the MD, the less trustworthy the prediction.

Mahalanobis Distance p-value: The p-value gives the fraction of training data with an MD greater than or equal to the one for the given sample, assuming normally distributed data. The smaller the p-value, the less trustworthy the prediction. For highly non-normal X properties (e.g., fingerprints), the MD p-value is wildly inaccurate.

### Structural Similar Compounds

| Name                        | OCHRATOXIN     | SULFISOOXAZOLE | PENICILLIN VK  |
|-----------------------------|----------------|----------------|----------------|
| Structure                   |                |                |                |
| Actual Endpoint (-log C)    | 6.28396        | 2.82494        | 2.54455        |
| Predicted Endpoint (-log C) | 5.12358        | 3.0705         | 3.9702         |
| Distance                    | 0.778          | 0.888          | 0.997          |
| Reference                   | NCI/NTP TR-358 | NCI/NTP TR-138 | NCI/NTP TR-336 |

### Model Applicability

Unknown features are fingerprint features in the query molecule, but not found in the training set.

1. Num\_AromaticRings out of range. Value: 3. Training min, max, mean, SD: 0, 2, 0.5625, 0.693.
2. Unknown FCFP\_2 feature: -1410049896: [\*]S[c](:n:[\*]):[c]([\*]):[\*]

### Feature Contribution

#### Top features for positive contribution

| Fingerprint | Bit/Smiles | Feature Structure | Score |
|-------------|------------|-------------------|-------|
| FCFP_2      | 1          | <br>[*]=O         | 0.511 |

|                                               |                   |                                                                                                                                |              |
|-----------------------------------------------|-------------------|--------------------------------------------------------------------------------------------------------------------------------|--------------|
| FCFP_2                                        | 3                 | 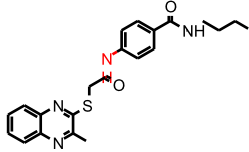<br>[*]N[*]                                 | 0.104        |
| FCFP_2                                        | -1272798659       | <br>[*]CCC[*]                               | 0.070        |
| <b>Top Features for negative contribution</b> |                   |                                                                                                                                |              |
| <b>Fingerprint</b>                            | <b>Bit/Smiles</b> | <b>Feature Structure</b>                                                                                                       | <b>Score</b> |
| FCFP_2                                        | 136597326         | <br>[*]CC                                   | -0.489       |
| FCFP_2                                        | 203677720         | <br>[*]C(=[*])[c](:[cH]:[<br>*]):[cH]:[*] | -0.406       |
| FCFP_2                                        | 1872154524        | <br>[*]C(=O)[*]                           | -0.307       |



15b

TOPKAT\_Rat\_Maximum\_Tolerated\_Dose\_Gavage

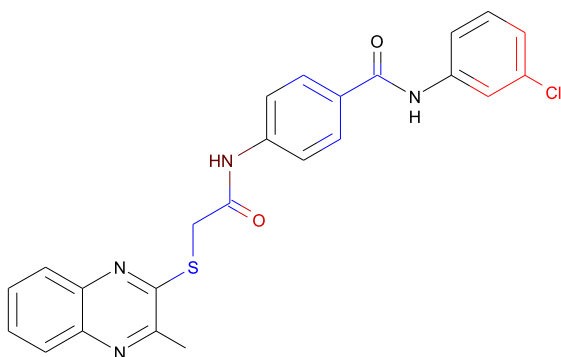C<sub>24</sub>H<sub>19</sub>ClN<sub>4</sub>O<sub>2</sub>S

Molecular Weight: 462.95126

ALogP: 4.743

Rotatable Bonds: 6

Acceptors: 5

Donors: 2

**Model Prediction**

Prediction: 0.003

Unit: g/kg\_body\_weight

Mahalanobis Distance: 10.761

Mahalanobis Distance p-value: 5.01e-007

Mahalanobis Distance: The Mahalanobis distance (MD) is a generalization of the Euclidean distance that accounts for correlations among the X properties. It is calculated as the distance to the center of the training data. The larger the MD, the less trustworthy the prediction.

Mahalanobis Distance p-value: The p-value gives the fraction of training data with an MD greater than or equal to the one for the given sample, assuming normally distributed data. The smaller the p-value, the less trustworthy the prediction. For highly non-normal X properties (e.g., fingerprints), the MD p-value is wildly inaccurate.

**Structural Similar Compounds**

| Name                        | OCHRATOXIN     | SULFISOOXAZOLE | PENICILLIN VK  |
|-----------------------------|----------------|----------------|----------------|
| Structure                   |                |                |                |
| Actual Endpoint (-log C)    | 6.28396        | 2.82494        | 2.54455        |
| Predicted Endpoint (-log C) | 5.12358        | 3.0705         | 3.9702         |
| Distance                    | 0.951          | 1.080          | 1.290          |
| Reference                   | NCI/NTP TR-358 | NCI/NTP TR-138 | NCI/NTP TR-336 |

**Model Applicability**

Unknown features are fingerprint features in the query molecule, but not found in the training set.

1. Molecular\_Weight out of range. Value: 462.95. Training min, max, mean, SD: 68.074, 434.63, 171.13, 85.06.
2. Num\_AromaticRings out of range. Value: 4. Training min, max, mean, SD: 0, 2, 0.5625, 0.693.
3. OPS\_PC5 out of range. Value: -3.5338. Training min, max, SD, explained variance: -3.4, 4.1587, 1.489, 0.0686.
4. OPS\_PC7 out of range. Value: -2.8709. Training min, max, SD, explained variance: -2.8003, 2.9332, 1.16, 0.0416.
5. Unknown FCFP\_2 feature: -1410049896: [\*]S[c](:n:[\*]):[c]([\*]):[\*]

**Feature Contribution****Top features for positive contribution**

| Fingerprint | Bit/Smiles | Feature Structure | Score |
|-------------|------------|-------------------|-------|
| FCFP_2      | 32         | <br>[*]Cl         | 0.526 |

|                                               |                   |                                                                                                                              |              |
|-----------------------------------------------|-------------------|------------------------------------------------------------------------------------------------------------------------------|--------------|
| FCFP_2                                        | 1                 | 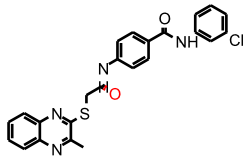<br>[*]=O                                 | 0.511        |
| FCFP_2                                        | 367998008         | <br>[*]:[cH]:[c](Cl):[cH]<br>:[*]         | 0.413        |
| <b>Top Features for negative contribution</b> |                   |                                                                                                                              |              |
| <b>Fingerprint</b>                            | <b>Bit/Smiles</b> | <b>Feature Structure</b>                                                                                                     | <b>Score</b> |
| FCFP_2                                        | 203677720         | <br>[*]C(=[*])[c](:[cH]:[*])<br>:[cH]:[*] | -0.406       |
| FCFP_2                                        | 1872154524        | <br>[*]C(=O)[*]                         | -0.307       |
| FCFP_2                                        | 0                 | <br>[*]C[*]                             | -0.290       |





15c

TOPKAT\_Rat\_Maximum\_Tolerated\_Dose\_Gavage

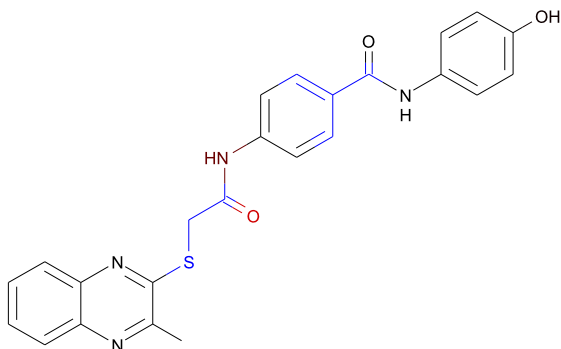C<sub>24</sub>H<sub>20</sub>N<sub>4</sub>O<sub>3</sub>S

Molecular Weight: 444.5056

ALogP: 3.836

Rotatable Bonds: 6

Acceptors: 6

Donors: 3

### Model Prediction

Prediction: 0.014

Unit: g/kg\_body\_weight

Mahalanobis Distance: 12.626

Mahalanobis Distance p-value: 1.14e-009

Mahalanobis Distance: The Mahalanobis distance (MD) is a generalization of the Euclidean distance that accounts for correlations among the X properties. It is calculated as the distance to the center of the training data. The larger the MD, the less trustworthy the prediction.

Mahalanobis Distance p-value: The p-value gives the fraction of training data with an MD greater than or equal to the one for the given sample, assuming normally distributed data. The smaller the p-value, the less trustworthy the prediction. For highly non-normal X properties (e.g., fingerprints), the MD p-value is wildly inaccurate.

### Structural Similar Compounds

| Name                        | OCHRATOXIN     | SULFISOOXAZOLE | PENICILLIN VK  |
|-----------------------------|----------------|----------------|----------------|
| Structure                   |                |                |                |
| Actual Endpoint (-log C)    | 6.28396        | 2.82494        | 2.54455        |
| Predicted Endpoint (-log C) | 5.12358        | 3.0705         | 3.9702         |
| Distance                    | 0.873          | 1.073          | 1.239          |
| Reference                   | NCI/NTP TR-358 | NCI/NTP TR-138 | NCI/NTP TR-336 |

### Model Applicability

Unknown features are fingerprint features in the query molecule, but not found in the training set.

1. Molecular\_Weight out of range. Value: 444.51. Training min, max, mean, SD: 68.074, 434.63, 171.13, 85.06.
2. Num\_AromaticRings out of range. Value: 4. Training min, max, mean, SD: 0, 2, 0.5625, 0.693.
3. OPS\_PC1 out of range. Value: 8.7573. Training min, max, SD, explained variance: -4.0008, 7.9165, 2.861, 0.2531.
4. Unknown FCFP\_2 feature: -1410049896: [\*]S[c](:n:[\*]):[c]([\*]):[\*]

### Feature Contribution

#### Top features for positive contribution

| Fingerprint | Bit/Smiles | Feature Structure | Score |
|-------------|------------|-------------------|-------|
| FCFP_2      | 1          | <br>[*]=O         | 0.511 |

|                                               |                   |                                                                                                                              |              |
|-----------------------------------------------|-------------------|------------------------------------------------------------------------------------------------------------------------------|--------------|
| FCFP_2                                        | 3                 | 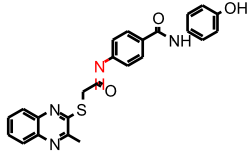<br>[*]N[*]                               | 0.104        |
| FCFP_2                                        | 7                 | <br>[*]O                                  | 0.014        |
| <b>Top Features for negative contribution</b> |                   |                                                                                                                              |              |
| <b>Fingerprint</b>                            | <b>Bit/Smiles</b> | <b>Feature Structure</b>                                                                                                     | <b>Score</b> |
| FCFP_2                                        | 203677720         | <br>[*]C(=[*])[c](:[cH]:[<br>*]):[cH]:[*] | -0.406       |
| FCFP_2                                        | 1872154524        | <br>[*]C(=O)[*]                         | -0.307       |
| FCFP_2                                        | 0                 | <br>[*]C[*]                             | -0.290       |



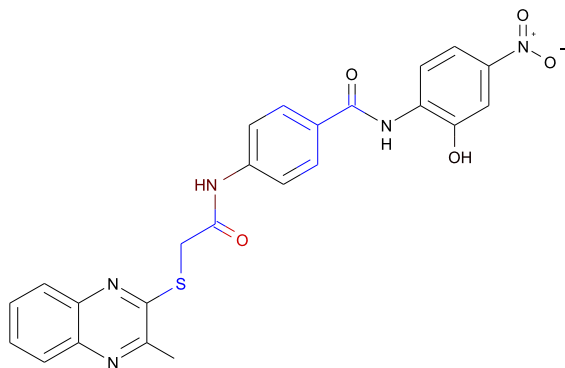

$C_{24}H_{19}N_5O_5S$

Molecular Weight: 489.50316

ALogP: 3.731

Rotatable Bonds: 7

Acceptors: 8

Donors: 3

### Model Prediction

Prediction: 0.004

Unit: g/kg\_body\_weight

Mahalanobis Distance: 12.287

Mahalanobis Distance p-value: 3.45e-009

Mahalanobis Distance: The Mahalanobis distance (MD) is a generalization of the Euclidean distance that accounts for correlations among the X properties. It is calculated as the distance to the center of the training data. The larger the MD, the less trustworthy the prediction.

Mahalanobis Distance p-value: The p-value gives the fraction of training data with an MD greater than or equal to the one for the given sample, assuming normally distributed data. The smaller the p-value, the less trustworthy the prediction. For highly non-normal X properties (e.g., fingerprints), the MD p-value is wildly inaccurate.

### Structural Similar Compounds

| Name                        | OCHRATOXIN     | SULFISOOXAZOLE | PENICILLIN VK  |
|-----------------------------|----------------|----------------|----------------|
| Structure                   |                |                |                |
| Actual Endpoint (-log C)    | 6.28396        | 2.82494        | 2.54455        |
| Predicted Endpoint (-log C) | 5.12358        | 3.0705         | 3.9702         |
| Distance                    | 1.098          | 1.356          | 1.399          |
| Reference                   | NCI/NTP TR-358 | NCI/NTP TR-138 | NCI/NTP TR-336 |

### Model Applicability

Unknown features are fingerprint features in the query molecule, but not found in the training set.

1. Molecular\_Weight out of range. Value: 489.5. Training min, max, mean, SD: 68.074, 434.63, 171.13, 85.06.
2. Num\_H\_Acceptors out of range. Value: 8. Training min, max, mean, SD: 0, 6, 1.6146, 1.644.
3. Num\_AromaticRings out of range. Value: 4. Training min, max, mean, SD: 0, 2, 0.5625, 0.693.
4. Molecular\_PolarSASA out of range. Value: 265.99. Training min, max, mean, SD: 0, 223.97, 50.816, 55.15.
5. Molecular\_PolarSurfaceArea out of range. Value: 175.33. Training min, max, mean, SD: 0, 138.03, 28.978, 32.1.
6. OPS PC1 out of range. Value: 10.108. Training min, max, SD, explained variance: -4.0008, 7.9165, 2.861, 0.2531.
7. Unknown FCFP\_2 feature: 8: [\*][N+](=[\*])[\*]
8. Unknown FCFP\_2 feature: 5: [\*][O-]
9. Unknown FCFP\_2 feature: -1410049896: [\*]S[c](:n:[\*]):[c]([\*]):[\*]
10. Unknown FCFP\_2 feature: -828984032: [\*][N+](=[\*])[c](:c:[\*]):c:[\*]
11. Unknown FCFP\_2 feature: -1338588315: [\*]:[c](:[\*])[N+](=O)[O-]
12. Unknown FCFP\_2 feature: 1872392852: [\*][N+](=O)[\*]
13. Unknown FCFP\_2 feature: 260476081: [\*][N+](=[\*])[O-]

### Feature Contribution

Top features for positive contribution

| Fingerprint                                   | Bit/Smiles | Feature Structure                                                                                                          | Score  |
|-----------------------------------------------|------------|----------------------------------------------------------------------------------------------------------------------------|--------|
| FCFP_2                                        | 1          | 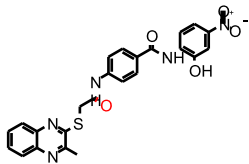<br>[*]=O                               | 0.511  |
| FCFP_2                                        | 3          | <br>[*]N[*]                             | 0.104  |
| FCFP_2                                        | 7          | <br>[*]O                                | 0.014  |
| <b>Top Features for negative contribution</b> |            |                                                                                                                            |        |
| Fingerprint                                   | Bit/Smiles | Feature Structure                                                                                                          | Score  |
| FCFP_2                                        | 203677720  | <br>[*]C(=[*])[c](-[cH]:[*]):[cH]:[*] | -0.406 |

|        |            |                                                                                                                                      |        |
|--------|------------|--------------------------------------------------------------------------------------------------------------------------------------|--------|
| FCFP_2 | 1872154524 | 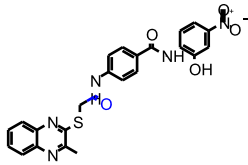 <p data-bbox="1423 305 1543 337">[*]C(=O)[*]</p> | -0.307 |
| FCFP_2 | 0          |  <p data-bbox="1459 576 1528 609">[*]C[*]</p>     | -0.290 |

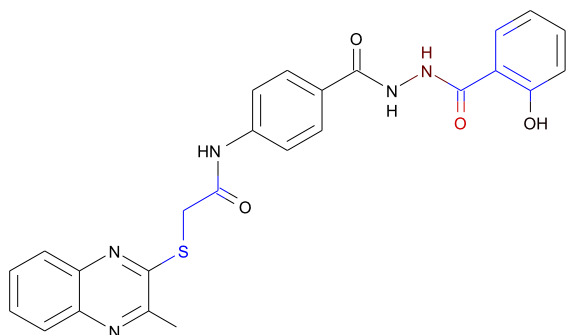

$C_{25}H_{21}N_5O_4S$

Molecular Weight: 487.53034

ALogP: 3.093

Rotatable Bonds: 7

Acceptors: 7

Donors: 4

### Model Prediction

Prediction: 0.012

Unit: g/kg\_body\_weight

Mahalanobis Distance: 12.599

Mahalanobis Distance p-value: 1.24e-009

Mahalanobis Distance: The Mahalanobis distance (MD) is a generalization of the Euclidean distance that accounts for correlations among the X properties. It is calculated as the distance to the center of the training data. The larger the MD, the less trustworthy the prediction.

Mahalanobis Distance p-value: The p-value gives the fraction of training data with an MD greater than or equal to the one for the given sample, assuming normally distributed data. The smaller the p-value, the less trustworthy the prediction. For highly non-normal X properties (e.g., fingerprints), the MD p-value is wildly inaccurate.

### Structural Similar Compounds

| Name                        | OCHRATOXIN     | SULFISOOXAZOLE | PENICILLIN VK  |
|-----------------------------|----------------|----------------|----------------|
| Structure                   |                |                |                |
| Actual Endpoint (-log C)    | 6.28396        | 2.82494        | 2.54455        |
| Predicted Endpoint (-log C) | 5.12358        | 3.0705         | 3.9702         |
| Distance                    | 1.016          | 1.276          | 1.366          |
| Reference                   | NCI/NTP TR-358 | NCI/NTP TR-138 | NCI/NTP TR-336 |

### Model Applicability

Unknown features are fingerprint features in the query molecule, but not found in the training set.

1. Molecular\_Weight out of range. Value: 487.53. Training min, max, mean, SD: 68.074, 434.63, 171.13, 85.06.
2. Num\_H\_Donors out of range. Value: 4. Training min, max, mean, SD: 0, 3, 0.4375, 0.8311.
3. Num\_H\_Acceptors out of range. Value: 7. Training min, max, mean, SD: 0, 6, 1.6146, 1.644.
4. Num\_AromaticRings out of range. Value: 4. Training min, max, mean, SD: 0, 2, 0.5625, 0.693.
5. Molecular\_PolarSASA out of range. Value: 234.94. Training min, max, mean, SD: 0, 223.97, 50.816, 55.15.
6. Molecular\_PolarSurfaceArea out of range. Value: 158.61. Training min, max, mean, SD: 0, 138.03, 28.978, 32.1.
7. OPS\_PC1 out of range. Value: 9.9011. Training min, max, SD, explained variance: -4.0008, 7.9165, 2.861, 0.2531.
8. Unknown FCFP\_2 feature: -885461129: [\*]NNC(=[\*])[\*]
9. Unknown FCFP\_2 feature: -1410049896: [\*]S[c](:n:[\*]):[c]([\*]):[\*]

### Feature Contribution

#### Top features for positive contribution

| Fingerprint | Bit/Smiles | Feature Structure | Score |
|-------------|------------|-------------------|-------|
|             |            |                   |       |

| FCFP_2                                 | 1          | 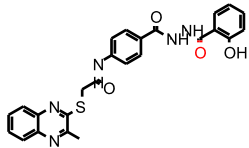<br>[*]=O                                   | 0.511  |
|----------------------------------------|------------|--------------------------------------------------------------------------------------------------------------------------------|--------|
| FCFP_2                                 | 3          | <br>[*]N[*]                                 | 0.104  |
| FCFP_2                                 | 7          | <br>[*]O                                    | 0.014  |
| Top Features for negative contribution |            |                                                                                                                                |        |
| Fingerprint                            | Bit/Smiles | Feature Structure                                                                                                              | Score  |
| FCFP_2                                 | 203677720  | <br>[*]C(=[*])[c](:[cH]:[<br>*]):[cH]:[*] | -0.406 |
| FCFP_2                                 | 1872154524 | <br>[*]C(=O)[*]                           | -0.307 |



|        |   |                                                                                                |        |
|--------|---|------------------------------------------------------------------------------------------------|--------|
| FCFP_2 | 0 | 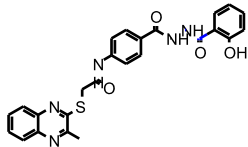<br>[*]C[*] | -0.290 |
|--------|---|------------------------------------------------------------------------------------------------|--------|

17a

TOPKAT\_Rat\_Maximum\_Tolerated\_Dose\_Gavage

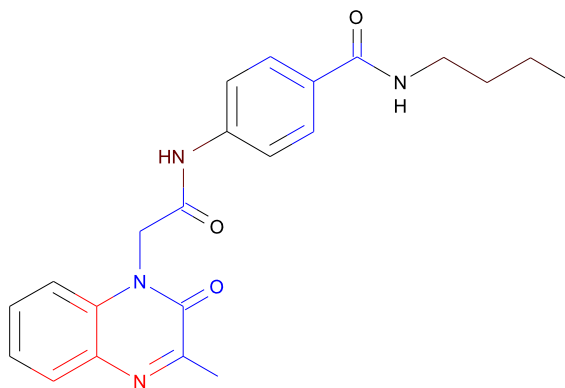C<sub>22</sub>H<sub>24</sub>N<sub>4</sub>O<sub>3</sub>

Molecular Weight: 392.45096

ALogP: 2.212

Rotatable Bonds: 7

Acceptors: 4

Donors: 2

**Model Prediction**

Prediction: 0.611

Unit: g/kg\_body\_weight

Mahalanobis Distance: 9.374

Mahalanobis Distance p-value: 3.95e-005

Mahalanobis Distance: The Mahalanobis distance (MD) is a generalization of the Euclidean distance that accounts for correlations among the X properties. It is calculated as the distance to the center of the training data. The larger the MD, the less trustworthy the prediction.

Mahalanobis Distance p-value: The p-value gives the fraction of training data with an MD greater than or equal to the one for the given sample, assuming normally distributed data. The smaller the p-value, the less trustworthy the prediction. For highly non-normal X properties (e.g., fingerprints), the MD p-value is wildly inaccurate.

**Structural Similar Compounds**

| Name                        | PENICILLIN VK  | PROBENECID     | OCHRATOXIN     |
|-----------------------------|----------------|----------------|----------------|
| Structure                   |                |                |                |
| Actual Endpoint (-log C)    | 2.54455        | 2.85333        | 6.28396        |
| Predicted Endpoint (-log C) | 3.9702         | 2.4258         | 5.12358        |
| Distance                    | 0.760          | 0.763          | 0.768          |
| Reference                   | NCI/NTP TR-336 | NCI/NTP TR-395 | NCI/NTP TR-358 |

**Model Applicability**

Unknown features are fingerprint features in the query molecule, but not found in the training set.

- OPS PC6 out of range. Value: -2.8056. Training min, max, SD, explained variance: -2.4321, 2.9885, 1.256, 0.0488.
- Unknown FCFP\_2 feature: 580453787: [\*]C(=N[c](:[\*]):[\*])[\*]

**Feature Contribution****Top features for positive contribution**

| Fingerprint | Bit/Smiles | Feature Structure                         | Score |
|-------------|------------|-------------------------------------------|-------|
| FCFP_2      | 332760439  | <br>[*][c](:[*]):[c](:[cH]<br>]:[*])N=[*] | 0.672 |

| FCFP_2                                 | 1          | 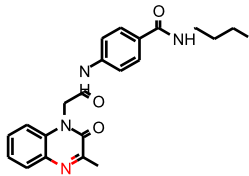<br>[*]=O                                   | 0.511  |
|----------------------------------------|------------|--------------------------------------------------------------------------------------------------------------------------------|--------|
| FCFP_2                                 | 3          | <br>[*]N[*]                                 | 0.104  |
| Top Features for negative contribution |            |                                                                                                                                |        |
| Fingerprint                            | Bit/Smiles | Feature Structure                                                                                                              | Score  |
| FCFP_2                                 | 136597326  | <br>[*]CC                                   | -0.489 |
| FCFP_2                                 | 203677720  | <br>[*]C(=[*])[c](:[cH]:[<br>*]):[cH]:[*] | -0.406 |
| FCFP_2                                 | 565998553  | <br>[*]N([*])C(=O)C(=[*])<br>[*]          | -0.348 |



17b

TOPKAT\_Rat\_Maximum\_Tolerated\_Dose\_Gavage

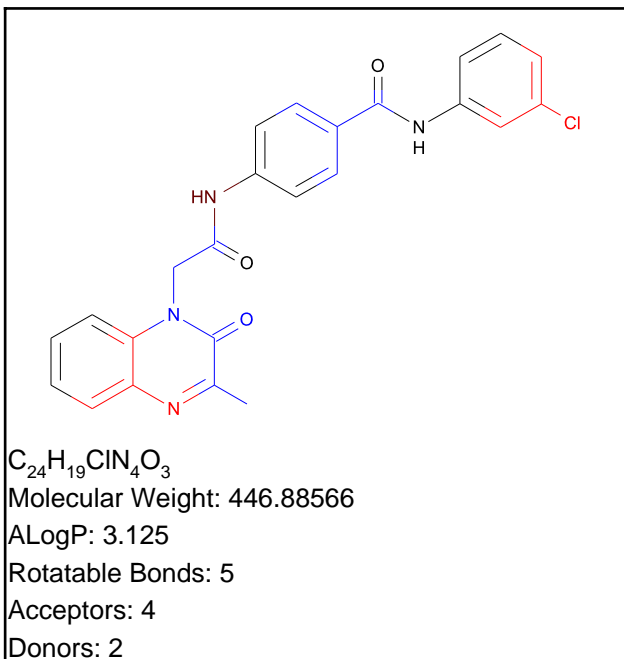

### Model Prediction

Prediction: 0.022

Unit: g/kg\_body\_weight

Mahalanobis Distance: 9.375

Mahalanobis Distance p-value: 3.94e-005

Mahalanobis Distance: The Mahalanobis distance (MD) is a generalization of the Euclidean distance that accounts for correlations among the X properties. It is calculated as the distance to the center of the training data. The larger the MD, the less trustworthy the prediction.

Mahalanobis Distance p-value: The p-value gives the fraction of training data with an MD greater than or equal to the one for the given sample, assuming normally distributed data. The smaller the p-value, the less trustworthy the prediction. For highly non-normal X properties (e.g., fingerprints), the MD p-value is wildly inaccurate.

### Structural Similar Compounds

| Name                        | OCHRATOXIN                                                                          | SULFISOOXAZOLE                                                                      | PENICILLIN VK                                                                       |
|-----------------------------|-------------------------------------------------------------------------------------|-------------------------------------------------------------------------------------|-------------------------------------------------------------------------------------|
| Structure                   | 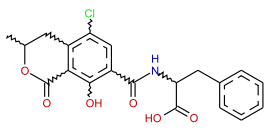 |  |  |
| Actual Endpoint (-log C)    | 6.28396                                                                             | 2.82494                                                                             | 2.54455                                                                             |
| Predicted Endpoint (-log C) | 5.12358                                                                             | 3.0705                                                                              | 3.9702                                                                              |
| Distance                    | 0.777                                                                               | 0.899                                                                               | 1.005                                                                               |
| Reference                   | NCI/NTP TR-358                                                                      | NCI/NTP TR-138                                                                      | NCI/NTP TR-336                                                                      |

### Model Applicability

Unknown features are fingerprint features in the query molecule, but not found in the training set.

1. Molecular\_Weight out of range. Value: 446.89. Training min, max, mean, SD: 68.074, 434.63, 171.13, 85.06.
2. Num\_AromaticRings out of range. Value: 3. Training min, max, mean, SD: 0, 2, 0.5625, 0.693.
3. OPS\_PC10 out of range. Value: 3.2414. Training min, max, SD, explained variance: -3.9696, 2.3971, 0.982, 0.0298.
4. Unknown FCFP\_2 feature: 580453787: [\*]C(=N[c](:[\*]):[\*])[\*]

### Feature Contribution

#### Top features for positive contribution

| Fingerprint | Bit/Smiles | Feature Structure                                                                                                                      | Score |
|-------------|------------|----------------------------------------------------------------------------------------------------------------------------------------|-------|
| FCFP_2      | 332760439  | 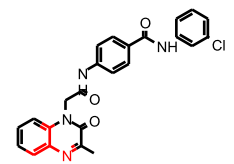<br><chem>[*][c](:[*]):[c](:[cH]:[*])N=[*]</chem> | 0.672 |

|                                               |                   |                                                                                                                                |              |
|-----------------------------------------------|-------------------|--------------------------------------------------------------------------------------------------------------------------------|--------------|
| FCFP_2                                        | 32                | 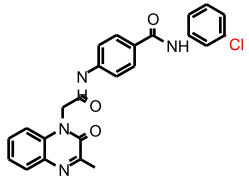<br>[*]Cl                                   | 0.526        |
| FCFP_2                                        | 1                 | <br>[*]=O                                   | 0.511        |
| <b>Top Features for negative contribution</b> |                   |                                                                                                                                |              |
| <b>Fingerprint</b>                            | <b>Bit/Smiles</b> | <b>Feature Structure</b>                                                                                                       | <b>Score</b> |
| FCFP_2                                        | 136597326         | <br>[*]CC                                   | -0.489       |
| FCFP_2                                        | 203677720         | <br>[*]C(=[*])[c](:[cH]:[<br>*]):[cH]:[*] | -0.406       |
| FCFP_2                                        | 565998553         | <br>[*]N([*])C(=O)C(=[*])<br>[*]          | -0.348       |



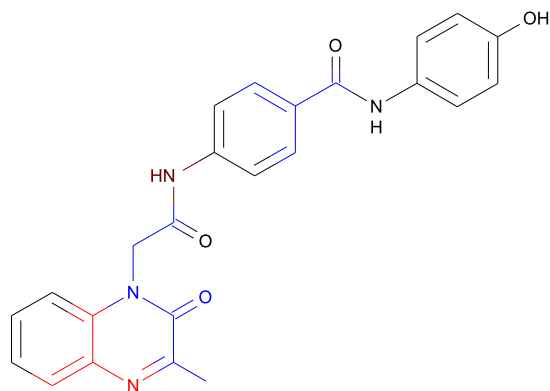
 $C_{24}H_{20}N_4O_4$ 

Molecular Weight: 428.44

ALogP: 2.218

Rotatable Bonds: 5

Acceptors: 5

Donors: 3

### Model Prediction

Prediction: 0.104

Unit: g/kg\_body\_weight

Mahalanobis Distance: 9.317

Mahalanobis Distance p-value: 4.69e-005

Mahalanobis Distance: The Mahalanobis distance (MD) is a generalization of the Euclidean distance that accounts for correlations among the X properties. It is calculated as the distance to the center of the training data. The larger the MD, the less trustworthy the prediction.

Mahalanobis Distance p-value: The p-value gives the fraction of training data with an MD greater than or equal to the one for the given sample, assuming normally distributed data. The smaller the p-value, the less trustworthy the prediction. For highly non-normal X properties (e.g., fingerprints), the MD p-value is wildly inaccurate.

### Structural Similar Compounds

| Name                        | OCHRATOXIN     | SULFISOOXAZOLE | PENICILLIN VK  |
|-----------------------------|----------------|----------------|----------------|
| Structure                   |                |                |                |
| Actual Endpoint (-log C)    | 6.28396        | 2.82494        | 2.54455        |
| Predicted Endpoint (-log C) | 5.12358        | 3.0705         | 3.9702         |
| Distance                    | 0.627          | 0.864          | 0.916          |
| Reference                   | NCI/NTP TR-358 | NCI/NTP TR-138 | NCI/NTP TR-336 |

### Model Applicability

Unknown features are fingerprint features in the query molecule, but not found in the training set.

1. Num\_AromaticRings out of range. Value: 3. Training min, max, mean, SD: 0, 2, 0.5625, 0.693.
2. OPS PC1 out of range. Value: 8.6203. Training min, max, SD, explained variance: -4.0008, 7.9165, 2.861, 0.2531.
3. OPS PC10 out of range. Value: 2.4631. Training min, max, SD, explained variance: -3.9696, 2.3971, 0.982, 0.0298.
4. Unknown FCFP\_2 feature: 580453787: [\*]C(=N[c](:[\*]):[\*])[\*]

### Feature Contribution

#### Top features for positive contribution

| Fingerprint | Bit/Smiles | Feature Structure                    | Score |
|-------------|------------|--------------------------------------|-------|
| FCFP_2      | 332760439  | <br>[*][c](:[*]):[c](:[cH]:[*])N=[*] | 0.672 |



|                                               |                   |                                                                                                                            |              |
|-----------------------------------------------|-------------------|----------------------------------------------------------------------------------------------------------------------------|--------------|
| FCFP_2                                        | 1                 | 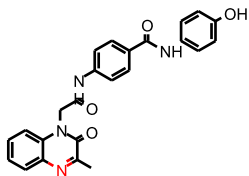<br>[*]=O                               | 0.511        |
| FCFP_2                                        | 3                 | <br>[*]N[*]                             | 0.104        |
| <b>Top Features for negative contribution</b> |                   |                                                                                                                            |              |
| <b>Fingerprint</b>                            | <b>Bit/Smiles</b> | <b>Feature Structure</b>                                                                                                   | <b>Score</b> |
| FCFP_2                                        | 136597326         | <br>[*]CC                               | -0.489       |
| FCFP_2                                        | 203677720         | <br>[*]C(=[*])[c](:[cH]:[*]):[cH]:[*] | -0.406       |
| FCFP_2                                        | 565998553         | <br>[*]N([*])C(=O)C(=[*])<br>[*]      | -0.348       |



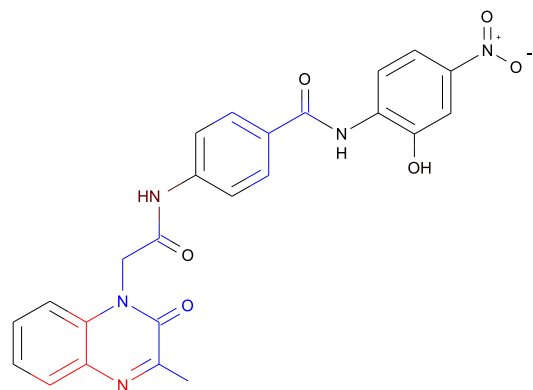
 $C_{24}H_{19}N_5O_6$ 

Molecular Weight: 473.43756

ALogP: 2.113

Rotatable Bonds: 6

Acceptors: 7

Donors: 3

### Model Prediction

Prediction: 0.032

Unit: g/kg\_body\_weight

Mahalanobis Distance: 9.408

Mahalanobis Distance p-value: 3.56e-005

Mahalanobis Distance: The Mahalanobis distance (MD) is a generalization of the Euclidean distance that accounts for correlations among the X properties. It is calculated as the distance to the center of the training data. The larger the MD, the less trustworthy the prediction.

Mahalanobis Distance p-value: The p-value gives the fraction of training data with an MD greater than or equal to the one for the given sample, assuming normally distributed data. The smaller the p-value, the less trustworthy the prediction. For highly non-normal X properties (e.g., fingerprints), the MD p-value is wildly inaccurate.

### Structural Similar Compounds

| Name                        | OCHRATOXIN     | PENICILLIN VK  | SULFISOOXAZOLE |
|-----------------------------|----------------|----------------|----------------|
| Structure                   |                |                |                |
| Actual Endpoint (-log C)    | 6.28396        | 2.54455        | 2.82494        |
| Predicted Endpoint (-log C) | 5.12358        | 3.9702         | 3.0705         |
| Distance                    | 0.795          | 1.036          | 1.122          |
| Reference                   | NCI/NTP TR-358 | NCI/NTP TR-336 | NCI/NTP TR-138 |

### Model Applicability

Unknown features are fingerprint features in the query molecule, but not found in the training set.

1. Molecular\_Weight out of range. Value: 473.44. Training min, max, mean, SD: 68.074, 434.63, 171.13, 85.06.
2. Num\_H\_Acceptors out of range. Value: 7. Training min, max, mean, SD: 0, 6, 1.6146, 1.644.
3. Num\_AromaticRings out of range. Value: 3. Training min, max, mean, SD: 0, 2, 0.5625, 0.693.
4. Molecular\_PolarSASA out of range. Value: 240.14. Training min, max, mean, SD: 0, 223.97, 50.816, 55.15.
5. Molecular\_PolarSurfaceArea out of range. Value: 156.91. Training min, max, mean, SD: 0, 138.03, 28.978, 32.1.
6. OPS PC1 out of range. Value: 9.9705. Training min, max, SD, explained variance: -4.0008, 7.9165, 2.861, 0.2531.
7. Unknown FCFP\_2 feature: 8: [\*][N+](=[\*])[\*]
8. Unknown FCFP\_2 feature: 5: [\*][O-]
9. Unknown FCFP\_2 feature: 580453787: [\*]C(=N[c](:[\*]):[\*])[\*]
10. Unknown FCFP\_2 feature: -828984032: [\*][N+](=[\*])[c](:c:[\*]):c:[\*]
11. Unknown FCFP\_2 feature: -1338588315: [\*]:[c](:[\*])[N+](=O)[O-]
12. Unknown FCFP\_2 feature: 1872392852: [\*][N+](=O)[\*]
13. Unknown FCFP\_2 feature: 260476081: [\*][N+](=[\*])[O-]

### Feature Contribution

Top features for positive contribution

| Fingerprint                                   | Bit/Smiles | Feature Structure                                                                                                           | Score  |
|-----------------------------------------------|------------|-----------------------------------------------------------------------------------------------------------------------------|--------|
| FCFP_2                                        | 332760439  | 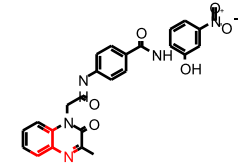<br>[*][c](:[*]):[c](:[cH<br>]:[*])N=[*] | 0.672  |
| FCFP_2                                        | 1          | <br>[*]=O                                | 0.511  |
| FCFP_2                                        | 3          | <br>[*]N[*]                              | 0.104  |
| <b>Top Features for negative contribution</b> |            |                                                                                                                             |        |
| Fingerprint                                   | Bit/Smiles | Feature Structure                                                                                                           | Score  |
| FCFP_2                                        | 136597326  | <br>[*]CC                              | -0.489 |

|        |           |                                                                                                                                                                 |        |
|--------|-----------|-----------------------------------------------------------------------------------------------------------------------------------------------------------------|--------|
| FCFP_2 | 203677720 | 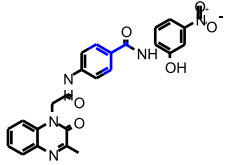 <p data-bbox="1386 284 1554 341">[*]C(=[*])[c](:[cH]:[<br/>*]):[cH]:[*]</p> | -0.406 |
| FCFP_2 | 565998553 |  <p data-bbox="1386 560 1554 617">[*]N[*]C(=O)C(=[*])<br/>[*]</p>            | -0.348 |

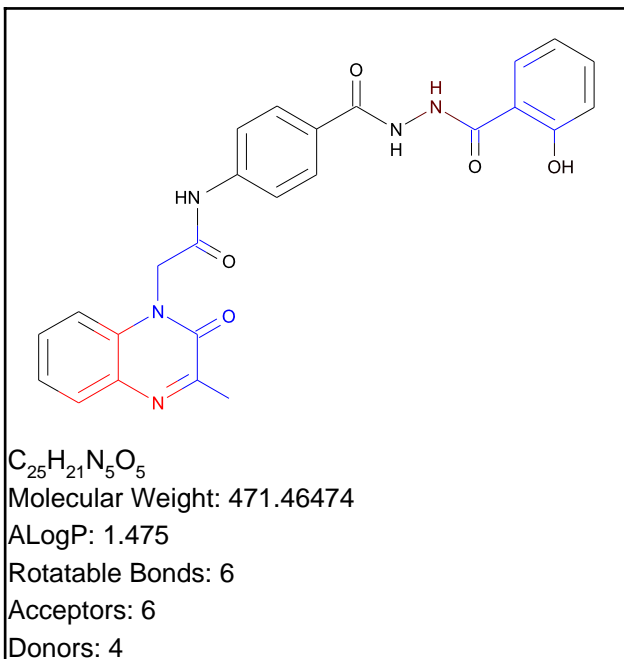

### Model Prediction

Prediction: 0.093

Unit: g/kg\_body\_weight

Mahalanobis Distance: 10.392

Mahalanobis Distance p-value: 1.64e-006

Mahalanobis Distance: The Mahalanobis distance (MD) is a generalization of the Euclidean distance that accounts for correlations among the X properties. It is calculated as the distance to the center of the training data. The larger the MD, the less trustworthy the prediction.

Mahalanobis Distance p-value: The p-value gives the fraction of training data with an MD greater than or equal to the one for the given sample, assuming normally distributed data. The smaller the p-value, the less trustworthy the prediction. For highly non-normal X properties (e.g., fingerprints), the MD p-value is wildly inaccurate.

### Structural Similar Compounds

| Name                        | OCHRATOXIN                                                                          | PENICILLIN VK                                                                       | AMPICILLIN TRIHYDRATE                                                               |
|-----------------------------|-------------------------------------------------------------------------------------|-------------------------------------------------------------------------------------|-------------------------------------------------------------------------------------|
| Structure                   | 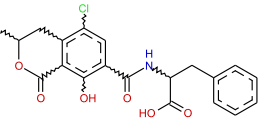 |  |  |
| Actual Endpoint (-log C)    | 6.28396                                                                             | 2.54455                                                                             | 2.36724                                                                             |
| Predicted Endpoint (-log C) | 5.12358                                                                             | 3.9702                                                                              | 2.27651                                                                             |
| Distance                    | 0.767                                                                               | 1.047                                                                               | 1.082                                                                               |
| Reference                   | NCI/NTP TR-358                                                                      | NCI/NTP TR-336                                                                      | NCI/NTP TR-318                                                                      |

### Model Applicability

Unknown features are fingerprint features in the query molecule, but not found in the training set.

1. Molecular\_Weight out of range. Value: 471.46. Training min, max, mean, SD: 68.074, 434.63, 171.13, 85.06.
2. Num\_H\_Donors out of range. Value: 4. Training min, max, mean, SD: 0, 3, 0.4375, 0.8311.
3. Num\_AromaticRings out of range. Value: 3. Training min, max, mean, SD: 0, 2, 0.5625, 0.693.
4. Molecular\_PolarSurfaceArea out of range. Value: 140.19. Training min, max, mean, SD: 0, 138.03, 28.978, 32.1.
5. OPS PC1 out of range. Value: 9.764. Training min, max, SD, explained variance: -4.0008, 7.9165, 2.861, 0.2531.
6. Unknown FCFP\_2 feature: 580453787: [\*]C(=N[c](:[\*]):[\*])[\*]
7. Unknown FCFP\_2 feature: -885461129: [\*]NNC(=[\*])[\*]

### Feature Contribution

#### Top features for positive contribution

| Fingerprint | Bit/Smiles | Feature Structure | Score |
|-------------|------------|-------------------|-------|
|             |            |                   |       |

|                                               |                   |                                                                                                                                |              |
|-----------------------------------------------|-------------------|--------------------------------------------------------------------------------------------------------------------------------|--------------|
| FCFP_2                                        | 332760439         | 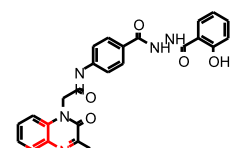<br>[*][c](:[*]):[c](:[cH<br>]:[*])N=[*]    | 0.672        |
| FCFP_2                                        | 1                 | <br>[*]=O                                   | 0.511        |
| FCFP_2                                        | 3                 | <br>[*]N[*]                                 | 0.104        |
| <b>Top Features for negative contribution</b> |                   |                                                                                                                                |              |
| <b>Fingerprint</b>                            | <b>Bit/Smiles</b> | <b>Feature Structure</b>                                                                                                       | <b>Score</b> |
| FCFP_2                                        | 136597326         | <br>[*]CC                                 | -0.489       |
| FCFP_2                                        | 203677720         | <br>[*]C(=[*])[c](:[cH]:[<br>*]):[cH]:[*] | -0.406       |

|        |           |                                                                                                                                                      |        |
|--------|-----------|------------------------------------------------------------------------------------------------------------------------------------------------------|--------|
| FCFP_2 | 565998553 | 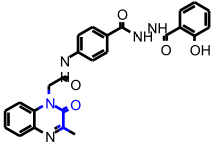 <p data-bbox="1386 289 1516 332">[*]N[*]C(=O)C(=[*])<br/>[*]</p> | -0.348 |
|--------|-----------|------------------------------------------------------------------------------------------------------------------------------------------------------|--------|



# Sorafenib

# TOPKAT\_Rat\_Maximum\_Tolerated\_Dose\_Gavage

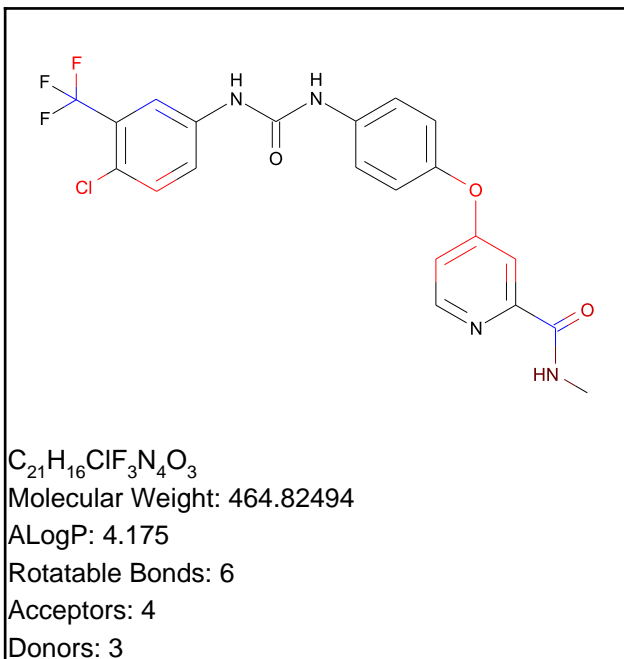

## Model Prediction

Prediction: 0.001

Unit: g/kg\_body\_weight

Mahalanobis Distance: 12.193

Mahalanobis Distance p-value: 4.69e-009

Mahalanobis Distance: The Mahalanobis distance (MD) is a generalization of the Euclidean distance that accounts for correlations among the X properties. It is calculated as the distance to the center of the training data. The larger the MD, the less trustworthy the prediction.

Mahalanobis Distance p-value: The p-value gives the fraction of training data with an MD greater than or equal to the one for the given sample, assuming normally distributed data. The smaller the p-value, the less trustworthy the prediction. For highly non-normal X properties (e.g., fingerprints), the MD p-value is wildly inaccurate.

## Structural Similar Compounds

| Name                        | OCHRATOXIN                                                                          | SULFISOOXAZOLE                                                                      | PENICILLIN VK                                                                       |
|-----------------------------|-------------------------------------------------------------------------------------|-------------------------------------------------------------------------------------|-------------------------------------------------------------------------------------|
| Structure                   | 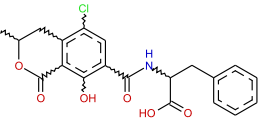 |  |  |
| Actual Endpoint (-log C)    | 6.28396                                                                             | 2.82494                                                                             | 2.54455                                                                             |
| Predicted Endpoint (-log C) | 5.12358                                                                             | 3.0705                                                                              | 3.9702                                                                              |
| Distance                    | 0.758                                                                               | 0.997                                                                               | 1.159                                                                               |
| Reference                   | NCI/NTP TR-358                                                                      | NCI/NTP TR-138                                                                      | NCI/NTP TR-336                                                                      |

## Model Applicability

Unknown features are fingerprint features in the query molecule, but not found in the training set.

1. Molecular\_Weight out of range. Value: 464.82. Training min, max, mean, SD: 68.074, 434.63, 171.13, 85.06.
2. Num\_AromaticRings out of range. Value: 3. Training min, max, mean, SD: 0, 2, 0.5625, 0.693.
3. OPS\_PC5 out of range. Value: -3.5737. Training min, max, SD, explained variance: -3.4, 4.1587, 1.489, 0.0686.
4. OPS\_PC7 out of range. Value: -3.8342. Training min, max, SD, explained variance: -2.8003, 2.9332, 1.16, 0.0416.
5. Unknown FCFP\_2 feature: 1499521844: [\*]NC(=O)N[\*]
6. Unknown FCFP\_2 feature: -1029533685: [\*]:[c](:[\*])C(F)(F)F
7. Unknown FCFP\_2 feature: 136686699: [\*]NC

## Feature Contribution

### Top features for positive contribution

| Fingerprint | Bit/Smiles | Feature Structure | Score |
|-------------|------------|-------------------|-------|
|             |            |                   |       |

|                                               |                   |                                                                                                                                          |              |
|-----------------------------------------------|-------------------|------------------------------------------------------------------------------------------------------------------------------------------|--------------|
| FCFP_2                                        | 332760439         | 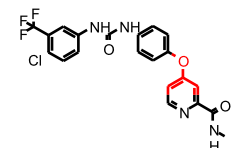<br><chem>[*][c](:[*]):[c](:[cH] ):[*])N=[*]</chem>   | 0.672        |
| FCFP_2                                        | 32                | <br><chem>[*]Cl</chem>                                | 0.526        |
| FCFP_2                                        | 1                 | <br><chem>[*]=O</chem>                                | 0.511        |
| <b>Top Features for negative contribution</b> |                   |                                                                                                                                          |              |
| <b>Fingerprint</b>                            | <b>Bit/Smiles</b> | <b>Feature Structure</b>                                                                                                                 | <b>Score</b> |
| FCFP_2                                        | 203677720         | <br><chem>[*]C(=[*])[c](:[cH]:[ *]):[cH]:[*]</chem> | -0.406       |
| FCFP_2                                        | 1872154524        | <br><chem>[*]C(=O)[*]</chem>                        | -0.307       |

FCFP\_2

0

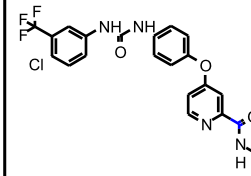

[\*]C[\*]

-0.290

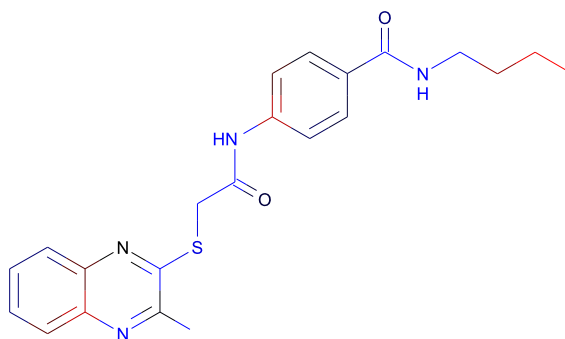
 $C_{22}H_{24}N_4O_2S$ 

Molecular Weight: 408.51656

ALogP: 3.83

Rotatable Bonds: 8

Acceptors: 5

Donors: 2

### Model Prediction

Prediction: 12.496

Unit: g/kg\_body\_weight

Mahalanobis Distance: 21.154

Mahalanobis Distance p-value: 6.56e-013

Mahalanobis Distance: The Mahalanobis distance (MD) is a generalization of the Euclidean distance that accounts for correlations among the X properties. It is calculated as the distance to the center of the training data. The larger the MD, the less trustworthy the prediction.

Mahalanobis Distance p-value: The p-value gives the fraction of training data with an MD greater than or equal to the one for the given sample, assuming normally distributed data. The smaller the p-value, the less trustworthy the prediction. For highly non-normal X properties (e.g., fingerprints), the MD p-value is wildly inaccurate.

### Structural Similar Compounds

| Name                        | ACEMETACIN        | CARBAMIC ACID; [1-[(5-CYANOPENTYL)CARBAMOYL]BENZIMIDAZOL-2-YL]-; METHYL ESTER | bis-OXATIN ACETATE |
|-----------------------------|-------------------|-------------------------------------------------------------------------------|--------------------|
| Structure                   |                   |                                                                               |                    |
| Actual Endpoint (-log C)    | 4.235             | 2.12                                                                          | 1.717              |
| Predicted Endpoint (-log C) | 3.39415           | 1.78415                                                                       | 2.40947            |
| Distance                    | 0.614             | 0.643                                                                         | 0.647              |
| Reference                   | ARZNAD 30;1398;80 | 85ARAE 4;118;76/77                                                            | NIIRDN 6;609;82    |

### Model Applicability

Unknown features are fingerprint features in the query molecule, but not found in the training set.

1. All properties and OPS components are within expected ranges.
2. Unknown FCFP\_6 feature: 16: [\*][c](:[\*]):[\*]
3. Unknown FCFP\_6 feature: 1618154665: [\*][c](:[\*]):[cH]:[cH]:[\*]
4. Unknown FCFP\_6 feature: 1747237384: [\*][c](:[\*]):n:[c](:[\*]):[\*]
5. Unknown FCFP\_6 feature: -1410049896: [\*]S[c](:n:[\*]):[c]([\*]):[\*]

### Feature Contribution

#### Top features for positive contribution

| Fingerprint | Bit/Smiles | Feature Structure    | Score |
|-------------|------------|----------------------|-------|
| ECFP_6      | 642810091  | <br>[*][c](:[*]):[*] | 0.281 |

|                                               |                   |                                                                                                                                                  |              |
|-----------------------------------------------|-------------------|--------------------------------------------------------------------------------------------------------------------------------------------------|--------------|
| ECFP_6                                        | -1897341097       | 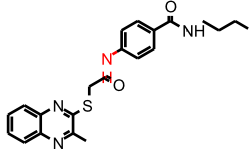<br><chem>[*]N[*]</chem>                                      | 0.216        |
| ECFP_6                                        | 1444581947        | <br><chem>[*]C(=[*])[c]1:[cH]:[*]:[c]([*]):[cH]:[cH]:1</chem> | 0.163        |
| <b>Top Features for negative contribution</b> |                   |                                                                                                                                                  |              |
| <b>Fingerprint</b>                            | <b>Bit/Smiles</b> | <b>Feature Structure</b>                                                                                                                         | <b>Score</b> |
| ECFP_6                                        | 497523368         | <br><chem>[*]CNC(=[*])[*]</chem>                              | -0.301       |
| ECFP_6                                        | 655739385         | <br><chem>[*]:n:[*]</chem>                                  | -0.239       |
| FCFP_6                                        | 566058135         | <br><chem>[*]CC(=O)N[*]</chem>                              | -0.216       |



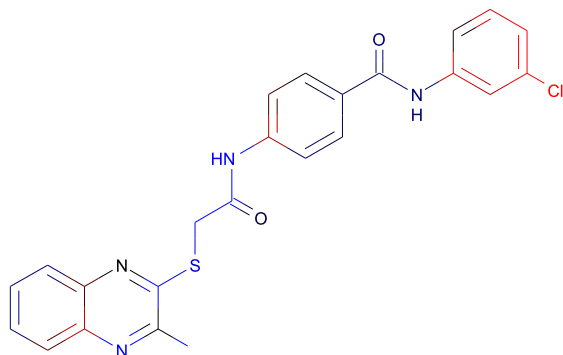

$C_{24}H_{19}ClN_4O_2S$

Molecular Weight: 462.95126

ALogP: 4.743

Rotatable Bonds: 6

Acceptors: 5

Donors: 2

### Model Prediction

Prediction: 4.969

Unit: g/kg\_body\_weight

Mahalanobis Distance: 20.014

Mahalanobis Distance p-value: 5.71e-009

Mahalanobis Distance: The Mahalanobis distance (MD) is a generalization of the Euclidean distance that accounts for correlations among the X properties. It is calculated as the distance to the center of the training data. The larger the MD, the less trustworthy the prediction.

Mahalanobis Distance p-value: The p-value gives the fraction of training data with an MD greater than or equal to the one for the given sample, assuming normally distributed data. The smaller the p-value, the less trustworthy the prediction. For highly non-normal X properties (e.g., fingerprints), the MD p-value is wildly inaccurate.

### Structural Similar Compounds

| Name                        | ACEMETACIN        | BENZENESULFONIC ACID; 2;2'-(4;4'-BIPHENYLYLENE)DI-; DISODIUM SALT (Na STRIPPED) | bis-OXATIN ACETATE |
|-----------------------------|-------------------|---------------------------------------------------------------------------------|--------------------|
| Structure                   |                   |                                                                                 |                    |
| Actual Endpoint (-log C)    | 4.235             | 1.968                                                                           | 1.717              |
| Predicted Endpoint (-log C) | 3.39415           | 1.72109                                                                         | 2.40947            |
| Distance                    | 0.698             | 0.716                                                                           | 0.742              |
| Reference                   | ARZNAD 30;1398;80 | MVCRB3 2;193;73                                                                 | NIIRDN 6;609;82    |

### Model Applicability

Unknown features are fingerprint features in the query molecule, but not found in the training set.

1. All properties and OPS components are within expected ranges.
2. Unknown FCFP\_6 feature: 16: [\*][c](:[\*]):[\*]
3. Unknown FCFP\_6 feature: 1618154665: [\*][c](:[\*]):[cH]:[cH]:[\*]
4. Unknown FCFP\_6 feature: 1747237384: [\*][c](:[\*]):n:[c](:[\*]):[\*]
5. Unknown FCFP\_6 feature: -1410049896: [\*]S[c](:n:[\*]):[c]([\*]):[\*]
6. Unknown FCFP\_6 feature: 71476542: [\*]:[c](:[\*])Cl

### Feature Contribution

#### Top features for positive contribution

| Fingerprint | Bit/Smiles | Feature Structure | Score |
|-------------|------------|-------------------|-------|
|             |            |                   |       |

| ECFP_6                                 | 642810091   | 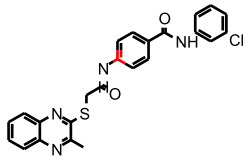<br>[*][c(:[*]):[*]]                        | 0.281  |
|----------------------------------------|-------------|--------------------------------------------------------------------------------------------------------------------------------|--------|
| ECFP_6                                 | -1897341097 | <br>[*]N[*]                                 | 0.216  |
| ECFP_6                                 | 577592657   | <br>[*][c]1:[*]:[cH]:[cH]<br>:c](Cl):[cH]:1 | 0.194  |
| Top Features for negative contribution |             |                                                                                                                                |        |
| Fingerprint                            | Bit/Smiles  | Feature Structure                                                                                                              | Score  |
| ECFP_6                                 | -817402818  | <br>[*]Cl                                 | -0.263 |
| ECFP_6                                 | 655739385   | <br>[*]:n:[*]                             | -0.239 |



|        |           |                                                                                                      |        |
|--------|-----------|------------------------------------------------------------------------------------------------------|--------|
| FCFP_6 | 566058135 | 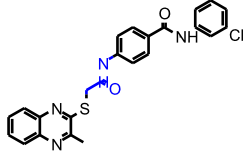<br>[*]CC(=O)N[*] | -0.216 |
|--------|-----------|------------------------------------------------------------------------------------------------------|--------|

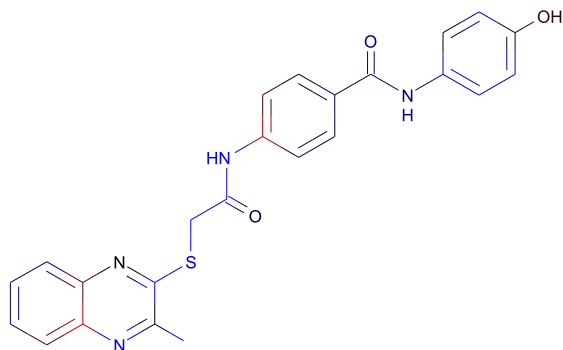
 $C_{24}H_{20}N_4O_3S$ 

Molecular Weight: 444.5056

ALogP: 3.836

Rotatable Bonds: 6

Acceptors: 6

Donors: 3

### Model Prediction

Prediction: 5.932

Unit: g/kg\_body\_weight

Mahalanobis Distance: 20.758

Mahalanobis Distance p-value: 1.85e-011

Mahalanobis Distance: The Mahalanobis distance (MD) is a generalization of the Euclidean distance that accounts for correlations among the X properties. It is calculated as the distance to the center of the training data. The larger the MD, the less trustworthy the prediction.

Mahalanobis Distance p-value: The p-value gives the fraction of training data with an MD greater than or equal to the one for the given sample, assuming normally distributed data. The smaller the p-value, the less trustworthy the prediction. For highly non-normal X properties (e.g., fingerprints), the MD p-value is wildly inaccurate.

### Structural Similar Compounds

| Name                        | BENZENESULFONIC ACID; 2,2'-(4,4'-BIPHENYLENEDIVINYLENE)DI-; DISODIUM SALT (Na STRIPPED) | OCHRATOXIN A    | ANTHRAQUINONE; 1;5-DIAMINO-4;8-DIHYDROXY-3-(p-METHOXYPHENYL)- |
|-----------------------------|-----------------------------------------------------------------------------------------|-----------------|---------------------------------------------------------------|
| Structure                   |                                                                                         |                 |                                                               |
| Actual Endpoint (-log C)    | 1.968                                                                                   | 4.305           | 1.771                                                         |
| Predicted Endpoint (-log C) | 1.72109                                                                                 | 3.03558         | 2.1122                                                        |
| Distance                    | 0.748                                                                                   | 0.825           | 0.829                                                         |
| Reference                   | MVCRB3 2;193;73                                                                         | FCTXAV 6;479;68 | 28ZPAK -;245;72                                               |

### Model Applicability

Unknown features are fingerprint features in the query molecule, but not found in the training set.

1. All properties and OPS components are within expected ranges.
2. Unknown FCFP\_6 feature: 16: [\*][c](:[\*]):[\*]
3. Unknown FCFP\_6 feature: 1618154665: [\*][c](:[\*]):[cH]:[cH]:[\*]
4. Unknown FCFP\_6 feature: 1747237384: [\*][c](:[\*]):n:[c](:[\*]):[\*]
5. Unknown FCFP\_6 feature: -1410049896: [\*]S[c](:n:[\*]):[c]([\*]):[\*]
6. Unknown FCFP\_6 feature: 74595001: [\*]:[cH]:[c](O):[cH]:[\*]
7. Unknown FCFP\_6 feature: -549108873: [\*]:[c](:[\*])O

### Feature Contribution

#### Top features for positive contribution

| Fingerprint | Bit/Smiles | Feature Structure | Score |
|-------------|------------|-------------------|-------|
|             |            |                   |       |

|                                               |                   |                                                                                                                                             |              |
|-----------------------------------------------|-------------------|---------------------------------------------------------------------------------------------------------------------------------------------|--------------|
| ECFP_6                                        | 642810091         | 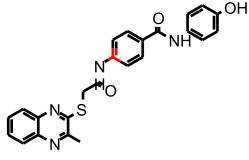<br>[*][c(:[*]):[*]]                                     | 0.281        |
| ECFP_6                                        | -1897341097       | <br>[*]N[*]                                              | 0.216        |
| ECFP_6                                        | 1444581947        | <br>[*]C(=[*])[c]1:[cH]:[<br>*]:[c]([*]):[cH]:[cH<br>]:1 | 0.163        |
| <b>Top Features for negative contribution</b> |                   |                                                                                                                                             |              |
| <b>Fingerprint</b>                            | <b>Bit/Smiles</b> | <b>Feature Structure</b>                                                                                                                    | <b>Score</b> |
| ECFP_6                                        | 655739385         | <br>[*]:n:[*]                                          | -0.239       |
| FCFP_6                                        | 566058135         | <br>[*]CC(=O)N[*]                                      | -0.216       |

|        |           |                                                                                                                                |        |
|--------|-----------|--------------------------------------------------------------------------------------------------------------------------------|--------|
| FCFP_6 | 946589555 | 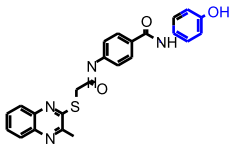<br>[*][c]1:[*]:[cH]:[c](<br>O):[cH]:[cH]:1 | -0.204 |
|--------|-----------|--------------------------------------------------------------------------------------------------------------------------------|--------|

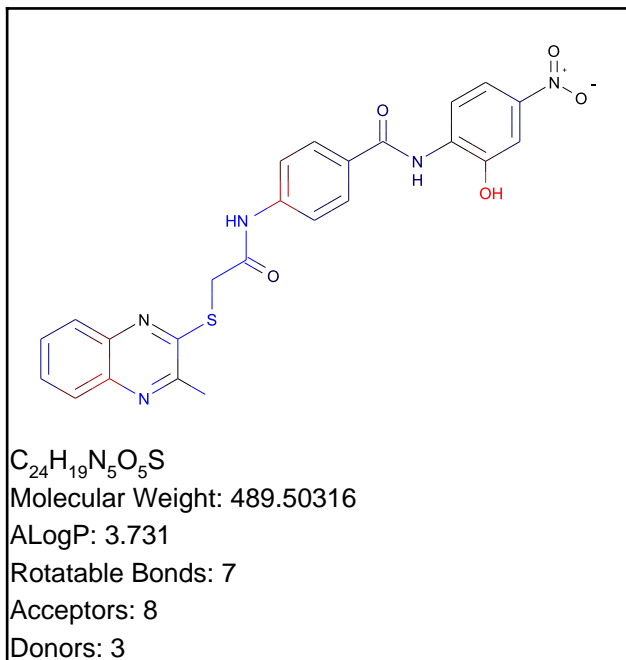

### Model Prediction

Prediction: 6.811

Unit: g/kg\_body\_weight

Mahalanobis Distance: 23.298

Mahalanobis Distance p-value: 3.53e-022

Mahalanobis Distance: The Mahalanobis distance (MD) is a generalization of the Euclidean distance that accounts for correlations among the X properties. It is calculated as the distance to the center of the training data. The larger the MD, the less trustworthy the prediction.

Mahalanobis Distance p-value: The p-value gives the fraction of training data with an MD greater than or equal to the one for the given sample, assuming normally distributed data. The smaller the p-value, the less trustworthy the prediction. For highly non-normal X properties (e.g., fingerprints), the MD p-value is wildly inaccurate.

### Structural Similar Compounds

| Name                        | 2;7-NAPHTHALENE DISULFONIC ACID; 4-AMINO-5-HYDROXY-; p-TOLUENE SULFONATE ESTER | AZOSEMIDE        | BENZENESULFONIC ACID; 2;2'-(4;4'-BIPHENYLYLENE)DI-; DISODIUM SALT (Na STRIPPED) |
|-----------------------------|--------------------------------------------------------------------------------|------------------|---------------------------------------------------------------------------------|
| Structure                   |                                                                                |                  |                                                                                 |
| Actual Endpoint (-log C)    | 1.615                                                                          | 2.163            | 1.968                                                                           |
| Predicted Endpoint (-log C) | 1.79606                                                                        | 2.21052          | 1.72109                                                                         |
| Distance                    | 0.840                                                                          | 0.847            | 0.865                                                                           |
| Reference                   | 85JCAE -;1063;86                                                               | IYKEDH 18;666;87 | MVCRB3 2;193;73                                                                 |

### Model Applicability

Unknown features are fingerprint features in the query molecule, but not found in the training set.

- All properties and OPS components are within expected ranges.
- Unknown ECFP\_2 feature: 1043790491: [\*][N+](=O)[\*]
- Unknown ECFP\_2 feature: 781519895: [\*][O-]
- Unknown ECFP\_2 feature: -179073144: [\*][N+](=O)[c](:c[\*]):c[\*]
- Unknown ECFP\_2 feature: -215026467: [\*]:[c](:[\*])[N+](=O)[O-]
- Unknown ECFP\_2 feature: 2104376220: [\*][N+](=O)[\*]
- Unknown ECFP\_2 feature: -659271057: [\*][N+](=O)[O-]
- Unknown FCFP\_6 feature: 16: [\*][c](:[\*]):[\*]
- Unknown FCFP\_6 feature: 8: [\*][N+](=O)[\*]
- Unknown FCFP\_6 feature: 5: [\*][O-]
- Unknown FCFP\_6 feature: 1618154665: [\*][c](:[\*]):[cH]:[cH]:[\*]
- Unknown FCFP\_6 feature: 1747237384: [\*][c](:[\*]):n:[c](:[\*]):[\*]
- Unknown FCFP\_6 feature: -1410049896: [\*]S[c](:n[\*]):[c]([\*]):[\*]
- Unknown FCFP\_6 feature: 74595001: [\*]:[cH]:[c](O):[cH]:[\*]
- Unknown FCFP\_6 feature: -828984032: [\*][N+](=O)[c](:[cH]:[\*]):[cH]:[\*]
- Unknown FCFP\_6 feature: -549108873: [\*]:[c](:[\*])O
- Unknown FCFP\_6 feature: -1338588315: [\*]:[c](:[\*])[N+](=O)[O-]
- Unknown FCFP\_6 feature: 1872392852: [\*][N+](=O)[\*]

19. Unknown FCFP\_6 feature: 260476081: [\*][N+](=[\*])[O-]

## Feature Contribution

### Top features for positive contribution

| Fingerprint | Bit/Smiles  | Feature Structure                                                                                                                                      | Score |
|-------------|-------------|--------------------------------------------------------------------------------------------------------------------------------------------------------|-------|
| ECFP_6      | 642810091   | 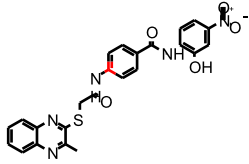<br><chem>[*][c](:[*]):[*]</chem>                                   | 0.281 |
| ECFP_6      | -1897341097 | <br><chem>[*]N[*]</chem>                                            | 0.216 |
| ECFP_6      | 1444581947  | <br><chem>[*]C(=[*])[c]1:[cH]:[cH]:[*]:[c]([*]):[cH]:[cH]:1</chem> | 0.163 |

### Top Features for negative contribution

| Fingerprint | Bit/Smiles | Feature Structure                                                                                               | Score  |
|-------------|------------|-----------------------------------------------------------------------------------------------------------------|--------|
| ECFP_6      | 655739385  | 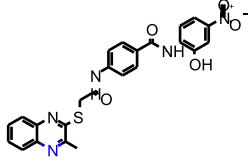<br><chem>[*]:n:[*]</chem> | -0.239 |

|        |           |                                                                                                          |        |
|--------|-----------|----------------------------------------------------------------------------------------------------------|--------|
| FCFP_6 | 566058135 | 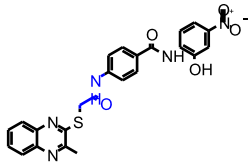 <p>[*]CC(=O)N[*]</p> | -0.216 |
| ECFP_6 | 734603939 |  <p>[*]C</p>          | -0.201 |

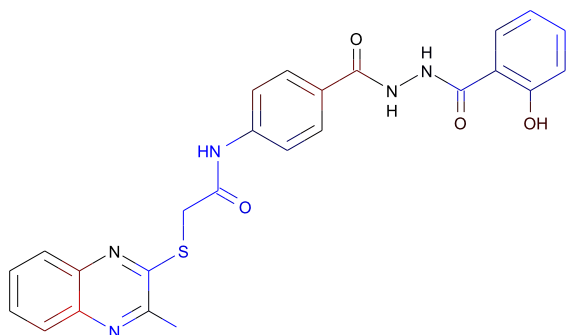

$C_{25}H_{21}N_5O_4S$

Molecular Weight: 487.53034

ALogP: 3.093

Rotatable Bonds: 7

Acceptors: 7

Donors: 4

## Model Prediction

Prediction: 4.703

Unit: g/kg\_body\_weight

Mahalanobis Distance: 23.110

Mahalanobis Distance p-value: 2.84e-021

Mahalanobis Distance: The Mahalanobis distance (MD) is a generalization of the Euclidean distance that accounts for correlations among the X properties. It is calculated as the distance to the center of the training data. The larger the MD, the less trustworthy the prediction.

Mahalanobis Distance p-value: The p-value gives the fraction of training data with an MD greater than or equal to the one for the given sample, assuming normally distributed data. The smaller the p-value, the less trustworthy the prediction. For highly non-normal X properties (e.g., fingerprints), the MD p-value is wildly inaccurate.

## Structural Similar Compounds

| Name                        | ANTHRAQUINONE; 1;5-DIAMINO-4;8-DIHYDROXY-3-(p-METHOXYPHENYL)- | AZOSEMIDE        | FEBANTEL          |
|-----------------------------|---------------------------------------------------------------|------------------|-------------------|
| Structure                   |                                                               |                  |                   |
| Actual Endpoint (-log C)    | 1.771                                                         | 2.163            | 1.624             |
| Predicted Endpoint (-log C) | 2.1122                                                        | 2.21052          | 2.37098           |
| Distance                    | 0.800                                                         | 0.818            | 0.890             |
| Reference                   | 28ZPAK -;245;72                                               | IYKEDH 18;666;87 | ARZNAD 28;2193;78 |

## Model Applicability

Unknown features are fingerprint features in the query molecule, but not found in the training set.

1. All properties and OPS components are within expected ranges.
2. Unknown FCFP\_6 feature: 16: [\*][c](:[\*]):[\*]
3. Unknown FCFP\_6 feature: -885461129: [\*]NNC(=[\*])[\*]
4. Unknown FCFP\_6 feature: 74595001: [\*]:[cH]:[c](O):[cH]:[\*]
5. Unknown FCFP\_6 feature: 1618154665: [\*][c](:[\*]):[cH]:[cH]:[\*]
6. Unknown FCFP\_6 feature: -549108873: [\*]:[c](:[\*])O
7. Unknown FCFP\_6 feature: 1747237384: [\*][c](:[\*]):n:[c](:[\*]):[\*]
8. Unknown FCFP\_6 feature: -1410049896: [\*]S[c](:n:[\*]):[c]([\*]):[\*]

## Feature Contribution

### Top features for positive contribution

| Fingerprint | Bit/Smiles | Feature Structure | Score |
|-------------|------------|-------------------|-------|
|             |            |                   |       |



| ECFP_6                                 | 642810091   | 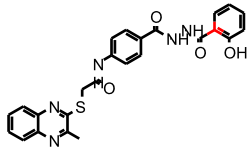<br>[*][c](:[*]):[*]                                     | 0.281  |
|----------------------------------------|-------------|---------------------------------------------------------------------------------------------------------------------------------------------|--------|
| ECFP_6                                 | -1897341097 | <br>[*]N[*]                                              | 0.216  |
| ECFP_6                                 | 1444581947  | <br>[*]C(=[*])[c]1:[cH]:[<br>*]:[c]([*]):[cH]:[cH<br>]:1 | 0.163  |
| Top Features for negative contribution |             |                                                                                                                                             |        |
| Fingerprint                            | Bit/Smiles  | Feature Structure                                                                                                                           | Score  |
| ECFP_6                                 | 655739385   | <br>[*]:n:[*]                                          | -0.239 |
| FCFP_6                                 | 566058135   | <br>[*]CC(=O)N[*]                                      | -0.216 |

|        |           |                                                                                                                                |        |
|--------|-----------|--------------------------------------------------------------------------------------------------------------------------------|--------|
| FCFP_6 | 946589555 | 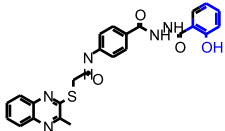<br>[*][c]1:[*]:[cH]:[c](<br>O):[cH]:[cH]:1 | -0.204 |
|--------|-----------|--------------------------------------------------------------------------------------------------------------------------------|--------|

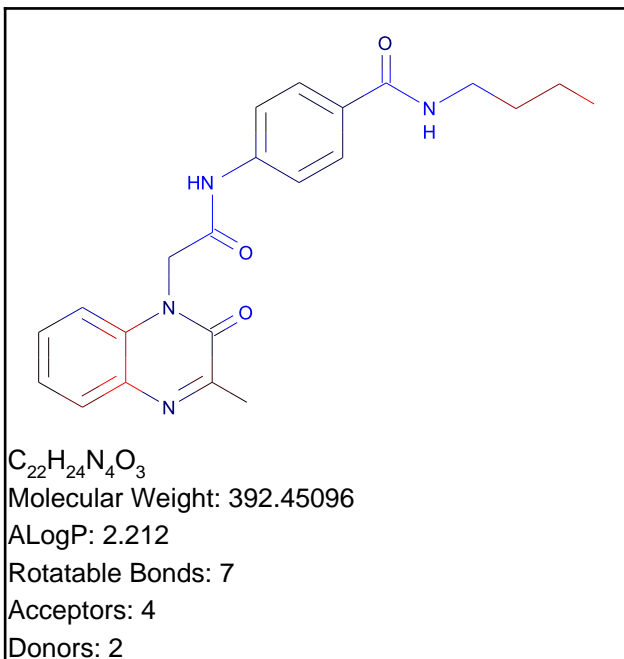

### Model Prediction

Prediction: 18.136

Unit: g/kg\_body\_weight

Mahalanobis Distance: 23.642

Mahalanobis Distance p-value: 7.05e-024

Mahalanobis Distance: The Mahalanobis distance (MD) is a generalization of the Euclidean distance that accounts for correlations among the X properties. It is calculated as the distance to the center of the training data. The larger the MD, the less trustworthy the prediction.

Mahalanobis Distance p-value: The p-value gives the fraction of training data with an MD greater than or equal to the one for the given sample, assuming normally distributed data. The smaller the p-value, the less trustworthy the prediction. For highly non-normal X properties (e.g., fingerprints), the MD p-value is wildly inaccurate.

### Structural Similar Compounds

| Name                        | CLEBOPRIDE; MALATE SALT (MALATE STRIPPED)                                           | HYCANTHONE                                                                          | BEZAFIBRATE                                                                         |
|-----------------------------|-------------------------------------------------------------------------------------|-------------------------------------------------------------------------------------|-------------------------------------------------------------------------------------|
| Structure                   | 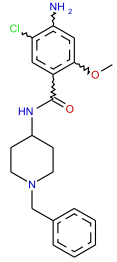 |  |  |
| Actual Endpoint (-log C)    | 2.168                                                                               | 2.561                                                                               | 1.946                                                                               |
| Predicted Endpoint (-log C) | 2.89926                                                                             | 2.91901                                                                             | 2.54395                                                                             |
| Distance                    | 0.534                                                                               | 0.547                                                                               | 0.553                                                                               |
| Reference                   | OYYAA2 25;803;83                                                                    | EJBLAB 1;181;74                                                                     | ARZNAD 30;2023;80                                                                   |

### Model Applicability

Unknown features are fingerprint features in the query molecule, but not found in the training set.

1. All properties and OPS components are within expected ranges.
2. Unknown FCFP\_6 feature: 16: [\*][c](:[\*]):[\*]
3. Unknown FCFP\_6 feature: 1618154665: [\*][c](:[\*]):[cH]:[cH]:[\*]
4. Unknown FCFP\_6 feature: 580453787: [\*]C(=N[c](:[\*]):[\*])[\*]

### Feature Contribution

#### Top features for positive contribution

| Fingerprint | Bit/Smiles | Feature Structure                                                                                         | Score |
|-------------|------------|-----------------------------------------------------------------------------------------------------------|-------|
| ECFP_6      | 642810091  | 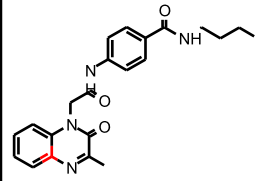<br>[*][c](:[*]):[*] | 0.281 |

|                                               |                   |                                                                                                                                     |              |
|-----------------------------------------------|-------------------|-------------------------------------------------------------------------------------------------------------------------------------|--------------|
| ECFP_6                                        | -1897341097       | 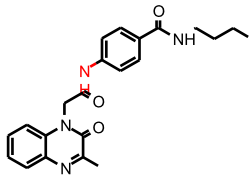<br>[*]N[*]                                      | 0.216        |
| ECFP_6                                        | 1444581947        | <br>[*]C(=[*])[c]1:[cH]:[*]:[c]([*]):[cH]:[cH]:1 | 0.163        |
| <b>Top Features for negative contribution</b> |                   |                                                                                                                                     |              |
| <b>Fingerprint</b>                            | <b>Bit/Smiles</b> | <b>Feature Structure</b>                                                                                                            | <b>Score</b> |
| ECFP_6                                        | 2106656448        | <br>[*]C(=O)[*]                                  | -0.352       |
| ECFP_6                                        | 497523368         | <br>[*]CNC(=[*])[*]                            | -0.301       |
| ECFP_6                                        | 655739385         | <br>[*]:n:[*]                                  | -0.239       |



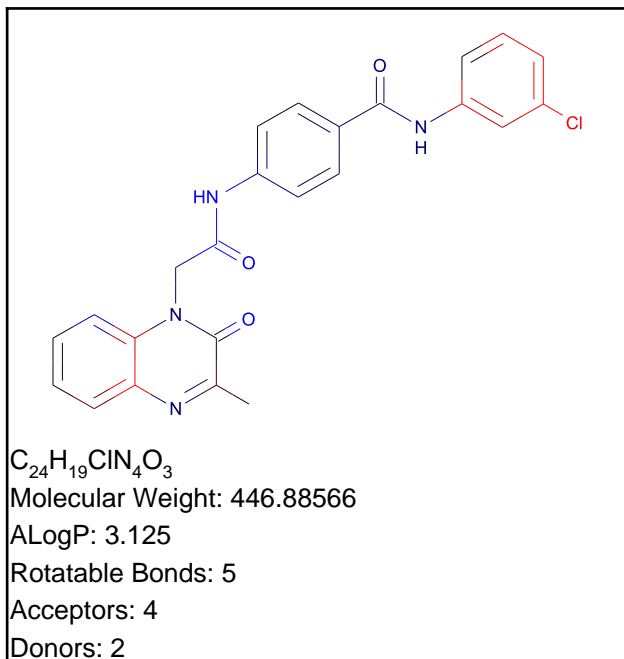

### Model Prediction

Prediction: 7.450

Unit: g/kg\_body\_weight

Mahalanobis Distance: 22.536

Mahalanobis Distance p-value: 1.29e-018

Mahalanobis Distance: The Mahalanobis distance (MD) is a generalization of the Euclidean distance that accounts for correlations among the X properties. It is calculated as the distance to the center of the training data. The larger the MD, the less trustworthy the prediction.

Mahalanobis Distance p-value: The p-value gives the fraction of training data with an MD greater than or equal to the one for the given sample, assuming normally distributed data. The smaller the p-value, the less trustworthy the prediction. For highly non-normal X properties (e.g., fingerprints), the MD p-value is wildly inaccurate.

### Structural Similar Compounds

| Name                        | 1-BENZENESULFONYL-5;5-DIPHENYLHYDANTOIN | FLUBENDAZOLE   | bis-OXATIN ACETATE |
|-----------------------------|-----------------------------------------|----------------|--------------------|
| Structure                   |                                         |                |                    |
| Actual Endpoint (-log C)    | 2.363                                   | 2.088          | 1.717              |
| Predicted Endpoint (-log C) | 2.34793                                 | 2.69288        | 2.40947            |
| Distance                    | 0.620                                   | 0.630          | 0.636              |
| Reference                   | ARZNAD 20;1579;70                       | YRTMA6 9;11;78 | NIIRDN 6;609;82    |

### Model Applicability

Unknown features are fingerprint features in the query molecule, but not found in the training set.

1. All properties and OPS components are within expected ranges.
2. Unknown FCFP\_6 feature: 16: [\*][c](:[\*]):[\*]
3. Unknown FCFP\_6 feature: 1618154665: [\*][c](:[\*]):[cH]:[cH]:[\*]
4. Unknown FCFP\_6 feature: 580453787: [\*]C(=N[c](:[\*]):[\*])[\*]
5. Unknown FCFP\_6 feature: 71476542: [\*]:[c](:[\*])Cl

### Feature Contribution

#### Top features for positive contribution

| Fingerprint | Bit/Smiles | Feature Structure    | Score |
|-------------|------------|----------------------|-------|
| ECFP_6      | 642810091  | <br>[*][c](:[*]):[*] | 0.281 |

|                                               |                   |                                                                                                                                |              |
|-----------------------------------------------|-------------------|--------------------------------------------------------------------------------------------------------------------------------|--------------|
| ECFP_6                                        | -1897341097       | 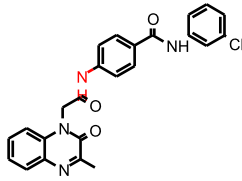<br>[*]N[*]                                 | 0.216        |
| ECFP_6                                        | 577592657         | <br>[*][c]1:[*]:[cH]:[cH]<br>:c](Cl):[cH]:1 | 0.194        |
| <b>Top Features for negative contribution</b> |                   |                                                                                                                                |              |
| <b>Fingerprint</b>                            | <b>Bit/Smiles</b> | <b>Feature Structure</b>                                                                                                       | <b>Score</b> |
| ECFP_6                                        | 2106656448        | <br>[*]C(=O)[*]                             | -0.352       |
| ECFP_6                                        | -817402818        | <br>[*]Cl                                 | -0.263       |
| ECFP_6                                        | 655739385         | <br>[*]:n:[*]                             | -0.239       |





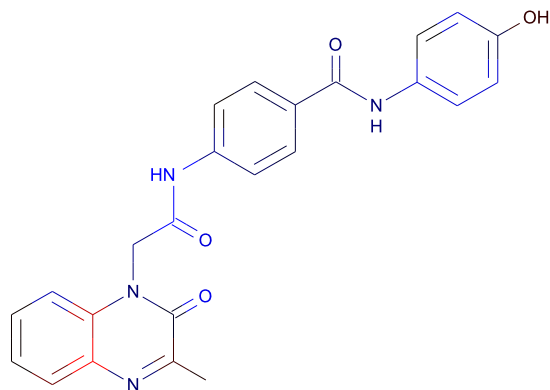
 $C_{24}H_{20}N_4O_4$ 

Molecular Weight: 428.44

ALogP: 2.218

Rotatable Bonds: 5

Acceptors: 5

Donors: 3

### Model Prediction

Prediction: 7.868

Unit: g/kg\_body\_weight

Mahalanobis Distance: 22.461

Mahalanobis Distance p-value: 2.77e-018

Mahalanobis Distance: The Mahalanobis distance (MD) is a generalization of the Euclidean distance that accounts for correlations among the X properties. It is calculated as the distance to the center of the training data. The larger the MD, the less trustworthy the prediction.

Mahalanobis Distance p-value: The p-value gives the fraction of training data with an MD greater than or equal to the one for the given sample, assuming normally distributed data. The smaller the p-value, the less trustworthy the prediction. For highly non-normal X properties (e.g., fingerprints), the MD p-value is wildly inaccurate.

### Structural Similar Compounds

| Name                        | OCHRATOXIN A    | PIRETANIDE      | SULFAQUINOXALINE |
|-----------------------------|-----------------|-----------------|------------------|
| Structure                   |                 |                 |                  |
| Actual Endpoint (-log C)    | 4.305           | 1.811           | 2.341            |
| Predicted Endpoint (-log C) | 3.03558         | 1.83976         | 2.42674          |
| Distance                    | 0.639           | 0.714           | 0.725            |
| Reference                   | FCTXAV 6;479;68 | DRFUD4 2;393;77 | MahWM# 16NOV82   |

### Model Applicability

Unknown features are fingerprint features in the query molecule, but not found in the training set.

1. All properties and OPS components are within expected ranges.
2. Unknown FCFP\_6 feature: 16: [\*][c](:[\*]):[\*]
3. Unknown FCFP\_6 feature: 1618154665: [\*][c](:[\*]):[cH]:[cH]:[\*]
4. Unknown FCFP\_6 feature: 580453787: [\*]C(=N[c](:[\*]):[\*])[\*]
5. Unknown FCFP\_6 feature: 74595001: [\*]:[cH]:[c](O):[cH]:[\*]
6. Unknown FCFP\_6 feature: -549108873: [\*]:[c](:[\*])O

### Feature Contribution

#### Top features for positive contribution

| Fingerprint | Bit/Smiles | Feature Structure    | Score |
|-------------|------------|----------------------|-------|
| ECFP_6      | 642810091  | <br>[*][c](:[*]):[*] | 0.281 |

|                                               |                   |                                                                                                                                     |              |
|-----------------------------------------------|-------------------|-------------------------------------------------------------------------------------------------------------------------------------|--------------|
| ECFP_6                                        | -1897341097       | 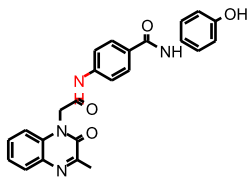<br>[*]N[*]                                      | 0.216        |
| ECFP_6                                        | 1444581947        | <br>[*]C(=[*])[c]1:[cH]:[*]:[c]([*]):[cH]:[cH]:1 | 0.163        |
| <b>Top Features for negative contribution</b> |                   |                                                                                                                                     |              |
| <b>Fingerprint</b>                            | <b>Bit/Smiles</b> | <b>Feature Structure</b>                                                                                                            | <b>Score</b> |
| ECFP_6                                        | 2106656448        | <br>[*]C(=O)[*]                                  | -0.352       |
| ECFP_6                                        | 655739385         | <br>[*]:n:[*]                                  | -0.239       |
| FCFP_6                                        | 566058135         | <br>[*]CC(=O)N[*]                              | -0.216       |



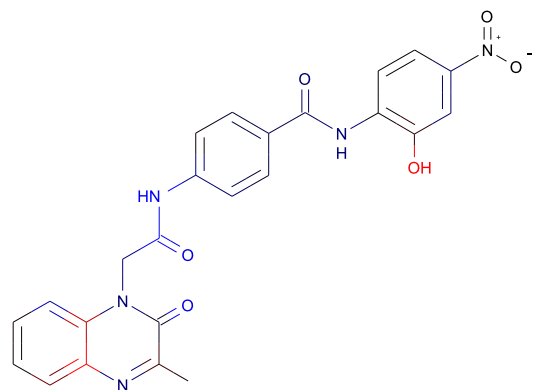
 $C_{24}H_{19}N_5O_6$ 

Molecular Weight: 473.43756

ALogP: 2.113

Rotatable Bonds: 6

Acceptors: 7

Donors: 3

### Model Prediction

Prediction: 5.470

Unit: g/kg\_body\_weight

Mahalanobis Distance: 26.984

Mahalanobis Distance p-value: 4.2e-043

Mahalanobis Distance: The Mahalanobis distance (MD) is a generalization of the Euclidean distance that accounts for correlations among the X properties. It is calculated as the distance to the center of the training data. The larger the MD, the less trustworthy the prediction.

Mahalanobis Distance p-value: The p-value gives the fraction of training data with an MD greater than or equal to the one for the given sample, assuming normally distributed data. The smaller the p-value, the less trustworthy the prediction. For highly non-normal X properties (e.g., fingerprints), the MD p-value is wildly inaccurate.

### Structural Similar Compounds

| Name                        | AZOSEMIDE        | FEBANTEL          | ANTHRAQUINONE; 1;5-DIAMINO-4;8-DIHYDROXY-3-(p-METHOXYPHENYL)- |
|-----------------------------|------------------|-------------------|---------------------------------------------------------------|
| Structure                   |                  |                   |                                                               |
| Actual Endpoint (-log C)    | 2.163            | 1.624             | 1.771                                                         |
| Predicted Endpoint (-log C) | 2.21052          | 2.37098           | 2.1122                                                        |
| Distance                    | 0.650            | 0.730             | 0.732                                                         |
| Reference                   | IYKEDH 18;666;87 | ARZNAD 28;2193;78 | 28ZPAK -;245;72                                               |

### Model Applicability

Unknown features are fingerprint features in the query molecule, but not found in the training set.

- All properties and OPS components are within expected ranges.
- Unknown ECFP\_2 feature: 1043790491: [\*][N+](=[\*])[\*]
- Unknown ECFP\_2 feature: 781519895: [\*][O-]
- Unknown ECFP\_2 feature: -179073144: [\*][N+](=[\*])[c](:c:[\*]):c:[\*]
- Unknown ECFP\_2 feature: -215026467: [\*]:[c](:[\*])[N+](=O)[O-]
- Unknown ECFP\_2 feature: 2104376220: [\*][N+](=O)[\*]
- Unknown ECFP\_2 feature: -659271057: [\*][N+](=[\*])[O-]
- Unknown FCFP\_6 feature: 16: [\*][c](:[\*]):[\*]
- Unknown FCFP\_6 feature: 8: [\*][N+](=[\*])[\*]
- Unknown FCFP\_6 feature: 5: [\*][O-]
- Unknown FCFP\_6 feature: 1618154665: [\*][c](:[\*]):[cH]:[cH]:[\*]
- Unknown FCFP\_6 feature: 580453787: [\*]C(=N[c](:[\*]):[\*])[\*]
- Unknown FCFP\_6 feature: 74595001: [\*]:[cH]:[c](O):[cH]:[\*]
- Unknown FCFP\_6 feature: -828984032: [\*][N+](=[\*])[c](:[cH]:[\*]):[cH]:[\*]
- Unknown FCFP\_6 feature: -549108873: [\*]:[c](:[\*])O
- Unknown FCFP\_6 feature: -1338588315: [\*]:[c](:[\*])[N+](=O)[O-]
- Unknown FCFP\_6 feature: 1872392852: [\*][N+](=O)[\*]
- Unknown FCFP\_6 feature: 260476081: [\*][N+](=[\*])[O-]

## Feature Contribution

| Top features for positive contribution |             |                                                                                                                                                               |        |
|----------------------------------------|-------------|---------------------------------------------------------------------------------------------------------------------------------------------------------------|--------|
| Fingerprint                            | Bit/Smiles  | Feature Structure                                                                                                                                             | Score  |
| ECFP_6                                 | 642810091   | 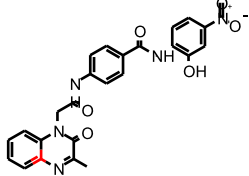<br><chem>[*][c](:[*]):[*]</chem>                                          | 0.281  |
| ECFP_6                                 | -1897341097 | <br><chem>[*]N[*]</chem>                                                   | 0.216  |
| ECFP_6                                 | 1444581947  | <br><chem>[*]C(=[*])[c]1:[cH]:[*]<br/>*: [c]([*]):[cH]:[cH]<br/>]:1</chem> | 0.163  |
| Top Features for negative contribution |             |                                                                                                                                                               |        |
| Fingerprint                            | Bit/Smiles  | Feature Structure                                                                                                                                             | Score  |
| ECFP_6                                 | 2106656448  | <br><chem>[*]C(=O)[*]</chem>                                             | -0.352 |

|               |                  |                                                                                                          |               |
|---------------|------------------|----------------------------------------------------------------------------------------------------------|---------------|
| <p>ECFP_6</p> | <p>655739385</p> | 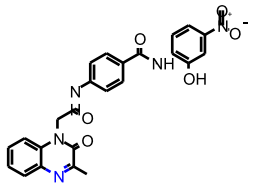 <p>[*]:n:[*]</p>     | <p>-0.239</p> |
| <p>FCFP_6</p> | <p>566058135</p> |  <p>[*]CC(=O)N[*]</p> | <p>-0.216</p> |

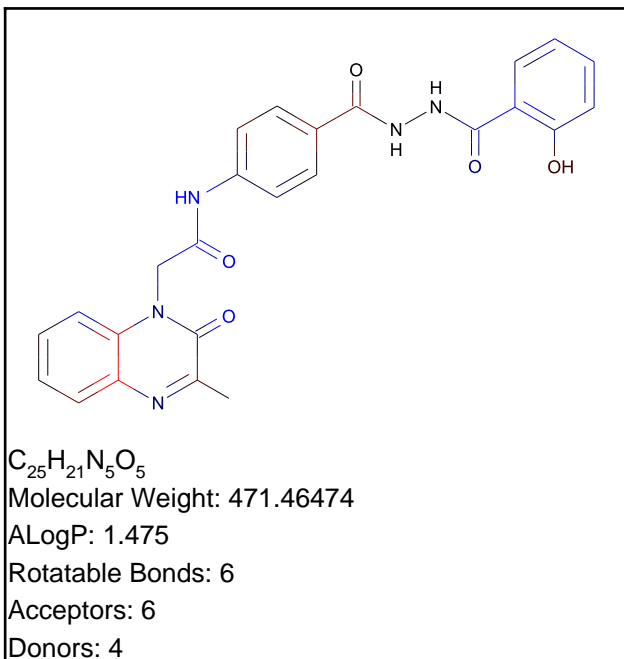

### Model Prediction

Prediction: 5.956

Unit: g/kg\_body\_weight

Mahalanobis Distance: 24.187

Mahalanobis Distance p-value: 1.11e-026

Mahalanobis Distance: The Mahalanobis distance (MD) is a generalization of the Euclidean distance that accounts for correlations among the X properties. It is calculated as the distance to the center of the training data. The larger the MD, the less trustworthy the prediction.

Mahalanobis Distance p-value: The p-value gives the fraction of training data with an MD greater than or equal to the one for the given sample, assuming normally distributed data. The smaller the p-value, the less trustworthy the prediction. For highly non-normal X properties (e.g., fingerprints), the MD p-value is wildly inaccurate.

### Structural Similar Compounds

| Name                        | ANTHRAQUINONE; 1;5-DIAMINO-4;8-DIHYDROXY-3-(p-METHOXYPHENYL)- | AZOSEMIDE        | OCHRATOXIN A    |
|-----------------------------|---------------------------------------------------------------|------------------|-----------------|
| Structure                   |                                                               |                  |                 |
| Actual Endpoint (-log C)    | 1.771                                                         | 2.163            | 4.305           |
| Predicted Endpoint (-log C) | 2.1122                                                        | 2.21052          | 3.03558         |
| Distance                    | 0.707                                                         | 0.730            | 0.748           |
| Reference                   | 28ZPAK -;245;72                                               | IYKEDH 18;666;87 | FCTXAV 6;479;68 |

### Model Applicability

Unknown features are fingerprint features in the query molecule, but not found in the training set.

1. All properties and OPS components are within expected ranges.
2. Unknown FCFP\_6 feature: 16: [\*][c](:[\*]):[\*]
3. Unknown FCFP\_6 feature: 1618154665: [\*][c](:[\*]):[cH]:[cH]:[\*]
4. Unknown FCFP\_6 feature: 580453787: [\*]C(=N[c](:[\*]):[\*])[\*]
5. Unknown FCFP\_6 feature: -885461129: [\*]NNC(=[\*])[\*]
6. Unknown FCFP\_6 feature: 74595001: [\*]:[cH]:[c](O):[cH]:[\*]
7. Unknown FCFP\_6 feature: -549108873: [\*]:[c](:[\*])O

### Feature Contribution

#### Top features for positive contribution

| Fingerprint | Bit/Smiles | Feature Structure | Score |
|-------------|------------|-------------------|-------|
|             |            |                   |       |

| ECFP_6                                 | 642810091   | 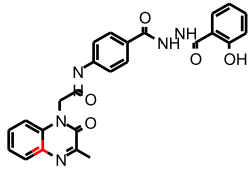<br>[*][c](:[*]):[*]                                     | 0.281  |
|----------------------------------------|-------------|---------------------------------------------------------------------------------------------------------------------------------------------|--------|
| ECFP_6                                 | -1897341097 | <br>[*]N[*]                                              | 0.216  |
| ECFP_6                                 | 1444581947  | <br>[*]C(=[*])[c]1:[cH]:[<br>*]:[c]([*]):[cH]:[cH<br>]:1 | 0.163  |
| Top Features for negative contribution |             |                                                                                                                                             |        |
| Fingerprint                            | Bit/Smiles  | Feature Structure                                                                                                                           | Score  |
| ECFP_6                                 | 2106656448  | <br>[*]C(=O)[*]                                        | -0.352 |
| ECFP_6                                 | 655739385   | <br>[*]:n:[*]                                          | -0.239 |



|        |           |                                                                                                                   |        |
|--------|-----------|-------------------------------------------------------------------------------------------------------------------|--------|
| FCFP_6 | 566058135 | 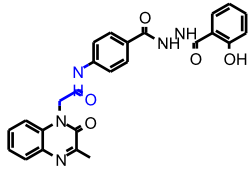<br><chem>[*]CC(=O)N[*]</chem> | -0.216 |
|--------|-----------|-------------------------------------------------------------------------------------------------------------------|--------|

# Sorafenib

TOPKAT\_Rat\_Oral\_LD50

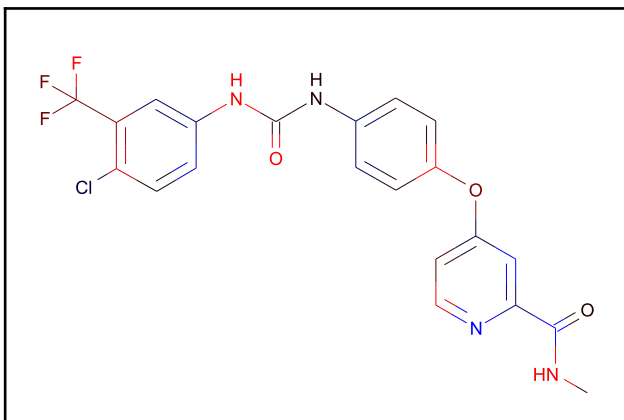

C<sub>21</sub>H<sub>16</sub>ClF<sub>3</sub>N<sub>4</sub>O<sub>3</sub>

Molecular Weight: 464.82494

ALogP: 4.175

Rotatable Bonds: 6

Acceptors: 4

Donors: 3

## Model Prediction

Prediction: 0.823

Unit: g/kg\_body\_weight

Mahalanobis Distance: 21.029

Mahalanobis Distance p-value: 1.93e-012

Mahalanobis Distance: The Mahalanobis distance (MD) is a generalization of the Euclidean distance that accounts for correlations among the X properties. It is calculated as the distance to the center of the training data. The larger the MD, the less trustworthy the prediction.

Mahalanobis Distance p-value: The p-value gives the fraction of training data with an MD greater than or equal to the one for the given sample, assuming normally distributed data. The smaller the p-value, the less trustworthy the prediction. For highly non-normal X properties (e.g., fingerprints), the MD p-value is wildly inaccurate.

## Structural Similar Compounds

| Name                        | FLUBENDAZOLE                                                                        | PHOSPHORAMIDOTHIOIC ACID; ACETIMIDOYL-; O; O-bis-(p-CHLOROPHENYL)ESTER              | BEZAFIBRATE                                                                         |
|-----------------------------|-------------------------------------------------------------------------------------|-------------------------------------------------------------------------------------|-------------------------------------------------------------------------------------|
| Structure                   | 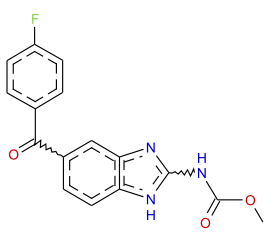 |  |  |
| Actual Endpoint (-log C)    | 2.088                                                                               | 5.006                                                                               | 1.946                                                                               |
| Predicted Endpoint (-log C) | 2.69288                                                                             | 3.23989                                                                             | 2.54395                                                                             |
| Distance                    | 0.697                                                                               | 0.703                                                                               | 0.721                                                                               |
| Reference                   | YRTMA6 9;11;78                                                                      | FMCHA2 -;C149;89                                                                    | ARZNAD 30;2023;80                                                                   |

## Model Applicability

Unknown features are fingerprint features in the query molecule, but not found in the training set.

1. All properties and OPS components are within expected ranges.
2. Unknown FCFP\_6 feature: 16: [\*][c](:[\*]):[\*]
3. Unknown FCFP\_6 feature: 1618154665: [\*][c](:[\*]):[cH]:[cH]:[\*]
4. Unknown FCFP\_6 feature: 1747237384: [\*][c](:[\*]):n:[c](:[\*]):[\*]
5. Unknown FCFP\_6 feature: 71476542: [\*]:[c](:[\*])Cl
6. Unknown FCFP\_6 feature: 136686699: [\*]NC

## Feature Contribution

### Top features for positive contribution

| Fingerprint | Bit/Smiles | Feature Structure | Score |
|-------------|------------|-------------------|-------|
|             |            |                   |       |

| FCFP_6                                 | 71953198    | 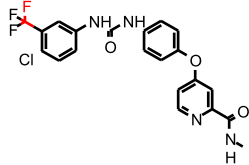<br>[*]C[*])([*])F   | 0.392  |
|----------------------------------------|-------------|---------------------------------------------------------------------------------------------------------|--------|
| ECFP_6                                 | -1046436026 | <br>[*]F             | 0.349  |
| ECFP_6                                 | 642810091   | <br>[*]c(:[*]):[*]   | 0.281  |
| Top Features for negative contribution |             |                                                                                                         |        |
| Fingerprint                            | Bit/Smiles  | Feature Structure                                                                                       | Score  |
| ECFP_6                                 | 226796801   | <br>[*]C[*])([*])F | -0.320 |
| ECFP_6                                 | -817402818  | <br>[*]Cl          | -0.263 |

|        |           |                                                                                                                                                           |       |
|--------|-----------|-----------------------------------------------------------------------------------------------------------------------------------------------------------|-------|
| ECFP_6 | 176455838 | 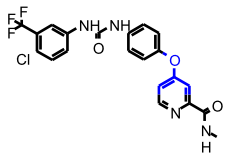 <p data-bbox="1386 284 1543 332">[*]O[e](:[cH]:[*]):[c<br/>H]:[*]</p> | 0.257 |
|--------|-----------|-----------------------------------------------------------------------------------------------------------------------------------------------------------|-------|
